# Supplementary material for: Character of Microbial Engraftment Following the Fecal Microbiota Transplantation in Patients with Inflammatory Bowel Diseases
Source: Research Square preprint supplement (doi:10.21203/rs.3.rs-999905/v1), 2021-10-27
Supplement: Supplementary file 1 [file 5669367a0586448dee927bcd.xlsx]

## Sheet: Table S1
Summary data about the patients included in the study.
Subject id	Geographical area	Gender	Disease	Local	Behavior	Disease extension	Age range	Medications history in the last 6 month	Basic therapy	CRP pre-FMT	CRP post-FMT	Calprotectin pre-FMT	Calprotectin post-FMT	HBI pre-FMT	HBI post-FMT	SCAI pre-FMT	SCAI post-FMT	Complications
CD1	Moscow, Russia	male	Crohn’s disease	L1	B2		30-40	5-ASA	5-ASA, Glucocorticoids	0.1	NA	103	53	5	2			artritis+resection of small intestine
CD5	Moscow, Russia	male	Crohn’s disease	L3	B1		50-60	5-ASA, Glucocorticoids	5-ASA, Glucocorticoids	11.4	5.7	123	65	38	10			artritis
CD16	Moscow, Russia	male	Crohn’s disease	L1	B1		40-50	Antidepressants	5-ASA	3.2	NA	78	24	5	1			resection of rectum
CD17	Moscow, Russia	male	Crohn’s disease	L1	B2		50-60	Antimicrobials	5-ASA, Glucocorticoids	6.1	0.9	68	32	7	1
CD27	Moscow, Russia	female	Crohn’s disease	L1	B1		50-60	Antimicrobials	5-ASA, Glucocorticoids	5.8	3.1	60	21	6	4			artritis
CD28	Moscow, Russia	male	Crohn’s disease	L1	B1		40-50		5-ASA	5.2	4.3	44	29	5	1
CD35	Moscow, Russia	male	Crohn’s disease	L1	B1		30-40	Antimicrobials	5-ASA	3.9	0.8	36	34	5	3
CD38	Moscow, Russia	male	Crohn’s disease	L1	B1		20-30	5-ASA, Probiotics	5-ASA	0.33	1.2	51	44	5	2
UC3	Moscow, Russia	male	Ulcerative colitis			Е3	20-30	5-ASA	5-ASA	12.7	7.9	314	163			8	4
UC8	Moscow, Russia	female	Ulcerative colitis			Е3	30-40	5-ASA	5-ASA	5.2	NA	247	28			6	1
UC15	Moscow, Russia	male	Ulcerative colitis			Е1	30-40		5-ASA	6.9	4.6	218	88			7	2
UC22	Moscow, Russia	male	Ulcerative colitis			Е3	20-30	5-ASA	5-ASA	1.4	12.3	169	412			6	1
UC33	Moscow, Russia	female	Ulcerative colitis			Е3	50-60	5-ASA, Glucocorticoids	5-ASA	8.2	2.1	438	81			7	1
UC36	Moscow, Russia	female	Ulcerative colitis			Е1	20-30	5-ASA	5-ASA	1.4	0.8	92	38			6	1	artritis

## Sheet: Table_S2
General information about obtained stool metagenomes and sequencing statistics.
sample_id	source_id	disease	donor_sample_id	time_point	raw	filter	human (%)	bacteria	viruses	archaea	eukaryota	Shannon_index
CD1_T1_B1	CD1	CD	DONOR2_T1_B4	1	14695420	12511138	0.0101739	99.9421	0.0431	0.01477	0	2.99239
CD1_T2_B1	CD1	CD	DONOR2_T1_B4	2	2593855	1821131	0.0261308	96.6832	3.31678	0	0	2.88827
CD16_T1_B3	CD16	CD	SPORT17_T1_B3	1	19262076	18845157	0.240421	99.958	0.04199	0	0	3.07272
CD16_T2_B3	CD16	CD	SPORT17_T1_B3	2	19985159	19468462	0.618496	99.9874	0.01258	0	0	1.99821
CD16_T3_B3	CD16	CD	SPORT17_T1_B3	3	19878628	19490324	0.0556326	99.8443	0.15571	0	0	2.03146
CD17_T1_B7	CD17	CD	SPORT17_T1_B3	1	5273717	4519054	1.05664	91.621	0.81323	7.56577	0	2.35498
CD17_T3_B7	CD17	CD	SPORT17_T1_B3	3	4937272	4566441	0.0861854	99.7323	0.26773	0	0	1.25397
CD17_T4_B7	CD17	CD	SPORT17_T1_B3	4	6062780	5690968	0.134313	97.8441	1.4183	0.73756	0	2.66076
CD27_T1_B7	CD27	CD	SPORT4_T1_B8	1	5710338	5202397	0.0679417	99.7426	0.2574	0	0	2.40094
CD27_T2_B7	CD27	CD	SPORT4_T1_B8	2	5947931	5486191	0.260213	99.882	0.11805	0	0	2.58984
CD27_T3_B7	CD27	CD	SPORT4_T1_B8	3	6363126	5225005	10.8032	99.3863	0.60405	0.00966	0	2.79495
CD28_T1_B7	CD28	CD	SPORT4_T1_B8	1	4465943	3920666	8.38585	95.4405	4.55954	0	0	2.33747
CD28_T2_B7	CD28	CD	SPORT4_T1_B8	2	4701915	4189117	0.944372	98.6374	1.36264	0	0	2.13822
CD28_T4_B7	CD28	CD	SPORT4_T1_B8	4	5659025	5020642	1.57897	98.7845	1.01244	0.20306	0	1.81827
CD35_T1_B7	CD35	CD	DONOR7_T1_B8	1	10089969	9524424	0.848693	99.8105	0.18948	0	0	2.58596
CD35_T2_B7	CD35	CD	DONOR7_T1_B8	2	7358701	5022898	28.1505	99.4975	0.50252	0	0	2.6557
CD35_T4_B7	CD35	CD	DONOR7_T1_B8	4	5923094	5244133	0.0997263	99.1847	0.06046	0.0995	0.6553	2.36073
CD38_T1_B7	CD38	CD	SFM028_T1_B1	1	3272318	2869195	0.0916838	99.7816	0.21835	0	0	2.16405
CD38_T2_B7	CD38	CD	SFM028_T1_B1	2	2854741	2450025	0.027176	94.9565	5.04354	0	0	1.15252
CD38_T4_B7	CD38	CD	SFM028_T1_B1	4	2869822	2564278	0.244654	99.8053	0.19466	0	0	3.14263
CD38_T5_B7	CD38	CD	SFM028_T1_B1	5	1792750	1525364	0.0442977	99.7989	0.20108	0	0	2.18918
CD5_T1_B2	CD5	CD	DONOR3_T2_B2	1	21407634	8860738	53.531	94.9288	5.07122	0	0	1.4167
CD5_T2_B6	CD5	CD	DONOR3_T2_B2	2	11852842	10150060	2.6979	98.2279	1.77212	0	0	2.38857
CD5_T3_B6	CD5	CD	DONOR3_T2_B2	3	14045628	13060815	0.735341	99.6768	0.32317	0	0	2.38888
UC15_T1_B3	UC15	UC	SPORT17_T1_B3	1	18848661	1066070	94.1314	84.1921	15.8079	0	0	2.20398
UC15_T2_B3	UC15	UC	SPORT17_T1_B3	2	18033183	1747734	89.9238	92.1709	7.82911	0	0	1.73833
UC15_T3_B3	UC15	UC	SPORT17_T1_B3	3	20947153	8304501	59.0623	99.2024	0.79756	0	0	3.0231
UC15_T4_B3	UC15	UC	SPORT17_T1_B3	4	22140695	19253016	11.1023	99.6685	0.33145	0	0	2.31637
UC15_T5_B5	UC15	UC	SPORT17_T1_B3	5	12037530	11248348	0.235213	95.4123	4.54399	0	0.04375	2.71525
UC22_T1_B6	UC22	UC	DONOR3_T3_B6	1	12312164	1423602	87.8367	75.5988	24.4012	0	0	2.10067
UC22_T2_B6	UC22	UC	DONOR3_T3_B6	2	13253042	2464359	80.4635	86.7081	13.2919	0	0	1.69212
UC22_T3_B6	UC22	UC	DONOR3_T3_B6	3	11820500	4586489	59.3149	90.6061	9.39386	0	0	2.72541
UC22_T4_B6	UC22	UC	DONOR3_T3_B6	4	11943411	10088652	12.6236	84.5295	15.4705	0	0	2.46881
UC22_T5_B6	UC22	UC	DONOR3_T3_B6	5	11953678	11556007	0.283591	93.6241	6.37592	0	0	2.81157
UC3_T1_B1	UC3	UC	DONOR2_T1_B4	1	24851740	3677298	82.9428	96.005	3.99502	0	0	2.15967
UC3_T3_B4	UC3	UC	DONOR2_T1_B4	3	18503038	16800638	5.95154	99.4805	0.51955	0	0	2.17513
UC3_T5_B5	UC3	UC	DONOR2_T1_B4	5	11332072	10601875	0.163101	98.4913	1.50866	0	0	2.20989
UC33_T1_B7	UC33	UC	DONOR7_T1_B8	1	4106121	749784	79.466	79.0891	20.9109	0	0	2.43739
UC33_T2_B7	UC33	UC	DONOR7_T1_B8	2	5227409	4506621	5.29221	99.609	0.391	0	0	1.13907
UC33_T3_B7	UC33	UC	DONOR7_T1_B8	3	5463711	2828190	39.635	95.5989	4.40112	0	0	2.36342
UC33_T4_B7	UC33	UC	DONOR7_T1_B8	4	4081915	3825269	1.16478	99.45	0.55002	0	0	2.44413
UC36_T1_B7	UC36	UC	DONOR7_T2_B8	1	6335147	4961894	17.1134	99.1051	0.89487	0	0	3.25427
UC36_T2_B7	UC36	UC	DONOR7_T2_B8	2	5701761	5184206	4.97353	98.4848	1.51523	0	0	3.26079
UC36_T3_B7	UC36	UC	DONOR7_T2_B8	3	6359109	4661133	20.6585	97.5899	2.41012	0	0	3.08851
UC36_T4_B7	UC36	UC	DONOR7_T2_B8	4	5457078	5055197	2.33111	99.4116	0.58836	0	0	2.93115
UC8_T1_B2	UC8	UC	DONOR3_T2_B2	1	15950933	9107563	33.5776	99.7094	0.29057	0	0	2.97242
UC8_T2_B2	UC8	UC	DONOR3_T2_B2	2	17104621	8128079	43.4673	99.6402	0.35979	0	0	2.93604
UC8_T3_B4	UC8	UC	DONOR3_T2_B2	3	14705793	14153779	0.522088	99.8573	0.14266	0	0	2.72993
DONOR2_T1_B4	DONOR2	HEALTHY_DONOR	NA	1	19578930	18409591	0.0261549	99.6483	0.35167	0	0	2.73203
DONOR3_T2_B2	DONOR3	HEALTHY_DONOR	NA	2	18134878	15922579	1.27534	99.976	0.02399	0	0	1.8463
DONOR3_T3_B6	DONOR3	HEALTHY_DONOR	NA	3	13323993	13013845	0.00443354	97.562	2.43804	0	0	2.67569
DONOR7_T1_B8	DONOR7	HEALTHY_DONOR	NA	1	10526103	10375475	0.108234	98.4962	1.44434	0.05948	0	2.26669
DONOR7_T2_B8	DONOR7	HEALTHY_DONOR	NA	2	12196809	11237623	0.0225264	99.9119	0.05415	0.03394	0	2.43786
SFM028_T1_B1	SFM028	HEALTHY_DONOR	NA	1	5616788	5320744	0.717014	99.8652	0.13479	0	0	2.36631
SPORT17_T1_B3	SPORT17	HEALTHY_DONOR	NA	1	24129581	23595999	0.216626	97.85	1.42498	0.1173	0.60768	3.17165
SPORT4_T1_B8	SPORT4	HEALTHY_DONOR	NA	1	8922483	8827083	0.115228	99.5645	0.29294	0.14256	0	2.86458

## Sheet: Table_S3
Taxonomic profiles of obtained metagenomes.
OTU_ID/Sample_ID	CD1_T1_B1	CD1_T2_B1	CD16_T1_B3	CD16_T2_B3	CD16_T3_B3	CD17_T1_B7	CD17_T3_B7	CD17_T4_B7	CD27_T1_B7	CD27_T2_B7	CD27_T3_B7	CD28_T1_B7	CD28_T2_B7	CD28_T4_B7	CD35_T1_B7	CD35_T2_B7	CD35_T4_B7	CD38_T1_B7	CD38_T2_B7	CD38_T4_B7	CD38_T5_B7	CD5_T1_B2	CD5_T2_B6	CD5_T3_B6	DONOR2_T1_B4	DONOR3_T2_B2	DONOR3_T3_B6	DONOR7_T1_B8	DONOR7_T2_B8	SFM028_T1_B1	SPORT17_T1_B3	SPORT4_T1_B8	UC15_T1_B3	UC15_T2_B3	UC15_T3_B3	UC15_T4_B3	UC15_T5_B5	UC22_T1_B6	UC22_T2_B6	UC22_T3_B6	UC22_T4_B6	UC22_T5_B6	UC3_T1_B1	UC3_T3_B4	UC3_T5_B5	UC33_T1_B7	UC33_T2_B7	UC33_T3_B7	UC33_T4_B7
Prevotella_copri	0	0	4.74621	52.9539	52.741	1.82516	0	7.56843	0	0	11.0134	0.00453	0.0008	2.98979	0	0.00434	36.4081	0	0	0	0	0	27.0562	9.48548	11.6866	56.5183	40.3555	38.1778	4.82685	0	0.01387	0	20.5597	49.6332	14.8012	38.5906	23.2892	0	42.4557	6.59476	29.622	8.88126	0.20974	36.2555	3.25053	0	0.01421	0.13811	2.01851
Faecalibacterium_prausnitzii	10.2848	10.6192	13.2675	1.84724	7.50579	2.33838	0.05561	20.1432	7.05972	9.65687	2.37748	0.01071	2.47415	1.74586	11.6835	9.40985	9.03386	3.81621	0	4.77931	0.58248	0	10.1709	28.2724	20.742	3.54829	2.95051	6.29168	22.2256	1.18469	10.2519	5.64127	19.4065	18.4192	13.9603	10.9809	11.4927	26.9742	14.7088	22.9732	6.15111	19.336	0.15049	19.2024	3.89049	5.63448	0.43548	3.07806	6.54309
Bacteroides_vulgatus	8.01432	4.57268	14.3253	6.36773	3.25305	0	0.00645	0.25759	1.04858	0.50088	2.74656	5.53917	0.80143	0	10.6109	11.0102	0.24335	1.81185	0.22628	3.70557	0.2584	0	4.84226	0.12177	0.58384	2.45157	5.8246	0	0	3.20324	7.08069	7.94557	0	0	6.45312	5.50832	5.03994	12.3196	14.4871	10.0854	13.9871	8.50181	0	1.17091	0.64103	0.26143	0.09721	0.1175	0.02725
Collinsella_aerofaciens	2.22931	3.12315	1.00807	1.2537	0.55022	11.6268	0.30291	4.13012	3.57697	2.67407	1.3225	0.02809	1.27454	4.4946	0.3215	0.46644	2.49533	31.6948	0.62123	1.70994	2.91567	0	1.87999	14.6676	1.35939	0.76583	0.66048	1.14273	4.60465	0.28734	1.03376	0.86852	0	0	2.20099	1.97906	10.4882	0.78178	0.7163	0.98054	1.74551	3.30468	0	1.47687	6.96716	9.21159	1.90183	16.1412	16.7668
Alistipes_putredinis	5.12028	3.65378	0.05013	0.02073	0.00583	0	0.10761	0.08804	0	0.00964	6.61372	9.82634	36.523	0	8.79723	11.0714	4.05017	0	1.88534	7.57517	11.7097	0	0	3.15075	0.23259	2.55253	9.19197	0.20773	0.11455	7.77385	4.35141	2.90317	0	0	0.0123	0	0	0	0.3209	11.4814	1.22256	0.70611	0	0.5106	0.00166	2.16572	13.197	16.6054	0.29944
Eubacterium_rectale	11.4604	19.0831	0.05438	0.09082	4.29093	1.81511	0	4.65565	21.3786	20.2371	4.36002	0	0.14822	0.99224	0	0	3.14262	0	0	8.27331	0	0	0	0.03131	1.6539	1.76173	0.48058	5.77391	26.8909	0.19246	0.34063	0.01505	0.31425	3.31963	1.67629	0.00595	0.97162	0.87013	0.01508	9.68747	1.62489	0.32915	0	0.03429	0.04657	0	0	0.14885	0.60588
Bacteroides_uniformis	0.84465	0.29494	6.65277	0.40269	1.51355	0	0.20476	0.005	0.09403	0.11091	0.08072	0.90651	2.11817	0.03345	11.2801	14.7818	0.40571	0.39008	0.04605	11.9985	0.22951	0	3.38812	0.07829	0.17702	5.76581	3.66226	0.93607	0.31015	14.523	6.18476	26.127	0	0	0.03319	0.9683	0	0	0.4493	1.20095	3.91473	5.90267	13.1845	0.55007	0.16251	0.93311	2.18667	0.72572	6.77279
Ruthenibacterium_lactatiformans	0.08317	0.56732	0.1792	0.06044	0.06233	5.20899	58.7107	0.67681	3.44668	3.50566	0.49924	13.8972	14.6305	3.61292	0.33842	0.3626	0.10442	5.05304	27.2353	8.48906	11.2936	0	0.06431	0.51426	0	0.01886	0.11697	0	0	0.31237	0.05092	0.02675	0	0	0.07549	0	0	0	0	0.07824	0.06672	0.02246	0	0.01917	0.14406	0	0.77588	1.37886	0.12868
Bifidobacterium_adolescentis	1.40134	7.04827	0	0	0.38918	2.34306	0	1.76875	0	0.00487	9.40014	0	0.12967	1.45764	0.90743	0.80783	4.6933	0	0	0	0	0	0.1616	5.51064	1.37967	6.73069	0.89285	6.84436	5.34567	0	0	1.46087	0	0	0	0	0	0.32927	1.75329	1.9084	2.46096	13.6202	8.25864	8.83322	33.66	9.22872	0.76111	0.29499	3.06346
Akkermansia_muciniphila	0	0	0	0.00477	0	0	0	18.2551	0	0.01099	0	12.1249	18.4089	0.09238	4.04601	4.86826	0.63688	0	57.2642	2.548	1.80409	0	0.00318	0	0	7.43499	0.12593	0.06083	0	1.81924	0.87738	0.20148	0	0	0	0	0	0	0	0	0	0	0	0	0	0	0	0	0
Firmicutes_bacterium_CAG_83	1.40318	1.73577	0.06076	0.56212	0.14179	37.4917	0.12282	0.20373	0	0	0.10076	0	0.22593	0.66164	5.20275	3.27157	0.07669	20.4564	1.08015	5.16137	27.3145	0	0	10.569	0.13609	0.0113	0.55906	0.05686	0.02324	0	0.05805	0.1349	0	0	0.70402	0.15207	0	0	0.11866	0.69738	0.8052	0.56922	0	0.07445	0.01771	0.20887	0.10522	0.36873	0.1626
Roseburia_faecis	11.6409	6.74132	10.777	10.4281	3.88734	0.47791	0	0	4.32277	4.76502	1.3922	0	0	0	0	0	1.17026	0	0	0	0	0	0.54931	3.32685	11.774	0.06456	2.68144	2.35992	0.53793	0.08226	4.33719	1.80653	0	0	0.03628	3.17157	8.6019	0	0	0	0	0	0	0	0	0	0	0	0.02909
Escherichia_coli	4.40313	3.7105	0	0	0.00232	0.34316	23.3627	0	0.0859	0.03112	0	0.6761	0.50622	0	0.42362	3.80241	0.14481	0	0.12633	4.59787	1.25898	19.4308	1.32078	0.17377	0	0.0085	0.01749	0.86068	0.89176	2.40489	0.00135	0.27936	20.7722	4.11608	5.15801	0.00613	1.09238	0	0	0	0	0	1.31989	0.05135	0.04685	0	0	0.01597	0.02557
Bacteroides_dorei	0	0	2.03479	0.7643	0.58215	0	0	0	0	0	0	0.46671	0.2044	0	0	0	0	0	0	0	0	0	4.04507	0.14629	0.00405	1.20207	2.35591	0.87527	0.44249	4.50426	0	1.67859	0	0	0	0	0	0	0.23658	0.72943	0.027	0	30.3446	0.40075	0.55696	0	0	0	0
Ruminococcus_bicirculans	0	0	0	0	0	0	0	1.78421	0.6099	6.47862	0.15709	0	0	0	21.758	15.5333	0.32384	0	0	1.91226	0	0	0	0	0.1081	0	0.17107	0.01047	0	1.86709	6.01827	6.37208	0	0	0	0	0	0	0	0	0	0	0	0	0	0	0.14837	0.35337	17.2368
Eubacterium_sp_CAG_180	0	0	0.06334	0.01365	0.01111	2.5135	0	0.02084	0	0	0	0	0	0	0	0	0	0	0	0	0	0	0	0.00888	0	0	1.2531	0.18848	0	0	0	0.00713	0	0	0	0	0	0	0	0.22847	0	0	0	0	0	8.29579	61.8887	13.741	3.25397
Cyprinid_herpesvirus_3	0	0.06211	0	0.00478	0	0.02727	0	0.03266	0	0	0.06584	0.11441	0	0	0	0.44686	0	0.18534	0	0	0.0736	0.11336	0.11777	0	0	0	1.32933	0	0	0	0	0	7.52326	2.48387	0.29107	0.08832	3.81909	18.857	12.4936	8.59734	6.44577	5.88466	0.54457	0	1.4735	10.9336	0.14394	2.88998	0
Bacteroides_stercoris	1.01064	0.44243	0.02942	0.07066	0.22854	0	0.12887	0	0	0	0.05158	0	0	0	1.61731	1.96244	0	0.317	0.06412	0.23482	0	0	0.1438	0.04749	0.02705	0	0.0115	0	0	26.5157	0	12.0405	0	0	1.74769	3.34173	1.20196	0	0.10925	0	2.00836	1.25386	0	0.10871	0.07053	0	0	0	0
Barnesiella_intestinihominis	1.09682	0.38076	0.20297	0.10555	0.2721	0	0	0	0	0	0.01319	27.0785	1.22117	0	0	0	0.24981	0	0	0	0	0	0.02923	0.09305	0	0.03843	3.75985	0.43634	0.09696	2.06994	1.9206	4.00277	0	0	0.59278	0	0	5.06188	0.15675	3.70516	4.12781	3.592	0	0.53871	0	0	0	0	0.07293
Dorea_longicatena	0.83799	1.42067	2.80295	1.34428	0.7047	4.32064	0.03695	0.38388	3.81491	6.27816	23.1705	0	0.03103	0.67004	0.46429	0.18958	0.24851	0	0	2.70648	0	0	0.08714	0.64605	2.09159	0.20747	0.33965	0.58262	1.21578	0.09099	0.34879	0.39016	0	0	0.71918	0.9578	1.00561	1.56463	0.33793	1.28594	0.93969	1.61987	0	0.28005	1.3056	0	0	0	0
Bifidobacterium_longum	0.9869	2.3125	0	0	0.25557	2.49991	0.16961	0	0	0.03877	8.87956	0	0.08085	1.79141	4.72444	5.32878	1.24577	0	0	0.09514	0	0	3.63927	2.55158	0.10829	0.20715	0.3099	0.68912	1.21658	0.00625	0.80146	0.31733	0.15649	1.36263	2.65368	0.8554	2.25963	1.12906	0.46274	2.39648	1.26375	1.5336	3.5166	1.77148	4.31169	1.06369	0.18479	1.56046	3.38337
Bacteroides_caccae	1.03974	0.31002	1.96751	1.03708	0.19578	0	0	0.08266	0.05469	0.09925	1.20949	3.26804	0.35702	0.0056	0	0	0.09328	0.18331	0.0711	2.46602	0.25827	0	0.50132	0.0444	0	0.00319	0.67933	0	0	0	0	1.62845	0	0	0	11.3597	0	16.4521	0.68152	4.16919	1.11054	0.2148	0	0	0	0	0	0	0
Alistipes_finegoldii	0.01185	0	0.04887	0.07391	0	0	0	0	0.12514	0.32356	0.14573	1.74228	3.15647	0	1.27887	1.50757	0.2567	1.24114	2.0479	6.0768	16.6805	0	0	0.03825	0.00486	0.14507	0.17969	0.00799	0.00045	20.8245	0.50139	0.03285	0	0	0.00506	0	0	0	0	0.25131	0.01628	0.0013	0	0.02127	0	0	0	0.00299	0.01471
Bifidobacterium_bifidum	0.50218	1.30438	0	0	0	0	0	0	0	0	1.58729	0	0.65797	4.75912	0	0	1.61102	0	0	0	0	2.70864	0.23436	6.05996	0	0	0	1.92076	3.05608	0	0	0.08804	0.31144	1.21139	1.381	0	0.0022	0.24339	0.24869	1.95757	2.60762	6.15837	0.61073	0.94314	5.1001	3.02988	0.2985	1.58265	6.22007
Holdemanella_biformis	0.80175	1.7332	0.29805	0.22747	0.16679	0	0	0.02642	2.13849	1.9615	0.16667	0	0.11213	49.0802	0	0	0	0	0	0.04419	0	0	0	0.01713	1.63935	0	0.02225	0.28449	1.98684	0	0	0	0	0	0.00748	0.69021	0.25417	0	0	0	0.01821	0.18067	0	0.34308	0.63924	0	0	0	0
Oscillibacter_sp_57_20	0.84096	0.252	0	0	0.02727	0.08169	0	3.74028	0	0.48679	0.61796	0	0	0.11813	1.49075	1.1267	1.20192	9.57011	0	0.886	13.4594	0	0	1.57698	0.24979	0.00354	0.68229	0.49604	0.10649	0.06682	1.51352	0.60896	0	0	3.24187	3.26059	0.01326	0	0.06427	0.04927	0.00921	0.42291	0	0.078	0.00631	0.69804	1.54232	1.50379	0.11781
Veillonella_parvula	0.01777	0	0	0	0	0	0	0	0.02621	0	0	0	0	0	0.14173	0	0	0	0.00896	0	0	33.6392	18.3152	0.17058	0.10634	0.00682	0.0224	0.08001	0.03142	0	0	0	1.17196	1.23301	0.28811	0.03968	0.13679	0	0	0	0	0	0.2347	0.01417	0	0	0	0	0
Phascolarctobacterium_succinatutens	0.86008	0.09059	4.97588	6.45507	1.69827	0.12971	0.16098	9.89874	0.39604	0.79737	1.88294	0	0.25414	0.93871	0	0	7.10842	1.29599	0.07104	4.4561	0.13907	0	0	0	0	0	0	0	0	0	0	0.9732	0	0	0	0	0	0	0	0	0	0	0	0	0	0	0	0	0
Streptococcus_parasanguinis	0.00942	0	0.01586	0	0.01007	0.01076	0.00305	0	23.852	15.9679	1.81276	0	0	0.03284	0	0	0	0.0073	0.04078	0.25796	0	2.63766	0.04546	0.01588	0.04346	0.06197	0.09463	0.06837	0.12646	0	0.0629	0	0	0.01778	0.93121	0.7426	0.1679	0	0	0	0	0.05224	0.27324	0.14743	0.03988	0	0.01813	0.06169	0.13267
Fusicatenibacter_saccharivorans	0.28318	0.21028	2.104	0.84009	0.31259	0.5832	0	1.71296	0.30518	0.40853	0.64179	0	0.0413	0.22158	1.54061	1.73607	0.2748	0.84812	0	0.00561	0	0	0.45401	0	1.2954	0.0049	1.00941	0.50183	1.96563	0.49225	0.07827	3.05113	2.38034	1.99038	0.41762	0	0	0.09301	0	0.33974	0.52136	3.6594	0	0	2.94405	0	0	0	0
Bacteroides_thetaiotaomicron	0.24369	0.02251	1.27813	0.21836	0.06889	0	0	0	0	0	0.7245	1.344	0.37416	0	0.27505	0.27911	0.07683	0.19468	0	1.96211	0	0	2.04717	0.05635	0.12337	1.07952	1.21062	0.08617	0.04011	0.98767	1.54395	1.71121	0	0	1.00187	0.17057	1.04461	0	0.3592	0.72756	0.14974	0.03186	7.39509	0.13375	0.00738	0	0	0	0
Flavonifractor_plautii	0.0534	0	1.29336	0.29993	0.03726	0.01756	1.46339	0.29839	2.01777	1.408	0.6533	3.85233	4.32903	0	0.13526	0.04979	0.00209	5.6834	1.20625	0.3922	0.4795	0	0.08675	0.20159	0.02953	0.33943	0.24291	0	0.00252	0.49543	0.03648	0.00733	1.08865	0.87546	0.38223	0.27821	0.12023	1.08131	0.13946	1.72765	0.40168	0.27817	3.67932	0.97995	0.12699	1.03087	0.18873	0.76551	0
Roseburia_inulinivorans	0.65508	0.2304	1.71454	3.56728	4.30178	0.07028	0	0.8424	1.2698	0.9291	0	0	0	0	0.20588	0.05922	0.09789	0.33763	0	0	0	0	0.04527	0.12464	0.43032	0	0.04947	0.03002	0.06513	0.0458	2.34803	0.02652	0	0	0.90106	2.85784	0.54521	0	0	0	0	0.02268	9.79765	0.11997	0.06775	0	0	0	0
Ruminococcus_bromii	4.61858	6.40784	0.02502	0.41556	0	3.29134	0	0	0	0	0	0	0	0	0	0	2.952	0	0	0	0	0	0	0	0.10876	0	0.21019	0	0.07325	0.11975	2.0768	0	0	0	0	0	0	0	0	0.79569	0	0	0	0	0	0	0	0	0
Ruminococcus_torques	0.01531	0.13254	0.57798	0.42399	0.69991	0.17965	0.03792	0.39643	0	0	0.51656	0	0.43445	5.09993	0.08001	0.04733	0	0	0	0.58874	0	0	1.56673	0.63358	2.64918	0	0.44879	2.80112	4.47277	0.15459	0.66605	0.7745	0	0	0.03984	0.01344	0.69004	1.35922	0.01013	0.54979	0.58559	1.93278	0	0.07542	0.03853	0	0	0	0
Agathobaculum_butyriciproducens	1.1956	0.2634	0.97332	0.33885	0.24893	1.15791	0.17167	3.02123	9.49527	5.01154	0.35806	0	0.18388	0.07337	0.12161	0.1431	0.0841	0.80952	0.13814	0.25515	0	0	0.3121	0.75877	0.58891	0.42355	0.3242	0.12468	0.42615	0.01076	0.48432	0.14004	0.2673	0.15208	1.32502	0.40938	0.52015	0	0.05985	0.2599	0.24922	0.57517	0	0.38324	0.27001	0.44334	0.08893	0	2.16931
Bacteroides_plebeius	0	0	0	0	0	0	0	0	0.05056	0.12404	0.2459	0	0	0	0	0.03131	0	0	0	0	0	0	0	0	0.86574	0	0	0	0	0	15.7169	0	0	0	12.7459	0.04886	0	0	0	0	0	0	0	4.04837	1.20279	0.82704	0.04668	0.05178	0.32075
Oscillibacter_sp_CAG_241	0.36099	0.10912	0.68197	0.00042	0.92427	1.12488	0	0.34078	0	0	0.01012	0	0	0.00651	0.20872	0.19463	1.55386	0	0	0.44764	3.93278	0	0	0	0.1257	0	0	0.17327	0.03919	0.17747	0.81509	0.04051	0	0	1.23399	0.00107	0	0	0	0	0	0	0	0.00633	0	0	1.69911	2.80779	0.89294
Eggerthella_lenta	0	0	0	0	0	0	0.75379	0	0	0	0	4.81115	0.66132	0	0	0	0	11.7463	1.46466	0.5704	2.79207	0	0	0.11628	0	0.04456	0	0	0	0	0.08022	0	5.57266	0.56955	0.06782	0.09714	0.08851	0	0	0	0	0	0	0	0	0	0	0.07315	0
Anaerostipes_hadrus	0.27339	0.77449	4.46791	0.74825	1.15632	0	0	0	0	0	0.16366	0	0	0	0.03779	0	0	0	0	0	0	0	0	0.13064	3.02563	0.001	0.11439	0.96341	0.41208	0.06598	2.86769	0.74	0.71098	1.26367	1.31452	1.15443	4.67212	0	0	0	0.13298	0.13105	0	1.20623	2.36334	0	0	0	0
Parabacteroides_distasonis	0.39687	0.12678	2.2365	0.49456	0.39901	0	0.03101	0.17922	0	0	0.30704	0.25313	0.17516	0.00686	0	0	0.25259	0.03964	0	1.29495	0.01376	0	0.4364	0.01686	0.1051	2.79339	2.26927	0.54687	0.26115	0.48417	0.26176	1.23427	0	0	0.68255	1.33317	1.64463	0	0.40082	0.65008	1.49932	0.2295	0	0.2192	0.12473	0	0	0	0
Slackia_isoflavoniconvertens	0.18792	0.46635	0.09804	0.05212	0.03005	2.30227	0.26615	0.78475	0	0	0.11863	0	0	0.11661	0	0	0.40398	0	0	0	0	0	0	0.22234	0.17048	0.05884	0.00412	0.23652	1.26558	0	0	0	0	0	0.16192	0.3731	1.58997	0	0.05215	0	0.05826	0.14218	0	0.03044	0.1088	0.96404	0.21915	3.942	2.60109
Ruminococcus_gnavus	0	0.04352	0	0.0126	0.00107	0.01841	9.38872	0	0.88617	0.36061	0	0.12429	2.26144	1.33536	0	0	0	0.12784	0.83846	0	0	0	0	0	0	0.67188	0	0	0	0	0	0	0.47194	1.08713	0.32994	0	0.14069	0	0	0	0	0	5.04453	0	0	0	0	0	0
Roseburia_hominis	0	0	0.08446	0.13739	0.01442	0.20161	0	2.38728	0.45084	0.25047	4.95465	0	0	0.24571	1.71508	0.98301	0.24357	0	0	1.35111	0.08151	0	0.16059	0.59655	0.12593	0	0.00428	0.55112	0.60369	0.01574	0.27322	0.25872	0	0	0.12194	0	0.03276	0	0	0	0	0	0	0	0	2.18312	0.03619	0.11259	0.3584
Coprococcus_comes	1.14157	2.00382	0.7577	0.04849	0.16184	0.44831	0.60551	0.43381	0.25374	0.2784	0.08216	0	0.0033	0	0.03219	0.0114	0.00494	0.02235	0	0.38401	0	0	1.48249	1.69456	1.01794	0.10551	0.16611	0.65574	0.4699	0.14634	1.21263	0.27941	0	0	0.77855	1.19302	0	0.27515	0.11423	0.47511	0.27528	0.67404	0	2.36012	0.71116	0	0	0	0.02135
Bacteroides_fragilis	0	0	0	0	0	0	0	0	0.0271	0.10301	0.72479	0.21354	0.10019	0	0	0.02665	0.25187	0	0	0.53811	0.49316	0	0	0	0	0	0	1.00867	0.30383	4.59888	0.74333	0.11298	0	0	5.49174	0.02258	0	0	0	0	0	0	0	0	0	0	0	0	0
Streptococcus_salivarius	0.01144	0.53019	0.01501	0	0.0194	0.04767	0.01747	0	6.43351	3.2102	0.33949	0	0	0	0	0	0	0	0	0	0	3.62572	0.14373	0.00053	0.18697	0.26982	0.34192	0.143	0.70169	0	0.05976	0.07636	0	0	2.80458	0.61541	0.82951	0	0	0	0.00043	0.10233	1.59248	0.39096	0.23035	0	0	0	0
Dorea_formicigenerans	0.6962	2.24544	0.66132	0.79926	0.31155	0.12632	0.02321	0.35202	0	0	1.04572	0	0.11179	0.28243	0.15582	0.07095	0.03759	0.00399	0	1.52848	0.28838	0	0.1493	0.09088	0.26376	0.12194	0.1432	0.34394	0.87571	0.18108	0.1089	0.1252	1.69314	1.24462	1.08736	0.46648	1.28383	0	0	0.11266	0.27239	0.41851	0	0.36663	0.9091	0	0	0.07901	0.01837
Blautia_wexlerae	0.17161	0.10421	0.36288	0.53003	0.30152	0	0.06881	0	0.84861	8.79094	0.23321	0	0.00096	0.02058	0.04397	0.03601	0	0	0	0	0	0	0.01151	0.07838	0.1115	0.01957	0.21159	0.10677	0.24295	0.02882	0.00817	0.25664	0.22238	0.55503	1.21264	0.07625	4.36308	0	0	0.09365	0.56115	0.3244	0	0.04269	0.03037	0	0	0	0
Parabacteroides_merdae	0.06006	0	3.45576	0.8853	1.59813	0	0.00594	0.00737	0.01676	0.02714	0.24475	0.58165	0.17879	0.00636	1.06581	1.53962	0.22539	0.05028	0.01622	0.20605	0	0	0.43876	0.08001	0.51258	0.12793	1.98318	0.29811	0.01375	0	0	0.9416	0	0	0	0	0	0	0.41399	0.24395	1.13148	0.66155	0	0.54512	0.4118	0	0.00405	0	0
Eubacterium_eligens	4.39334	0.1271	0	0	1.75937	0	0	0	0	0.17153	0	0	0	0	0.29222	0.24135	0.81426	0	0	0	0	0	0.56176	0.06861	2.5552	0	0.56604	0	0	0	2.26254	0.01262	0	0.19777	0.22058	1.25265	0.00285	0.2187	0	0.20783	0.00701	0.12845	0	0.35867	0	0	0.00073	0	0
Roseburia_intestinalis	0	0	0.16023	0.01843	0.25685	0	0	0.19238	0	0	0	0	0	0	1.06924	0.80157	0	0	0	0	0	0	0	0.01155	7.81968	0	0.82742	0	0	0.16558	1.91256	0.33832	0	0.95896	0.7495	0	0.49775	0	0	0	0	0	0	1.74974	0.00108	0	0	0	0
Alistipes_inops	0	0	0	0	0	0	0	0	0	0	0	0.23757	1.98141	0	0	0	0	0	0	0	0	0	0	0.0179	0	0.04825	0.5573	0	0	0	0	0	0	0	0	0	0	0	0	0.70689	0	0	0	0	0	0	0	0	0
Eubacterium_hallii	0.21289	0.21664	2.09218	1.01387	0.50076	0	0	0.01471	0	0	0	0	0.06878	0	0	0	0	0	0	0	0	0	0.12789	0.0666	1.26098	0.18597	0.1653	1.00186	0.96479	0.07904	1.09207	1.80993	0	0	0.09521	0.03059	0.71497	0	0	0.18349	0.3361	1.92589	0	0.06923	0.75129	0	0	0	0
Alistipes_shahii	0.00782	0	0.55764	0.02377	0.09504	0	0	0.01942	0.01257	0.04179	0.11541	4.11045	0.99022	0	0.81087	1.35036	0.08815	0.98174	0.07415	0.26647	0.50453	0	0	0.03028	0.00431	0.00986	0.60839	0.02872	0.00515	0.20482	0.14642	1.48064	0	0	0	0	0	0	0.15429	1.04392	0.11297	0	0	0.00161	0	0	0.00121	0.01536	0.03901
Ruminococcus_lactaris	0	0	0	0	0.31397	0	0	1.95978	0	0	0	0	0	0	0.51547	0.37265	0	0	0	0	0.09404	0	0	0	0.56584	0.21784	0.0904	0.10478	0.00205	0.24461	0.22539	0.74284	0	0	0.02851	0.62024	0.49293	0	0	0	0	0	0	0	0	0	0	0	0
Odoribacter_splanchnicus	0.44688	0.15082	0.49504	0.02677	0.01696	0	0	0	0	0	0	0.83054	0.27264	0	0	0	0.3421	0	0	0	0	0	0	0.01384	0.10422	0.44636	1.16363	0.19672	0.02571	0.4534	1.19666	0.98945	0	0	0.04981	0	0	0	0.00539	0.13856	0.1191	0.11691	0	0.07374	0.05649	0	0	0	0.07491
Prevotella_sp_CAG_279	0	0	2.6743	0.13549	0.86596	0	0	0.21477	0	0.10355	0.06047	0	0	0	0	0	1.3033	0	0	0	0	0	0	0	0.47612	0	0	0	0	0	0	0	0	0	0	0	0	0	0	0	0	0	0	0.27371	0.18306	0.97788	0.31014	1.58614	2.66587
Streptococcus_thermophilus	0.00693	2.03901	0.0696	1.44518	0.00719	0.09744	0	0	0	0	3.30713	0	0.04016	0.38093	0	0	0	0	0	1.55682	0	0.47629	0.25031	0.19594	0.21655	0	0.24642	0	0	0	0.00216	0.09094	0	0	0.11488	0.05645	0.07442	0	0	0.06664	0.00279	1.79871	0	0.73067	0.47565	0	0	0	0
Blautia_obeum	0.75452	1.47278	0.26223	0.186	0.00326	0.73832	0	0.27593	0	0	0.09654	0	0	0.04576	0.03646	0.07284	0.59456	0	0	0	0	0	0.36745	0.05474	0.95204	0.01431	0.12312	0.07309	0.2185	0	1.49483	0.11283	0	0	0.04672	0.08002	0.19619	0	0	0.01499	0.0077	0.15441	0	0.02988	0.12379	0	0	0	0
Bacteroides_xylanisolvens	0.00132	0	0.07484	0.05902	0.00512	0	0	0	0	0	0	0	0	0	0.18689	0.17216	0	0	0	0	0	0	0.03131	0	0	0.07895	0.09194	0.01735	0	0.38309	0.32164	0.05503	0	0	0	0.44562	0	6.63977	0.12765	0.43196	0.1303	0.06662	0	0.01412	0.00442	0	0	0	0
Eubacterium_ramulus	0.14907	0.7113	0.36166	0.22335	0.17321	0.02773	0	0.00374	0.16118	0.07205	0.21729	0	0	0	0	0	0	0.711	0	0.85978	0.05341	0	0.01267	0.01198	0.20953	0.17814	0.06123	0.13432	0.13819	0.01162	0.3595	0.08533	0	0	0.7554	0.53566	0.4318	0	0	0.01557	0.05351	0.50719	0	0.00158	0.05289	0	0	0	0
Gemmiger_formicilis	0	0	0.10227	0.02965	0.00947	1.59745	0.00205	0.89752	0.02982	0.04489	0.43611	0	0	0.40057	0.05693	0.08564	0.06568	0.04301	0	0.49847	0	0	0.04477	0.01347	0.15378	0	0.68304	0.11373	1.46755	0.07814	0.1063	0.11974	0	0.01185	0.01778	0	0	0	0	0	0	0.00691	0	0	0	0	0	0	0
Bacteroides_massiliensis	0	0	1.10737	0.46061	0.5554	0	0	0.01536	0.00608	0	0.04147	0.34939	0	0	0	0	0.02169	0	0	0	0	0	0.15376	0.01192	0.01118	0.17639	0.9674	0	0	0	0	1.03588	0	0	0	0	0	0	0	0.03627	0.00872	0.62963	0	0.06135	0	0	0	0	0
Bacteroides_ovatus	0.98909	0.40919	0.42572	0.16266	0.02649	0	0	0	0.18654	0.04153	0.06845	0.26188	0.23232	0	0	0	0	0.00384	0	0.15747	0	0	0.53699	0.01136	0.01561	0.65367	1.14862	0.03816	0.02095	0.11831	0.98135	0.4764	0	0	0	0	0	0	0.23831	0.23956	0.08311	0.08295	0	0.17772	0.01212	0	0	0	0
Firmicutes_bacterium_CAG_170	0	0	0	0	0	0.60424	0	4.78581	0	0	0	0	0	0	0.09923	0.11216	0	0	0	0	0	0	0	0	0.03618	0	0	0.18006	0.28801	0	0	0.00262	0	0	0	0	0	0	0	0	0	0	0	0.04639	0	0	0.00872	0.00422	0.04763
Human_endogenous_retrovirus_K	0	0	0	0	0	0	0	0	0	0	0.04214	0	0	0	0	0	0	0	0	0	0	0.08286	0.03635	0	0	0	0	0	0	0	0	0	2.48779	0.52269	0.09293	0.01884	0	3.15885	0.24	0.09828	0	0	0.19904	0.01375	0	1.23456	0	0	0
Clostridium_innocuum	0.02532	0	0	0	0	0	0.1165	0	0	0	0	0	0	0	0	0	0	0	0	0	0	4.77454	1.56825	0	0	0.03594	0	0	0	0	0	0	0	0.01433	0.07118	0.00365	0.01979	0	0	0	0	0	1.4451	0.00526	0.08582	0	0	0	0
Bacteroides_cellulosilyticus	0.04429	0	0.0815	0.00486	0.01001	0	0	0	0.11351	0.06143	0	0.03512	0.06782	0	0	0	0.1266	0	0	4.35133	0	0	0.2704	0	0	0	0.1742	0.0591	0.03916	0	1.49142	0.68102	0	0	0.01465	0	0	0	0	0.0268	0	0	0	0	0	0	0	0	0
Coprococcus_catus	0.0659	0.17368	0.25195	0.18175	0.05285	0.29575	0.06436	0.00576	0.23932	0.61859	0.14487	0	0	0.30603	0.05103	0.00458	0.01772	0	0	0.07629	0	0	0.00955	0.26709	0.70112	0	0.12396	0.15143	0.22747	0.02407	0.23399	0.33233	0	0	0.23846	0.12333	0.05863	0	0	0	0.06111	0.26162	0	1.47197	0.16372	0	0.00719	0	0
Alcelaphine_gammaherpesvirus_1	0	0	0	0	0	0	0	0.03374	0.01688	0	0.13603	0	0	0	0.03001	0.05565	0	0	0	0	0	0.02972	0.00978	0	0.00593	0	0.00788	0.03099	0.01877	0	0	0	2.6771	0.98431	0.16251	0.00507	0	1.08157	0.45196	0.39658	0.00874	0.00886	0.17848	0.0148	0	0.33213	0	0.52354	0
Clostridium_sp_CAG_58	0	0	0.02885	0.19757	0.0104	0.28231	0	1.40584	0	0	0	0	0	0	0	0	0	0.05082	0.00197	0.24434	0.11857	0	0	0.1933	0.01979	0.14515	0.15063	0.00553	0	0.25895	0.06692	0.0383	0	0	0.46057	0	0	0	0	0	0.00627	0	0	0	0	0	0	0	0
Veillonella_dispar	0.01492	0	0	0	0	0	0	0	0	0	0	0	0	0	0.11229	0.02449	0	0	0	0	0	0	0	0	0.01609	0	0	0	0.01201	0	0.00453	0	4.23026	0.2366	0.25228	0.05785	0.27793	0	0	0	0	0	0.06379	0.02331	0	0	0	0	0
Alistipes_indistinctus	0	0	0	0	0.03799	0	0	0	0	0	0	0.0531	0.17362	0	0	0	0.03487	0	0	0.01141	0.38633	0	0	0.01391	0	0.0895	0.44643	0.13896	0.06402	0.23797	0.07143	0	0	0	0	0	0	0	0	0	0	0	0	0	0	0	0.00654	0	0
Firmicutes_bacterium_CAG_110	0	0	0	0	0.08885	1.41003	0	0.43039	0	0	0	0	0	0.39677	0.33305	0.30617	0.18375	0	0	0	0	0	0	0	0.37873	0	0.04546	0.00402	0.01054	0	0.58191	0.05056	0	0	0	0	0	0	0	0	0	0	0	0	0	0	0	0.08992	0
Paraprevotella_xylaniphila	0.31313	0	0.67191	0.17736	0.23057	0	0	0	0	0	0.01437	0.32929	0.00452	0	0	0	0.42109	0	0	0	0	0	0.0526	0	0.20507	0.20557	0.39323	0	0	0	0.86231	0	0	0	0.03007	0.00141	0.46598	0	0	0	0.00927	0.05558	0	0.02581	0.00252	0	0	0	0
Collinsella_massiliensis	0.05109	0.03174	0	0	0	0.02029	0	0.00252	0.00529	0.00178	0	0	0	0	0	0	0	0.00602	0	0	0	0	0	0.01386	0	0	0	0.00093	0.00703	0	0.01936	0	0	0	0.10311	0.00717	0	0	0	0	0.00644	0.03239	0	0.00298	0	0.18043	0.36251	2.47837	0.95216
Actinomyces_graevenitzii	0	0	0	0	0	0.41807	0.70023	0.16886	0	0	0	0	0	1.36525	0	0	0	0	0	1.2884	0	0	0	0	0.00401	0	0	0.00678	0.03892	0	0	0	0	0	0	0	0.01575	0	0	0	0	0.00811	0	0	0	0	0	0	0
Gordonibacter_pamelaeae	0	0	0.02325	0.00709	0	0.01476	0.58918	0.00463	0.0101	0.02226	0	0.50202	0.07169	0	0	0	0	1.2745	0.15591	0.25956	0.18537	0	0	0.02589	0	0.0544	0	0	0	0	0.0381	0.03214	0.70623	0.06287	0.02836	0.01052	0	0	0	0	0	0	0	0	0	0	0	0.0023	0.01104
Eubacterium_ventriosum	0.97016	0.33661	0	0	0	0.07461	0.00377	0.00339	0	0.03071	0	0	0	0	0.04503	0.03201	0	0	0	0.01683	0	0	0	0.14834	0.08692	0	0.45069	0	0	0.01804	0.49775	0.01178	0	0.05117	0.3459	0.14012	0	0	0	0.17982	0.03549	0.10564	0	0	0	0	0	0	0
Intestinibacter_bartlettii	0.08136	0	0.00339	0.0134	0.05922	0	0	0	0	0	0	0	0	0	0	0	0	0	0	0	0	0	0.1708	0.32208	0.54189	0.00929	0.0429	0.04291	0.05858	0	0.02543	0.03166	0	0	0	0	0.31878	0	0	0.05223	0	0.01055	1.01921	0.75288	0.06432	0	0	0	0
Veillonella_atypica	0.0808	0	0	0	0	0	0	0	0.01757	0	0	0	0	0	0	0	0	0	0	0	0	0	0	0	0.09152	0.01169	0.00271	0.02143	0.00085	0	0	0	1.08585	0.1975	0.57527	0.0841	1.03993	0	0	0	0	0	0	0	0	0	0	0	0
Intestinimonas_butyriciproducens	0	0	1.26031	0.03105	0.06406	0	0.06234	0	0.02462	0.04784	0.18998	0	0	0	0	0	0	0	0	0.10599	1.01719	0	0	0.04734	0	0.01423	0.06992	0.01404	0	0.01315	0	0.01957	0	0	0	0	0	0	0	0.00216	0	0	0	0	0	0	0	0	0
Lactococcus_virus_bIL67	0	0	0	0	0.00341	0	0	0	0	0	0	0	0	0	0	0	0.0217	0	0	0	0	0.18859	0.01551	0.01414	0	0	0.90879	0.1372	0	0.03338	0.00616	0.1295	0	0	0.01529	0.06533	0.5698	0	0	0.05382	0.1347	0	0.10351	0.00758	0	0	0.16501	0.19437	0
Actinomyces_sp_ICM47	0	0	0	0	0	1.05483	0.29655	0.11809	0	0	0	0	0	0	0	0	0	0	0	0	0	0	0	0	0.01551	0.00101	0	0.0127	0.02215	0	0	0	0	0	0	0	0.00405	0	0	0	0	0.04441	0	0.00547	0.02476	0	0	0	0.15194
Haemophilus_parainfluenzae	0	0	0	0	0	0	0	0	0.07986	0	0	0	0	0	0	0	0	0	0	0	0	0.13542	0.01098	0	0.06119	0.00183	0.07062	0.30512	0.20026	0	0.00996	0.06129	0	0.0718	0.13364	0.00469	0.01032	0	0	0	0	0.00635	0.06182	0	0	0	0	0	0
Bilophila_wadsworthia	0	0	0.15328	0.04766	0.12784	0	0	0	0	0.04661	0	0	0	0	0	0	0.12012	0.34014	0.0279	0	0	0	0	0	0.02977	0.02046	0.02025	0.08618	0.00192	0.21855	0.03576	0.0611	0	0	0	0	0	0	0	0	0	0	0	0	0.00663	0	0	0	0
Lawsonibacter_asaccharolyticus	0.00165	0	0.32445	0.12388	0.05663	0	0	0	0.00972	0.01325	0	0	0	0	0.00442	0	0.13354	0	0.02237	0.02401	0	0	0	0.00109	0	0.13374	0.26525	0	0	0.08405	0.0676	0.00399	0	0	0.00272	0.00784	0	0	0	0	0.03315	0.07523	0	0.00053	0.00334	0	0	0	0
Butyricimonas_synergistica	0.0768	0	0.18667	0	0.02168	0	0	0	0	0	0	0.20342	0.06185	0	0	0	0	0	0	0	0	0	0	0	0.00101	0.00833	0.05256	0.00672	0	0.20393	0.25423	0.08561	0	0	0.1692	0	0	0	0	0	0	0	0	0	0.00226	0	0	0	0
Actinomyces_odontolyticus	0	0	0	0	0	0.08472	0.0236	0	0.05598	0.0352	0.08639	0	0	0.17719	0	0	0	0	0	0	0	0.33503	0.00854	0	0.00067	0	0	0	0	0	0	0	0	0	0.03954	0.00319	0.00322	0	0	0	0.00127	0.01162	0	0	0.00377	0	0	0.19037	0.21938
Paraprevotella_clara	0	0	0	0	0	0	0	0	0	0	0	0.01433	0	0	0	0	0	0	0	0	0	0	0.04	0	0.08029	0.14119	0.20496	0	0	0	0.34454	0	0	0	0.01367	0.00279	0.20692	0	0	0	0.00296	0.01097	0	0.01425	0.00107	0	0	0	0
Rothia_mucilaginosa	0	0	0	0	0	0.02214	0.03421	0.00686	0.35099	0.13843	0	0	0	0.05903	0	0	0	0.10707	0	0	0	0.02311	0	0	0.01434	0.00133	0	0.02191	0.04903	0	0.00311	0	0	0	0.08145	0.01527	0	0	0	0	0	0	0	0	0	0	0	0	0
Parasutterella_excrementihominis	0	0	0.10022	0	0.00986	0	0	0	0	0	0	0	0	0	0	0	0.05879	0	0	0	0	0	0	0	0	0.01712	0.02338	0.00881	0.00305	0.01068	0	0.55655	0	0	0	0.02863	0.02842	0	0	0	0.00335	0	0	0	0	0	0	0	0
Holdemania_filiformis	0.01741	0	0	0	0	0.01572	0.19425	0.00728	0	0	0	0	0	0.0184	0	0	0	0.03669	0.02876	0	0	0	0	0.12614	0	0.02192	0.04266	0.00072	0	0	0	0	0	0	0	0	0	0	0.01326	0.0019	0.03821	0.05104	0	0.0036	0	0	0	0	0
Collinsella_stercoris	0.00753	0.00441	0.00165	0.00131	0.00345	0.07234	0	0.01549	0.01945	0.02346	0.0016	0	0.00147	0.01591	0	0	0.02176	0.05732	0	0	0	0	0.00341	0.07826	0.01017	0.00223	0.00053	0.00547	0.02691	0	0.00456	0	0	0	0.00527	0.01094	0.00176	0	0	0	0.01258	0.02737	0	0.01072	0.00486	0.04745	0.02541	0.13427	0.11861
Asaccharobacter_celatus	0	0	0.01451	0	0.00092	0	0	0	0	0	0	0	0.00815	0	0.03216	0.0571	0.03223	0	0	0	0.01514	0	0	0.04635	0.00739	0.00168	0	0.00489	0.00974	0	0.13058	0.02248	0	0	0.02243	0	0	0	0	0.02436	0	0	0	0	0.00703	0	0	0	0
Butyricimonas_virosa	0.01181	0	0.0234	0	0.15728	0	0	0	0	0	0	0.03757	0.00107	0	0	0	0	0	0	0	0	0	0	0	0	0.00279	0.03676	0	0	0.03111	0.04403	0.28349	0	0	0.01363	0	0	0	0	0	0	0	0	0	0	0	0	0	0
Adlercreutzia_equolifaciens	0	0	0.01126	0	0	0	0	0	0	0	0	0	0.00621	0	0.01029	0	0.01048	0	0	0	0.01078	0	0	0.01674	0	0.00095	0	0.0027	0.00368	0	0.14406	0.04125	0	0	0.0291	0	0	0	0	0.01809	0	0	0	0	0	0	0	0	0
Clostridium_bolteae	0	0	0.03888	0.05353	0.00375	0	0.05047	0	0.04091	0.07925	0	0	0.10214	0	0	0	0	0.01102	0.02469	0	0	0	0	0	0	0	0	0	0	0	0	0	0	0.0077	0	0.00856	0	0	0	0	0	0	0	0	0	0	0	0	0
Roseburia_sp_CAG_471	0.02553	0.00935	0.0003	0	0	0	0	0	0	0	0.00428	0	0	0	0	0	0	0	0	0	0	0	0	0.00028	0.00591	0	0	0	0.00067	0	0.0004	0.01554	0	0	0	0.00144	0	0	0	0	0.00186	0.00125	0	0.00365	0	0	0	0	0
[truncated: 7 more columns]

## Sheet: Table_S4
Taxonomic profiles of additional metagenomes included in the study (Franzosa et al. 2019).
Run	SRR6468499	SRR6468500	SRR6468501	SRR6468502	SRR6468503	SRR6468504	SRR6468505	SRR6468506	SRR6468507	SRR6468508	SRR6468509	SRR6468510	SRR6468511	SRR6468512	SRR6468513	SRR6468514	SRR6468515	SRR6468516	SRR6468517	SRR6468518	SRR6468519	SRR6468520	SRR6468521	SRR6468522	SRR6468523	SRR6468524	SRR6468525	SRR6468526	SRR6468527	SRR6468528	SRR6468529	SRR6468530	SRR6468531	SRR6468532	SRR6468533	SRR6468534	SRR6468535	SRR6468536	SRR6468537	SRR6468538	SRR6468539	SRR6468540	SRR6468541	SRR6468542	SRR6468543	SRR6468544	SRR6468545	SRR6468546	SRR6468547
Diagnosis	UC	UC	UC	CD	Control	UC	CD	UC	CD	UC	UC	UC	UC	UC	UC	CD	UC	UC	CD	CD	UC	CD	CD	Control	Control	UC	CD	CD	CD	Control	UC	UC	UC	UC	UC	CD	UC	UC	UC	UC	CD	UC	Control	Control	Control	Control	Control	Control	Control
Faecalibacterium_prausnitzii	12.118	5.67774	0	0	12.2685	30.1306	10.2677	12.8314	1.64309	4.22638	1.06695	1.36658	0	21.1373	18.1233	5.65248	3.34137	6.72235	0	15.5731	3.81627	0	0.00275	7.5071	2.60884	1.50903	0.01036	0.00415	0	5.42344	11.4868	3.57486	1.35346	4.41839	6.42983	3.4038	2.01086	5.60167	16.7918	10.9023	0	6.69237	7.82456	0.36913	5.45372	2.60275	4.79849	7.84507	4.94541
Eubacterium_rectale	13.0805	2.3401	0	0.0079	9.07864	0.02138	2.99917	0.34515	0	0.08096	0.24147	0.11836	0	5.23041	0	0.49381	9.18624	4.88805	0	0.02489	10.3118	2.22085	0.00261	14.2732	0.11852	2.07234	23.3506	0.00418	0.00635	0.08766	0.41679	1.30424	0	3.19851	6.56614	14.8241	0.16391	11.3372	1.67517	3.93064	0	0	5.66436	0.18736	3.30493	0.23575	21.3007	29.6097	0.34794
Bacteroides_vulgatus	5.67493	0.30569	0	0.00768	1.6042	12.0159	11.295	6.67919	0.17102	2.42381	2.70528	4.06732	0	0.00348	18.0497	0.85067	2.26976	0.31385	0.58802	5.77164	0.66911	2.44202	0.00958	11.0225	6.96766	0.15998	0.00977	0.01396	0.02362	8.90678	0.33372	5.00605	0	4.24695	1.42043	0	1.48995	2.75267	11.585	1.3971	0	11.049	0.60381	1.98135	0.02431	0.45106	0.10021	1.81174	0.4059
Bifidobacterium_adolescentis	1.14529	0	0	0	9.32834	0.24696	0	0	45.0811	6.22809	0	0	0	0	0	21.7614	3.49979	15.7837	0.17388	0	14.2643	0	0	0	2.66211	5.25624	0	0	0	2.5112	4.5212	0	16.2156	16.8712	0	0	0	6.66287	2.28862	3.92479	0	0	6.56978	0	10.4895	24.0145	0	0	7.54411
Collinsella_aerofaciens	3.74672	12.8583	0	0	8.01634	0	0.00132	6.84026	0	2.82206	2.45882	4.75433	0	0	0	5.11306	5.06831	0	7.00521	0	9.09238	0.00839	0.00079	3.22793	4.09541	3.10821	11.2689	0.00198	10.2162	2.3858	21.8636	4.2695	19.8835	0	9.27362	0	0	8.49915	6.40259	5.02697	0	7.42227	10.6075	6.222	16.2574	1.93337	11.4028	3.94121	8.60411
Bifidobacterium_longum	1.41683	7.24433	0	0	2.24314	2.05994	0.55147	3.25258	13.8319	2.02506	0.62045	0.00793	3.72792	2.24449	0.0084	4.56829	7.46939	5.68023	0.65715	0.25865	2.02744	0	0	0	0.52105	0.73649	0	3.90683	0	1.46201	7.59785	1.82052	18.2125	13.0987	4.26029	1.53337	0	1.83108	2.58899	1.07381	4.4873	8.9285	0.26445	13.6717	5.35019	15.3945	0.00201	7.03785	0.99044
Ruminococcus_gnavus	0.01273	0.37372	0	26.3002	0.02334	4.26355	0.88969	0.13163	1.04139	0.04631	0.36938	0.12163	0	0	0.37141	0.10036	0.05363	0.01733	10.0609	0	0.02988	1.60419	0	0.01411	0.38279	0.14169	0.97144	13.4657	19.3968	0	0	0.01112	0	3.99244	0.24353	4.77306	0	0	0.01221	0	23.5617	0.57313	0	0	0	0	0.38337	0.1592	15.549
Bacteroides_uniformis	5.8909	0.75242	0	0	2.95509	0	10.7977	10.2462	0	1.56007	0.2663	12.9888	0	0	13.7698	0	0	2.17978	0	0	2.31552	0	0	0.00597	9.00231	0.74833	9.92469	0.72657	6.55064	5.53924	1.11125	4.84963	2.08768	7.25583	7.72596	3.78463	3.54278	2.37021	5.77082	1.42157	0	6.18952	0.46695	1.26174	0.10141	3.57861	0.0309	1.68759	0.69589
Fusicatenibacter_saccharivorans	1.79303	1.23428	0	17.7882	4.92108	6.7963	3.38583	2.84034	6.12267	7.07951	0	0	0	1.92279	0	11.5368	1.96418	6.51145	0.96359	9.72121	1.31697	0	0	0.92708	2.17282	2.25098	0	0	0	2.21742	0.64564	5.89249	0	0	1.23297	21.6079	0.35645	0	1.5014	2.47998	0	9.88622	7.66213	0.93146	3.5491	1.65609	11.2477	6.42508	3.25482
Anaerostipes_hadrus	0.81327	13.3422	0	18.474	3.80525	9.36409	0.29733	1.1467	4.64626	0.73498	0.03862	0.02492	0	2.39894	0.42457	0.53044	1.74482	4.89254	1.13376	3.27091	0.41418	0	0	1.38044	0.49381	2.64123	0	1.9135	0	0.29225	0.92863	6.55924	1.9567	4.71313	4.28815	9.60437	1.65497	0.44106	2.66647	1.92754	0	5.16964	4.77715	6.57193	1.55926	2.04757	5.97469	3.83708	0.12051
Roseburia_faecis	0.00877	0	0	2.36667	3.11574	0	0	4.32992	7.61637	0.25338	0	0.26161	0	2.56761	6.60245	3.16731	0.24415	0.7252	0	3.22314	3.05954	0	0	0.71127	2.06282	0.90421	2.12878	0.44139	0	7.25849	0.56673	0.10719	0.1	2.44178	0.08786	0	0	0	1.24611	16.5782	0	5.31477	6.28104	0.01235	0	1.26386	0	3.84222	13.3957
Blautia_wexlerae	0.42549	0.31487	0	0.00121	4.59732	2.18561	0.10491	0.76049	10.8328	0.08049	0.39907	0.02309	0	0.0645	1.72165	0.72864	0.23769	0.35931	7.76992	0.90717	0.61258	8.60475	0.00074	0.14354	0.01913	0.41954	0.02365	21.1689	0	0.61615	0.69718	0.05781	0.11181	7.80573	0.67646	0.01714	0	1.67672	0.32682	0.1108	0	13.4928	0.54039	0.07529	1.13111	0.1864	3.22027	0.65333	0.16228
Ruminococcus_bromii	0	0	0	0	0	0	0	0	0	11.2163	0	0	0	5.58699	0	18.1482	18.4581	0	0	7.13733	8.60789	0	0	10.1688	8.5445	8.18004	1.92206	0	0	5.02109	0	11.5928	0	0	3.98764	0	0	0.48905	0	0	0	0	0	6.41186	13.9057	0	6.92702	0	15.9159
Prevotella_copri	0	0	0	0	0	0	0	0	0	0.01025	23.3374	0	0	0	0	0	0	0	1.16821	0	0	0	0	0.00129	0.00307	0	0.00266	0	0.14166	0	0	0	0	0	0	0	0	7.27461	0	7.00101	0	0	1.53731	0	0.45711	0	0	0	0
Akkermansia_muciniphila	0	0	0	0	1.32871	0	0	0.01126	0	4.35889	0	0.02963	0	0.01703	0	1.11654	0	0	0	2.62067	0.72642	0	0	3.30329	12.2911	42.1151	0	0.49942	6.76955	1.4977	0	27.7319	0	1.62306	1.71076	0	10.5192	0	0	0	31.6116	0	0	13.9646	0.08867	5.91587	0	0	0
Escherichia_coli	0	0	4.19739	1.64346	0.00933	1.33821	0	0.03252	0.22558	0.31751	0	6.55102	4.16411	0	1.37744	0	0	0	0.0036	0	0	0	0	0.01864	0.00219	0.06992	0.05181	2.83566	0.21934	0.00327	0	0	0	0	0	0	0.09031	0.60809	0	0.00832	1.54215	0	0	1.03746	0	0.03226	0.05528	0.01027	3.14921
Dorea_longicatena	1.95757	0	0	0	2.78862	0	2.41645	0.02996	0	0.41577	1.00661	0	0	0.97798	0	2.43956	4.09167	4.33979	12.8919	5.06718	1.44997	13.281	0	0.77778	2.12614	1.97332	0	0	0	1.35916	1.53512	0.75718	0	0	2.02856	8.23277	3.86688	0.88773	2.69837	1.85006	0	0	8.32331	1.65274	3.05508	4.81832	6.09407	6.01943	1.37045
Alistipes_putredinis	0	2.29317	0	0	0.82345	0	9.10372	6.28971	0	5.53299	1.15156	5.54812	0	0	0	0	3.63327	0	0	0	1.01549	3.50051	0	2.3153	9.09787	0.70502	0	0	0	10.1954	1.6737	1.11451	0	0	1.81517	0	4.17452	1.32885	0	0	0	0	1.35464	1.92026	0.74876	1.17435	0	0.59152	1.36895
Eubacterium_hallii	0.90443	1.8787	0	0	2.84921	0.92367	0.7238	0.44943	0	1.45296	0.17845	0.06352	0	0.31354	0	1.59814	2.27095	2.41607	3.05833	0.22373	1.32792	0	0	1.0545	0.82924	2.92414	0.88639	0	0	0.72134	3.91521	1.63461	0.45615	2.96011	2.27718	3.01274	0.51891	2.2095	1.50277	0.82691	0	0	5.47539	4.04439	3.48558	3.48496	2.33699	4.83613	0.3871
Bacteroides_dorei	3.261	0.88026	0	0	0.04123	0	0	0	0	0	0	4.71276	0	6.90716	0	0	0	7.51259	0.08084	0	0	0.34637	0.00042	0.00156	0.00227	0	17.4333	2.89979	5.9127	0	0	0	0	0	2.85871	0	0.25668	1.24361	0	0	0	0	0	3.40608	0.03773	0.27814	0	0.05141	0
Blautia_sp_CAG_257	0	0.09778	0	0	0.00941	0	0	0	0	0.08466	0.00816	0	0	0.01719	0.07654	0.00869	0.26562	0.01809	5.14262	0.1908	0	2.50553	0	0.00282	0	0.00096	0.56154	1.1016	0	0	0.02344	0.0441	0.01106	0.23297	0.11155	0.08772	0	0	0	0	0	0.14991	0	0	0	0	0.00508	0	0
Parabacteroides_distasonis	0	0	0	0	0.15107	1.03076	3.1446	0.93377	0	3.28749	0.8522	0.25946	32.7321	4.23339	1.99655	0	1.05699	0	0.16754	0	0.05929	0.5574	0	0	0.28131	0.00733	0	0.21206	2.62807	1.31816	0.27825	0.10395	1.71003	0.70313	1.01034	0	1.067	1.26261	1.07287	0.48457	0	0	0.15419	0.20229	0.03156	0.11298	0	0.04394	0.2031
Bifidobacterium_bifidum	1.64699	0	0	0	0	0.92431	0	0	3.784	6.41996	0	1.71716	0	0	0	0.19645	3.13919	4.37621	0	0	1.07138	22.9872	0	0	2.56342	0	1.39836	0	0	1.59238	0	0	10.3319	6.4126	3.77098	0	0	2.91697	0	1.92535	0	0	0	0	0	2.69671	0	0	0
Ruminococcus_torques	1.06067	6.15046	0	0	2.57672	5.93271	2.71191	0	0	0.42898	0.01306	0.02723	0	0.46348	0	0	0.88005	0	0	2.38641	0.68117	3.55837	0	1.26693	1.38704	0.97604	0	0	0	0.74169	0.20824	0.98124	2.87021	0	9.83521	0	2.81461	1.02015	0.01473	0.93831	0	0	5.98608	0.10773	1.76156	0.70288	0.00218	1.00422	1.04154
Coprococcus_comes	2.39269	0	0	0	1.54435	0	1.11609	0.95896	0	0.90128	0	1.15959	0	0	0.61156	0.22426	0	0.63306	0.12059	3.09873	0.11059	0	0	0.56243	1.16711	1.97839	0	12.6868	6.52258	1.12274	0.01938	0.70563	1.19324	0.72084	2.82516	0	1.84663	1.96474	4.98234	1.76758	0	0	4.48889	0.08839	2.30619	0.56478	3.72653	3.05062	1.0044
Blautia_obeum	2.11666	7.38753	0	0	5.52745	0	0.16564	0.24236	0	1.34257	0.07609	2.41695	0	1.22704	0	3.9506	3.72999	0.68196	1.75839	0.52786	0.26806	0	0	3.15611	1.041	2.07283	1.39351	0	0	0.65576	2.45385	2.99317	0.96279	0	1.73396	3.38012	1.50315	2.54383	1.16605	0.91673	0	0	3.17333	0.26688	1.86359	0.69611	5.36909	1.92748	0.46157
Streptococcus_thermophilus	0.29349	1.16761	0.06372	0	0	0	0.33297	0	0	0.54766	0	0.00681	0	1.24968	0.03763	0.00288	0.33123	0	1.81641	0.81794	0.44419	0.56892	0.12766	0	0.15722	0.0104	0.38679	0.12935	0	0.26102	0.43864	0.04382	0.09153	2.20001	0.02144	0	0.27427	0	0.09367	0.91305	0	2.66841	0.13674	0.3086	0	0.07009	3.61187	0.02443	0
Roseburia_intestinalis	3.51483	1.02085	0	0.00367	0.12663	0	0	0.03298	0	0.01089	0	0.02824	0	1.44743	5.2626	0	0.11689	1.54438	0	0.02754	0.34658	0.35931	0	0.23597	0.11575	0.00117	3.13331	1.8401	0	0.47435	0.01605	0.12735	0.11346	0	0	3.2328	0	0	0.03351	0	0	1.32522	1.10214	0.05407	0	0.03336	0.31891	0	0.17703
Bacteroides_stercoris	5.35599	0	0	0	0.27694	0	16.1227	0	0.00192	0	0.19973	0.44221	0	0	0	0	0	2.54167	0.15404	0	0.89043	0	0	0.0006	3.62408	0.03372	0	0	0	0	0.20577	0.02532	0	0	0	0	0	0	14.5946	0	0	0	0	0	0	0	0	0	0.67344
Streptococcus_salivarius	1.0171	0.14787	27.5717	0.25778	0.45657	2.16432	0.00285	0.17213	0.04482	0.01296	0	6.07865	2.56931	0.13761	0.09092	0.02104	0.07338	1.84659	8.76675	1.31919	7.11858	0.11808	0.00292	0.46883	0.0091	0.15222	0.7448	0.14931	0.01029	2.88357	0.01557	0.42857	2.03954	0.07691	0.23737	0.14431	0	3.94132	0.01518	0.97567	0.00223	0.11981	1.28199	0	0.09382	0.01868	0.6785	0.06881	0.02744
Ruminococcus_bicirculans	5.212	8.35792	0	0	2.5956	0	0	0.75207	0	1.2357	0	7.78381	0	0.00809	0	4.7262	1.91334	4.41602	0	11.1295	2.66581	0	0	3.87	0.72523	0.00392	0	0	0	1.97126	0	0.90524	1.17067	0	0	0	0	0	0.10454	0	0	1.25431	0	1.09968	0	1.20318	3.89362	1.11786	0.94982
Flavonifractor_plautii	0.00723	0.22803	0	2.10484	0.03509	0	0.5827	0.03086	0.07112	0.88487	0.17542	0.03842	0	0.22962	0.26766	0.01313	0.83644	1.71171	0.26933	0.03282	0.0173	1.93319	0	0.27059	0.25506	0.10337	0.74518	0.01372	2.30078	0.01084	0.01918	0.31401	0.08787	0.96766	0.53879	0.05124	0	0.06002	0.3867	0.00925	0.50822	0.52794	0	0.88652	0	0	0.02406	0	0.01814
Eubacterium_eligens	0.47841	0.32497	0	0	0.06323	1.28986	0	0.52205	0.07974	1.0748	0	3.32609	18.7397	2.9801	0	0.1226	0	1.74124	0	0.10687	0.03752	0	0	0.73354	0.01282	0.0021	0	0	0	0.70518	0.30796	0.21308	0.34722	0	0.60934	1.09648	0.83195	0.21851	0.46259	9.28211	0	3.22924	0.16774	0	0.02246	0.03657	0.04571	0.02111	0.0229
Bacteroides_caccae	0.27478	0.11649	0	0	0.03807	0	0.36942	0.42733	0	0.56117	0	2.13319	0	0	0	0	0	0.89382	0	0	0.14385	0	0	0	1.33455	0.22465	0	0.61903	0	0.311	0.13488	0.77895	0	0.3176	1.02571	0	0.72656	1.27074	0.78761	0.44197	0	0	0.33567	4.04061	0.00864	0.12768	0	0.05352	1.33901
Roseburia_inulinivorans	3.24457	0.03144	0	0	1.27666	5.05926	0	0.06222	0	0	0	0.00282	0	0.13707	0	0.13318	0.01425	1.12552	0	0.24692	0.47054	0	0	0.21298	0.255	0.05282	0	0	0	0.29271	0.0929	0.08794	0	0	0.9439	0.15195	0	4.17195	0.2915	0.55326	0	0.18496	0.16575	0.16589	0.14597	0.11684	0.03685	0.22331	0.01553
Bacteroides_ovatus	0.05343	0.15087	0	0	0	0.61014	0	0.23343	0.02472	0.39283	0.43484	0	0.03553	0.22139	4.75845	0.517	0.03092	0.90007	0	0	0.05702	0.37737	0	0.30278	0.44721	0	0.00111	0.2726	1.05171	0	0.00556	0.15696	0.38001	0.73688	0	2.79365	0.03716	0	0.06572	0	0	0	0.05257	0.64177	0.02463	0.0802	0.08481	0.40082	0.15385
Bacteroides_fragilis	0.1574	0	0	0	0	1.53354	0	0	0	0	1.8316	0	0	0.4778	4.49487	0	0.00069	0	0.2502	0	0	0	0	0	0	5.82142	0.00042	0	0.94424	0.11626	0	0	0	0.18662	0	3.58731	0	0.02248	0.1759	0	0	1.63755	0.15772	0	0	0	0	0.06412	0.12902
Eubacterium_siraeum	0.01296	0.02898	0	0	0	0	0	1.73814	0	0.06346	0	0	0	3.74086	0	0	0.00037	0.02814	0	0	0	0	0	6.58169	0.00323	0.64049	0.94244	0	0	0.00388	4.31555	0	0	0	0.08892	0	6.11166	1.41604	0	3.36099	0	0.22696	0	0.09975	0.03925	0.45478	0	0.25231	0.7399
Parabacteroides_merdae	1.42222	0.48021	0	0	0.09299	0	0.94016	0.00115	0	2.04936	0	0.11223	0	0	0	0	0.10348	0	0.00573	0	0.3849	1.00461	0	1.59391	1.14425	0	0	0	0	0	0.01	0.5485	0	0.69713	0.73781	0	0	0.36065	0	1.04854	0	0	0	0.63624	0.15799	0	0	0	0.39286
Dorea_formicigenerans	0.29685	1.11887	0	0	0.73763	0	0.46633	0.16226	1.18463	0.26446	0.62285	0.24631	0	0.53562	0	0.89112	2.30154	2.18975	3.4812	0.10947	0.58213	0	0	0.56673	0.29724	0.23683	0	1.57912	0	0.40897	1.42512	0.3803	0.0483	1.11698	1.87088	2.48878	0.61214	1.16272	0.23718	0.56158	0	0.44156	1.93724	0.12267	1.71715	0.86454	0.69885	1.27065	0.55437
Erysipelatoclostridium_ramosum	0	0	0	0.14766	0	0.13313	0	0	0.0047	0	0	0	7.2811	0	0.23806	0	0	0	0.98675	0	0	0.45281	0	0	0	0	0.05025	6.64129	0.3263	0	0	0.00663	0	0.00642	0	1.08508	0	0	0	0	9.31553	0.14891	0	0	0	0	0	0	0.01148
Bacteroides_thetaiotaomicron	0	0.00853	0	0	0	1.15055	2.06257	0.70211	0	0.01241	1.1767	0.419	0	0	0	0	0.01982	0	0.07968	2.04893	0	0	0	0	0	0.00845	3.06102	0.19784	0	0.22171	0	0.04269	0.70973	0.53665	0.45767	0	0	0.63137	1.33747	0.15294	0	0	0.11222	0.26025	0.01336	0	0	0.2969	0.17568
Eggerthella_lenta	0.03097	0.50152	0	1.3356	0.00763	0	0.08473	0.03403	0.22413	1.08259	0.00959	0.02993	0	0.03919	0.97737	0.02047	0.2178	3.08339	0.01155	5.27498	0.01334	3.5909	0	0.02734	0.11114	0.04533	0.29732	6.95539	0.41383	0	0.0439	0	0.88913	2.39271	0.68155	1.69232	0	0	0	0	0	0.26738	0	0.08641	0	0.01914	0.01398	0.01741	0.00999
Alistipes_finegoldii	0	0.6454	0	0	0.01972	0	0.00448	5.60724	0	0	0	0.50316	0	6.92546	0	0	1.58488	0	0.02055	0	0.3163	0.12973	0	0.44568	1.65816	0.87603	0	0.00261	0	0.74567	0.63153	0.03208	0.6638	0.74087	0.86011	0	0.35362	0.50278	0	0	0	0	0.09997	0.09969	0.00619	0.12765	0.08142	0.09386	0.00666
Dorea_sp_CAG_317	0	0.23587	0	0	0	0	0	0.68932	0	0.56221	0	0.63595	0	0.03665	0.79791	0	0.0232	0	0	0.14128	0	0	0	0.01057	0.01991	0	0.31149	4.29188	0	0	0	0	0	0.54726	0	0	0	0	0	0	0	0	0	0	0	0	0	0	0
Clostridium_clostridioforme	0	0	0	4.25908	0	0	0	0	0.06564	0.00236	0	0	0.27075	0	0.69792	0	0	0	0	0	0	0	0	0.00102	0.00274	0	0.05572	0.07496	0.11931	0	0	0	0	0	0	0	0	0	0	0	6.00127	0.04495	0	0	0	0	0	0	0
Ruthenibacterium_lactatiformans	0.05764	0.94043	0	0.30405	0.09848	0	0.13811	0.0233	0	0.337	0.01484	0.68722	0	0.07066	0.19942	0.00951	0.03839	0.05771	0.01912	0.25014	0.00718	1.01854	0	0.22942	0.30486	0.34355	0.3438	0.38957	1.00885	0.20696	0.43331	0.61644	0.52344	0.22031	0.42951	0.00386	0.82271	0.40397	0	0.02177	0.39253	0.1786	0.04564	2.09873	0.06749	0.02089	0.04772	0.05241	0.07752
Agathobaculum_butyriciproducens	0.61282	1.66019	0	0	0.91274	0	0.25695	0.24555	0	0	0.26175	0.47829	0	0.77475	0.05893	0.60282	0.30789	0.96816	1.17222	1.17396	0.19836	0	0	0.17091	0.0144	0.13717	0.69078	0.05423	0	0.81264	0.58734	0.22055	0	0.42281	1.80817	0	0.1396	0.58248	0.45083	0.14526	0	0.24945	0.91266	0.039	0.55918	0.47953	0.36428	0.88897	0.14286
Veillonella_parvula	0.01821	0	8.55106	0.13159	0	0.0256	0	0	0.00536	0	0.00359	0	0	0	0.0028	0	0	0.9066	0	0	0.02744	0	0	0	0	0	0.06876	0	0	0.01428	0	0	0	0	0	0	0	0	0	0	1.55517	0	0	0	0	0	0	0	0
Lachnospira_pectinoschiza	0	0	0	3.32941	0.09334	0	0	0.35268	0.3589	0.44152	0	0	0	1.00717	1.61149	0	0.31669	0	0	0	0.09525	0	0	0.58255	0.25454	0	0.18596	0	0	0.12444	0	0	0.761	0	0	0.98541	0.25945	0	0	1.00404	0	0.27717	0	0	0	0.03241	0	0	0
Blautia_hansenii	0	0	0	0	0	0	0	0	0	0	0	0	0	0	0	0	0	0	5.45668	0	0	0	0	0	0	0	0.04131	0	0.33424	0	0	0	0	0.00239	0	0	0	0	0	0	10.9785	0	0	0	0	0	0	0	0
Streptococcus_parasanguinis	0.73479	0.37322	7.66917	0.1445	0.2425	0.34168	0.0133	0.06874	0.01186	0	0	0.63313	2.85425	0.02053	0	0	0.01092	0.87937	2.37537	0.5544	2.59932	0.1411	0.62569	0.04574	0.00079	0.03101	0.15777	0.03873	0.01623	0.65135	0	0.01541	0.0494	0.03274	0.03516	0.04687	0	1.40929	0	0.05507	0.27337	0.15986	0.25124	0	0.11962	0	0.08455	0	0.00767
Dialister_invisus	0	0	0	1.33783	0.88831	0.12256	0	0	0.15971	0	0.2892	0	0	0.14502	0.49927	0	0	0.45404	0	0.52512	0	0.28986	0	0.22382	0	0	0.58191	0.00257	2.66033	0.33207	1.41504	0	0.14178	0.34635	0	0.2995	0	0	0.1188	0	0	0.27414	0.26681	0	0	0	0	2.14225	0
Firmicutes_bacterium_CAG_94	0.42967	0.74666	0	0	0	0	0	0.01995	0	0.03475	0	0.44403	0	0.11797	0	0.21298	0.99804	0.97499	0	0.35218	0.29498	0	0	0.01086	0.44437	0.16584	0.23923	0	0	0	0.54625	0.07498	0	1.48102	0.0197	0	0.19756	0.16146	0	0	0.13175	0.20195	0	1.12584	0	1.12901	0.09206	0	0.33753
Barnesiella_intestinihominis	0.85336	0.17206	0	0	0.09246	0	2.06727	0	0	0	0.54095	3.17223	0	0	0	0	1.83094	0	0.13263	0	0	0	0	0.67125	3.15889	0.22934	0	0	0	1.36903	0.07058	0.50566	0	0	0.3601	0	1.93927	1.9451	0	0.41325	0	2.5456	0.12233	1.43515	0.01724	0.16975	0	0.0049	0.75144
Ruminococcus_lactaris	0.56476	0	0	0	0	0.18102	1.15203	0.2323	0	0	0	0	0	1.31494	0	0.26077	0	0.23403	0	0.58136	0.23812	0	0	0	0	0	0.11497	0	0	0.43942	0	0.24304	0	0	0.11413	0	0.67589	2.59376	0.50664	0.03429	0	0	0.27241	0.08273	0.40732	0	0	0	0.12734
Veillonella_atypica	0.01293	0	2.07951	0.56817	0	1.22063	0	0	0	0	0	0	0	0	0.05612	0	0	0.32898	0	0	0.00539	0	0	0	0	0	0.06102	0	0	0.03378	0	0	0	0	0	0	0	0	0	0	0	0	0	0	0	0	0	0	0
Cyprinid_herpesvirus_3	0	0	0	0.0136	0	1.41692	0.00877	0	0	0	0.06599	0	0	0	0.10405	0	0	0	0	0	0	0.01202	0	0	0.02071	0	0	0	0	0	0	0	0	0	0	0	0	0.0237	0.05741	0	0	0	0	0	0	0	0	0	0
Gordonibacter_pamelaeae	0.47438	1.85893	0	0.22723	0.00093	0	0.06259	0.03301	0.03593	0.58219	0.01582	0.02799	0	0.17047	0.16768	0.41737	0.26783	0.52223	0	1.75511	0.02043	0.67434	0	0.06726	0.03744	0.23889	0.07729	1.2448	0.12229	0.39258	0.04037	0.00039	0.66701	0.95688	1.12638	0.32759	0.09186	0	0	0	0	0.04434	0.05324	0.05165	0.02151	0.05264	0.31457	0.09787	0.00917
Clostridium_innocuum	0	0	0	0.46228	0	0	0.03575	0	0.07145	0.00984	0	0.16775	0	0.0022	0.02995	0	0	0.0152	0.13027	0	0	0.34193	0	0.00991	0.01947	0.02783	0.05037	1.62592	0.82791	0	0.03661	0	0.08601	0.02095	0.12728	0.04428	0	0.5174	0.01832	0	2.87817	0.03878	0.00416	0	0	0	0	0	0
Eubacterium_ramulus	0.26101	0.36124	0	0	0.16326	0	0.25022	0.06155	0	0.16419	0	0	0	0	0	0.23476	0.20347	0	1.56869	0.62219	0	0	0	0.04378	0.00336	0.25838	0	0	0	0.04525	0.07032	0	0.12848	0	2.90845	2.15603	0	0	2.16354	0.45444	0	0	0.62646	0	0.15007	0.01606	0.82428	0.49656	0.00599
Firmicutes_bacterium_CAG_83	0	2.62342	0	0	0.13232	0	0.3157	0.47866	0	0.42854	0.1468	0.79393	0	0	0	0.48933	0	0	0	0	0	0	0	3.57495	3.63723	0.59538	0	2.64042	0	0	3.20254	0.00439	2.48602	0	0.13265	0	0.22263	0.41402	1.34057	0.71315	0	0	0.07714	0.02029	0.0324	0	0	0.01841	0.47705
Asaccharobacter_celatus	0.36531	0.4203	0	0	0.023	0	0.33895	0.17393	0	0.15252	0.00683	0.05139	0	0.80048	0	0.31918	0.28744	0.06493	0	0.00544	0.03375	0.00044	0	0.36619	0.6974	0.58888	0	0.1369	0	0.45712	0.84717	0.31498	0	0	0.11174	0	0.28318	0	0	0.00708	0	0	0.75727	0.01747	0.25357	0.48854	0.92522	0.3575	0.23952
Monoglobus_pectinilyticus	0	0	0	0	0	0	0	0.29844	0	0.05989	0	1.44107	0	0.92888	0.03373	0.2077	0.26556	0	0	1.599	0.58941	0	0	0.40594	0.30102	0	3.4871	1.01362	0	0.69775	0.29678	0.57904	0	0	0	0	0	0	0	0	0	0	0	0	0	0	0	0	0
Roseburia_hominis	1.03548	0.73898	0	0	0.46501	0.02601	0	0.04123	0	1.52141	0	0	0	0.48383	0	0.02749	0	0.01175	0	0.51318	0.06282	0	0	0.80626	0.04001	0.21952	0	0	0	0.43844	0.55735	0.05475	0	0	0.06243	0	0.14842	0	0.09642	0	0	0	0.29657	0.11735	0.01512	0.10062	0	0.74113	0.01823
Parasutterella_excrementihominis	0	0	0	0	0	0	2.11334	0	0	0	0.11396	0	0	0.17567	0	0.0662	0.19455	0	0	0	0	0.0293	0	1.11834	0.07335	0	1.38261	0	1.6282	0.43851	0	0	0	0	0.00884	0	0.33455	0	0	0	0	0.1684	0	0	0	0	0	0	0
Haemophilus_parainfluenzae	0	0	13.8809	0.02025	0	0.84225	0	0	0	0	0.06429	0	0.00175	0	0	0	0	0	0	0	0.13068	0	0	0	0	0	0.02697	0	0	0.07801	0	0	0	0	0	0	0	0	0	0	0	0	0	0	0	0	0	0	0
Coprococcus_catus	0.65276	1.26263	0	0	0	0	0.04696	0.2887	0	0	0.0021	0.13334	0	0	0	0.71621	0	0	0	0	0.11052	0	0	0.44195	0.54268	0.23076	0	0	0	0.33112	0.15592	0	2.88765	0	0	0	0.36841	1.19712	1.57615	0.70783	0	0	0.89611	1.05916	0.73446	0.93493	0.40651	0.88895	0.44139
Oscillibacter_sp_57_20	0.11449	0	0	0	0	0	0.62115	0	0	0	0.22435	0.465	0	0	0	0	0	0	0	0.00119	0	0	0	0	1.22746	0.11305	0	0.07026	0	1.81074	0	0	0	0	0	0	0.12295	0.35307	3.37489	0.41113	0	0	0	0	0	0.43531	0	0.14667	0.39434
Bacteroides_cellulosilyticus	0.27563	0.24595	0	0	0.00873	0	0	0	0	0.43977	0	0.00842	0	0	0	0	0	0.12307	0	0	0.02951	0	0	0.9392	0	0	0	0	0	3.178	0.04084	0	0	0	0	0	0	0.03477	0	0	0	0	0	0	0	0	0	0	0
Collinsella_intestinalis	0.01029	0.01028	0	0	0.04364	0	2.27465	0.00615	0	0.006	0.07268	0.00918	0	0	0	0.00113	0.51455	0	1.8128	0	0.00857	11.0669	0	0.00363	0.00748	0.00452	0.01491	0	0.02017	0.00367	0.20497	0.00223	0.55995	0	0.01301	0	0	0.02689	0.01575	0	0	0.00991	0.02049	0.00471	0.05721	0.01882	0.01609	0.02074	0.04109
Eubacterium_sp_CAG_38	0	0	0	0	0	0	0	0.07929	0	0.08529	0	0	0	0.03101	0	0.6806	0.07674	0	0	0.29495	0.09005	0	0	0.00173	0.0164	0.05007	0	0	0	0.05942	0	0.01646	0	0.68979	0.18652	0	0	0	0	0	0	1.84778	0	0.13949	0	0.06907	0	0.63603	0
Eisenbergiella_massiliensis	0	0	0	0	0	0	0.10667	0	0	0.05087	0	0.13985	0	0.04742	0	0	0	0	0	0.20145	0	0	0	0.00864	0.00311	0.00116	0.36618	0.10762	0.03272	0	0	0.00451	0.49456	0	0	0.13704	0	0	0	0	0	0	0	0	0	0	0	0	0
Adlercreutzia_equolifaciens	0.12923	0.32693	0	0	0.06075	0	0.09192	0.06635	0	0.06115	0.00797	0.0312	0	0.3496	0	0.1319	0.15945	0.02196	0	0.00706	0.02789	0.00251	0	0.19605	0.38395	0.2965	0.00021	0.07422	0	0.4088	0.92221	0.15156	0	0	0.032	0	0.13905	0	0	0.01562	0	0	0.55096	0.02647	0.09818	0.14668	0.25638	0.17034	0.17468
Clostridium_symbiosum	0	0	0	3.78403	0	0	0	0	0	0.07602	0.00137	0	0	0	1.08481	0	0.00407	0.07702	0	0	0	0.00659	0	0.00444	0.0035	0.0369	0.01719	0.39458	0.15785	0	0	0.02776	0.00626	0	0	0	0	0	0	0	0	0.13833	0	0	0	0	0	0	0
Oscillibacter_sp_CAG_241	0.12535	0	0	0	0.02837	0	0	0	0	0.00064	0	0.08412	0	0.44746	0	0	0	0	0	0	0.00368	0	0	0.00013	0.00091	0	0	0	0	0.1675	0	1.21302	0	0	0	0	1.11536	0.49768	0	0	0	0	0	1.16547	0.00122	0.62538	0.10015	0.10647	0.00119
Blautia_producta	0	0	0	6.35055	0	0	0	0	0	0	0	0	0	0	0.023	0.0068	0.01168	0.06612	0.0345	0	0	0.02459	0	0	0	0	0.02766	0.017	0	0	0	0	0	0.4642	0	0.12778	0	0	0	0	0	0	0	0	0	0	0	0	0
Odoribacter_splanchnicus	0.18328	0	0	0	0	0	0.93188	0.52648	0	0.20268	0.26302	0.41377	0	0	0	0	0.14181	0	0	0	0.10446	0.04698	0	0.28839	0.69713	0.00435	0	0.03649	0.09998	0.25453	0.01482	0.23363	0	0.26169	0.18153	0	1.06118	0.21152	0	0.15517	0	0	0.04357	0.21023	0	0.0079	0	0	0.0038
Sellimonas_intestinalis	0.06928	0.24498	0	0	0	0	0	0	0	0.04049	0.0047	0	0	0.29967	0	0.02855	0	0	0	0.00963	0	0.22471	0	0	0.01599	0	0.27821	0	0	0	0	0	0	0.41704	0	0.00956	0	0	0	0	0.78485	0.07905	0	0	0	0	0	0	0
Clostridium_leptum	0.00524	0	0	0	0.02327	0	0	0.35063	0	4.50575	0.00407	0.00852	0	0	0	0.00962	0.03841	0.03305	0	0.23837	0	0.11621	0	0.0374	0.08924	0.01645	0.19499	0.17361	0.20961	0.07208	0.49874	0.00789	0.5608	0.33727	0.01151	0	0.00206	0	0	0	0	0.59681	0	0.02899	0.04554	0	0.00203	0	0.01179
Bacteroides_xylanisolvens	0.38465	0	0	0	0.08324	0	2.58962	0	0	0	0	0	0	0.12069	0	0	0	0	0.00215	2.09118	0	0	0	0.00108	0	0.18052	0	0	0	0.40299	0.00954	0	0	0	0.21436	0	0	0.08334	0.86782	0.09977	0	0	0.03508	0.00137	0	0	0	0	0.01474
Intestinibacter_bartlettii	0.67361	0.00615	0	0.56484	0	0	0	0	0.02946	0.06687	0	0	0.03101	0	0	0.02071	0.1627	0.00814	0	0.0664	0.05752	0.24854	0	0.02934	0.07565	0.00413	0.08622	0.86067	0.13545	0.03852	0.88091	0	0.20813	0.05169	0.05208	0	0	0	0.0078	0.11217	0	0	0.10016	0.20016	0	0	0.43814	0.03635	0.13817
Phascolarctobacterium_faecium	0	0	0	0	0	0	0.02318	0	0	0.4051	0.02629	0.5325	0	0	0	0	0.27835	0	0	0	0	0	0	0.18468	0	0.28902	0	0.97098	0	0.05808	0.03316	0	0	0	0	0	0	0	0	0	0	0	0	0	0	0	0	0	0
Proteobacteria_bacterium_CAG_139	0	0	0	0	0	0	0.16414	0	0	0	1.19789	0	0	2.31419	0	0	0.28495	0	0	0	0	0	0	0.26222	0.79026	0	0.10668	0	0.13328	0.13349	0	0	0	0	0	0	0	0	0	0	0	0.73923	0.04344	0	0	0	0	0	0
Clostridium_bolteae	0	0.01097	0	0.04844	0	0	0.00951	0	0	0.01148	0.0115	0	0	0.0041	0.05488	0	0.00635	0	0.01886	0	0	0.00072	0	0.00206	0.00151	0.0087	0.0411	0.04842	3.58709	0	0	0	0	0	0	0.00702	0	0	0	0	0	0.05926	0	0	0	0	0	0	0
Clostridium_sp_CAG_58	0	0	0	0	0	0	0	0.06382	0	0	0.07065	0	0	0.27999	0	0.20918	0.22749	0	0.25551	0.14006	0	0.26416	0	0	0.04405	0	0	1.44433	1.62303	0.04263	0.12674	0.01149	0	0	0	0	0	0	0	0	0	0.34603	0	0	0	0	0	0.12388	0.07182
Gemmiger_formicilis	0.43451	0	0	0	0.30575	0	0	0	0	0	0	0	0	0.19965	0	0	0	0	0	0.21365	0.19266	0	0	0.11384	0.15409	0.0057	0	0	0	0.586	0	0.09826	0	0	0.15876	0	0.15194	0.02321	0.36574	0	0	0	0.10199	0.16561	1.39016	0.94398	0.20611	0.1133	0.0536
Slackia_isoflavoniconvertens	0	0	0	0	0.00595	0.12368	0	0	0	0	0	0	0	0	0	0.40104	0	0.00145	0.00348	0	0.0021	0	0	0	1.23835	0	0	0	0	0	0	0.00763	0	0	0	0	3.3996	0.31694	0.76797	0.47376	0	0	3.01033	0.00499	1.70599	0	0	0	0.45243
Collinsella_stercoris	0.06019	0.16465	0	0	0.47226	0	0.2191	0.08099	0	0.04155	0.07394	0.0905	0	0	0	0.09021	0.09221	0	6.39799	0	0.10946	0.36644	0	0.06296	0.08812	0.02561	0.12224	0	0.09744	0.04034	0.369	0.04246	0.0916	0	0.09762	0	0.00986	0.18083	0.06555	0.03404	0	0.06639	0.11464	0.10796	0.23635	0.06289	0.07575	0.02012	0.12859
Eubacterium_ventriosum	0.11679	0.35087	0	0	0.30451	0	0	0.27232	0	0	0.12749	0.00659	0	0.13623	0	0	0.11571	0	0.73889	0.9763	0.12143	0	0	0.17778	0.0645	0	0	0	0	0.13126	1.51948	0.05521	0	0.55963	0.09245	0	0.05551	0	0	0	0	0	0.48586	0.01377	0.1831	0.02466	0.21153	0	0.0098
Alistipes_shahii	0	0	0	0	0.05323	0	0.13378	1.48217	0	0.09289	0.00564	0.08023	0	0	0	0	0.08166	0	0	0	0	0	0	1.30564	0	0.019	0	0.06065	0	0.21346	0.01134	0.08091	0	0	0.10667	0	0.56518	0.04559	0	0.11351	0	0	0.00675	0.16259	0	0.10344	0	0.00385	0.02605
Blautia_hydrogenotrophica	0	1.41386	0	0	0.06608	0	0	0	0	0	0	0.05357	0	0	0	0	0.83521	0	0	0	0.31786	0	0	0.53545	0.27519	0	0.07858	0	0	0	0.10299	0	0	0	0	0	0	0	0	0	0	0	0	0	0	0	0	0	0
Anaerotignum_lactatifermentans	0	0.46496	0	0	0	0	0	0	0	0	0.25069	0	0	0	0.51088	0	0	0	0	0.07308	0	0	0	0.14456	0	0.00067	0	0.7727	0	0	0	0	0	0.03518	0	0	0	0	0	0	1.48588	0.38153	0	0	0	0	0.22003	0	0
Streptococcus_vestibularis	0.90174	0	0.98695	0	0	0.04532	0	0.00443	0	0	0	0.08595	5.32762	0	0	0	0.01886	0	1.74161	0.04082	0.0165	0	0	0.00359	0	0.00399	0	0	0	0.00592	0	0.03113	0.08737	0	0	0	0	0	0	0	0.02496	0	0	0	0	0	0.00712	0	0
Anaeromassilibacillus_sp_An250	0.00314	0.11728	0	0	0	0	0	0.03329	0	0.15042	0.00523	0.01367	0	0.03552	0.01649	0.05585	0.16618	0.08196	0	0.96787	0.09178	0.00486	0	0.03202	0.03899	0.06121	0.00121	0	0	0.04465	0.02359	0.0024	0	0.05172	0.02892	0	0.11405	0	0.09915	0	0.07199	0.08451	0	0.27871	0.04761	0.03196	0.01748	0	0.12673
Roseburia_sp_CAG_471	0.01094	0	0	0	1.48157	0	0	0	0	0	0.00054	0	0	0.00152	0	0.01667	0	0.01502	0	0.00862	0.00446	0.05151	0	0.00337	0	0.00138	0	0	0	0.00498	0.00676	0.00307	0	0	0.01173	0.04504	0	0.00968	0.00073	0.00275	0	0.02081	0.04572	0	0.0262	0	0.04	0.00424	0
Lawsonibacter_asaccharolyticus	0.01198	0.2122	0	0	0	0	0.07054	0.12854	0	0.0588	0.01643	0.05094	0	0.05223	0	0.05727	0.11193	0	0	0.27291	0.00568	0.03331	0	0.04646	0.43034	0.00736	0	0	0	0.07643	1.03106	0.04918	0.01653	0.13862	0.0465	0.01118	0.23921	0.00872	0	0	0	0.00559	0.01738	0.18372	0	0.01383	0.02552	0.03131	0.08112
Clostridium_spiroforme	0	0.09961	0	0.13537	0	0	0.0272	0.02916	0.00329	0.14505	0	0	0	0.10195	0	0.00902	0.04252	0.00462	0	0.09805	0	0.32121	0	0.05922	0.02286	0	0.04626	0.12797	0.03881	0.04118	0	0.00622	0.07726	0.01693	0.09615	0.14317	0.0222	0	0	0	0.3757	0	0	0.02259	0	0	0.00542	0	0
Clostridium_scindens	0	0	0	0.46101	0	0	0	0	0.0309	0.00495	0	0	0	0	0.08983	0	0	0	0.00611	0	0	0	0	0.0129	0	0	0.02302	0	1.20962	0	0	0	0	0.00311	0	0.02126	0	0	0	0	0	0.08273	0	0	0	0	0	0	0
Clostridium_saccharolyticum	0	0	0	0	0	0	0	0.02455	0.00622	0.11748	0	0	0	0	0	0	0.23268	0.00097	0	0	0	0	0	0	0	0	0.05666	0	0	0	0	0	0	0.03186	0	0	0	0	0	0	0.29186	0	0	0	0	0	0	0	0
Veillonella_dispar	0.0439	0	2.74709	0.09141	0	2.4738	0	0	0	0	0	0	0.82521	0	0	0	0	0.02424	0	0	0	0	0	0	0	0	0.01434	0	0	0.02536	0	0	0	0	0	0	0	0	0	0	0	0	0	0	0	0	0	0	0
Blautia_coccoides	0	0	0	0.24069	0	0	0.04127	0	0.00292	0	0	0	0	0	0.00584	0	0	0	0	0	0	0	0	0	0.00135	0	0.00534	0.00209	0.24407	0	0	0	0	0.02281	0.06368	0	0	0	0	0	0	0.04955	0	0	0	0	0	0	0
Lactococcus_lactis	0	0	0	0	0	0	0	0	0	0.20308	0	0	0	0	0.14707	0	0.01248	0	0	0	0	0.05918	0.00897	0	0	0.13926	0.01424	0.03599	0	0.0731	0.22719	0	0	0	0	0	0	0	0	0	0	0	0	0	0	0	0	0	0
Eisenbergiella_tayi	0.00241	0.00961	0	1.64165	0	0	0.0031	0	0	0.00508	0	0.18474	0	0	0.21001	0	0	0.00859	0	0	0	0.01343	0	0.00196	0.01846	0	0.014	0.00738	0.01731	0	0.00789	0.02621	0	0	0	0	0.19569	0.13981	0	0	0	0.0339	0	0	0	0	0	0	0
Alistipes_indistinctus	0	0	0	0	0.00125	0	0	0.01716	0	0.2315	0	0.26982	0	0	0	0	0.0767	0	0	0	0	0	0	0	0	0.02071	0	0.01556	1.49084	0.07872	0.00071	0.13413	0.10384	0	0	0	0.01787	0	0	0	0	0	0.05237	0.11723	0	0.04593	0	0.0051	0.01361
Hungatella_hathewayi	0	0	0	1.04889	0	0	0.01512	0	0	0	0	0.01086	0	0	0	0	0	0	0	0	0	0	0	0	0.00097	0	0.01974	0	0.04694	0	0	0	0	0.00755	0	0	0	0	0	0	0	0.03019	0	0	0	0	0	0	0
Firmicutes_bacterium_CAG_145	0	0	0	0	0.01404	0	0	0.04375	0	0	0	0	0	0.00623	0	1.35272	0	0	0	0	0	0	0	0.05975	0.11075	0	0	0.08438	0	0	0.0745	0.00819	0	0	0.11999	0	0	0	0	0	0	0	0	0.0166	0	0	0	0.00388	0
Turicibacter_sanguinis	0	0.0149	0.12297	0	0	0.09167	0	0	0.01131	0.17408	0.00551	0	0	0	0	0	0	0	0	0	0	0	0	0.01712	0.02306	0.2175	0.16266	0.03984	0	0.03117	0.01477	0	0	0	0.11674	0	0	0	0	0	0	0.00597	1.18326	0	0	0	0	0	0
Clostridium_lavalense	0	0	0	0.45892	0	0	0.00979	0	0	0.02887	0	0	0	0	0.03234	0	0	0	0	0	0	0	0	0	0.00263	0	0.00058	0	0.07087	0	0	0	0	0	0	0.00754	0	0	0	0	0	0	0	0	0	0	0	0	0
Streptococcus_gordonii	0.04152	0	3.77405	0	0	0	0	0	0	0	0	0	0	0	0	0	0	0.026	0.20197	0	0.85443	0.00813	0	0.0036	0	0	0	0.01587	0	0	0.00927	0	0	0	0	0	0	0.09688	0	0	0	0	0	0	0	0	0.01054	0	0
Bilophila_wadsworthia	0	0	0	0	0	0	0.09554	0.01984	0	0.15642	0.03816	0	0	0	0.11648	0	0.00428	0.02654	0	0	0.00097	0.0781	0	0.16109	0	0.01084	0.14602	0.00497	0	0.08094	0	0.00137	0	0.04237	0	0	0.07102	0.02428	0	0	0	0.0635	0	0.01964	0	0.0207	0	0.0018	0
Intestinimonas_butyriciproducens	0	0.2705	0	0	0.00782	0	0	0.00513	0	0.473	0	0	0	0.231	0	0	0	0	0	0.02177	0	0	0	0.41953	0.00198	0	0.35637	0.00588	0	0	0.00418	0.08084	0	0	0.16071	0	0	0	0	0.00531	0	0	0	0	0	0	0	0	0
Streptococcus_mutans	0.09672	0	0.66974	0	0	0	0	0	0	0	0	0.02338	0	0	0	0	0	0.05761	0.46765	0.02662	0.07545	0	0	0.00949	0	0	0.00454	0	0	0.031	0	0	0.01148	0	0	0	0	0	0	0	0	0	0	0	0.00854	0	0	0	0
Collinsella_massiliensis	0.07496	0.03398	0	0	0.03876	0	0.00969	0.01188	0	0.01364	0.01105	0.01152	0	0	0	0.01864	0.02287	0	0.10176	0	0.03913	0.00988	0	0.0151	0.0239	0.00555	0.0323	0.00186	0.03739	0.00948	0.15036	0.01658	0.05162	0	0.03018	0	0.45539	0.06401	0.01825	0	0	0.00848	0.06562	0.03409	0.06335	0.40317	0.03762	0.01551	0.13627
Turicimonas_muris	0	0	0	0	0	0	0.19207	0	0	0.00261	0.07168	0	0	0.27145	0	0	0.04261	0	0	0	0	0	0	0.08131	0.03972	0	0.08527	0	0.13558	0.03502	0	0	0	0	0	0	0	0	0	0	0	0.01484	0	0	0	0	0	0	0
Anaerotruncus_colihominis	0	0	0	0	0	0	0	0.01411	0	0.20879	0	0	0	0.1105	0.08431	0.0398	0	0	0	0	0	0	0	0.01446	0.0684	0	0.04864	0.02146	0.57536	0	0	0.01183	0	0.00723	0	0	0	0	0	0	0.00611	0.00233	0	0	0	0	0	0	0
Streptococcus_oralis	0.00122	0	1.30622	0	0	0	0	0.00904	0	0	0	0.03977	0	0	0	0	0	0	0	0	0.16646	0	0.03195	0	0	0	0.002	0.00149	0	0	0	0.0108	0	0	0	0	0	0.03254	0	0	0.00111	0	0	0	0	0	0	0	0
Clostridium_citroniae	0	0	0	0.02835	0	0	0.00963	0	0	0.0085	0	0	0	0	0.04075	0	0	0	0	0	0	0	0	0	0.00073	0.00031	0.05355	0	0.01774	0	0	0	0	0.00074	0	0.00063	0	0	0	0	0.40838	0.00435	0	0	0	0	0	0	0
Rothia_mucilaginosa	0.00076	0.01256	1.52971	0	0	0	0	0	0	0	0	0	0.01132	0	0	0	0	0	0.01937	0.00226	0	0	0.01326	0	0	0.01557	0.00098	0	0	0.00339	0	0	0	0	0	0	0	0.19607	0	0	0	0	0	0	0	0	0	0	0
Actinomyces_oris	0.00155	0.00605	0.71379	0.00979	0.00576	0	0	0.01521	0	0	0	0	0	0	0	0	0.00245	0.02718	0	0.02381	0.02618	0.00967	0.00951	0.00291	0.00223	0	0.00854	0.02119	0	0	0.02716	0	0.00159	0	0	0	0	0.08054	0	0	0	0	0.01681	0	0.00708	0	0	0	0
Holdemania_filiformis	0	0	0	0.09154	0	0	0.06506	0	0	0.03812	0	0.02223	0	0.00484	0	0	0	0	0	0	0	0	0	0.00439	0.01672	0	0	0	0	0	0.0344	0.02808	0	0.03793	0.1033	0	0	0	0	0	0	0	0	0.02132	0	0	0	0.01295	0
Enorma_massiliensis	0.00795	0.01462	0	0	0.00619	0	0	0	0	0.00447	0	0.00695	0	0	0	0.002	0.00442	0	0.02079	0	0.06584	0	0	0.00155	0.00619	0	0.00492	0	0	0.00203	1.13778	0.00527	0.02089	0	0.01004	0	0.06102	0.02036	0	0	0	0.00133	0.0232	0.01196	0.03016	0.0289	0.00476	0.1001	0.03517
Streptococcus_virus_phiAbc2	0.11394	0	0.0998	0	0.04266	0.15161	0	0	0	0	0	0.09425	0	0	0	0	0	0	0	0	0	0.0391	0	0.01308	0	0.02249	0	0.01596	0	0	0	0.01796	0	0	0	0	0	0.03997	0	0	0	0.03073	0	0	0	0	0	0	0.01244
Streptococcus_sanguinis	0	0	1.40797	0	0	0	0	0	0	0	0	0	0	0	0	0	0	0.01663	0.27356	0	0	0	0	0	0	0	0	0.00726	0	0.01226	0.00776	0	0	0	0	0	0	0.08932	0	0	0	0	0	0	0	0	0	0	0
Enterorhabdus_caecimuris	0.00931	0.04645	0	0.00233	0	0	0.00816	0.00211	0	0.01659	0	0	0	0.02286	0	0.00751	0.0098	0.0161	0	0.02752	0	0.01185	0	0.01253	0.02314	0.02427	0.00158	0.03118	0	0.02487	0.02895	0.00626	0.00061	0.00648	0.02436	0.00227	0	0	0	0	0	0	0.05273	0.00328	0.01043	0.00895	0.01564	0.01129	0.00903
Streptococcus_mitis	0	0	0.88663	0	0.00178	0	0	0	0.00464	0	0	0.04215	0	0	0	0	0	0	0.03429	0	0.00714	0	0	0	0.00192	0	0.00024	0	0	0	0	0	0	0	0	0.01701	0	0.01101	0	0	0.01603	0	0.00896	0	0.0064	0	0	0	0
Actinomyces_odontolyticus	0	0.00349	0.05702	0	0.00525	0	0	0.03641	0.0036	0	0	0	0	0	0	0	0	0.03	0	0	0.05368	0.01907	0.00509	0.00033	0.00365	0.00945	0.01057	0.00212	0	0.00297	0.0144	0.00124	0.00532	0	0	0.00118	0	0.07139	0	0	0	0.02259	0.03139	0	0.0148	0.00791	0	0	0
Gemella_sanguinis	0	0	0.96109	0	0	0	0	0	0	0	0	0	0	0	0	0	0	0.01187	0.03558	0	0	0	0	0	0	0	0	0	0	0	0	0.01235	0	0	0	0	0	0	0	0	0.0031	0.01085	0.02715	0	0.00253	0	0	0	0
Romboutsia_ilealis	0	0	1.08928	0	0	0	0	0	0	0	0	0	0	0	0.01354	0	0	0.01	0	0	0.00849	0	0	0.01067	0.00619	0	0.00471	0	0	0	0.00542	0	0.00143	0.00648	0	0	0	0	0	0.00909	0	0	0	0	0	0.00745	0.0424	0	0
Dielma_fastidiosa	0	0	0	0	0	0	0.01609	0	0	0	0.00176	0.05523	0	0.00334	0	0	0	0	0.014	0	0	0.00836	0	0.00025	0	0	0	0	0	0	0	0	0	0	0.01534	0	0	0	0	0	0	0.01203	0	0	0	0	0	0	0
Actinomyces_sp_ICM47	0	0	0.02788	0	0.01187	0	0	0.0009	0.0034	0	0.00109	0	0	0.00251	0	0	0	0.02509	0	0	0	0	0	0	0.00567	0.01487	0.0011	0.02889	0	0	0	0	0	0	0.00813	0.00892	0	0	0	0	0	0.00117	0.00635	0	0.0086	0.02502	0	0	0.00579
Actinomyces_sp_HMSC035G02	0	0	0.07296	0.00497	0	0	0	0.00643	0	0	0	0	0	0	0	0	0	0.00888	0	0	0.02043	0.00887	0.01467	0	0.00406	0	0.00193	0	0	0	0	0	0	0	0	0	0	0.05292	0	0	0	0.01148	0.01569	0.00047	0.00684	0	0	0	0
[truncated: 171 more columns]

## Sheet: Table_S5
Functional profiles of obtained metagenomes.
KO/Sample_ID	CD16_T1_B3	CD16_T2_B3	CD16_T3_B3	CD17_T1_B7	CD17_T3_B7	CD17_T4_B7	CD1_T1_B1	CD1_T2_B1	CD27_T1_B7	CD27_T2_B7	CD27_T3_B7	CD28_T1_B7	CD28_T2_B7	CD28_T4_B7	CD35_T1_B7	CD35_T2_B7	CD35_T4_B7	CD38_T1_B7	CD38_T2_B7	CD38_T4_B7	CD38_T5_B7	CD5_T1_B2	CD5_T2_B6	CD5_T3_B6	DONOR2_T1_B4	DONOR3_T2_B2	DONOR3_T3_B6	DONOR7_T1_B8	DONOR7_T2_B8	SFM028_T1_B1	SPORT17_T1_B3	SPORT4_T1_B8	UC15_T1_B3	UC15_T2_B3	UC15_T3_B3	UC15_T4_B3	UC15_T5_B5	UC22_T1_B6	UC22_T2_B6	UC22_T3_B6	UC22_T4_B6	UC22_T5_B6	UC33_T1_B7	UC33_T2_B7	UC33_T3_B7	UC33_T4_B7	UC36_T1_B7	UC36_T2_B7	UC36_T3_B7
K03088	44121.9	27791	22549.7	5836.47	2689.22	7895.15	15744.2	2517.14	7182.33	9608.8	6563.3	9519.8	6215.64	3189.26	20436.6	10917.8	8374.95	5032.85	3387.99	5793.02	2175.05	1841.69	17256.2	24389.7	25122.8	19650.6	30013.3	10960.6	23739	13517.1	64343.1	27668.3	433.765	960.67	19508.4	41045.5	13791.8	2674.15	3401.8	10428.4	25854.8	27754	293.773	2191.2	1141.28	4887.08	17862.8	17163.6	8396.8
K02003	29051.8	25387.4	26047.1	5560.34	4548.12	8526.88	13252.7	2481.21	14137.1	14110.6	10469.2	3714.19	5348.23	6388.25	15916	7858.25	9281.37	3841.41	3348.41	4395.51	1547.9	9353.43	10711.5	26078.8	30141	18676.7	18030.3	14449.5	23583.2	5818.37	36171.5	13412	350.306	1317.13	11640.9	24969.2	14117.3	1065.59	1656.21	7043.02	14887.6	23587.3	377.003	3053.01	1683.12	6242.56	9940.89	12100.5	6199.85
K21572	43067	27193.9	15461.2	74.8812	264.336	556.194	13941.2	1332.39	1943.13	1495.87	4048.19	14057.1	4743.8	142.749	8549.34	5260.01	1718.34	2956.08	698.65	3479.53	768.336	0	21489.3	1379.39	2916.7	25084.7	31418.6	6758.24	2889.65	16352.6	39296.2	27835	8.81735	71.1183	16247.7	31493.7	12932.8	3066.62	4753.25	10472.6	31586.2	16037	125.633	615.511	284.386	457.412	12523.7	7447.98	2098.42
K06147	20884.3	15596.1	20132.7	5452.21	5408.68	9177.17	9643.83	2133.54	13313.4	14445.3	7895.36	2409.85	3476.16	5279.68	11874.8	5750.36	8546.66	4669.31	1370.4	3425.97	1812.73	5814.93	9235.24	35373.4	30792.7	10325.3	12156.8	12998.6	22257.6	2471.62	37814	8493.92	457.139	1469.32	12065.4	22678.1	12503	703.635	1081.6	5062.55	10529.3	24940.4	400.058	2922.07	2105.03	7814.45	7931.91	11169.9	6701.01
K02004	20263	15423.5	15344	2596.75	3220.11	3037.74	10004	1997.54	10464.6	9689.34	7144.42	2341.29	2032.46	3031.58	9242.22	4451.04	4022.26	1485.32	1023.14	2768.78	430.231	8564.51	8276.91	10192.2	19640.1	12131.9	11587.2	9585.96	17120.1	4059.58	24935.5	9273.2	209.831	663.811	8691.42	17370.1	8727.08	987.081	1454.68	5719.55	12520.8	18078.8	214.75	1194.95	591.621	2913.98	6963.3	7631.38	3507.21
K03169	21778.9	11198.9	14807.3	2721.84	3196.59	5884.67	9389.6	1381.91	6700.48	7432.94	5687	6929.72	4989.62	1648.55	8293.86	5058.85	5909.52	7215.55	2044.72	3345.1	1074.61	5031.46	7608.55	16404.5	16569.2	9240.57	9365.95	7182.87	14447.1	4079.04	24753.7	7665.47	357.261	1223.64	9698.53	19214.4	9793.75	1137.97	1598.75	7142.5	9041.04	17402.5	301.116	1655.63	904.644	2556.03	6057.18	6497.51	4147.32
K03205	21534.9	12573.3	15948.9	6174.09	3843.38	7241.94	9049	2010.64	6213	7142.43	5345.36	1246.26	2970.29	3308.5	16445.4	7775.93	7869.72	1949.9	569.358	1988.21	1374.42	2713.32	6062.43	15402.8	18017.2	5610.44	8024.9	5112.86	13473.3	1627.97	26232.4	5692.97	330.495	1145.73	8291.2	16186.2	8624.57	712.111	1255.33	5105.81	7509.25	16958.5	188.817	1979.75	1008.28	2281.57	7169.99	9575.16	6411.29
K01990	12371.5	10941.8	13622.3	2187.29	2262.16	3382.98	10127.6	2499.33	16028.7	12675.9	5452.44	3111.3	2701.67	2694.52	6884.49	3655.29	4181.19	2121.02	2770.37	2756.03	717.38	13171.9	6779.96	12058.7	16618.8	8278.78	10081.8	7446.34	20157.6	3190.52	23706.8	8491.63	243.629	691.916	7431.31	14655.2	8897.92	712.725	752.823	4714.31	7993.81	12401	155.103	1208.03	744.426	3956.48	5043.36	7125.3	2762.66
K03496	18300.2	15787.5	16107.5	2604.46	2745.17	3495.2	7650.4	1462.88	3925.02	4723.47	5142.05	3098.35	2770.06	2530.51	9940.83	4978.52	3994.41	1581.39	1112.1	1916.52	761.744	5950.84	8465.18	12249.4	15325.8	14423.1	10359	7597.53	12454.3	3167.97	23480.9	6856.72	418.739	1775.42	10436.6	19831.5	9955.21	844.012	1300.93	4245.89	9842.31	15254.5	198.761	1805.62	855.679	2318.86	4474.55	5296.57	2888.17
K03497	13830.5	9287.42	9745.27	1868.03	3140.27	4044.62	6974.57	1297.22	5575.67	5902.13	4535.49	2630.27	3205.94	2313.47	9934.48	4636.6	3140.13	1916.61	1245.24	2086.11	650.82	6714.17	5494.41	16561.4	16680.3	6521.37	7007.67	6516.86	14380.9	2952.59	16990.4	6942.43	357.99	1123.51	7119.06	13654.6	6448.66	656.314	989.58	4252.24	6865.04	14486.1	184.749	1618.3	744.589	2352.18	3958.64	5141.14	2964.65
K01190	14021.6	9994.38	8767.7	690.64	880.017	2639.46	6846.31	1070.96	4099.32	3884.3	3134.49	4369	2992.31	876.46	5511.62	3374.34	2406.39	1517.47	3314.7	2238.18	334.86	2201.95	7458.59	15801.2	11575.6	10933.2	9443.97	5220.21	9174.08	4446.55	16684.1	8534.74	163.345	675.529	6929.44	15511.2	8106.88	955.194	1306.08	4531.89	9914.29	12170.1	151.264	514.906	326.672	1759.65	5264.97	4803.27	2165.78
K01992	9864.16	7237.52	6912.07	1483.94	3190.63	2013.68	5815.64	975.882	9890.28	7547.02	3795.37	3051.24	2694	2512.29	4912.96	2846.59	2418.18	1205.61	2354.96	2030.07	389.574	11764.2	5773.25	7885.45	10466.8	7390.47	6844.99	4558.53	10376.8	2842.55	16745.2	7127.91	201.345	448.269	5583.95	12188.4	5531.58	630.18	764.71	3247.66	6528.16	9236.69	121.412	631.831	301.894	1830.54	4169.3	4396.59	1798.61
K02355	10574.4	11842.6	12753.2	1694.88	1649.68	3052.3	5275.74	903.338	4068.32	4225.04	2662.71	2112.17	2708.01	2204.23	5897.19	2837.42	2968.93	1371.39	1308.21	1628.75	832.689	5782.13	6459.89	7710.38	11158.9	10827.8	7978.45	7640.45	8153.7	3424.86	13949.8	5811.28	220.148	831.311	5166.6	12911.3	6268.71	408.995	874.694	2510.62	6156.68	7828.02	238.04	2514.75	953.187	2286.34	2764.55	3158.18	2207.84
K01915	9080.18	9314.78	9796.01	1154.18	1495.44	2569.11	4752.52	760.819	3775.16	3892	2920.52	2066.7	2493.03	1587.5	4739.61	2568.18	3135.18	2567.9	2105.39	1602.35	515.581	3906.72	4966.29	8032.03	9530.82	10227.4	6974.04	6166.56	7179.93	3101.17	11231.7	5524.72	157.723	578.688	4161.51	11268.3	5089.12	392.789	655.353	2130.38	5996.75	8137.09	156.994	1161.04	612.499	2313.34	2923.4	3161.82	1842.14
K02529	6356.86	5162.39	6104.25	900.782	2499.92	1801.52	5590.85	1250.33	5854.86	5045.67	3862.2	1086	993.244	1631.7	3119.17	1676.66	2048.3	524.249	139.174	1296.15	205.455	7667.34	4861.2	10678.3	12067.6	6876.54	4447.48	6402.52	12029	2241.65	9625.89	4950.49	187.821	647.768	4519.9	8596.15	4896.08	486.584	578.623	2774.85	6173.06	12538.2	131.601	376.341	330.7	2067.67	2302.2	2672.23	1670.58
K01740	8540.07	7487.62	8732.32	1624.77	973.437	3146.29	4206.44	740.363	3925.21	4185.48	2901.11	1779.37	1884.98	2112.62	5115.79	2598.98	3393.09	1604.98	1832.22	1335.87	320.657	2326.8	4254.8	10233.2	10252.2	7736.81	5409.97	5764.03	8865.03	1951.46	11576.1	4594.28	135.277	655.254	3967.82	9655.85	4225.87	332.467	603.052	2017.71	5087.61	8369.61	164.261	1220.26	548.17	2629.31	3055.3	3915.76	2107.89
K02315	10988.6	6060.25	8122.66	4502.03	2637.23	5315.77	4373.78	898.284	3840.98	4125.68	3176.33	1054.92	1700.6	2247.95	5184.48	2866.94	4398.05	1508.7	369.264	1270.77	851.157	1062.93	2721.57	10540.6	9686.09	2660.85	5593.92	2841.92	6282.39	942.388	16008.6	2703.28	162.869	494.857	4660.09	10415.8	4997.97	511.112	890.534	4171.27	6845.73	11044.3	156.124	2470.63	688.752	1262.5	3677.18	4309.02	3840.7
K07133	11555.6	10033.5	9417.73	1162.69	407.507	951.525	7105.61	1208.44	2227.69	2217.52	2974.3	1957.37	1033.79	2502.43	4167.95	2125.04	1668.46	250.249	143.214	1379.23	367.112	413.562	4384.47	2183.55	10713.3	7107.53	8256.39	5020.5	9173.31	3683.57	18437.8	4743.9	66.0818	435.373	5320.12	12004.9	7041.77	639.21	754.577	2447.38	6432.16	4949.85	74.7666	616.103	159.354	637.611	2593.98	2556.24	905.342
K02470	7920.19	7655.24	8523.97	1353.84	1669.97	2729.91	4045.23	729.004	3736.42	3869.77	2703.33	1544.07	1991.15	1941.98	4168.61	2159.55	2501.72	1511.98	1200.5	1211.1	566.691	3899.76	4459.15	11034.7	11317.9	6990.72	5352.11	5829.74	9222.26	1622.49	10419.4	3862.43	175.321	757.306	4203.35	9220.32	5421.77	293.054	563.939	1978.87	4472.98	8577.54	168.407	1295.01	669.147	1865.39	2479.58	2830.18	1854.54
K05349	7395.56	7566.71	7354.03	668.342	827.608	1403.73	3779.52	759.762	2135.31	2812.24	3115.62	3059.62	1697.61	936.286	3234.5	2135.43	2362.16	1243.51	122.032	1831.44	202.122	936.214	3419.87	5340.08	10302.2	7028.39	6151.53	7168.2	7889.47	3093.79	10555.9	7459.58	118.674	501.505	3499.13	9611.97	4144.02	528.753	565.35	2258.13	4800.68	6156.96	91.5148	516.047	251.29	1916.56	3554.07	3351.21	1454.35
K00266	7497.48	6811.32	8919.88	957.171	1427.55	2881.97	3940.48	596.429	3450.26	3846.33	3142.21	1547.46	1280.49	1065.77	5103.63	2666.02	3046.54	2535.86	307.327	1252.97	443.843	2628.31	4722.05	15732.5	9407.66	6258.26	5066.88	5258.5	7433.05	1740.09	10170.6	3934.69	184.761	750.051	3965.27	9223.02	4637	373.66	619.845	2201.11	4845.57	7766.43	133.646	800.837	589.072	2518.57	2435.4	2935.85	1751.53
K02112	7632.32	7052.58	7863.36	1734.57	1929.35	3560.82	3916.35	585.94	4264.42	4399.17	2587.27	1311.63	1364.42	2637.47	3932.81	2281.48	2439.43	1506.36	1169.64	1217.95	358.109	3365.78	4031.1	11105.8	10528	6168.8	5022.99	5324.26	8820.24	1309.25	10688.5	3185.01	196.254	698.427	3881.03	8441.07	5345.34	289.135	464.322	1719.52	3808.68	7040.73	172.359	872.602	578.838	2386.89	2551.52	3279.13	2019.83
K06180	6641.01	6302.08	6573.45	583.156	755.422	1946.38	3943.43	502.878	4945.2	4068.83	2143.79	2644.51	2275.72	972.503	3178.34	1905.53	1909.06	1576.28	1884.59	1618.94	478.135	6946.01	5255.5	9379.22	6510.53	6816.6	5565.92	5690.24	6975.05	3139.9	10367.4	5557.35	107.243	376.25	3959.43	8816.62	3121.06	372.918	599.522	2088.4	5544.4	6646.37	167.023	1308.86	552.838	2075	2641.5	2900.65	1494.86
K04043	7309.2	6636.61	8267.6	1964.4	1565.98	3269.08	3984.33	658.781	4213.8	3839.73	2246.61	1290.88	2016.96	2593.43	4558.22	2268.66	2770.04	1472.39	1148.27	1291.52	697.938	3657.13	3775.43	9735.62	9617.93	6665.46	4757.66	5424.56	8626.53	1569.48	9182.93	3355.12	163.861	650.834	3885.48	8192.5	4426.91	258.501	589.795	1924.56	4081.04	6947.66	169.109	2255.97	981.048	2114.03	2110.48	2651.99	2389.58
K03499	6922.64	4469.88	5819.92	1084.19	849.643	2520.22	4589.72	841.545	4522.55	4492.38	2253.31	1293.47	1529.73	977.461	3122.34	1614.04	2536.91	1581.8	1028.56	1273.54	389.715	5318.41	4763	13754.8	9796.8	4570.39	3913.79	4086.94	9395.98	1999.41	10080.1	4032.93	163.658	617.253	3939.82	7932.58	3997.19	444.143	611.031	2824.2	4731.87	8439.18	119.622	832.55	566.099	1729.44	2406.15	2746.67	1981.36
K00615	7263.19	6878.26	7826.79	1198.69	2088.23	2626.69	4763.75	775.625	3752.33	3842.13	2274.27	1497.75	1646.79	1670.08	5000	2722.32	2196.15	1306.44	1090.39	1204.61	496.717	4939.52	3931.11	9201.98	9947.98	5346.95	4565.64	4635.97	9738.63	1889.54	9620.25	4539.82	199.383	521.151	3197.31	7690.22	4212.27	327.822	528.047	2288.79	4692.31	6940.57	108.356	644.621	402.027	1748.12	2618.95	3176.95	1630.92
K03086	7456.28	7326.13	8812.51	1307.85	1402.23	2905.03	3573.25	547.105	3460.73	3492.9	2016.77	1060.2	1805.04	1575.49	3888.24	1984.73	2435.48	1273.99	875.467	1096.49	537.688	3263.6	3884.14	10961.2	9564.97	6353.22	4687.49	5351.8	7779.36	1317.82	9404.6	3530.27	155.767	608.22	3620.78	7949.85	3837.89	430.855	814.721	2905.78	4262.94	6696.2	158.222	1599.13	807.337	2008.65	1966.03	2324.34	2110.68
K06941	13389.8	11017	9949.05	2203.76	1118.22	2691.72	4699.76	1046.16	3342.36	3939.84	4269.59	986.844	1288.13	1611.27	3097.6	1550.33	3195.4	646.599	936.868	903.086	508.715	3216.48	2742.07	4579.42	4544.04	3958.43	3670.67	3192.08	4869.26	1649.19	14888.7	2970.44	183.001	525.957	4689.75	13144.9	9822.38	204.469	315.944	1353.56	2995.04	6000.4	87.7368	707.472	288.897	1125.51	2311.7	2440.23	1463.14
K01955	7822.72	8138.57	8502.11	3343.41	1515.28	2472.5	3738.27	585.675	2895.2	2670.09	2129.87	1647.75	2126.63	1787.41	3984.04	2202.84	2315.2	1071.98	2084.56	1260.59	448.445	3779.21	4263.89	5596.27	7230.74	9004.83	5863.86	5303.2	4984.2	2738.45	9789.65	4409.95	148.092	537.668	3698.69	9100.48	4504.67	282.547	650.585	1579.75	4814.01	5831.2	143.778	1056.61	497.021	1562.08	2405.94	2385.2	1131.16
K02111	6676.74	6215.78	7615.01	1293.46	1588.24	3148.84	3949.11	625.807	4194.06	4097.89	2179.83	1294.6	1200.47	1969.89	3681.46	2103.62	2648.98	1342.58	1175.5	1089.49	304.569	3781.99	3829.5	10473.5	9597.24	6853.17	4548.47	4585.44	8017.5	1263	9682.61	2969.52	165.8	620.601	3498.28	8146.15	4931.38	264.463	474.246	1685.75	3485.68	6271.62	160.801	810.197	522.985	2245.03	2283.86	3198.11	1800.33
K03798	7488.72	6465.03	7143.06	1945.35	1883.35	3380.95	4334.49	809.408	4260.29	4020.13	2609.38	1563.11	2282.34	2592.5	3962.8	2202.64	2684.06	1686.87	1206.82	1259.43	967.389	2975.05	3090.02	8086.3	9938.21	4780.51	4873.86	4713.37	8877.1	1554.75	9459.59	3474.62	154.258	489.439	3344.32	7037.34	3713.66	220.267	420.135	1497.62	3597.05	5837.78	173.128	2692	1141.12	2308.97	2471.95	3046.49	2593.14
K02469	5942.45	5241.36	6715.35	1259.36	1272.22	2533.33	3916.04	727.415	3544.23	3563.69	2301.08	1043.83	1634.21	1106.69	4082.55	1891.67	2229.2	1275.76	1138.15	1025.41	472.194	3672.09	3906.97	11232.9	9299.78	5461.51	4219.66	4510.67	8357.7	1765.47	9101.96	3451.51	165.489	617.239	3469.77	7135.65	4299.98	283.901	457.828	1837.83	3869.25	7566.28	159.204	1354.28	610.535	1904.4	2011.76	2549	1779.99
K03655	8066.07	5903.01	6606.8	640.067	1366.8	1391.33	4415.82	825.848	2764.15	2519.42	2196.49	1510.07	1585.07	1373.61	3290.43	1775.46	1748.34	854.308	882.684	1163.14	344.827	3157.75	3574.18	8046.06	5381.01	5916.53	4422.17	4762.03	4987.13	2466.01	14393.1	5777.48	111.275	369.945	4718.11	9039.87	3442.31	349.48	447.471	1778.55	4850.83	7272.68	105.156	865.515	490.164	1583.8	2498.62	2348.51	1119.36
K02886	6496.22	7883.45	7751.16	1356.71	1780.32	2144.88	3346.41	550.21	3163.34	2975.84	1832.9	1452.3	1773.81	1981.33	4494.38	2060	2165.61	1016.48	1037.44	1021.33	577.521	3736.56	3926.38	6747.09	8216.21	7598.61	5032.38	5296.66	5623.93	1742.61	8050.46	3145.35	161.832	589.844	3202.37	8066.94	4463.39	242.85	535.928	1462.21	3973.89	5351.25	122.67	1387.53	621.152	1821.44	1758.31	2027.08	1403.77
K03701	6799.38	6618.13	6310.91	1461.35	1364.26	2654.02	3155.72	483.905	2942.66	2638.48	2782.13	2071.6	2316.54	1296.81	3887.77	2428.72	2480.69	1702.56	2111.42	1336.19	654.839	3675.18	3240.37	5822.24	6401.83	6501.69	5314.51	4721.53	4780.76	2767.08	9370.54	4527.12	115.38	370.115	3155.38	7043.75	3230.06	227.715	385.91	1253.89	4188.47	5156.88	188.41	1844.71	930.13	2131.49	2843.15	3018.36	1656.63
K01874	7115.9	6680.13	6972.8	1504.67	1261.13	2028.5	3826.3	653.131	2976.2	3043.2	2613.75	1848.08	1645.04	1499.35	5090.69	2454	1913.79	924.206	1024.99	1118.14	461.633	3327.46	3393.74	4628.42	8885.57	5412.33	4826.21	4633.67	6702.95	1776.51	9335.93	3762.08	138.66	433.507	3045.31	7145.02	3972.48	212.689	440.997	1658.7	4084.68	6219.12	112.651	1712.89	552.138	1342.63	2409.29	2623.64	1360.3
K00602	7343.61	8703.52	8728.25	766.917	1589.96	1844.51	3122.4	416.279	3233.48	2729.08	2010.79	1469.62	1648.95	1750.4	3265.93	1755.14	2127.26	1007.86	1127.7	1142.73	443.064	3260.01	4054.27	5766.79	6374.3	7470.71	5528	5016.48	4349.68	1984.03	7713.32	3699.02	134.397	485.643	3180.63	9097.93	3718.01	282.693	554.42	1475.53	4561.17	5017.35	109.967	1156.08	558.438	1632.34	1996.87	2031.28	1079.51
K02358	6842.35	6775.23	7145.74	1643.36	1875.63	2201.05	3209.37	545.942	2209.64	2341.18	1877.1	1306.35	1803.78	1704.15	5401.25	2580.54	1874.35	819.644	1163.31	974.067	552.823	6719.12	4576.47	4547.65	8231.93	6860.18	5033.2	4973.37	6150.42	1828.07	9213.54	3741.09	177.155	539.695	3212.8	7241.88	3924.13	258.455	571.184	1511.56	3771.15	4698.43	137.422	1897.61	538.751	1233.88	1807.02	2264.85	1498.66
K00656	6548.12	6122.67	6493.91	1329.46	4055.14	1907.61	4435.12	661.317	3139.27	2875.52	2022.31	1153.64	1331.96	3078.46	4080.04	2128.56	1506.18	958.685	1234.72	1179	428.849	6399.51	3828.95	4894.89	7400.8	5660.96	4225.85	4006.7	5678.31	2070.95	8269.05	3346.95	229.042	521.584	3519.18	7514.2	4426.58	219.935	407.027	1346.1	3895.06	5917.28	125.156	921.274	431.869	1260.37	2169.34	2283.46	1293.17
K18220	9690.66	22134.8	11842.1	1828.79	625.436	1804.07	4253	763.392	2512.48	2282.96	2037.33	717.731	794.876	2089.19	3901.12	1859.25	1225.4	446.831	178.784	812.782	339.935	2198.02	1943.8	2050.94	4090.12	2666.55	3960.99	3895.97	3436.2	2109.72	8227.74	4174.99	207.593	981.847	4574.81	14407.4	7031.28	253.523	416.118	1338.16	4245.7	5317.57	55.827	370.611	165.989	407.252	1820.96	1756.33	1528.52
K02878	6700.91	8017.24	7693.35	1534.26	1485.05	2307.45	2891.45	528.397	3085.91	2847.26	1803.36	1255.53	1560.06	1702.31	3646.95	1852.25	1702.21	877.743	1068.95	997.656	485.01	3376.13	3473.09	4823.7	7661.83	6370.62	5229	4875.85	5533.55	1530.92	8258.19	3380.14	155.761	586.672	3145.03	7868.62	3960.93	165.108	607.716	1459.31	3866.24	5335.56	121.218	2236.71	644.352	1538.41	1602.79	2085.2	1505.17
K01687	6507.79	5781.24	6566.77	1137.42	1946.34	2093.83	3169.81	542.945	4143.28	3721.42	4167.37	1426.07	1503.19	985.24	3704.94	1803.66	2301.47	1194.91	1227.6	1099.1	425.999	3533.1	3402.53	10214.2	8255.85	6111.77	4190.29	3835.02	5629.12	1498.93	7470.17	2967.04	154.051	554.099	3056.04	6619.67	3649.71	252.77	442.436	1591.84	3478.18	6312.88	118.25	611.065	385.546	1608.34	2119.7	2461.11	1517.46
K02950	7223.14	8035.65	8012.93	2017.46	1530.98	2106.95	2619.63	530.044	2394.86	2440.79	1846.05	1383.44	2040.96	2290.11	4730.32	2216.08	1685.21	802.06	1112.97	892.661	743.039	3758.45	2904.34	3550.21	8189.16	5483.21	5172.26	5013.61	5794.19	1600.19	9032.13	3610.85	127.477	470.114	3193.4	7571.8	3677.39	212.953	561.495	1458.3	3938.13	4855.18	156.118	2167.73	586.544	1240.25	1613.68	2140.16	1615.41
K08303	5501.72	4333.76	5406.07	857.703	2014.23	2210.46	3939.7	587.876	3211.01	3270.96	1827.62	2002.44	1854.11	987.141	3389.77	1842.7	2107.19	1348.76	1905.09	1262.01	436.635	5394.33	3980.4	10744.9	6172.78	5479.12	3867.89	3774.88	5560.07	2215.62	8550.65	3972.66	178.381	459.721	3396.41	6712.05	3545.08	299.188	496.455	1814.67	3941.99	5513.66	125.723	654.571	401.881	1889.01	2349.35	2648.88	1245.22
K21636	6997.25	5542.2	5498.58	1710.31	1291.93	2485.72	3170.63	558.998	3268.01	3222.26	2507.1	1811.43	1729.54	2298.27	4119.38	2262.21	2293.2	1033.1	1171.53	1118.96	491.591	3852.59	3161.95	4594.45	7330.24	4964.73	4474.67	3897.5	5429.49	1911.37	8726.75	4032.52	150.239	475.604	2896.72	6815.8	3700.53	232.826	513.311	1495.93	3736.14	6042.59	129.758	1918.04	641.502	1738.99	2078.39	2446.94	1899.96
K03043	6072.54	6904.64	6988.98	1438.2	1600.44	2196.1	3382.24	554.59	2795.04	2706.55	1883.28	1415.56	1858.11	1721.32	4048.7	2175.23	1695.24	924.035	1192.53	1000.93	591.593	3911.93	3492.17	4693.6	7019.45	6530.67	4800.8	4209.01	5071.17	1863.68	8396.42	3382.36	146.282	440.353	3103.98	7277.33	4068.53	218.277	482.961	1376.76	3648.86	4797.19	138.94	1894.04	779.635	1607.47	1758.06	2137.08	1620.14
K01951	6653.99	5910.3	6682.48	1130.33	1486.46	2190.85	3181.08	465.815	3393.12	3018.99	2009.08	1796.04	2204.14	2146.27	3391.91	1861.82	1820.96	1324.05	1965.6	1405.13	592.608	4156.13	3553.44	4787.15	6157.95	6481.63	4613.43	3781.81	4878.18	1936.78	7924.95	3664.9	146.027	392.683	2973.69	7608.15	3464.41	247.816	430.459	1359.01	3749.62	5079.42	143.646	1176.16	622.266	1835.91	1897.77	2313.09	1241.52
K00688	5886.07	5366.88	6404.04	868.819	1726.8	2076.54	4474.91	747.187	3312.29	3283.56	2134.58	778.742	990.657	915.646	3598.54	1874.07	1706.73	459.817	852.805	1000.67	262.435	2793.93	3015.56	6718.19	8503.08	5212.05	4045.01	3614.2	6612.32	1776.39	8915.66	3604.51	163.374	543.988	3638.91	7837.06	4334.96	316.095	507.841	1726.56	4279.01	7047.62	75.8051	350.214	309.691	1529.9	1914.06	2474.78	1355.68
K01940	6437.59	6245.46	7475.14	1124.46	1574	2204.69	3288.56	561.29	1989.37	2319.31	1740.82	1426.77	1548.12	922.515	4418.63	2194.71	2008.45	734.98	1141.18	869.608	375.261	3251.87	3816.08	5607.82	7699.84	6405.08	4484.99	4410.15	5259.79	1746.65	7882.44	3118.18	170.49	652.727	3531.23	7743.23	4202.77	261.61	496.163	1650.2	3662.68	5556.85	123.096	1082.38	387.827	1389.12	1856.7	2158.79	1263.24
K01875	6963.69	6171.77	6995.39	1978.32	1178.31	2473.03	3172.27	572.435	2698.74	2680.72	2014.41	2072.74	1831.29	1905.18	4346.88	2012.68	2005.38	1016.39	1185.97	1034.53	571.577	3723.47	3120.92	4833.81	7695.85	5160.62	4266.03	3891.18	5050.38	1762.2	8230.68	3374.16	140.866	469.216	3043.23	6772.65	3687.17	180.491	401.536	1263.68	3242.86	5497.11	131.867	2439.83	760.085	1659.12	1973.78	2051.7	1674.64
K00262	6812.11	6044.17	6591.82	1016.37	1194.08	1603.07	3598.71	528.851	2773.64	2526.63	1911.67	2400.34	1664.93	1567.73	3689.71	1958.29	1731.07	1012.57	1207.14	1169.23	542.889	1909.84	2672.96	4734.8	6288.19	6282.84	4909.42	3967.67	4440.5	3100.56	9429.36	4690.84	83.0477	434.955	3314.34	7790.53	3132.66	276.517	498.169	1536.98	4119.1	5316.44	167.373	1358.39	581.979	1741.51	1972.36	2240.7	1260.73
K02946	6570.81	7609.93	7401.12	1645.96	1603.64	2071.71	2255.94	481.768	2519.41	2796.64	1933.83	1265.84	1817	2069.53	4341.5	2039.34	1763	917.122	948.074	939.659	704.636	3706.77	3386.92	3869.7	7370.63	5741.63	4861.33	4783.22	5371.38	1279.2	8260.5	3644.05	145.658	513.277	3333.35	7335.92	2832.66	174.769	532.844	1402.53	3688.72	4846.45	160.652	2146.84	750.635	1344.18	1729.43	2170.63	1565.9
K04759	6879.08	5132.37	6137.08	1885.28	1642.13	3263.26	3272.98	564.858	2982.33	3395	2025.57	1044.59	1491.37	1788.93	4519.37	2280.84	2290.19	1294.26	1047.7	1079.4	523.807	2039.4	2559.03	8156.83	8474.5	3867.12	3452.24	3476.19	6779.3	1028.3	8262.13	3130.23	129.277	495.699	2827.16	6290.55	3047.26	242.533	428.822	1604.92	3017.06	5882.54	119.146	1946.21	583.006	1817.69	2067.28	2668.76	2168.5
K00973	5656.73	7781.4	8601.29	669.205	1657.72	1307.48	2813.18	457.3	2485.55	2306.49	2073.28	1578.15	1571.43	1337.76	1901.56	1300.84	1301.94	1076.58	1232.65	1083.84	575.969	1958.39	3065.02	4382.83	6637.15	7601.99	5552.24	5284.79	4673.94	2419.89	7022.69	2977.87	153.268	693.443	3731.87	10913.6	5073.42	204.956	547.928	1335.53	3636.97	4396.31	92.4174	654.238	422.905	929.765	2170.04	1946.37	1006.15
K03046	5840.62	5999.4	6092.58	1314.08	1396.93	2235.74	3252.53	509.961	2841.62	2727.36	1875.37	1481.25	1976.52	1739.53	4114.07	2056.75	1733.53	907.932	1272.86	1001.59	613.682	3846.42	3426.07	4946.78	6499	5954.81	4420.97	4180.3	5076.34	1950.82	8150.35	3302.47	123.024	421.458	3014.18	6761.35	3392.75	211.343	481.195	1392.9	3626.74	4831.69	143.508	1773.21	707.813	1598.97	1834.65	2079.94	1496.16
K00134	6894.88	5437.32	6546.54	1972.04	2054.25	2126.93	3649.08	674.965	2710.03	2727.16	1817.51	987.082	1695.98	2105.31	4523.21	2169.22	1790.92	945.835	1060.63	1109.02	556.809	4384.7	3073.44	3187.06	6960.75	5241.58	4331.23	3631.11	4407.73	1784.84	8565.35	3424.96	146.368	435.363	3030.28	6751.96	3535.36	222.422	390.371	1409.32	3172.59	4550.5	118.304	2736.59	667.495	1447.63	1807.16	2187.57	1792.61
K01710	6104.2	6145.39	6099.21	1030.72	1396.87	1446.84	2855.07	502.053	2172.93	2006.92	1958.34	1213.12	1512.39	1110.87	2045.09	1365.85	1491.28	949.158	1120.06	988.307	461.147	2082.32	3299	4242.2	6700.13	8626.63	5810.03	5575.88	4719.42	1764.02	7699.68	2964.35	150.224	648.217	3302.07	9178.46	3988.08	215.771	567.907	1492.98	4359.61	4836.08	106.023	784.694	440.64	1024.89	2063.46	2008.85	985.749
K01897	5742.22	3954.49	3540.96	375.205	1037.87	611.07	3302.62	553.902	1320.22	1666.1	2041.57	2166.01	1654.52	1205.05	2321.38	1457.6	1563.09	1074.04	419.543	1226.41	674.68	1216.24	3022.29	7137.96	3156.55	5915.77	5030.91	3725.29	4482.7	3791.26	7385.3	5935.27	43.0288	190.52	2565.36	6868.36	2085.46	461.306	649.304	2435.37	5933.08	6177.64	114.023	950.336	455.101	1519.42	2179.99	1813.69	1188.74
K06131	6637.13	5112.5	5088.26	714.431	1066.18	947.936	4645.09	759.705	2885.63	2792.21	1127.45	1209.44	985.894	662.367	2805.78	1362.29	941.734	673.19	945.604	969.463	235.341	2617.98	2780.23	6230.89	10829.7	3043.79	3840.2	3326.48	6909.04	1619.41	9140.52	4109.86	137.832	422.038	2859.04	7101.21	4436.5	421.537	580.863	2259.73	3807.89	5808.88	42.9313	210.735	133.572	900.268	1993.8	2093.07	979.592
K00088	6049.63	6318.05	6620.91	980.129	1443.75	1691.27	2868.76	536.618	2559.38	2321.55	1873.69	1372.21	1606.45	1415.64	3267.53	1691.52	1673.25	1005.34	1328.19	942.458	454.403	3740.82	3216.69	5469.87	6386.45	6671.46	4324.74	4360.42	4771.36	1638.77	7240.39	2942.35	120.419	413.764	2982.76	7108.81	3701.79	206.486	469.167	1259.59	3708.65	5206.71	116.724	959.157	548.735	1691.72	1856.96	2163.27	1035.05
K03569	5759.01	6656.27	7722.59	712.411	1273.34	1885.39	3038.8	479.22	2070.9	2184.92	1458.47	1430.58	2136.53	624.114	1974.19	1250.06	2212.08	1420.3	1132.83	1109.59	566.884	1309.17	2722.81	9124.87	6985.1	7253.76	4475.49	4614.78	5216.58	1809.27	6724.17	2673.29	142.964	579.132	2814.64	7291.56	3540.44	233.02	481.839	1557.68	3514.72	4707.59	163.881	1206.2	675.998	1421.31	1929.32	1858.52	1147.78
K01624	6404.34	6613.06	6654.57	984.458	2785.22	1953.85	2795.72	421.427	2123.62	2124.31	1841.14	1202.51	1810.43	978.409	4021.88	2100.48	1996.75	764.669	1152.5	956.141	530.559	3807.54	3260.16	4206.35	6510.92	6194.7	4655.67	4179.55	4927.85	1830.54	7645.25	3317.97	148.298	411.722	2913.62	6881.04	3229.69	213.496	492.937	1428.02	3580.07	4974.16	138.271	1180.42	491.375	1248.85	1790.86	2029.66	1248.23
K01866	5825.72	6465.07	6938.7	1464.57	893.742	2141.79	2915.93	540.014	2519.76	2394.08	1981.9	1662.97	1660.3	1268.93	3837.76	2083.91	2088.01	977.575	984.143	907.531	561.472	3212.92	3178.06	3811.98	5993.83	6691.41	4530.44	4157.69	4976.65	1867.83	7057.69	3133.84	105.822	433.638	2851.65	6732.09	3254.51	205.438	392.917	1199.72	3448.48	4375.87	159.681	1944.97	636.069	1451.49	1923.97	2066.07	1543.5
K02931	5899.68	7254.09	7249.52	1165.51	871.709	1817.49	2934.34	545.016	2210.85	2100.1	1458.32	1220.18	1577.08	1453.12	3411.56	1496.94	1664.69	812.548	999.148	702.733	458.077	3573.62	3578.66	4381.13	7069.87	6234.04	4454.85	4238.62	4905.06	1711.22	7661.75	2963.98	135.156	609.072	3028.81	7052.78	3551.73	181.301	516.282	1369.63	3459.02	4666.73	123.941	1309.89	593.415	1460.11	1482.02	1812.93	1249.7
K03551	4800.16	5336.42	5968.03	1235.81	1322.79	2397.65	2530.38	362.35	3025.43	2874.98	2942.87	1880.68	1984.09	837.604	3203.49	1882.83	2217.59	1646.4	1286.91	1137.89	523.006	3430.25	3205.95	8845.11	5581.36	5549.32	3998.81	4499.27	4928.24	1908.04	6705.09	3126.76	121.043	420.516	2784.33	5682.06	3090.74	196.876	418.555	1297.11	3337.98	4759.06	159.036	1528.86	705.168	1856.52	1938.79	2053.07	1512.93
K03040	5765.85	7237.82	6988.49	830.258	1244.8	1683.77	3482.1	589.346	2260.12	2099.82	1401.86	1130.94	1323.18	550.39	3583.53	1796.76	1461.12	607.978	960.148	679.254	352.152	3598.86	3783.25	3307.74	7182.36	6269.24	4598.49	3919.95	4741.7	1904.39	7587.98	3098.73	136.856	483.2	3114.46	7002.27	3577.59	169.157	442.207	1418.34	3804.12	4641.02	87.5754	1176.73	497.205	1107.36	1511.71	1731.28	1115.65
K01885	4960.35	5157.88	6030.03	704.636	1031.67	1669.31	2787.84	477.788	2021.34	2151.73	1670.72	1278.12	1353.23	1161.04	3303.99	1727.29	1873.25	1134.61	966.308	906.375	337.626	1824.55	3186.52	11512.3	6911.29	5552.54	3778.7	4002.6	5470.69	1458.21	6870.21	2794.65	126.006	474.558	2782.32	6095.87	3062.41	280.084	534.182	1728.88	3781.14	6240.8	127.203	784.15	465.664	1630.61	1642.72	1885.64	1320.08
K00789	6341.51	5372.23	4954.29	1321.68	2003.64	2313.82	2927.21	564.686	2861.83	3038.59	2420.69	1650.9	1835.96	1263.3	2888.52	1750.48	1648.68	1294.63	1161.92	1097.57	544.704	3490.77	2978.18	7016.96	6745.19	4257.11	3769.64	3329.48	5618.83	1520.89	8213.98	3139.07	131.252	358.393	2976.78	5984.58	3718.89	226.159	354.574	1370.58	3366.54	5681.76	123.278	1004.82	597.611	1532.16	2059.72	2437.43	1356.23
K02982	5798.21	6627.09	6676.67	767.081	1176.45	1872.21	2967.51	507.6	2902.34	2767.29	1542.22	1148.97	1539.49	1795.08	4136.43	1763.64	1531.55	785.41	1015.89	756.019	430.436	3481.17	3146.5	4666.31	6975.09	5136.21	4174.95	3706.17	4931.23	1237.21	7912.32	3050.33	124.468	472.93	2937.37	6679.14	3709.71	188.349	460.112	1326.87	3262.73	4668.95	111.699	1079.75	503.255	1402.76	1608.34	2019.33	1078.23
K03091	4820.19	2772.08	5572.92	911.437	511.545	2425.29	3508.8	692.897	3529.89	4318.58	1481.48	250.55	717.274	983.906	4007.42	1731.3	2165.49	829.195	88.0189	956.056	217.886	1520.63	2521.27	11920.4	10564.1	1682.53	2331.55	3057.84	9261.74	254.125	9121.66	2543.85	114.59	453.034	2331.26	4878.75	2778.65	372.443	537.169	2596.83	2156.06	5706.43	67.8374	502.716	340.327	2069.82	1840.22	3427.02	1922.49
K02965	6411.55	7034.61	7105.83	1693.79	1269.79	1984.65	1726.4	304.089	2587	2237.8	1635.38	1085.84	1684.7	1488.09	4165.75	1780.73	1515.36	731.928	1041.19	817.712	495.168	2956.2	3070.31	3496.33	7441.66	5392.26	4626.08	3921.35	4601.79	915.45	7678.4	3334.35	165.052	466.113	3080.44	7089.2	2303.18	113.329	514.691	1243.73	3498.35	4530.48	115.879	1934.07	468.203	1197.9	1689.11	2004.93	1598.76
K00962	5210.63	5459.42	6036.49	1075.11	1376.02	1976.32	2851.72	446.015	2637.18	2554.71	1904.46	1539.29	1813.04	702.385	3556.5	1831.88	1821.8	1164.18	1204.09	934.263	527.117	3352.92	3206.52	7422.75	5772.48	6093.91	4227.37	3841.8	4359.58	1619.12	6977.87	3077.35	114.191	462.878	2922.08	6299.33	3089.48	218.872	471.85	1368.74	3275.89	4695.04	122.358	1433.2	665.417	1548.67	1715.16	1876.01	1379.37
K06969	5512.48	4455.47	4968.94	760.133	1139.48	2769.96	2918.62	454.014	3338.88	3484.49	1522.49	1675.3	2270.27	710.192	3239.91	1744.55	1794.56	1276	2302.57	1117.59	406.502	1262.81	2196.65	10751.9	7564.88	4330.95	3323	2931.03	7081.97	1461.57	7253.92	3260.27	134.998	424.273	2664.23	6019.11	3035.79	242.678	423.274	1588.88	3011.39	5512.44	113.176	787.489	430.745	1727.03	1925.44	2370.52	1415.51
K06207	5577.53	5704.26	6348.03	961.978	1340.38	1889.12	3011.13	481.835	2383.35	2382.23	1723.53	1318.04	1742.28	824.652	3318.89	1635.08	2026.19	936.529	1015.4	931.683	513.895	3615.39	3208.9	5554.99	5988.1	5896.14	4301.39	4021.92	4425.67	1758.89	7272.17	3209.43	128.882	465.169	2825.79	6293.28	3290	202.595	417.704	1305.43	3280.84	4620.52	136.642	1207.14	647.927	1488.07	1676.33	1850.47	1328.04
K01876	5461.04	6229.48	6861.4	1027.27	972.028	2015.82	3283.18	497.223	2182.72	2198.19	1703.2	1322.03	1939.35	1128.92	4986.48	2527.89	2071.69	973.628	1167.82	978.39	523.517	3496.88	3095.38	3839.77	6593.58	5221.98	4403.49	3829.05	4115.49	1793.58	7592.01	3220.44	122.284	398.284	2553.03	6112.72	3028.77	159.534	401.443	1191.53	2997.29	3935.31	111.754	1341.79	623.119	1535.2	1644.64	2140.52	1565.51
K00948	4713.89	5790.06	5596	813.948	1274.82	1544.66	2687.89	518.981	3327.03	2750.49	2147.39	1246.92	1574.16	1547.4	3133.95	1581.58	1862.7	888.674	1163.35	898.722	523.625	4574.31	3269.94	5796.32	6356.88	5539.37	3423.8	4353.53	4847.22	1432.61	6215.76	2766.81	126.482	408.214	2692.33	6000.84	3018.24	196.953	376.954	1250.26	3183.61	5197.73	140.827	1073.22	579.125	1453.66	1470.26	1633.16	1132.78
K01689	5329.93	5306.01	5592.31	840.285	820.171	1919.44	2378.99	417.404	2480.64	2210.06	1679.86	1594.96	1970.96	1369.64	4079.43	2134.19	1775.2	896.427	1913.14	1023.18	332.696	3540.95	3214.24	5643.88	6344.7	6605.37	4303.14	4079.62	4956.74	1867.68	7141.52	3233.5	121.327	375.082	2331.66	5895.03	2591.33	190.561	367.946	1231.17	3095.59	4513.59	112.665	838.871	528.213	1505.68	1919.97	2212.99	1051.89
K00762	5325.66	3420.78	4530.21	861.22	1489.03	1892.92	3497.25	614.614	3458.72	3144.99	1779.43	1202.96	1289.69	1485.67	3890.46	1783.32	1405.1	996.567	931.009	1066.18	321.432	3129.27	2992.38	7611.24	7201.29	3233.54	2823.3	2889.64	6426.61	1283.83	7990.03	3262.27	158.931	460.858	2959.75	5885.25	3726.1	282.165	371.328	1733.67	3156.91	6673.84	127.982	627.348	430.157	1518.55	1783.86	2115.9	1304.84
K04567	5221.56	5094.71	5847.5	1056.53	1703.12	1798.02	3256.29	560.918	2471.7	2324.64	1716.8	1266.02	1486.92	1420.96	3252.84	1657.45	1743.08	705.395	1097.87	913.672	373.396	4494.94	3286.68	4708.56	6103.93	5526.06	3870.28	3867.68	5096.29	1838.19	6867.69	2850.08	170.702	475.111	2883.11	6104.99	3366.78	196.809	326.689	1290.86	3227.67	4770.76	92.9365	1287.1	538.682	1370.94	1814.83	1887.8	1193.47
K00059	4640.42	4086.4	4614.6	583.913	791.887	1615.25	3307.61	553.282	3229.83	3070.17	1861.1	1665.92	1739.56	709.912	3058.69	1735.1	1487.31	1096.62	1214.9	1095.16	457.125	3727.42	2823.9	7011.46	6116.7	4335.48	3479.84	3973.77	6418.06	1907.19	8422.91	3453.33	91.5306	274.375	2406.79	5208.82	2734.03	231.761	395.236	1577.28	3771.51	4802.81	87.6525	617.663	435.088	1756.12	1973.4	2468.84	967.277
K02078	6358.94	8092.01	7683.17	298.516	410.509	1263.84	922.143	95.6493	3112.69	2849.25	918.769	983.854	786.635	353.958	3083.09	1407.71	1438.85	542.778	713.676	742.111	169.684	2761.78	3705.06	4762.61	7942.53	4694.98	4280.6	4179.63	6665.82	659.892	7131.57	3705.61	230.921	578.827	3339.02	6959.72	1486.82	262.353	585.166	1808.81	4114.18	5503.41	46.4083	394.882	175.631	1111.06	1248.61	1755.11	975.669
K01784	4900.1	6199.27	6589	825.491	1027.77	1624.58	2851.96	542.315	2420.01	2185.57	1629.95	1101.12	1321.69	580.461	3935.86	1782.58	1420.17	707.858	1772.32	945.631	316.2	4201.73	3143.99	5235.45	6160.41	5417.06	3815.66	3742.95	5282.85	1559.61	6592.85	2767.61	125.206	482.159	2782.28	6295.64	3541.08	244.726	457.216	1258.47	3234.2	5493.84	85.4218	502.724	269.707	1186.73	1808.7	1901.27	876.37
K06942	5444.38	5548.13	6227.9	1177.34	899.773	1956.48	2502.11	400.617	2145.03	2236.57	1570.27	1404.38	1770.67	777.905	3316.91	1746.47	1714.53	1108.14	1001.72	1031.11	486.097	3434.68	3184.77	5332.31	6020.37	5478.44	3890.38	4193.33	4707.76	1876.15	6641.32	3237.48	94.2071	370.526	2740.63	5797.83	2943.59	235.245	436.53	1341.42	3160.44	4594.01	108.282	1271.41	611.64	1679.46	1804.11	1937.98	1334.56
K07137	5309.62	3842.33	5360.19	1248.11	403.54	2679.96	2737.73	482.711	2662.98	3095.99	2131.07	1344.28	1674.77	1553.75	3801.08	1917.78	1898.78	1381.93	1107.78	960.58	526.781	1423.47	2832.64	9392.15	7331.38	3531.71	3383.65	2852.29	6122.99	1287.84	7358.63	3106	122.334	424.114	2458.74	5898.42	2943.88	289.118	377.245	1721.67	2751.89	5138.77	118.904	1080.39	581.948	1782.4	1993.6	2581.16	1811.76
K02992	6068.72	7083.78	6750.72	951.188	1202.33	1464.21	2641.31	410.417	2514.13	2403.83	1735.18	1156.72	1174.62	1826.18	2849.33	1408.59	996.687	675.276	923.007	776.185	301.916	3693.84	3136.15	3196.87	7038.86	4823.44	4417.08	4115.82	4781.91	1527.36	7323.16	3444.47	123.87	421.746	2734.04	6768.91	3366.01	213.99	470.794	1147.91	3400.77	4470.22	115.756	1164.8	429.06	1274.9	1517.48	1769.2	1080.64
K02867	5895.3	6479.03	6861.66	1703.53	1146.61	2084.31	2555.47	486.337	2323.14	2447.69	1503.4	1195.84	1521.33	2154.23	4453.1	2115.03	1267.65	565.179	863.25	862.043	493.963	2965.37	2788.41	3176.3	7169.74	4497.67	4244.32	3376.77	5196.96	1403	7502.96	3252.02	109.089	410.408	2702.34	7257.26	2772.5	223.969	530.218	1328.51	3498.27	3964.8	128.129	1937.61	454.609	1042.73	1441.3	1897.59	1331.84
K03544	5615.49	5833.71	6076.99	1104.36	1343.35	1903.3	3019.01	546.136	2302.42	2337.24	1749.31	1093.01	1530.73	847.59	3065.95	1627.72	1558.72	831.411	967.585	939.285	529.898	3242.6	2854.79	4477.37	6926.63	5117.37	4056.08	3708.35	5082.74	1630.58	7765.89	3211.52	118.179	391.505	2645.96	6419.89	3400.11	187.013	405.472	1238.9	3212.7	4416.23	116.226	1143.68	536.08	1193.73	1722.95	2034.72	1321.91
K01923	5461.98	6404.55	6643.31	625.001	893.9	1401.87	2564.82	433.791	2501.42	2284.83	1690.52	1463.56	1166.26	1622.26	3207.73	1477.13	1791.71	774.704	848.44	872.705	217.164	3386.54	3098.25	3983.66	6989.3	5719.65	4093.48	4336.78	4182.92	1753.03	6435.03	3011.93	108.71	537.701	2744.75	6563.57	3458.59	226.384	433.306	1256.53	3378.96	4737.85	79.692	821.627	400.572	1115.47	1492.45	1687.92	917.399
K00053	5305.95	5121	5783.27	1074.35	1299.69	1597.7	2766.42	472.81	2296.62	2356.27	2726.46	1336.9	1221.21	1011.39	3547.62	1868.27	1587.53	617.256	1099.99	787.424	296.028	3283.31	2949.44	4773.77	5826.71	5527.63	3718.71	3568.71	4411.5	1805.56	7149.33	2867.42	117.965	402.722	2756.54	5895.28	3041.5	198.102	360.788	1268.49	3080.76	5233.98	73.702	1617.94	436.12	1401.25	1945.05	2189.29	1029.76
K01756	5291.71	5587.45	5893.54	1053.04	1106.3	1525.29	2839.46	486.389	2814.92	2511.96	1709.49	1273.16	1393.84	856.736	3351.74	1652.17	1428.55	1041.17	1075.02	855.554	394.946	3919.22	3360.9	5341.48	5732.05	4817.66	3724.22	3669.03	4003.36	1769.17	6932.94	3092.29	117.227	417.481	2740.75	6142.1	3616.61	204.533	349.149	1215.42	2998.5	4494.54	118.157	1102.73	598.044	1539.66	1518.13	1807.54	1046.26
K01880	5926.72	5416.99	6197.62	1589.37	649.111	2385.08	2675.78	483.487	1595.01	2058.65	1700.5	1184.52	1556.42	1154.82	4122.31	2057.83	1847.05	835.925	962.611	877.023	466.307	175.002	2268.22	4337.02	6210.47	5025.88	3997.76	3541.64	4199.68	1638.66	7981.71	3280.47	95.6441	413.372	2584.55	6157.66	2902.24	228.425	409.151	1312.16	3437.54	4537.16	96.2788	1622.34	581.749	1469.01	1886.56	2250.28	1662.6
K03654	5540.51	4759.38	4654.64	290.022	1645.2	1126.1	2981.69	424.323	1320.25	1378.47	1214.32	1847.05	1814.79	286.384	2003.08	1197.77	1112.27	731.874	1737.03	1083.78	362.151	3046.14	3319.55	5463.48	3748.9	6123.26	4519.35	3371.37	4214.64	3259.23	7967.74	4423.02	86.4201	318.356	2634.81	7087.69	2181.89	368.944	514.691	1713.41	4525.2	4581.01	86.0947	761.073	331.377	1080.57	1935.41	1718.55	738.844
K00384	3675.06	2846.62	3714.65	1086.45	680.479	2132.32	2485.62	510.227	3336.51	2990.16	2509.85	1122.56	1247.05	916.693	1807.34	1170.73	2102.97	1705.67	1119.54	1063.93	698.269	1974.93	2012.5	15179.6	5485.23	3721.71	2649.06	3189.08	6850.89	1006.29	5143.1	2511.74	109.55	431.366	2510.15	4648.89	2603.39	213.097	451.984	1762.9	3411.6	5574.13	97.9753	1040.53	593.994	1849.12	1485.7	1823.04	1955.46
K21071	5116.47	3118.99	4589.16	859.094	740.079	2542.57	2869.74	437.805	2973.53	3318.37	1568.61	966.386	1592.31	888.474	3186.78	1506.54	1795.6	1225.49	1650.21	916.222	355.669	36.7042	2425.56	9990.62	8075.87	3281.98	2753.84	2103.87	6739.63	1135.39	8170.08	3117.65	91.5691	422.82	2469.25	5533.58	3426.45	244.872	364.534	1698.29	2746.32	5839.06	134.14	670.223	417.138	1515.94	1922.49	2616.59	1484.03
K01939	4728.75	3620.62	5070.8	711.193	998.53	1660.98	3002.76	477.321	3063.51	2671.49	1755.08	952.64	1213.6	900.526	3183.4	1446.81	1421.88	632.381	1085.95	842.846	280.419	3803.96	3245.47	7700.62	6950.98	4299.26	3034.82	3402.87	5842.34	1414.17	7324.21	2702.69	137.448	502.326	2937.94	6142.93	3086.79	216.512	408.009	1557.48	2703.28	5073.79	101.577	766.032	402.95	1269.02	1619.22	1632.32	1097.86
K02028	3552.72	3195.18	3768.18	1747.19	855.188	2786.64	1820.83	496.395	4128.75	3904.98	2598.08	528.038	1040.97	1318.26	4564.67	2033.72	1967.34	1257.57	999.438	819.423	329.892	6253.95	3060.51	7333.37	6180.22	3483.05	2247.65	3415.54	6531.35	293.108	5791.82	1876.65	90.7557	320.725	2592.99	4137.59	2404.86	149.735	267.805	1003.65	2282.03	5653.39	104.19	810.521	527.566	2299.15	1431.32	2592.88	1744.68
K01006	6040.73	5024.35	5972.7	1972.94	817.165	2624.08	2928.33	474.095	1748.15	2188.6	2035.17	1543.5	1943.08	1396.29	4897.41	2452.35	1811.13	1032.93	1205.47	916.386	568.835	131.175	1988.33	4404.28	5876.86	4710.73	3800.86	3040.12	3747.22	1751.74	7500.26	3180.73	88.1269	339.647	2323.2	5895.42	2852.04	183.467	352.844	1347.12	2813.39	4080.41	112.922	2896.87	753.843	1522.24	1809.46	2191.99	1871.72
K01358	5678.96	6280.12	6360.66	1076.42	1177.7	1713.84	1909.05	334.742	1776.38	1915.91	1597.1	1402.87	1572.73	703.189	3310.87	1667.77	1625.22	802.621	1025.8	789.445	518.057	3147.1	2834.55	3527.94	5999.16	5655.19	4303.74	4265.77	4016.67	1342.99	6951.65	2835.65	156.695	401.191	2838.97	6290.44	2858.9	161.64	431.812	1070.52	3116.02	4400.11	144.683	1564.29	501.588	1171.21	1514.64	1903.7	1309.28
K00975	4783.5	3911.34	5250.46	910.991	1482.65	1901.66	3639.2	895.693	4390.7	4151.04	1950.1	185.909	602.737	1013.16	3525.84	1497.17	1357.78	470.503	110.967	807.391	310.518	2104.12	2316.38	5972.72	9721.53	2344.6	2134.9	3045.91	9093.51	299.217	7157.41	2028.77	174.283	529.981	2625.63	5029.86	3838.15	195.479	287.198	1543.82	2253.1	6194.93	74.1339	453.725	239.418	1093.91	1735	2443.69	1321.8
K00928	4802.04	4588.66	5288.75	772.988	993.353	1537.75	2834.62	480.265	2458.2	2215.87	1815.45	1108.91	1267.34	706.312	2887.67	1501.84	1614.8	663.502	959.608	792.165	304.691	3241.64	3141.74	6227.92	5598.4	4885.32	3325.83	3735.52	4924.32	1758.57	6486.57	2739.12	107.485	373.478	2801.74	5918.37	3100.51	252.08	374.407	1442.84	3132.28	5550.02	133.655	761.8	398.812	1322.63	1508.7	1483.29	859.366
K00874	5533.89	5006.19	6386.85	1188.93	1572.48	1754.43	2825.5	326.505	2277.28	2191.37	1813.98	1052.83	791.735	572.003	1555.4	1002.09	1763.79	862.185	179.651	822.953	211.182	1033.6	3140.65	7039	6507.09	4822.04	3658.66	2975.85	4117.99	1077.31	7079.39	2658.26	115.253	623.088	3154.76	7582.11	3260.83	276.639	578.468	1700.16	4382.65	5103.84	87.6557	462.403	310.705	950.311	1803.09	1703.62	1037.29
K03671	4122.08	3228.35	3819.65	731.556	902.226	1527.95	2582.77	451.854	3535.89	3735.77	2186.59	790.166	730.377	818.501	2334.55	1309.97	1639.19	789.936	749.995	927.66	277.083	4531.99	2776.06	7055.16	6849.24	2772.42	2624.61	3567.84	7064.07	993.587	7748.56	3705.68	83.9865	431.754	3161.84	5599.18	2673.02	281.539	449.812	1667.67	3026.4	5284.56	77.2252	456.258	292.54	1421.65	1703.96	2118.06	1288.44
K01872	4482.13	3763.54	4778.18	701.05	851.77	1589.85	2755.47	507.159	2880.2	2795.29	1415.89	1167.18	1334.15	1034.13	2216.42	1252.77	1729.94	1294.32	980.944	921.697	298.391	3147.78	2959.96	10941.2	5941.79	4200.67	2937.52	3496.6	6237.24	1490.14	5851.6	2641.09	117.531	387.101	2363.81	5046.35	2716.6	257.577	398.226	1649.49	3065.41	5033.08	92.0216	763.541	356.472	1320.56	1567.69	1776.85	1144.81
K01610	6036.88	6549.57	6836.26	752.256	1001.46	1394.88	2926.19	440.546	1326.81	1685.96	1439.29	913.863	1072.17	531.043	3573.88	1675.87	1577.31	481.058	122.843	799.414	305.527	2899.85	3354.59	2487.05	6657.95	5825.15	4665.9	3685.53	4144.82	1667.75	7803.78	3335.31	161.738	476.589	2568.37	6632.75	3230.3	227.435	492.054	1403.98	3570.11	4116.64	62.4006	626.689	322.727	801.551	1622.16	1944.89	1186.19
K02952	5174.02	6298.02	6695.42	879.145	838.112	1480	2150.85	350.915	2075.59	2059.71	1184.69	947.474	1111.27	998.323	3381.46	1587.12	1358.45	390.746	815.161	645.279	491.712	3207.61	3368.62	3325.1	6581.51	5938.06	4134.94	4238.67	4283.08	1090.09	7134.71	3061.52	141.512	408.284	2946.3	6350.41	2681.73	184.631	490.984	1118.66	3298.34	4384.09	83.3136	1661.75	498.937	978.459	1258.33	1343.49	929.618
K01104	3384.26	2092.93	3098.35	493.235	604.934	1515.14	2664.4	534.408	3548.73	2880.81	1365.75	1148.29	1070.34	709.017	1463.13	897.922	1577.58	1024.16	1423.5	817.04	129.948	6106.79	4001.52	12072.5	6564.95	3632.04	2123.05	3151.25	7536.97	581.483	5413.86	1773.72	135.833	345.012	2586.67	4141.4	2886.46	390.943	470.069	2187.76	3110.92	5959.28	67.9415	168.694	179.075	932.652	1623.1	1965.86	1181.98
K03070	4664.64	4896.6	4986.81	884.292	1208.24	1720.68	3011.4	526.669	3216.96	2773.43	1550.53	1459.41	1667.01	1589.09	3007.7	1513.1	1588.37	867.395	1098.8	947.075	442.396	3803.62	2694.43	5028.92	5644.32	4822.28	3544.03	3372.29	4912.96	1615.51	6334.16	2841.94	119.223	336.862	2595.88	5677.8	2933.04	184.952	350.15	1334.47	2971.17	4194.4	100.524	1219.72	544.409	1499.58	1607.25	1858.35	1162.81
K01868	5256.85	4554.87	5376.65	1165.76	930.33	1835.47	2820	413.564	2398.99	2359.19	1652.27	1140.32	1610.95	1211.45	2821.53	1470.35	1723.53	841.431	1037.48	909.356	444.659	3412.74	2999.57	3994.96	5899.2	5016.38	3639.94	3292.7	4400.79	1769.98	6934.1	3046.14	112.427	415.053	2570.52	5700.64	2810.34	216.192	387.301	1323.55	2878.42	4648.53	119.336	1276.62	620.426	1395.56	1747.6	1978.82	1421.54
K03695	5135.95	4582.21	5018.26	913.01	1445.7	2127.9	2780.15	460.822	1833.36	2121.98	1755.03	1387.78	1899.76	1041.09	2441.69	1493.77	1978.68	1009.05	1262.53	907.824	443.317	1472.1	2294.69	5934.3	5625.75	5159.36	3600.85	3688.62	4786.12	1587.95	7081.41	3042.59	110.414	349.589	2367.91	5221.52	2861.84	172.2	328.728	1197.72	2837.22	4566.4	137.091	1027.56	639.062	1735.98	1707.18	2012.24	1349.68
K01810	5051	5592.48	5916.98	676.109	1116.33	1412.06	2776.48	488.883	2607.05	2313.33	1821.41	1142.23	1106.12	1303.75	3129.23	1542.87	1575.95	802.609	1038.79	761.149	295.214	3752.09	2935.89	3817.82	5881.33	5412.34	3457.84	3612.65	4355.78	1706.93	5970.91	2866.54	117.073	420.272	2507.3	6002.88	3225.54	196.593	397.031	1145.12	2933.36	4216.5	81.8604	689.705	404.171	1331.4	1688.11	1723.83	836.006
K01755	4816.65	5295.69	5921.28	768.315	976.042	1586.58	2680.88	407.766	1717.22	1723.02	1481.97	1058.8	1149.99	652.368	3670.5	1722.95	1937.8	814.16	1146.07	700.335	297.056	3005.98	3127.99	6943.29	5503.02	5490.12	3487.33	3873.57	4228.84	1546.19	6161.95	2710.82	130.123	449.074	2460.78	5558.29	3219.64	201.897	418.505	1257.24	3056.77	4428.44	89.3161	678.45	382.492	1403.46	1501.31	1641.85	868.959
K02837	5140.74	5607.48	6567.83	520.185	1081.65	1545.13	2336.52	379.237	2177.83	2041.68	5076.03	1172.69	1212.13	545.06	3002.05	1418.66	1844.67	660.884	234.342	847.341	391.551	3184.17	2995.54	5144.1	5769.74	4563.02	3943.03	3917.54	4467.51	1463.44	6280.8	2735.74	127.282	482.55	2611.94	5991.89	2831.23	171.864	457.048	1216.36	2864.41	3884.95	91.7944	983.731	527.511	1493.96	1301.63	1569.98	1161.41
K02986	5218.17	6290.35	5684.77	445.42	799.33	1285.88	2876.76	480.743	2152.06	2156.64	1134.39	1012.97	1291.8	480.05	1963.5	1013.77	1379.46	645.214	777.482	635.869	369.608	3644.24	3180.08	3852.87	6469.28	4737.33	4105.54	3906.84	4357.13	1667.07	6880.91	3037.48	124.8	485.94	2970.72	6335.05	3390.58	255.243	625.848	1368.84	3446.73	4333.81	74.3769	944.688	432.761	1163.1	1237.15	1382.19	880.642
K03596	5175.8	4803.16	5115.92	867.484	1194.73	1893.62	2290.79	352.573	2400.77	2443.5	1766.72	1077.46	1484.29	1327.72	2471.99	1424.21	1548.18	1236.72	1012.08	936.142	435.989	3181.66	2781.16	6126.08	5747.24	4608.12	3515.44	3495.14	4133.87	1413.22	6651.32	2895.95	106.15	401.618	2622.97	5786.63	2887.51	168.732	315.809	1153.86	2834.93	4579.39	145.951	1357.05	664.721	1431.55	1530.12	1790.76	1254.89
K01952	4227.62	4389.64	4925.07	935.59	1155.85	1866.99	2551.89	418.749	2588.94	2256.18	1575.13	1670.34	1808.85	761.193	3180.76	1596.14	1656.43	1022.04	2068.5	950.414	337.896	4080.02	2863.22	6143.94	5014.91	5214.97	3339.96	4112.13	4046.36	1503.45	5833.11	2847.15	101.97	348.91	2362.5	5158.27	2510.88	181.012	356.36	1209.71	2969.54	4166.97	102.97	802.132	482.216	1440.33	1682.87	2025.44	993.589
K00773	4892.87	5060.02	5767.02	860.257	1013.38	1623.22	2303.39	442.425	2564.87	2257.45	2102.49	1406.52	1607.21	713.956	2902.66	1541.27	2443.02	830.61	1072.77	929.777	407.025	3358.19	2837.84	4955.62	5257.98	5354.81	3788.2	3852.71	3811.07	1618.68	6175.81	2674.93	110.918	443.893	2414.27	5706.38	2757.75	185.996	334.861	1097.75	2790.52	4231.31	116.682	1089.68	505.909	1364.97	1569.28	1715.05	1048.68
K01933	5159.44	5678.52	5995.51	682.761	1081.8	1552.02	2360.02	362.946	2488.52	2242.53	1703.58	1276.81	1566.66	1155.04	2398.84	1306.2	1685.67	812.174	1049.15	892.56	367.885	3028.55	2872.84	4813.88	5240.48	6145.71	3782.76	3638.74	3884.1	1680.08	6220.5	2735.59	104.095	511.999	2594.73	6282.67	2681.79	223.602	362.464	1132.22	2906.25	4109.93	99.5127	1004.42	427.531	1364.97	1593.26	1578.2	938.307
K00764	4786.73	3737.23	4123.67	739.893	1029.02	1580.05	3085.38	474.672	2636.35	2445.13	1446.86	1669.11	1310.14	594.143	3566.66	1802.06	1363.75	940.897	1069.05	1015.33	257.922	3608.88	2942	6020.73	4882.69	4322.76	3493.2	2845.65	3790.43	2310.68	7758.66	3746.64	98.2974	246.269	2711.14	5883.09	2627.48	266.328	330.2	1192.16	3276.01	4645.64	95.8067	655.413	352.371	1600.41	1720	2050.24	1049.38
K04077	5103.16	5117.82	5325.94	920.918	1150.79	1759.12	2466.16	384.575	2534.99	2357.72	1624.29	1244.31	1687.24	1473.33	3529.74	1836.22	1549.61	935.695	1148.29	981.867	512.503	3323.14	2668.25	3324.08	5423.6	5082.35	3703.45	3910.81	4142.73	1498.86	7007.45	3066.36	96.5553	319.278	2493.18	5634.78	2580.12	161.889	385.898	1148.79	2971.48	3915.16	113.078	1662.28	628.64	1486.83	1423.67	1810.28	1239.91
K16785	3608.05	2572.34	3362.26	1231.12	1590.6	2205.62	1817.81	422.721	3546.03	3133.67	1708.98	666.559	664.372	1303.65	2567.53	1207.37	2012.6	1670.26	327.309	826.643	605.277	4354.08	2632.38	6421.59	5613.04	2217.56	1929.86	3181.08	5458.53	460.302	10252.6	1585.86	188.053	378.956	3335.88	5694.79	3092.38	150.017	222.867	1085.98	2139.96	5266.56	63.1676	429.633	293.974	1545.87	1921.67	2575.31	1609.43
K02890	5613.58	7268.64	6563.62	742.333	566.716	967.486	2035.62	385.999	2242.82	1965.6	1202.1	976.934	1359.38	895.484	3313.54	1499.3	1067.5	517.157	555.118	673.642	430.37	3003.03	3041.04	3142.55	6250.48	5028.35	4317.43	4067.98	4235.87	1297.11	6671.64	3170.51	131.733	434.684	2629.59	6390.11	2473.37	189.478	454.141	1327.78	3457.39	4207.97	97.2626	886.72	367.086	927.915	1603.26	1533.27	737.576
K03530	6401.46	4342.19	4179.1	245.596	333.773	1430.12	1811.28	289.506	2245.9	2281.02	1344.91	1664.96	1691.51	413.788	1870.32	1161.02	1254.9	589.604	1020.38	821.063	234.193	2412.47	3156.58	5195.01	5995.33	3781.48	4463.48	2042.65	4557.64	1476.48	9677.88	5067.79	113.557	268.217	3471.86	7263.61	2214.75	357.402	458.238	2078.61	3482.36	4775.61	51.9515	422.998	221.8	1073.33	1802.9	1774.65	1028.55
K00826	4985.32	5189.02	6107.04	560.787	1041.14	1317.26	2719.67	396.373	2023.65	2003.38	1768.12	1111.7	1063.56	707.451	2871.82	1482.66	1660.09	529.496	816.845	779.255	193.175	3189.51	3150.9	5246.51	5636.37	5639.3	3623.99	3643.01	3993.03	1265.72	6858.37	2419.09	114.464	508.559	2497.03	6305.25	3246.84	245.751	409.064	1133.89	3005.88	4534.54	79.0615	817.74	247.504	1042.93	1481.46	1750.8	751.639
K01867	4979.21	4795.43	4912.82	608.757	999.417	1457.81	3035.56	507.666	2163.91	2011.78	1621.08	1143.22	1506.85	749.266	2710.58	1425.71	1641.52	672.175	857.889	874.031	414.078	3571.89	2888.89	5330.53	6126.94	4042.33	3419.44	3474.89	4944.4	1586.44	6383.76	2974.35	135.313	395.743	2764.63	5388.19	3130.9	221.969	390.231	1337.95	2995.52	4701.29	109.953	861.865	519.851	1201.52	1632.26	1741.3	1038.33
K01869	4927.08	4956.76	5121.51	1062.87	1180.47	1631.26	2677.66	429.481	2634.71	2315.51	1530	1285.02	1498.73	1033.64	2630.66	1492.94	1584.85	847.624	1132.12	881.531	463.749	3218.19	2822.91	4268.98	5403.95	5046.23	3642.35	3627.93	3965.72	1639.47	6774.66	2819.63	121.979	394.592	2652.34	5693.7	3064.97	205.236	351.16	1178.75	2885.55	4164.27	114.348	1380.38	450.308	1110.55	1545.36	1657.3	1128.31
K02948	5344.95	6074.2	6633.65	1324.68	1029.72	1971.69	1380.73	216.9	1860.97	1769.75	1371.71	1010.75	1250.25	669.231	2492.91	1308.98	1423.28	852.601	784.077	656.362	485.619	2543.62	2747.18	4251.58	5691.87	6116.35	4156.63	4144.54	4102.61	1168.56	6423.16	2843.14	112.895	446.125	2734.98	6328.96	2175.46	214.805	453.564	1314.66	3303.74	4041.13	142.962	1475.61	547.234	1217.86	1164.79	1468.56	1317.7
K02954	5208.39	7112.48	6098.16	1427.23	1333.31	1393.83	868.301	30.1665	2031.84	2141.67	1306.76	1198.98	1431.27	1636.12	2721.55	1465.6	1208.12	625.542	1007.34	769.029	532.338	3504.52	2979.2	4028.8	6778.46	5004.48	3969.17	4390.81	4604.38	861.706	6604.71	3093.55	171.244	391.64	2824.84	6120.95	1324.78	179.928	475.149	1100.34	3493.66	4147.64	142.137	1893.75	639.947	1297.56	1287.46	1458.01	1151.82
K02994	5085.77	6373	6488.62	753.784	839.223	1306.93	2292.38	382.108	1872.15	1930.6	958.368	952.317	1024.59	692.755	3411.05	1510.63	1043.09	474.289	957.034	700.735	367.373	3290.52	2995.2	2725.85	6120.39	4995.7	4161.26	3391.59	4117.65	1373.21	6845.33	3322.48	121.586	467.519	2766.29	6493.45	3317.62	222.354	439.15	1236.75	3134.74	4145.49	50.6081	917.316	462.008	1027.48	1237.78	1288.49	767.25
K03737	5367.54	4733.47	5244.62	1110.6	1223.6	1967.92	2768.18	419.243	1762.86	2151.32	1293.91	1486.59	1758.85	1352.33	2423.82	1341.61	1528.1	915.703	1188.59	943.367	547.217	2497.66	2968.57	4045.32	5772.31	4950.16	3656.48	2791.3	4395.8	1964.7	6576.34	2849.33	110.919	437.91	2604.11	6003.88	2876.34	235.579	424.094	1258	2914.68	4379.55	105.554	1508.93	546.11	1253.51	1598.72	1837.32	1418.81
K03553	4575.24	5076.98	5142.25	1020.1	1320.86	2045.55	2170.5	349.985	2562.84	2401.25	1710.38	1246.18	1755.3	1317.05	3385.27	1776.75	1694.29	1034.87	962.706	895.531	536.627	3280.74	2614.34	6017.04	5210.91	4629.46	3503.58	3462.18	4285.22	1238.13	6403.59	2797.65	135.291	332.91	2404.97	5016.24	2436.95	140.961	311.553	1067.01	2802.39	4172.81	92.7074	1338.42	672.527	1799.22	1582.31	1773.79	1246.64
K01652	3875.77	3338.49	3676.47	903.44	2633.89	1603.79	3308.88	550.857	3206.52	3077.43	1938.5	1238.23	1010.43	592.943	3036.91	1536.47	1484.83	1095.59	891.354	951.828	307.234	5347.09	2484.24	7682.37	5221.32	3441.38	2506.18	2680.26	6212.05	1484.57	6157.82	2759.18	136.517	353.65	2496.91	4518.03	2574.88	200.554	297.807	1384.21	2662.46	5007.07	73.6545	485.782	243.411	1424.27	1861.79	2284.79	966.424
K06158	4505.79	5331.73	5554.17	317.915	935.334	1468.73	2535.03	343.873	2165.4	1867.71	1439.17	1602.71	1837.13	565.341	1843.13	1102.77	1634.06	787.897	1691.05	1017.7	287.968	2914.77	2979.53	4366.78	4395.79	6326.44	3896.28	4107.24	5016.8	2074.41	6408.17	3720.06	104.122	394.859	2762.95	6230.17	2363.16	237.598	451.567	1350.24	3599.52	3443.95	85.4315	626.392	362.397	1145.04	1636.22	1614.5	662.254
K02863	4949.87	6272.55	5974.16	1179.18	1071.52	1666.13	1730.03	255.126	2035.17	1992.21	1393.03	929.777	1300.2	1343	3344.58	1601.52	1484.66	609.875	908.592	773.186	462.069	3261.76	2761.01	4381.26	5428.77	5831.81	4162.25	3532.5	4172.28	1174.41	6593.08	2781.93	102.65	362.59	2351.95	6059.92	2099.77	206.103	500.066	1214.9	3180.15	4067.72	88.5116	1416.26	475.561	1072.06	1357.92	1628.71	1130.61
K00951	5006.74	4545.54	4574.25	446.059	990.171	1088.61	2647.47	391.465	2511.46	2157.28	1518.26	2035.18	1367	921.566	2294.9	1337.87	1484.09	884.765	282.049	960.339	387.512	3379.86	3020.9	4365.26	4546.34	4524.57	3877.88	3426.31	3937.42	2321.26	6765.44	3768.71	99.2892	308.993	2553.43	5874.62	2491.48	231.793	377.673	1286.48	3169.61	4336.96	123.026	996.208	512.229	1327.45	1664.58	1619.41	931.595
K01572	5826.45	4618.86	5159.79	778.494	643.134	1910.9	2234.01	329.577	1832.24	2064.38	1585.84	1029.4	1186.14	660.437	3186.9	1674.23	1566.37	627.599	873.938	947.012	238.383	90.1174	2485.52	5156.15	5690.98	4398.9	3759.57	2907.03	4341.06	1469.36	7677.32	3836.23	93.7623	418.296	2802.49	6594.96	2444.04	302.329	449.373	1275	3253.27	4674.82	56.6512	448.523	207.288	1113.56	1982.03	2010.14	1054.22
K01873	4728.81	4219.55	5192.23	1025.42	1160.36	1711.55	2756	472.509	2452.76	2449.72	1642.45	1174	1304.62	1367.72	2711.61	1421.51	1780.74	808.631	983.39	860.88	436.327	3317.94	2745.84	4689.66	5629.53	4415.56	3330.55	3136.54	4364.34	1570.85	6099.75	2734.14	135.946	394.865	2483.27	5423.09	2935.67	180.002	318.581	1107.36	2669.31	4179.12	116.561	1300.86	508.469	1287.4	1569.86	1812.31	1272.19
K07484	3235.85	4421.04	2133.28	230.601	11725.9	202.408	3620.96	331.967	1570.55	1268.15	1010.04	914.492	718.254	179.796	2748.79	1543.48	517.175	126.397	77.5092	1218.77	88.0581	7892.93	3578.1	320.284	3046.04	3831.74	4963.8	1872.83	1545.81	1532.82	7061.52	2714.37	252.157	281.793	2070.07	2694.23	2831.42	1606.05	2141.06	6420.21	16177.8	3205.58	76.7124	116.563	39.8176	147.481	2016.04	1826.51	197.795
K02906	4650.45	5120.86	5737.49	792.5	1013.51	1300.15	2473.34	426.691	2486.63	2227.8	1345.86	1035.76	1140.65	1271	3489.15	1673.38	1200.63	679.553	911.797	690.71	303.524	3005.59	2839.88	3603.03	6273.66	4715.71	3903.1	3519.19	4656.62	1442.77	6325.44	2889.57	111.077	435.6	2389.27	5866.13	2521.97	210.729	399.792	1406.82	3374.23	4500.39	93.7056	729.375	323.002	1033.18	1541.09	1768.34	847.91
K07258	2504.98	1992.81	3095.34	527.838	1465	2037.36	3280.71	556.552	3937.12	4173.51	1043.1	256.224	829.53	683.67	2344.67	1112.37	1531.51	1683.32	853.746	821.99	102.249	4553.13	2289	13453.5	8069.42	1713.6	1352.53	2513.95	8851.11	421.49	5413.46	1885.94	164.959	395.789	2098.61	2715.72	2345.35	285.299	476.212	2380.59	2354.97	4984.56	66.1748	143.584	204.418	1436.55	1337.7	2265.9	1504.15
K02874	5133.59	6071.23	6054.54	1270.71	1047.97	1854.34	1178.46	158.687	2287.47	2124.04	1240.39	1205.62	1356.4	1801.06	2662.27	1338.83	1600.48	879.292	595.461	714.284	495.013	2414.55	2746.89	4040.52	6389.45	4965.57	3870.42	4214.7	4729.03	436.021	5768.95	2557.9	95.9603	421.761	2413.2	6117.53	2136.97	230.601	534.687	1137.02	2944.87	4234.54	112.887	1414.36	652.711	1195.33	1428.58	1665.04	1394.12
K00700	4363.34	4305.67	5046.01	465.552	1066.6	1415.15	2972.49	469.502	2324.21	2466.53	1051.22	902.227	980.138	628.374	2485.45	1148.72	1531.65	682.516	890.265	675.584	216.273	1519.22	2380.56	7850.96	6644.2	4110.34	2774	3261.69	5335.86	1295.3	6203.03	2485.77	114.202	397.134	2393.74	5378.95	3007.69	239.976	389.408	1499.36	2815.57	4919.34	65.6503	556.85	263.117	1130.17	1324.9	1787.6	1072.34
K02356	4514.52	5161.42	5587.4	992.745	1778.64	1507.29	2876.65	445.621	2197.57	1846.42	1334.5	1142.76	1280.36	1804.02	3291.27	1613.74	1405.33	607.006	973.706	842.341	371.577	4134.56	2943.01	2420.58	5320.17	4872.18	3956.79	3246.41	3772.54	1610.35	6400.22	2720.28	130.405	413.93	2587.8	5688.4	2440.06	215.405	352.27	1199.47	2714.3	4125.46	78.5958	1730.54	429.396	857.015	1399	1522.58	947.953
K02314	4065.59	3802.54	3809.57	569.164	1196.53	1548.19	2781.6	455.632	2509.98	2333.09	1515.49	1959.96	2175.83	1097.86	1973.76	1269.3	1424.95	1137.7	1909.72	1009.31	467.994	4120.36	2886.55	4901.25	4830.8	3963.83	3054.18	3008.71	4559.5	1863.69	6162.07	2541.23	100.166	342.226	2620.21	5106.36	2907.82	240.108	312.533	1347.14	2610.45	4229.73	111.347	853.683	527.221	1464.6	1940.38	2088.32	1063.43
K01883	4519.23	4344.35	5223.02	766.276	868.505	1637.96	2396.33	404.888	2269.33	2247.16	1716.16	1427.86	1376.58	656.467	3159.17	1656.03	1824.39	1118.53	1084.78	874.396	373.185	3073.23	2868.15	4876.99	5081.54	4748.24	3538.04	3866.77	4116.8	1456.16	6168.06	2711.26	116.578	378.081	2510.05	5110.72	2765.48	180.706	328.069	1222.82	2747.12	4012.31	121.6	852	438.15	1280.27	1464.36	1587.86	1162.98
K02967	5452.99	5794.66	5893.82	941.28	1205.32	1540.42	2364.32	419.944	1952.72	1993.8	1629.4	1138.69	1436.2	683.835	3543.38	1794.36	1514.6	496.929	927.126	712.309	489.434	3031.02	2630.35	2781.04	5564.58	4717.25	3805.16	3468.44	3681.04	1251.92	6664.03	2889.59	104.578	449.396	2521.9	5799.72	2553.1	159.725	375.354	1104.16	2940.01	3673.48	71.204	1195.59	436.206	916.165	1498.16	1685.93	1027.82
K00850	5301.26	4913.4	5107.67	288.836	1157.45	1175.22	2832.55	382.431	2070.64	2044.98	1328.79	1875.81	1346.51	376.964	2455.66	1405.36	1458.52	958.605	964.401	795.551	338.377	2918.84	2836.11	3610.22	4348.19	4678.83	3592.69	3084.32	3569.69	1953.01	6796.09	3405.06	95.327	349.211	2557.72	6531.35	2833.2	217.189	420.148	1176.37	3626.96	4139.23	66.0373	534.196	320.3	911.518	1715.32	1717.82	819.48
K02600	4329.37	5048.75	5110.6	609.479	1083.84	1308.54	2445.15	399.649	2127.67	1970.44	1326.8	1415.61	1821.58	734.09	1861.48	987.578	1334.3	847.808	1201.46	848.929	383.545	3287.55	2807.59	6576.63	4297.84	5103.54	3596.61	3705.72	3621.25	1620.67	5653.09	2725.44	111.532	376.013	2399.22	5345.67	2710.54	199.45	398.388	1236.09	3212.57	4237.9	110.154	1003.75	558.204	1506.13	1334.24	1632.44	969.622
K01835	4260.18	3666.71	3953.07	825.173	1067.47	1820.17	2675.19	481.774	2861.79	2711.5	1917.47	840.783	1166.35	2033.26	2277.36	1243.69	1474.37	531.559	836.049	801.718	287.078	2953.15	3033.87	6121.98	6026.6	3395.87	3114.51	2835.38	5256.77	1314.85	6509.6	2702.68	111.719	358.198	2238.2	5173.55	2944.93	240.051	363.062	1471.09	2611.27	4917.2	99.7917	517.284	366.345	1138.08	1759.95	1834.79	1452.37
K00876	5467.18	4019.85	4883.23	297.21	604.99	1182.26	2494.77	314.74	2177.26	2086.24	1046.16	1490.01	1287.23	322.933	1824.64	1153.25	1456.64	956.398	197.979	1034.89	310.617	1221.33	2565.91	7677.39	5153.45	3729.82	3660.71	2876.77	4269.32	2674.81	5983.35	3980.2	91.5776	356.515	2279.52	5786.6	2098.51	332.38	475.076	1766.13	3519.33	4943.16	120.019	927.262	459.907	1384.63	1397.11	1381.04	1009.15
K01790	4788.07	6876.32	8214.48	594.542	518.783	984.376	2117.11	346.454	2360.61	2026.24	1610.81	644.179	498.527	1025.27	2785.83	1262.72	1271.85	824.472	170.467	720.788	237.882	908.677	2671.16	4625.54	5876.59	5841.02	4445.02	4467.97	4236.85	1068.09	4920.48	2431.07	90.5818	426.385	2189.96	5446.83	2658.42	143.416	522.634	1244.33	3772.2	4155.87	37.7677	155.641	110.533	503.049	1873.84	1567.6	814.399
K00927	4707.3	4455.88	4816.25	911.693	1355.98	1588.5	2537.88	439.917	2489.24	2294.33	1703.23	1181.03	1452.67	1551.34	3596.59	1813.57	1598.75	828.681	967.972	707.433	413.312	3173.03	2619.6	3657.5	5243.1	4048.43	3447.46	3139.26	4023.19	1213.09	6717.36	3028.2	115.884	333.815	2269.32	5269.38	2488.7	176.848	362.765	1147.23	2646.78	4064.69	89.9516	873.812	515.966	1381.3	1742.72	1998.25	1202.39
K03310	4672.29	3966.42	4168.24	812.289	948.388	1706.29	2036.2	432.146	3089.71	3163.36	1763.12	770.826	892.196	860.709	2292.14	1322.51	1704.48	1247.56	594.591	816.238	252.32	2318.81	2595.31	8915.52	7852.39	2524.18	2649.4	3148.23	8635.44	553.948	6192.79	2520.45	89.909	301.199	1950.17	4175.41	2079.61	206.051	311.022	1573.8	2831.42	5083.16	71.3188	313.05	200.687	1156.09	1577.71	2246.58	1369.97
K02996	4935.08	5769.23	5856.06	1207.25	1239.33	1792.28	1658.04	220.949	1876.25	1832.07	1652.38	1018.34	1433.46	1318.79	3372.81	1720.83	1526.76	684.055	808.293	946.575	450.799	3119.13	2732.12	3607.13	5723.92	4976	3699.78	4168.68	4265.11	1072.37	5877.94	2745.29	85.8945	361.117	2270.57	5381.17	1726.85	220.357	388.936	1013.03	2897.84	3949.4	93.2203	978.165	535.151	1356.84	1307.18	1415.12	1086.84
K01409	4102.9	4170.9	4833.48	631.599	1024.69	1528.51	2340.22	381.856	2650.97	2530.8	1459.68	999.241	1166.23	1202.77	2497.48	1295.71	1808.6	976.024	1111.77	912.832	349.899	4233.1	3098.92	7890.77	4533.73	4034.09	2859.25	2909.13	4260.13	1296.02	5979.97	2557.86	103.798	397.153	2233.63	5363.91	2470.26	191.309	317.282	1121.76	2792.2	4351.24	105.876	630.852	444.894	1765.35	1482.19	1881.78	1078.91
K03657	3380.94	2596.48	3672.33	572.988	1071.68	1383.24	2739.18	590.684	2361.98	2012.06	1845.35	1264.58	1494.74	881.732	2144.82	1171.13	1211.18	741.787	2007.9	895.444	272.567	5591.87	3303.3	4719.2	5627.85	4308.57	2604.59	3144.29	5282.79	1242.95	5371.51	2467.34	137.288	336.006	2128.67	3892.78	2596.93	217.688	298.765	1343.92	2959.14	5196.92	96.9898	557.791	336.157	1165.09	1432.28	1832	842.177
K01703	4831.57	4388.75	4721.71	769.053	1203.44	1440.36	2436.93	386.653	2064.8	2266.11	1475.96	1001.36	985.09	682.967	3363.54	1711.41	1317.42	834.819	1207.72	786.9	268.503	3036.89	2890.9	5021.35	5527.6	4371.46	3117.85	2741.11	3881.12	1414.22	7087.89	2784.45	120.063	374.402	2450.01	5381.76	3096.73	201.293	386.937	1070.15	2748.57	4527.91	94.3425	825.793	338.184	1195.37	1741.52	2069.93	1055.13
K03702	4436.64	4288.12	4860.71	951.344	1232.36	1891.77	2346.35	441.578	2656.19	2391.12	1669.39	1317.42	1691.99	1603.49	3295.88	1780.74	1660.37	898.222	1045.86	850.399	455.629	3472.27	2556.69	4358.73	5457.6	3885.89	3327.44	2969.67	4278.13	1493.26	6157.16	2638.4	102.192	323.363	2200.99	5040.94	2558.87	141.408	270.911	1013.99	2397.43	3838.48	114.71	1311.31	624.534	1411.28	1535.49	1872.96	1246.1
K02933	4866.58	5530.08	5712.7	503.345	741.97	1001.35	2585.44	447.771	2251.44	1996.38	1271.21	1093.63	1260.96	844.196	2898.5	1306.72	903.694	417.892	849.809	622.712	303.569	3291.87	2995.01	2911.54	6293.9	4049.54	3482.29	3280.03	3665.84	1441.36	6502.39	2584.89	138.571	377.158	2456.51	5728.43	2827.18	271.463	396.809	1347.54	2945.72	4245.13	104.01	1011.89	400.342	836.914	1056.42	1261.85	640.838
K03977	4519.38	5356.62	5662.4	468.894	919.623	1291.78	2555.94	406.26	2374.41	2094.59	1222.88	1128.62	1107.56	608.018	2624.05	1178.15	1110.08	635.789	915.118	771.162	349.789	3229.33	2922.29	6428.28	5335.78	4964.36	3464.33	3074.82	3432.07	1379.9	5496.06	2685.54	123.487	401.49	2414.1	5786.29	2965.02	208.142	429.174	1172.66	2908.2	4008	63.3161	675.491	347.523	1053.37	1247.55	1573.73	831.132
K02030	2883.24	2724.54	2780.39	761.019	182.839	1561.67	1903.3	613.781	3304.03	2920.44	1885.56	96.6114	260.685	734.133	2428.12	1090.41	1471.37	881.369	49.7358	580.214	60.0984	8995.36	4435.05	6808.07	6823.77	2595.05	1657.8	3094.09	5411.04	186.036	4943.29	1451.12	140.837	351.422	2730.23	3932.53	3170.83	169.472	311.806	1411.96	2124.08	6400.65	86.2817	261.772	231.76	1329.62	1193.71	1766.06	1268.35
K02036	4192.21	2770.59	3149.77	1104.97	1276.81	2222.39	2360.99	464.621	3466.66	3173.19	1779.94	888.129	1500.45	1455.96	3037.38	1637.91	1469	1256.7	1883.98	851.584	362.251	2699.29	1756.37	7067.91	5856.82	3640.5	2372.28	2581.65	4970.35	790.54	5606.11	2210.24	106.043	364.342	2284.35	4545.5	3061.07	200.164	298.537	1127.26	2213.61	4884.35	63.7769	519.004	436.183	1222.92	1862.37	2107.9	1456.74
K07056	4208.41	3976.39	3973.54	353.064	918.403	1365.05	2141.08	293.88	2062.03	2013.02	1331.79	1810.76	1492.22	567.725	1694.68	1046.13	1455.02	962.857	1010.02	942.469	360.883	2612.67	2883.82	7471.16	4181.43	3950.64	3524.83	3184.21	4791.37	2089.92	5999.56	3424.92	90.7578	280.234	2399.94	5242.88	2145.92	263.761	374.201	1426.63	3744.49	4437.82	92.0828	762.283	412.677	1612.34	1391.7	1352.11	819.24
K06919	5466.44	1831.21	4539.45	1359.11	1788.91	2596.21	2140.76	384.476	1595.5	1725.42	670.514	349.22	593.753	469.007	1181.42	684.616	1816.45	656.335	38.1716	574.755	90.6872	3950.16	3047.56	8901.17	8687.12	1851.32	1786.92	1783.94	6286.54	364.629	6328.01	1042.58	166.922	528.706	3435.97	6182.65	4071.3	435.936	594.614	2255.94	2243.71	5644.36	66.4887	334.637	248.294	520.101	1610.48	1906.15	1800.27
K07568	5148.41	4132.22	4303.55	441.232	1044.04	1180.84	2535.91	362.402	2054.51	1982.92	1359.45	2126.95	1717.52	386.878	2834.63	1702.46	1250.24	864.184	996.558	970.325	414.39	2812.61	2635.87	3389.94	4176.41	4095.37	3982.24	3091.93	3216.22	2083.24	6904.75	3905.94	91.4742	283.012	2593.96	5851.4	2488.97	258.613	393.004	1423.98	3259.47	3604.21	113.403	1018	459.27	1069.99	1825.22	1789.3	911.106
K02564	4394.81	4503.67	4993.77	408.939	562.685	1129.29	2295.86	383.552	1794.1	1603.51	1801.95	2213.91	1049.79	777.775	2118.88	1461.64	1230.97	755.185	767.744	1036.91	248.15	1682.18	2648.72	3622.79	3699.38	5549.81	4103.72	3406.74	3953.22	2594.54	6851.9	3823.18	81.5297	361.59	2576.72	6622.73	2751.98	240.784	350.708	1093.2	3870.77	4557.18	103.04	650.038	283.088	851.734	1893.05	1442.41	719.559
K06889	4750.82	2845.86	2409.81	409.197	1435.75	1187.84	3212.62	464.858	988.635	934.334	1704.13	2139.21	1832.52	687.563	2057.03	1548.13	622.346	893.972	2356.16	973.381	255.997	3519.83	2966.11	4033.87	4797.28	6486.74	4264.55	2412.65	3682.61	1588.78	6361.7	3474.86	142.581	260.246	2728.04	4683.11	2741.78	323.754	477.588	1658.84	3683.34	3476.13	91.7182	465.677	242.062	739.144	2116.51	1905.66	791.013
K03495	4250.13	4537.63	4914.75	559.005	1165.3	1495.43	2389.42	339.087	2359.48	2121.34	1204.86	1309.88	1077.34	518.543	2661.24	1393.11	1466.08	794.958	898.901	823.556	229.88	3576.53	3022.62	6551.38	5962.7	3658.96	3239.14	3543.2	4991.31	1191.05	6051.93	2682.55	122.338	367.223	2323.01	4992.94	2932.97	202.295	325.485	1164.98	2647.17	4264.26	87.1192	638.2	283.438	1028.36	1486.38	1771.88	952.515
K01956	4430.62	5054.94	5553.27	1534.83	909.48	1357.97	2483.58	467.828	2139.84	2072.04	1321.4	920.492	989.066	682.534	2318.06	1274.03	1282.79	675.309	1023.65	715.922	138.576	3489.38	2872.74	5405.08	5376.28	4855.62	3267.1	3427.47	3967.64	1113.19	5682.14	2409.09	116.33	382.252	2253.38	5688.36	3263.43	154.354	375.278	1084.29	2774.89	4260.08	87.7992	405.561	244.074	1035.22	1234.04	1375.66	708.712
K03427	5976.3	4209.1	4759.78	568.336	370.09	1022.82	4596.16	754.087	1112.22	1062.12	1136.6	628.933	876.228	1100.46	3925.9	1807.11	1002.98	373.703	190.974	614.241	378.021	1375.56	2584.1	2307.13	6879.35	3222.88	4333.27	3479.63	4887.82	2847.77	7142.17	4710.07	146.685	403.669	3215.54	5103.54	2262.97	236.477	299.266	1196.01	2097.09	4355.26	56.2712	663.473	211.227	379.93	1418.52	1309.43	856.016
K00052	4697.13	5221.04	5574.45	674.429	1040.54	1449.06	2552.41	392.855	2217.56	2048.17	1434.89	1019.55	1072.01	674.339	2177.76	1188.91	1612.5	693.131	1094.16	784.265	228.523	3052.06	2795.24	5669.26	4960.74	4765.54	3381.8	3271.57	3556.65	1420.42	5790.06	2629.34	106.592	384.198	2342.47	5886.51	2830.8	178.986	410.46	1153.16	2827.58	4222.06	57.3698	425.439	236.276	1119.51	1466.98	1664.52	863.812
K01945	4503.29	4371.85	4538.94	771.659	1350.43	1345.08	2627.81	412.747	2795.47	2473.77	1826.45	1395.2	1196.58	931.069	2615.46	1372.49	1395.75	776.405	993.563	798.588	310.685	3179.88	2864.49	4951.43	5322.18	4280.85	3134.43	3299.26	4167.87	1104.23	5840.7	2547.76	121.896	352.77	2200.14	5166.6	2839.52	219.354	325.323	1163.9	2695.86	4133.03	70.968	539.121	245.668	1122.6	1748.72	1792.17	874.137
K01591	4444.81	3925.05	4727.94	823.223	922.661	1573.91	2645.37	422.817	2413.23	1940.43	1768.27	1194.29	1583.12	1262.42	2122.77	1201.03	1514.48	637.533	969.024	824.605	408.449	2844.41	2734.64	5034.25	4807.65	4816.33	3315.93	3292.97	4022.37	1548.25	5836.35	2870.02	102.735	406.978	2270.5	5207.97	2644.05	199.295	310.706	1169.38	2562.45	4640.58	129.26	879.272	466.347	1219.76	1375.8	1419.81	782.857
K02926	4388.58	3978.39	4283.67	1002.84	1122.99	1635.33	2547.66	448.5	2602.7	2543.51	1444.94	1005.61	1245.11	985.801	2308.4	1091.36	1483.77	854.661	838.581	736.149	415.547	3590.5	2776.6	4765.33	5678.2	3572.62	2956.45	3159.16	4633.29	784.989	6417.39	2475.1	133.679	368.618	2469.38	4721.23	2348.06	229.52	338.734	1259.7	2821.75	4410.02	66.439	992.164	469.579	1382.16	1231.97	1667.55	1220.04
K02899	5140.36	4727.22	5495.4	1179.79	1472.19	2179.12	1374.96	266.306	2274.34	2337.99	1825.39	867.43	1543.42	1927.33	3535.85	1734.05	1546.17	874.426	1130.19	798.671	552.739	2737.73	2374.02	2996.9	5143.16	3785.09	3462.43	3066.82	3497.07	742.379	6241.35	3251.67	139.626	403.103	2230.19	5167.95	1518.96	170.389	379.502	1072.25	2695.91	3665.37	91.7735	1840.61	671.239	1428.83	1483.13	1849.3	1555.61
K00133	4507.45	5241.98	5510.88	666.431	1376.65	1267.22	2407.15	392.335	1985.14	1893.68	1482.79	1185.41	1281.42	718.02	2849.45	1477.79	1491.59	632.078	1105.22	832.072	410.669	2890.15	2488.64	3380.92	5294.65	4671.68	3500.12	3520.65	3757.5	1369.71	6175.83	2701.59	117.555	359.122	2341.72	5317.42	2558.11	149.698	309.445	1028.77	2947.35	3683.45	76.3847	715.569	291.166	1032.96	1491.68	1788.95	854.08
K02876	4361.86	6092.36	5509.74	721.551	654.255	1428.1	2064.08	448.218	2216.94	2330.26	1238.66	766.929	1260.65	875.156	2713.58	1172.71	1236.34	603.422	951.928	642.891	338.802	2512.58	2629.66	3668.38	6124.42	4214.86	3258.58	3697.99	4412.18	1039.41	5811.16	2524.58	98.2556	434.338	2282.66	5861.88	2765.5	159.011	383.326	1183.58	2800	3841.48	86.6178	713.124	426.148	1317.01	958.603	1266.2	948.368
K03438	4451.56	3706.97	3939.54	435.828	882.939	1403.32	2407.75	500.654	2673.83	2399.92	1596.23	1027.56	1210.06	666.454	2465.28	1336.29	1589.97	808.095	690.738	920.876	255.873	3023.92	2631.08	7828.63	5448.67	3172.45	2871.18	3188.6	5802.38	1190.33	6134.87	2902.38	99.5826	341.78	2128.31	4300.14	2541.9	184.269	284.637	1226.29	2434.96	4293.34	98.343	582.006	383.344	1417.16	1611.39	2053.29	1015.4
K02835	4243.01	5044.9	5306.18	726.32	951.963	1425.16	1978.48	282.56	1681.95	1713.27	1526.45	1403.41	1674.62	965.872	3018.12	1664.9	1777.16	972.225	959.133	909.24	420.805	2692.2	2560.37	4703.17	4533.11	5265.01	3538.33	3546.33	3404.49	1523.71	5260.66	2849.8	86.3514	319.695	2092.3	4984.81	2374.95	168.125	367.494	1099.8	2781.18	3641.95	92.6853	1217.33	552.444	1290.51	1403.18	1484.39	887.024
K00847	4482.67	3538.64	3467.1	329.871	1260.13	1098.41	2325.55	434.231	2941.47	2420.65	1295.27	1066.86	972.221	800.286	1346.17	901.093	1334.06	892.838	716.511	881.917	107.321	2467.93	2391.82	5049.39	4964.45	4030.84	2751.3	2982.84	6419.01	1512.73	5023.06	3088.8	63.5116	314.376	2376.28	5362.79	2381.01	289.034	389.423	1641.53	3820.29	5078.7	62.0426	141.011	162.603	788.946	1619.47	1544.29	1017.4
K02836	4228.06	3899.52	4531.49	791.573	1070.16	1682.89	2257.34	340.486	2054.01	1984.98	1399.17	1133.29	1405.17	566.362	3037.99	1610.72	1484.36	694.788	947.116	799.631	346.725	3035.47	2498.52	3828.15	4883.31	4504.64	3209.69	3489.1	4096.7	1334.31	5965.52	2717.79	96.9221	344.476	2301.91	5018.06	2579.32	161.5	328.078	1133.2	2869.02	4156.03	97.1926	1246.52	580.089	1441.27	1586.94	1655.11	978.866
K01647	4239.62	3259.86	5535.18	1558.89	789.697	1918.18	2866.53	485.978	2113.13	2094.17	1333.69	565.448	828.739	1360.95	4017.09	1635.59	1309.83	185.364	941.541	626.556	184.527	1139.59	2537.81	6384	8240.09	3038.83	2378.9	2999.67	5505.78	717.858	6017.8	2189.09	96.9908	376.036	2257.79	4670.22	2622.27	231.839	306.677	1121.59	2286.27	4905.04	57.6473	637.853	192.598	829.905	1259.03	1433.16	1166.51
K03498	4352.99	2675.1	3512.63	728.447	886.404	1492.33	2701.63	446.642	3149.43	2922.77	1355.56	538.394	479.27	720.65	2259.07	1106.04	1729.9	940.624	96.5711	719.001	273.324	3966.77	3080.7	6582.72	6167.1	2225.02	2203.25	2353.62	6090.83	879.726	6368.5	2586.3	133.248	363.16	2355.23	4842.34	2008.94	279.333	397.518	1655.95	2876.4	4995.57	50.5708	340.92	237.146	1014.64	1433.46	1979.07	1361.74
K01886	5089.81	4956.07	5683.27	477.816	804.839	1464.1	2607.4	392.545	1504.15	1645.31	1128.48	1210.14	1472.21	491.24	2831	1597.74	1388.31	886.888	1086.94	903.979	350.654	2249.68	2819.93	4814.1	5266.68	4551.41	3582.52	2835.03	3641.46	1532.9	5844.31	2425.11	108.3	428.68	2464.56	5945.06	3061.6	159.726	344.828	1083.98	2541.29	3619.44	84.7112	762.653	370.344	770.153	1569.56	1658.72	987.573
K02871	4659.55	5591.11	5481.91	451.907	972.504	988.106	2271.11	423.261	2308.42	2327.83	1155.57	911.941	885.871	1139.22	2770.1	1398.42	1081.06	466.165	597.242	693.881	253.989	3719.19	2939.06	2737.49	6061.66	4557.02	3477.82	3288.84	3691.9	1226.66	5537.88	2417.85	137.374	443.033	2373.73	5368.77	2719.97	227.985	385.423	1137.19	2834.05	4437.16	69.6412	475.718	300.725	796.856	1152.62	1337.94	548.157
K00939	4309.38	4672.16	5213.46	429.181	772.158	1248.09	2346.51	368.733	2322.32	2032.64	996.228	1052.51	1202.42	735.673	2451.45	1235.81	1158.51	695.421	1007.1	733.63	267.307	3707.91	2924.94	5232.09	5310.83	4400.66	3085.38	3117.37	4200.69	1144.88	5358.17	2554.06	115.882	461.74	2518.03	5178.23	2574.99	219.424	385.475	1200.75	2621.9	4016.79	83.8334	484.691	326.423	1285.67	1172.3	1594.17	870.001
K01937	4258.71	4324.9	4594.21	918.443	984.079	1587.07	2477.59	397.16	2282.89	2045.04	1799.74	1021.79	1315.32	809.624	2335.36	1353.31	1531.37	635.128	1052.67	737.653	317.99	3701.12	2609.47	4126.98	5198.94	4371.58	3296.23	3129.59	4108.23	1648.17	6101.01	2546.62	101.103	318.589	2357.56	5183.38	2375.87	154.758	287.09	963.717	2433.53	3709.87	97.1273	845.799	409.637	1068.21	1426.43	1579.48	972.905
K01803	4539.96	4306.97	4602.65	502.595	1097.18	1383.77	2635.14	376.207	2266.71	1998.74	1329.53	1030	1247.95	901.979	3065.73	1549.75	1302.87	610.938	1011.65	764.7	409.045	3350.02	2511.58	4335	4599.84	4213.84	2971.03	2919.46	3480.26	1560.45	6427.68	2813.43	114.166	370.14	2430.37	4955.21	2675.94	156.776	335.473	1169.63	2561.62	3977.73	104.085	628.12	354.255	1278.54	1316.44	1671.22	725.885
K01785	4357.1	3021.51	3412.22	251.267	1379.25	741.946	2857.43	389.031	1883.12	1689.33	1109.62	1341.14	1001.22	404.133	3087.28	1468.48	817.073	430.185	912.742	842.662	166.276	3177.7	2978.53	4007.52	3719.66	4386.22	3772.07	2135.36	3470.63	2001.78	5826.41	3798.42	97.6858	227.48	2310.94	4649.2	1878	349.87	609.732	1630.9	3936.73	4173.12	70.0041	400.776	198.555	821.246	1648.08	1474.09	712.192
K01892	4023.38	4310.74	4502.92	743.859	984.618	1443.33	2311.29	383.455	2485.86	2197.47	1236.45	1062.93	1242.43	579.643	2407.82	1324.84	1344.52	819.069	921.611	786.101	317.954	3253.4	2375.5	5909.85	4251.55	4025.63	2929.07	2864.38	3908.53	1282.54	5390.61	2542.29	122.858	343.276	2384.67	5510.71	2466.4	216.14	345.132	1179.28	2864.2	3743.21	81.9939	715.302	401.917	1294.2	1310.8	1647.57	1093.18
K01881	4028.95	3875.2	4520.48	794.156	1212.91	1503.28	2285.51	355.682	2358.45	2143.51	1321.57	1140.47	1383.85	1007.32	2878.28	1439.53	1414.22	671.072	1087.09	758.534	352.267	3360.69	2513.08	4218.53	5285.67	4571.69	3149.21	3112.1	4309.63	1440.68	5722.09	2658.01	98.9765	362.503	2286.51	4771.57	2204.84	131.521	346.739	1084.58	2480.77	3717.45	92.1374	808.726	358.659	1181.97	1325.38	1716.93	990.36
K12373	6928.43	3834.67	2169.71	30.8605	80.3072	1103.91	1981.02	199.395	1563.3	1057.14	1065.41	3907.38	2786.3	224.83	1692.19	1174.2	488.77	486.614	3716.43	885.933	325.22	730.644	2998.83	638.874	386.641	6498.66	4771.51	1291.61	790.044	3159.68	6226.76	4269.96	0	14.0959	2839.53	5881.56	1982.68	430.129	589.079	1578.8	4808.65	3263.32	27.3849	106.806	67.8669	207.755	3008.89	2157.6	549.002
K01738	3997.61	3768.37	4285.14	929.591	1063.53	1927.87	1450.77	257.893	2239.67	2240.66	1474	870.616	947.943	1052.06	2283.61	1215.98	1897.97	1096.63	1572.14	875.29	271.925	4229.62	3270.27	4566.95	5115.24	3940.91	2983.33	3544.68	5311.9	762.595	4739.51	2505.82	121.597	343.773	2396.62	4961.2	1879.88	216.397	370.866	1131.42	2537.44	3637.2	65.0539	585.557	313.872	1071.11	1692.88	1807.83	1387.44
K02016	4196.76	2524.71	2309.89	289.194	3821.19	767.67	2977.27	374.131	1572.87	1433.06	1184.16	2230.73	1203.09	305.806	1422.3	1125.83	790.149	723.996	146.962	945.165	257.429	14612.8	7384.59	2900.54	4716.45	2671.29	2969.79	1611.61	2874.89	1406.13	6265.82	3172.25	168.609	240.281	2742.71	4366.77	2027.22	185.106	292.549	1296.49	2939.77	3027.53	98.2338	487.31	197.941	382.398	1670.76	1372.3	666.065
K00566	4484.83	3938.74	4016.07	281.834	631.458	1158.82	2285.36	301.681	2080.78	1755.77	1086.05	1461.9	1139.33	519.981	2028.7	1194.82	1212.85	978.267	1132.83	788.293	193.987	2935.86	3075.37	6408.55	3907.28	3883.12	3336.46	2752.74	4091.92	1388.39	5134.16	2984.23	87.4133	231.109	2107.14	5277.34	1917.02	339.298	466.601	1603.62	3513.6	3612.83	66.8162	356.336	221.932	796.371	1744.27	1565.31	759.984
K01893	4822.79	3891.53	3898.3	728.137	986.203	1710.61	2651.38	414.232	2246.96	2172.55	1255.34	1238.54	1443.33	523.036	1614.39	1069.78	1330.14	889.71	1077.47	812.762	525.469	1719.05	1885.37	4885.8	5203.21	3451.14	2984.5	2704.22	4470.45	1389.24	6067.45	2741.49	128.84	418.244	2678.25	5110.12	2953.59	238.591	333.824	1246.29	2632.17	4246.47	93.8229	836.587	528.649	930.712	1388.75	1477.77	1188.09
K01265	4245.77	4591	5030.79	471.718	851.839	919.848	2844.46	461.76	1886.4	1822.87	1186.31	1335.17	1353.31	801.003	2204.36	1110.29	1065.54	448.741	1164.21	834.147	300.392	3350.62	2661.07	1290.42	3744.36	4603.5	3659.17	3174.95	3988.63	2288.94	6403.46	3304.06	90.6943	272.433	2205.26	5535.81	2117.45	196.183	323.954	1043.35	3126.89	3201.69	87.7728	729.515	259.628	884.641	1390.85	1681.59	624.832
K15633	4479.78	4919.56	5714.46	614.399	1176.52	1205.85	2616.68	369.538	1430.16	1690.18	1069.07	1259.36	1100.42	872.505	2678.81	1397.78	1226.87	602.262	889.657	772.028	324.639	2145.02	2891.79	4126.13	4558.97	4654.63	3711.29	2782.46	3110.36	1787.39	6168.5	2686.79	104.597	392.326	2154.94	5865.38	2362.27	222.292	360.903	1062.07	2804.92	3433.34	73.9858	557.422	284.02	960.449	1417.1	1669.36	785.679
K03106	3921.33	3425.93	3950.88	673.644	926.695	1436.26	2134.36	377.613	2209.83	2026.49	2874.31	1263.83	1395.83	918.294	2234.25	1295.13	1566.83	788.622	768.771	743.768	410.525	2943.08	2602.64	5819.64	4350.29	3789.56	2945.42	3033.8	3572.65	1507.7	5571.24	2555.14	80.0179	306.783	2186.06	4456	2327.49	171.265	295.564	1105.19	2722.82	3814.14	98.5656	937.828	548.92	1425.93	1300.11	1597.93	947.689
K03545	3116	2283.25	2906.82	389.568	639.188	1398.91	2922.85	547.28	2984.65	2848.74	1005.67	792.982	1037.49	677.469	1490.32	731.772	1292.41	1108.1	766.26	738.682	167.743	3384.45	2582.32	8979.25	5932.99	2709.67	1984.3	2417.42	6474.55	918.141	5360.99	2177.69	94.5904	269.524	2105.15	3927.98	2123.93	315.294	454.577	1995.13	2804.19	4606.02	73.2073	288.241	255.861	858.169	1213.38	1520.74	1232.48
K00290	5251.77	7159.88	6268.34	521.624	193.023	1454.65	2315.21	388.036	1436.38	1654.23	1181.11	1011.49	1162.4	408.923	2171.15	986.187	1639.73	458.868	910.711	696.356	219.898	176.212	2098.92	3466.44	5162.22	5503.34	3677.34	3313.51	4271.8	1467.11	6107.54	2306.49	64.226	415.898	2019.3	5534.43	2782.91	160.483	359.021	1041.23	2724.64	3565.17	72.4733	591.899	292.022	874.169	1317.77	1407.96	726.95
K03324	4078.75	4278.07	4947.01	346.641	697.132	1139.57	2430.64	439.79	2373.2	2462.69	1013.72	505.844	410.737	572.251	1851.83	894.694	1305.37	822.072	44.9151	643.18	98.3798	1137.57	2389.46	7187.1	6138.45	3623.54	2814.2	3045.9	4609.93	1177.03	5713.15	2447.89	87.7776	359.239	2100.52	5494.02	2336.49	248.126	442.899	1417.69	2805.91	4110.26	41.2374	154.985	150.757	1068.27	1192.79	1401.03	983.192
K02013	3713.57	2354.36	2163.69	360.776	3612.22	1082.22	2904.72	350.473	2015.44	1550.28	1590.01	2144.85	2038.08	398.865	1633.49	1181.83	799.234	946.697	958.731	1008.42	358.769	12864.1	6204.3	2304.52	4304.86	3569.91	2935.32	1939.44	2963.87	1325.56	6381.44	2586.87	154.238	226.481	2828.61	4371.97	1688.98	102.321	164.197	909.703	2554.1	3064.2	60.2603	545.958	258.076	416.106	1509.41	1397.12	616.529
K00849	3438.72	3935.08	4404.07	284.631	562.756	1259.05	2311.18	412.111	2140.18	2080.62	1135.29	881.051	989.244	403.574	3368.81	1532.78	1360.41	804.241	1042.23	667.764	199.365	1661.89	1915.83	7452.82	4086.56	4133.87	2884.65	3026.7	3838.52	1752.81	5764.29	2711.86	77.07	318.598	1931.37	4878.92	2000.77	194.425	410.249	1381.82	2722.68	3564.99	71.9797	472.698	312.183	1398.78	1175.61	1566.69	948.588
K17828	3955.77	3878.19	4392.14	757.97	375.825	1533.41	2045.57	316.783	2442.99	2235	2679.99	822.06	1092.45	1448.3	2022.4	1196.89	1568.57	825.231	203.52	770.381	261.11	1698.32	2493.54	7625.54	5091.86	3529.43	2900.73	2948.65	3962.72	1471.81	5657.35	2344.91	66.6353	325.03	2065.39	5080.81	2636.34	153.131	320.274	1050.91	2402.58	4066.3	97.113	673.646	416.36	1240.41	1076.34	1383.69	996.728
K03100	4084.67	3474.09	3653.29	234.02	593.182	833.885	2197.3	375.716	2495.96	2123.94	1928.51	1348.13	907.219	668.757	1712.5	977.84	1202.64	439.37	879.345	682.969	97.4612	3881.04	2916.34	2725.47	4458.6	4079.61	3226.88	3131.72	4938.35	1403.32	5916.9	2846.68	73.6161	227.186	2382.91	4479.58	1997.04	342.007	480.585	1622.99	3682.88	4053.86	57.2369	221.701	118.94	877.341	1462.61	1684.35	786.263
K00600	3988.67	4058.01	5029.79	947.663	1129.97	1459.3	2174.01	325.48	1925.48	1796.44	1655.19	1302.17	1274.21	762.717	3332.35	1627.03	1639.19	842.778	359.224	821.585	338.954	2953.45	2485.12	4865.08	4657.75	3802.16	3593.06	3050.72	3916.06	1647.1	5433.39	2558.61	94.0148	303.794	2103.49	4787.03	2178.59	141.977	342.818	1083.05	2313.51	2935.42	57.8964	1365.26	357.52	1046.86	1249.43	1525.43	991.149
K01091	2935.22	1943.27	2465.57	315.229	771.732	1612.71	2481.74	473.847	3125.78	2866.12	1314.29	1171.57	1868.61	599.412	1854.38	886.951	1030.66	600.791	3107.34	947.356	275.533	4282.02	2640.78	7457.8	5010.36	3814.22	1848.59	2428.01	5939.67	1244.17	5496.74	2568.07	105.46	240.103	1748.96	3948.67	1669.19	256.06	304.87	1466.42	2261.35	3898.78	59.3585	199.958	184.314	1237.71	1748.7	2315.26	870.891
K03147	4202.34	4234.52	5269.65	596.16	1184.38	1573.24	2187.61	316.743	1700.33	1624.96	1474.68	1019.04	810.13	1171.9	2279.6	1225.55	1813.24	802.432	717.483	692.677	113.288	2405.52	2611.89	5165.41	4746.56	5032.5	2706.13	3135.65	3687.3	1098.77	4602.41	2017.78	104.872	404.797	2137.47	5249.77	2381.74	137.811	282.177	999.89	2474.1	4045.87	75.1376	1205.49	297.41	1236.13	1154.37	1262.79	733.717
K02988	4456.82	4240.89	4166.67	699.689	1102.1	1412.56	1984.82	307.371	2137.14	1924.03	979.437	1152.42	1446.14	906.319	1957.3	1018.89	1282.16	606.14	1170.41	696.273	350.309	2766.34	2407.74	4502.92	5795.22	4257.58	3156.29	3318.74	4152.17	1204.37	6157.93	2801.03	112.782	339.311	1993.43	4841.56	1912.05	206.033	326.187	1124.33	2468.01	3918.56	99.9147	974.779	451.687	1044.43	1085.52	1271.34	783.076
K01187	5203.62	2678.89	2596.03	480.406	1458.94	721.927	2270.18	449.052	1057.95	966.586	1351.02	1496.9	967.364	460.919	1708.38	1036.75	902.896	829.902	813.499	791.269	106.421	1144.87	3015	3632	3964.87	4414.83	3217.8	2338.96	3926.2	1437.45	5048.34	3397.85	101.38	231.937	2343.95	4472.12	2156.66	284.491	443.074	1305.93	3467.37	4030.04	79.5744	199.145	116.154	490.357	1942.26	1574.47	574.03
K00609	4020.27	4142.7	4663.25	578.099	1109.75	1168.61	2053.93	341.303	2010.75	1848.08	1337.41	1191.15	1335.63	613.503	1906.93	1120.43	1455.14	721.813	970.549	860.544	374.244	3337.93	2527.44	4673.62	4349.48	4573.91	3240.49	3079.91	3349.72	1543.06	5248.68	2358.02	90.4856	321.321	2114.14	5076.47	2406.11	128.43	297.876	1026.34	2698.57	3883.4	137.164	814.342	511.865	1271.91	1104.99	1380.18	731.04
K01714	3730.97	3585.09	4472.5	459.722	983.355	1137.82	3094.93	537.245	2917.99	2573.84	1153.12	884.084	873.188	594.783	1795.5	1048.04	1407.76	840.575	806.541	751.79	206.981	2044.02	2261.05	4478.35	4542.56	3782.31	2526.84	3209.76	5790.62	1200.69	4891.52	2325.13	99.4321	349.378	1974.68	4537.8	2202.64	197.334	316.698	1294.77	2995.57	3792.04	91.8075	362.282	195.076	993.814	1322.76	1383.22	847.221
K01887	3782.28	3621.42	4447.99	622.822	579.561	1260.45	2201.42	355.822	2251.99	1860.74	1335.62	1276.35	1080.6	845.967	2552.65	1162.38	1506.18	555.586	903.874	646.213	230.382	3309.12	2706.8	5221.79	4134.44	4514.58	3009.74	3238.39	3531.23	1390.62	5311.25	2469.47	89.1188	312.39	2260.73	4915.96	2261.63	219.231	391.731	1209.86	2638.82	3692.88	62.1641	607.907	315.739	1065.6	1114.24	1306.15	730.658
K18682	4423.39	4826.78	5176.03	469.477	301.696	1387.69	1561.98	245.595	2072.03	1978.57	1087.78	1184.04	1181.05	363.471	1964.29	1127.26	1392.28	946.278	212.919	707.928	375.306	2068.94	2431.13	6211.39	4751.15	4152.17	3398.1	2876.48	3448.26	1359.92	5504.81	2599.12	92.7049	351.255	2133.6	5121.93	2002.74	143.675	409.212	1069.42	2488.73	3284.21	83.4264	1078.01	574.428	1541.36	1222.34	1397.6	1102.56
K01681	4233	3373.88	4063.32	826.207	1599.92	1677.18	2608.39	434.129	1736.65	1819.77	1718.88	665.388	986.257	901.292	3387.25	1610.91	1381.64	553.298	1066.7	736.089	315.241	1892.56	2028.41	6891.21	5624.89	3280.73	2396.03	2517.23	4589.94	885.442	5115.54	2093.22	95.8634	297.728	2098.09	4185.06	2716.4	163.308	272.573	1014.79	2320.04	4304.41	68.6868	527.486	253.918	1081.11	1438.23	1749.73	932.479
K03215	3678.6	2860.13	3555.82	456.627	765.043	1460.65	2530.93	434.457	2619.61	2485.24	1341.59	896.019	1045.53	406.426	2320.1	1132.3	1277.58	862.263	1015.08	825.116	218.767	2811.14	2263.6	7788.57	4941.73	2879.69	2455.57	2623.96	5737.13	1493.48	6086.03	2522.96	74.7437	324.397	2164.33	4456.49	2114.67	236.074	348.096	1443.23	2344.23	3337.72	61.6488	444.938	246.027	932.405	1518.68	1807.71	925.519
K00558	4612.2	2788.4	5081.29	1252.58	691.829	1707.23	2429.69	467.303	1996.21	2222.63	1356.84	604.646	479.741	395.136	6893.48	3101.16	2331.74	900.046	377.297	535.057	157.596	985.914	1878.22	5460.79	6056.24	2201.28	2467.98	2250.65	5306.81	384.108	7627.23	2445.45	98.9671	323.726	2313.88	5249.22	2495.81	79.0884	243.349	623.779	1645.83	3433.74	32.9292	260.893	165.493	1469.35	1126.44	1847.76	1365.48
K03111	3393.98	2950.21	2905.22	806.337	1665.87	1160.96	2398.12	449.798	3672.6	2864.94	2690.69	1065.37	1450.37	2352	1340.9	797.207	1153.11	712.72	708.183	635.179	477.407	6591.73	2083.25	4013.25	4329.67	2883.85	2314.2	2824.32	4722.05	996.777	5320.47	2285.72	133.88	235.287	2550.96	4350.39	1671.6	172.819	222.077	1204.83	2239.97	4853.52	112.402	789.923	445.845	755.201	1400.14	1402.55	699.457
K01649	3656.4	3363.57	4293.56	678.498	1007.41	1552.76	2259.7	373.606	2055.27	1892.24	1183.43	979.83	1301.01	609.757	2747.99	1329.75	1264.72	784.121	1861.03	701.024	269.388	2592.98	2468.99	5020.25	4528.13	4762.37	2790.2	2539.96	3740.87	1264.08	5620.25	2276.62	107.552	326.407	2239.12	4771.85	2461.43	192.301	310.693	1049.35	2553.51	3943.23	71.2928	464.019	250.712	1025.86	1441.13	1529.38	789.067
K02528	3681.66	4191.39	4818.92	395.108	1028.23	1242.19	1984.17	279.919	2334.15	2016.62	1319.45	793.297	938.957	637.12	1971.92	1091.59	1186.39	641.134	949.677	652.881	211.023	3594.51	2747.1	5816.46	4705.62	3830.31	2882.01	3471.73	4188.95	1084.32	4896.18	2155.32	109.629	370.825	2179.76	4947.49	2400.29	198.304	299.754	1016.74	2722.24	4061.91	48.508	302.019	146.558	859.58	1235.07	1310.81	766.251
K01704	4165.72	3812.03	3526.06	580.172	1003.62	1280.14	2399.62	397.542	1865.17	1999.14	1434.76	887.184	1126.76	724.668	3432.92	1681.99	1250.23	710.241	1092.09	626.661	207.828	3141.25	2623.47	3547	5080.89	3350.05	2664.92	2745.32	3459.03	1199.85	6197.08	2937.92	139.311	240.668	2011.39	4296.03	2430.64	187.406	284.433	988.082	2570.96	4231.74	64.4683	742.857	324.785	1125.11	1650.13	1565.33	949.008
K02428	3857.74	2929.07	2700.44	425.958	822.035	1292.72	2154.82	350.678	2042.97	1799.82	1135.91	1473.96	1574.83	494.271	1634.04	936.215	1059.56	829.321	1880.4	795.752	300.99	2666.51	2608.61	6551.68	3377.13	3868	2838.29	2769.11	3679.64	1756.61	5763.03	3343.57	83.2722	252.472	2583.92	4981.49	2159.31	288.383	360.714	1150.36	3037.94	4033.82	54.7489	419.29	252.725	1063.16	1451.7	1420.21	721.299
K03150	4371.81	4886.27	5315.22	492.796	1227.4	1285.39	2648.19	388.227	1506.39	1515.72	1556.2	1216.65	1364.07	1319.97	3528.9	1842.4	1551.67	370.308	1064.49	827.998	239.529	3469.58	3266.51	1022.89	4521.05	4615.29	3715.49	2405.77	4542.58	1388.68	6236.53	2404.04	64.9796	230.624	2268.81	6130	2425.96	190.432	283.386	902.187	2580.83	2608.72	61.4062	384.126	137.157	346.614	1519.03	1414.6	574.101
K01889	3982.13	3854.45	4787.03	546.004	846.2	1333.99	1967.3	328.38	2094.95	1977.85	1388.32	1001.7	1425.41	1142.24	2722.15	1318.28	1391.64	614.335	1013.9	763.424	247.178	3155.32	2534.9	3921.33	4283.39	4548.29	3187.55	2980.77	3283.21	1321.9	5710.17	2557.81	77.9578	371.166	2223.57	4848.89	2209.93	158.894	299.347	1036.57	2322.32	3453.95	72.168	852.414	389.263	1087.35	1227.1	1519.95	851.154
K07473	6152.06	4627.09	3727.29	1547.61	1304.68	2614.3	2136.59	454.702	1379.16	2391.63	1698.1	102.421	282.156	565.058	1927.99	824.398	2280.17	316.39	81.2146	313.651	307.136	1639.44	1421.58	1970.55	3207.69	1077.02	3484.58	2286.12	4872.3	364.918	10987.9	799.755	57.7948	194.404	2730.2	6372.59	3516.27	87.8372	190.585	744.006	2089.53	6172.59	33.9703	232.854	125.026	278.635	2172.11	2108.54	1303.15
K02961	4748.88	5492.4	5596.53	555.643	991.139	753.279	1234.93	271.234	1765.04	1694.24	809.957	934.972	899.76	1124.41	1874.67	1030.37	857.381	314.184	444.678	560.741	417.163	2916.7	2538.88	2108.18	5959.02	4703.01	3707.71	3115.09	3639.94	684.013	6231.26	2547.97	65.5418	444.679	2397.49	5627.81	1701.96	131.648	440.638	977.281	2400.81	3637.2	119.016	1086.7	373.45	705.293	1144.11	1189.96	758.818
K02887	5105.28	5361.13	6028.27	647.813	429.022	1252.03	1352.77	260.551	1475.09	1568.89	1299.14	589.826	979.806	1320.46	2843.51	1296.05	1501.7	362.731	488.8	549.706	205.211	1610.96	2081.11	2772.5	5627.43	4625.52	3139.17	3501.75	3544.58	438.305	5616.19	2408.17	97.6793	372.732	2064.96	5263.16	2293.15	102.763	391.184	974.653	2771.11	3573.05	118.782	1157.34	358.009	1016.88	1102.27	953.782	909.204
K01262	3676.29	3458.89	3952.14	270.035	739.906	912.8	2565.16	448.925	2150.45	1796.16	1445.49	1338.96	979.331	446.514	1460.77	823.516	1119.24	745.258	912.295	852.572	200.633	1824.32	2036.83	4359.66	3473.7	4299.1	2995.1	3014.08	4739.25	1521.21	5052.37	2884.24	55.9282	273.67	2086.84	4528.21	1716.89	271.514	437.231	1488.85	3352.76	3759.88	58.2203	417.244	244.935	829.413	1392.89	1342.89	702.823
K01462	2844.57	2315.99	2712.91	432.834	846.019	1158.01	2273.62	480.798	3618.46	2970.35	1640.26	1014.02	712.83	922.467	1536.55	881.389	1069.52	499.981	685.835	588.385	152.696	4202.68	2127.14	6274.44	4846.77	2645.47	1862.42	3095.73	5546.64	556.346	5038.27	2582.68	57.4831	244.593	2337.72	3757.75	2510.36	221.245	286.988	1581.47	2660.49	5261.16	73.8878	373.942	192.452	889.753	1216.83	1461.39	866.281
K03624	4015.57	4360.63	4215.15	438.513	683.924	845.885	1915.14	353.319	1997.98	1985.68	1395.48	813.661	1065.39	468.572	1790.75	889.188	1459.31	515.38	174.493	649.116	411.95	2597.88	2522.84	3108.05	5462.26	3413.38	3111.9	3440.09	4679.38	1324.95	6260.57	3018.66	61.9654	339.786	2376.63	5352.52	1898.24	165.599	389.885	1290.06	2664.82	3848.92	42.7581	719.207	346.252	931.882	1205.01	1462.77	784.596
K00873	3244.17	2586.31	3291.95	534.971	1201.98	1163.16	2588.4	374.192	2060.41	1775.4	1002.31	1318.89	1248.16	436.448	1818.4	1031.26	1206.26	721.109	1180.76	854.42	258.031	3812.87	2648.31	7201.05	4134.5	3186.4	2353.47	2495.7	4011.05	1657.32	5281.36	2409.11	124.58	330.128	2409.96	4401.68	2342.01	227.482	381.332	1383.76	2655.99	3751.84	94.7874	721.827	381.368	1082.84	1296.72	1374.76	796.32
K01338	4075.95	3817.74	3886.34	533.588	1454.23	1159.78	2829.92	425.276	1841.47	1999.55	1447.89	894.458	988.265	737.923	1854.32	1060.97	1594.88	560.238	162.23	775.337	260.493	2283.13	2307.07	4165.35	6424.57	2624.53	2849.19	2760.24	5160.16	1497.83	6389.67	2771.53	108.78	324.592	1848.4	4523.29	2045.11	227.883	287.973	1321.06	2387.06	3795.14	85.9992	647.988	277.972	791.769	1223.24	1486.45	946.459
K07171	4576.96	2948.29	4632.86	1046.99	862.837	1483.89	1990.52	470.464	1693.15	2265.55	911.187	166.435	559.29	834.28	5617.69	2011.11	1430.69	524.922	123.113	556.542	174.428	1253.66	1662.2	7102.15	6753.28	1408.25	1933.52	1856.58	4681.49	195.707	8076.34	1741.16	102.676	301.402	2442.54	4043.92	2583.19	236.666	339.698	1244.69	1937.31	4527.47	42.241	736.315	200.194	1041.78	942.377	1714.12	1303.29
K00831	4701.32	4289.01	4570.82	581.479	810.989	1085.8	2342.22	390.048	1444.7	1608.37	1115.87	722.894	533.269	544.65	2312.92	1247.13	1066.9	486.144	114.766	668.496	216.381	1310.89	1967.77	3547	5161.64	3210.92	3090.2	2774.86	3508.11	1485.25	6763.31	2841.24	89.6718	334.949	2250.31	5326.64	2363.49	188.38	360.934	1016.95	2417.7	4087.2	65.0064	465.955	167.598	917.214	1291.53	1452.52	771.556
K02500	3961.67	3237.16	3878.08	704.178	1100.88	1602.99	1926.52	374.565	1991.48	2092.41	1306.51	896.024	1223.72	619.304	2721.14	1467.57	1334.99	666.328	1132.02	617.579	294.278	2530.76	2514.86	8156.9	5076.93	3033.87	2275.69	2756.59	4272.24	1123.48	4761.27	2342.85	104.657	285.296	1921.39	4138.8	2436.89	158.112	292.352	1065.63	2130.7	4030.07	71.0126	237.189	272.001	1285.88	1451.03	1659.8	842.871
K01586	3818.13	3196.8	3875.12	668.646	819.882	1215.94	2703.07	507.27	2369.48	2023.79	1441.7	819.588	892.189	720.172	2035.42	1099.86	1245.48	517.812	964.229	647.693	236.617	3279.47	2430.72	4112.22	4869.42	3370.66	2541.61	2750.77	4696.67	1275.67	6236.55	2436.74	133.758	285.923	2397.91	4612.8	2487.36	161.443	290.726	1117.69	2222.21	3703.16	81.7522	398.683	259.848	1043.49	1430.72	1743.96	719.311
K00790	3127.76	3750.29	3316.21	390.685	1155.45	1042.53	1604.01	279.825	2356.68	2141.87	1351.24	1233.85	1382.96	566.482	1668.22	976.07	1156.5	862.591	872.305	875.193	400.16	3908.77	2319.77	6062.06	3763.69	3774.46	2975.22	3187.57	3634.35	1605.14	4766.75	2508.55	90.4253	192.148	1755.64	3721.35	1707.35	191.861	293.66	1141.35	2917.72	3612.01	94.8345	966.047	549.322	1790.03	1170.15	1630.63	837.797
K02884	4474.78	6222.14	6206.86	518.186	987.22	829.274	1533.08	242.129	1572.66	1455.29	1077.12	833.991	951.291	676.915	2540.06	1262.18	1057.03	570.558	763.933	607.179	252.912	2989.01	2556.28	2586.23	4250.58	5311.98	3256.88	3446.74	3233.02	1070.11	5402.52	2492.74	72.7829	441.18	2062.36	5643.68	1693.93	177.865	410.971	1036.62	2694.69	2959.48	73.7635	590.356	361.767	737.052	1113.72	1052.99	717.228
K02015	3548.13	1981.44	1984.08	413.085	3877.75	1081.02	1558.28	168.912	1478.45	1463.26	1325.61	2720.5	1829.92	401.978	1459.51	1112.23	1063.4	1514.1	202.927	1206.87	360.306	10883	5215.11	4315.1	4723.44	3099.92	2874.46	1927.84	3150.76	1369.24	5504.06	3518.53	147.908	262.203	2291.77	3639.47	1043.39	142.216	211.079	1199.81	2433.44	3065.08	99.8833	913.437	379.882	938.522	1732.09	1522.63	679.422
K02519	3876.4	3814.42	4316.55	614.015	943.152	1529.52	1749.29	282.159	2125.3	2010.33	1258.12	1078.97	1289.18	1400.73	2552.65	1273.24	1377.45	902.427	893.039	784.844	326.743	2649.06	2402.51	4703.77	3820.9	4474.81	2714.49	3005.27	3296.85	1057.21	4757.07	2160.35	95.7168	315.972	1951.55	4619.19	2218.76	148.814	284.239	1021.44	2580.62	3799.26	94.6174	805.797	470.339	1301.68	1223.03	1449.25	832.946
K03723	3439.47	2822.58	3331.24	532.65	1102.64	1257.06	2131.55	384.646	2018.57	1966.64	1250.14	1131.98	898.484	723.928	1940.35	1066.87	1434.57	937.851	323.762	756.746	438.943	3381.8	2356.32	7372	4186.38	2780.79	2321.4	2551.57	4444.92	1375.74	4933.67	2315.87	91.0055	321.31	2084.11	4016.3	2370.48	175.233	302.731	1195.53	2555.93	4230.98	83.7827	682.137	444.737	1432.39	1207.95	1470.76	931.532
K00046	3980.02	3267.84	4315.95	775.368	1171.65	1251.23	2023.11	274.501	2009.38	1775.43	1024.29	981.545	1023.87	686.105	1623.55	1054.56	1509.1	1066.4	352.136	733.342	152.145	409.657	2376.27	7821.71	4688.63	3439.76	3038.24	2134.85	3458.57	989.31	4962.45	2234.17	158.953	420.815	2376.67	5409.85	2965.96	309.688	432.845	1391.46	2524.71	3678.75	55.6651	296.139	264.71	786.826	1315.38	1357.94	957.041
K03686	2980.13	1783.57	2930.55	588.314	644.09	1533.84	1763.97	357.897	3117.64	2819.83	1308.44	923.104	1071.96	1322	1571.15	826.132	1291.16	900.994	907.076	796.123	245.222	2469.86	2245.37	10007.2	5287.77	2499.41	1780.17	2485.12	6472.92	884.874	4560.03	2206.64	81.348	314.953	1985.76	3612.09	1947.4	210.479	275.336	1415.64	2526.41	5255.78	73.3807	513.572	280.259	1067.65	1084.61	1583.42	915.376
K09014	3824.99	4988.96	4552.53	1107.55	97.6638	1454.8	1826.73	230.897	1275.62	1026.12	1362.29	1286.2	1053.57	1349.17	1715.8	1095.74	1155.61	594.42	983.981	600.161	191.29	3411.14	2565.49	1748.06	3199.11	5591.31	3931.68	3514.67	2209.8	1721.22	5407.23	2440.41	113.182	316.993	2334.45	5348.95	2337.99	134.458	324.712	741.243	2707.78	2680.51	94.0703	1325.1	465.959	948.544	1341.25	1474.94	988.178
K07478	3500.17	3392.4	3515.87	844.79	1287.34	1544.4	1822.28	301.93	2594.85	2116.9	1348.43	1402.75	1883.1	1122.78	2249.88	1321.34	1166.61	1278.09	1694.66	870.374	380.103	2952.7	2024.5	5165.33	4114.08	3382.02	2469.12	2773.56	3595.96	1217.11	4921.01	2368.61	83.4531	259.445	1832.52	3823.65	2078.76	149.446	255.204	1118.34	2289.54	3441.31	89.3084	969.699	419.251	1262.19	1547.77	1604.9	880.508
K14652	4870.97	4960.44	5307.73	287.359	81.4192	1037.45	2330.32	334.901	1313.94	1312.36	1123.39	1238.91	1241.75	316.63	1062.62	679.343	1446.72	728.175	1045.39	768.046	580.183	1367.94	2915.73	2513.51	4558.46	4730.2	3342.09	3163.61	4028.04	1674.83	5382.09	2360.51	53.497	190.54	1929.18	5732.28	2171.99	205.874	309.643	909.576	3089.88	3427.27	71.9223	602.043	332.669	735.037	1113.59	1062.37	555.234
K06217	4058.48	3315.21	3915.14	973.378	1594.56	1548.78	2426.36	426.591	1969.73	1898.91	1469.08	1260.09	1109.73	687.56	2688.41	1433.38	1496.2	698.508	247.838	847.07	368.826	3818.89	2225.34	3313.53	3757.94	3155.12	2911.8	2624.37	3122.74	1530.28	5367.38	2622.78	82.4705	321.244	2344.76	4283.33	2068.63	133.368	258.078	982.632	2302.56	3323.79	107.256	1211.63	484.733	1131.12	1365.87	1521.12	1058.38
K09458	3259.31	4431.87	4998.28	356.866	536.749	1306.97	1816.79	299.516	2006.55	1692.24	981.396	1259.67	1226.79	393.322	2455.51	1260.66	1575.17	673.528	936.515	675.869	219.134	2662.66	2453.18	6136.75	4268.84	4733.72	3250.92	3230.66	3570.39	967.404	4990.54	2194.86	97.6337	388.38	1899.14	4612.73	1923.31	154.725	321.507	1035.8	2605.06	2782.23	79.4781	534.587	311.745	1148.77	1227.51	1488.12	764.96
K01493	4019.52	4393.69	4732.86	567.995	335.847	1250.59	1621.01	299.582	1734.55	1875.69	1069.22	1092.33	1418.45	625.469	1681.45	1001.81	1313.97	747.718	1009.13	659.331	505.266	2182.34	2370.82	3281.92	4698.05	4284.59	3292.98	3059.1	4033.12	1133.47	5554.91	2381.35	86.6039	276.65	1982.13	5173.01	2324.6	193.815	238.813	900.782	2208.07	3157.25	82.1908	872.588	483.329	1255.92	1207.81	1672.98	805.583
K00821	3743.49	3040.02	3634.8	449.647	787.841	1367.9	2150.16	357.709	2012.39	2045.67	1185.33	1109.31	982.424	521.73	1442.01	934.358	1132.93	708.609	1096.74	653.271	250.605	2572.76	2479.77	6523.2	4661.42	3416.78	2699.7	3170.83	4999.39	951.988	4999.5	2286.84	67.174	246.058	1984.45	3804.08	2367.12	208.595	300.012	1208.19	2446.54	4046.8	55.2787	493.706	230.044	1104.9	1201.92	1443.48	970.726
K02026	2741.15	1864.26	3493.31	557.091	211.98	1311.21	2545.7	607.827	3036.63	3252.78	2212.45	17.3729	233.439	701.562	1605.04	801.769	1307.83	301.779	29.7863	472.228	19.7426	1584.19	2438.86	6181.13	7179.51	1959.07	1401.53	2533.07	6865.07	198.018	5119.86	1410.71	90.7986	438.605	2159.16	4114.55	3370.91	183.765	340.054	1838.01	1769.72	5685.89	61.2265	145.902	137.423	888.253	854.449	1453.21	931.872
K04487	2687.79	1855.2	3125.4	534.367	845.877	1683.68	2486.7	430.61	3907.61	3375.18	1036.14	196.648	617.474	648.734	2109.07	885.831	1512.28	1028.44	538.411	573.111	76.5887	2603.48	1807.82	9862.41	6939.18	1590.17	1259.46	2218.01	5990.7	184.094	5233.75	1275.77	107.985	400.841	2059.99	3553.17	2468.34	200.8	255.622	1447.63	1557.07	4544.5	70.0594	166.774	230.082	1278.43	1068	1804.74	1189.42
K03665	3681.42	3912.27	4579.5	344.089	887.433	1276.26	1866.4	305.535	2047.3	1927.22	1168.52	1170.72	1204.84	442.277	1728.15	1000.5	1479.17	753.178	879.287	747.238	284.159	1726.43	1772.2	5269.66	3878.46	4673.67	2770.93	3406.59	3635.84	1182.01	4734.06	2140.52	84.6669	307.955	2151.1	4621.73	2057.96	169.334	317.547	1141.01	2720.27	3564.38	60.7057	543.444	303.892	1099.59	1078.21	1215.42	751.61
K09903	3787.7	4116.16	4723.38	468.524	947.742	1159.62	1640.3	306.133	2066.2	1940.12	1192.12	1112.83	1472.57	1098.85	1886.25	1128.16	1325.06	666.825	1118.34	811.091	364.025	2835.64	2180.15	3536.23	4091.72	4765.87	3109.56	3212.45	3364.59	956.301	5008.78	2328.2	104.632	345.881	2078.25	4816.21	1715.51	152.835	241.567	889.432	2226.54	3392.64	99.518	921.173	429.187	1111.34	1194.76	1298.8	628.978
K02563	3448.15	3721.92	3863.49	482.927	942.553	1275.06	1854.05	321.437	2112.53	1998.1	1183.66	1203.56	1245.22	575.553	1471.12	906.75	1292.35	930.841	990.453	643.03	276.953	3055.37	2493.31	6688.04	4465.43	3626.01	2547.17	3072.64	4811.96	928.37	4356.39	2168.65	75.3563	359.099	1827.21	3649.22	2129.09	145.814	276.936	1084.11	2504.98	3704.84	90.9597	398.885	266.371	1113.06	1155.63	1509.73	701.054
K00705	3028.76	2401.37	3152.18	399.065	855.871	1173.12	2068.8	370.48	2566.59	2269.93	1504.31	750.779	870.119	597.397	2832.25	1333.52	1244.41	835.433	931.668	609.464	171.159	1285.38	1868.32	7793.34	5293.49	3219.27	2104.55	2225.84	4120.35	1181.64	4282.7	2172.32	91.17	275.397	1756.81	3463.24	1844.91	209.759	376.23	1431.71	2907.43	5012.78	55.9047	155.515	165.876	962.059	1200.56	1480.82	970.639
K03308	3963.71	3228.63	4006.5	708.64	243.428	1248.72	2311.04	381.171	1854.6	1958.32	1261.63	765.312	568.433	1087.15	2966.97	1483.57	1369.67	931.069	141.335	615.371	123.352	153.548	1571.36	4109.92	7199.49	2246.43	2946.71	2702.35	5639.65	713.543	6360.97	2479.39	77.3058	265.736	1586.47	4692.78	1507.07	244.435	369.852	1431.24	2510.07	4655.53	48.3691	355.107	225.685	903.742	1575.63	2058.45	1184.93
K03979	3327.28	3753.55	4365.92	524.958	709.221	1348.67	1576.34	288.302	1977.45	1968.74	1370.91	1076.77	1184.9	642.103	2417.23	1310.83	1546.71	853.12	862.845	740.354	273.568	2618.68	2333.08	5253.25	3666.31	4283.09	2716.19	3296.16	3525.69	1039.54	4605.8	2151.5	75.2627	310.082	1843.03	4085.71	2044.42	154.439	290.122	960.598	2581.99	3463.73	79.4587	604.138	409.654	1373.29	1209.6	1412.83	837.015
K02963	4258.39	4780.08	4679.78	886.729	1099.76	1168.96	643.778	68.1579	1809.77	1711.62	1403.19	777.244	1179.37	1664.15	2514.44	1330.82	1261.15	836.317	777.654	499.03	369.085	2581.03	2214.22	3505.67	5029.58	3891.76	3189.1	3199.49	3613.01	342.772	5603.15	2357.6	103.086	308.066	2306.18	5316.91	1065.62	183.39	327.47	975.206	2566.25	3361.29	85.829	885.157	475.93	1023.18	1152.76	1300.43	933.148
K00611	2977.93	2001.74	3097.62	1019.55	945.919	1874.78	2094.62	364.746	2562.14	2566.62	1093.85	396.158	688.708	793.777	3285.51	1411.51	1329.77	1106.14	753.227	589.153	170.179	2849.64	2001.74	9895.89	5780.41	1841.15	1407.54	1997.67	5684.95	282	4445.94	1349.46	108.142	355.264	1686.29	2915.03	2596.44	172.454	268.582	1232.42	1665.48	4567.28	88.6745	821.778	303.298	1092.38	1211.56	1599.37	1257.18
K09157	3163.11	2954.13	3669.53	1194.45	709.451	1887.18	1806.54	339.905	2535.02	2434.89	1570.14	342.756	625.713	1398.39	2511.54	1300.83	1673.96	1056.3	151.74	539.188	313.908	2245.1	2084.48	8610.82	4914.55	2283.76	2015.89	2886.89	4113.97	229.012	4641.72	1194.18	66.7356	311.434	1796.58	3688.85	2235.25	76.2058	225.881	841.295	1790.21	3851.26	84.2524	731.433	483.367	1575.74	1068.97	1639.67	1220.69
K01928	3298.9	3864.48	4527.08	304.337	734.151	1075.95	1665.76	278.473	1877.66	1721.97	1124.26	1032.64	973.044	432.757	1750.28	990.681	1535.03	627.022	1099.15	714.401	185.745	3187.38	2690.44	4401.64	3979.46	5003.43	2818.06	3567.5	3368.96	1151.74	4060.71	2146.16	83.2553	340.75	1770.23	4371.41	2174.69	154.259	341.035	996.957	2390.12	3337.66	65.0833	325.167	187.582	1058.98	1157.13	1370.68	611.759
K00058	3264.44	3739.36	4199.9	421.603	1183.3	1223.72	2526.5	429.784	1933.62	1846.58	1051.81	827.621	977.748	609.616	1929.02	934.553	1361.46	575.066	952.262	687.583	257.24	1555.27	1813.76	5093.16	4025.26	3792.88	2296.55	2917.21	4165.24	1137.37	4894.71	2164.88	113.34	353.101	1931.55	4648.26	2112.51	180.329	340.772	1124.9	2431.25	3703.6	75.5464	454.703	289.942	934.166	1142.36	1459.27	740.051
K02879	3545.72	3499.93	4048.81	470.704	859.753	1087.67	1694.28	317.139	2324.96	2314.67	1186.09	819.646	1309.01	2184.06	2352.1	1104.41	978.76	386.917	716.898	510.805	310.548	3512.4	2273.76	2884.48	5415.04	3184.2	2807.64	2518.96	4076.86	795.757	4948.93	2352.93	97.2146	334.08	2055.59	4804.25	1941.36	185.97	292.585	1042.89	2124.66	3778.2	44.0499	1015.88	463.623	936.875	906.677	1105.66	951.805
K01662	3489.54	3715.64	4121.7	410.896	885.71	1050.8	2250.03	380.485	1370.74	1640.21	1410.75	1157.52	1025.5	692.567	2053.66	1141.98	1637	629.01	1036.45	813.127	256.078	1266.12	2063.75	2591.58	3662.87	4844.53	3227.27	3533.2	3227.11	1358.03	5198.61	2610.76	59.7372	272.579	1652.4	4839.46	1352.6	214.142	346.804	1060.09	2839.3	2876.23	46.9221	369.196	194.244	1208.33	1407.92	1730.96	923.221
K00925	3450.97	2611.6	3290.46	539.26	582.529	1220.91	2354.45	417.548	1967.14	1879.99	1151.86	816.001	719.941	518.353	1479.8	866.754	1118.5	620.131	194.965	652.109	242.551	3403.17	2578.15	4646.48	4102.83	2686.04	2589.48	2632.7	3790.43	1310.6	5324.99	2262.25	119.268	329.215	2205.96	4439.81	2728.54	215.294	272.043	1064.1	2416.09	4061.91	70.7501	608.812	354.581	1158.58	1314.99	1437.66	853.864
K02115	2686.91	2283.09	3260.87	398.708	842.404	1580.6	2181.53	460.485	2472.05	2551.39	1125.22	612.779	740.944	434.714	1637.1	840.808	969.572	725.792	992.64	631.457	91.9464	3053.78	2247.62	6148.77	5272.71	2915.71	1839.27	2584.66	6205.12	513.803	4717.81	1689.75	136.5	317.812	1843.9	3765.43	1854.36	183.842	317.579	1342.07	2237.56	4028.13	64.5453	128.536	180.375	1210.91	1223.04	1666.86	917.864
K02518	4629.86	5918.12	5659.43	939.092	623.522	850.24	233.404	53.6572	1835.5	1547.93	1214.95	804.298	881.108	1629.65	2896.36	1164.02	752.118	152.554	574.298	612.054	389.469	2848.18	2292.78	1323	5967.82	3953.26	3693.88	2771.05	3262.64	233.058	6144.59	2861.31	91.8383	217.322	2369.5	5225.8	476.229	163.602	265.775	890.706	2650.61	2673.11	56.0363	1519.61	379.114	525.827	906.096	1292.2	621.282
K05833	3417.93	2343.58	3219.56	1007.65	517.996	2067.16	1898.14	340.068	3961.88	3472.86	1287.76	276.52	493.143	657.666	2223.86	992.396	1164.47	864.887	83.7624	584.223	116.15	2735.47	2061.55	8917.05	5889.01	1237.5	1420.55	1937.36	6050.48	131.695	4491.39	1292.98	97.0464	387.522	2200.69	3782	2956.17	178.785	206.341	1251.8	1499.28	3884.88	48.9953	401.79	275.32	1205.84	1025.11	1716.17	1073.63
K03797	4255.98	2921.79	2787.36	99.2206	555.694	600.59	2318.59	276.105	956.336	936.356	850.088	2642.95	1395.36	219.161	1516.46	1080.3	754.636	1106.52	1013.42	946.228	314.393	2016.4	2731.14	2592.1	2355.11	3801.92	3548.67	2277.43	2742.65	2753.37	5667.04	4172.2	57.8117	132.361	1879.74	5324.5	1324.65	343.426	420.71	1509.26	3680.68	3011.86	92.3237	534.291	192.404	589.243	1798.65	1264.03	618.5
K04069	3287.62	2218.77	2139.08	500.256	2548.5	1077.04	2372.75	330.109	2182.68	1809.3	1048.42	1055.21	1104.54	444.431	1446.48	892.568	1039.37	772.226	1603.67	721.834	205.349	5036.19	2727.67	5839.69	3730.89	3260.76	2165.31	2146.15	3925.5	971.384	4217.74	2198.21	134.061	300.826	2002.28	3501.76	1785.07	160.176	291.445	1091.15	2688.5	4362.67	67.8249	345.332	201.028	734.714	1392.78	1435.56	655.047
K02892	4113.93	5580.71	5178.99	500.047	537.747	960.515	1544.5	239.576	1686.36	1490.89	927.791	759.719	693.431	332.35	1908.34	988.699	807.667	150.421	880.154	507.207	93.8561	2235.12	2821.03	2295.21	4956.91	4525.79	3397.09	2721.38	3600.04	695.03	5338.08	2379.32	99.6442	408.368	2056.73	5136.24	1889.56	127.183	422.202	1106.62	2460.87	3453.56	35.7657	275.355	98.6658	699.533	1178.31	1220.69	444.635
K03110	3677.22	3735.29	4327.9	554.262	689.839	1290.07	1852.57	244.599	2055.35	1826.51	1126.03	1086.31	1199.56	830.756	1888.85	934.096	1531.29	762.544	926.447	635.589	377.708	2367.93	2213.76	6336.87	3853.85	3734.34	2572.74	2865.77	3543.8	1126.71	4553.66	2258	86.3537	326.094	1813.95	4148.05	1843.73	167.864	256.5	1060.21	2249.78	3419	85.2037	629.195	464.139	1205.24	974.636	1070.79	779.118
K03703	3608.26	3389.8	3594.65	387.816	677.279	1076.94	2034.17	326.776	2085.18	1991.66	1038.16	1047.73	1039.25	520.377	1506.39	865.523	985.552	622.459	870.382	656.283	207.737	3341.8	2476.94	4597.34	4188.46	3348.01	2615.16	2633.46	3692.26	1481.88	4658.33	2476.71	87.5439	282.803	1917.62	4191.68	1970.78	190.587	285.36	1101.87	2380.84	3578.13	81.3171	524.513	260.49	954.156	1108.54	1386.99	669.956
K00145	3361.93	2595.37	3358.06	406.499	870.582	1249.24	1911.37	311.757	1791.73	1824.28	1241.03	970.195	813.832	338.45	3378.72	1570.71	1039.42	642.243	960.938	704.703	172.975	2395.74	2134.7	6107.1	4474.36	2443.23	2064.53	2362.21	3576.83	1183.79	5434.96	2595.67	94.8985	258.27	2155.06	4145.35	2515.41	161.986	239.195	1068.41	2299.6	3785.13	53.8353	305.356	120.628	836.875	1449.11	1531.91	748.788
K10117	3024.77	2512.3	3270.56	594.228	288.901	907.388	2661.31	831.611	2900.44	2444.61	2471.53	23.0224	187.128	735.949	1281.56	540.543	1141.6	239.873	48.6684	451.812	16.5879	132.128	1581.64	4028.62	6266.06	2806.84	1384.33	3045.73	8342.57	110.714	3647.57	1234	65.2207	278.035	1542.26	2581.88	2394.98	177.444	258.945	1670.95	2466.69	6509.45	66.9946	129.48	110.26	429.498	1208.08	1296.26	710.861
K02313	3214.18	2845.78	3149.57	343.166	860.805	971.758	2157.32	457.208	1745.43	1501.41	1007.01	940.821	999.908	532.161	1812.28	906.678	1090.18	389.599	887.305	562.858	225.331	3386.53	2240.41	3886.78	4725.51	3183.95	2346.35	2626.55	4670.85	1307.29	5339.19	2242.65	119.701	281.97	2088.89	4237.31	2284.55	153.839	277.276	1047.93	2375.15	4366.83	80.4366	463.35	255.752	752.061	1084.12	1166.96	627.625
K04485	3312.94	3580.33	4136.03	464.838	1037.73	1055.19	2104.85	333.403	1930.72	1763.06	1278.47	1143.17	945.446	469.962	1808.35	1094.94	1344.55	646.318	179.534	662.48	355.1	3092.55	2395.61	3477.6	3585.58	3319.79	2733.98	3012.86	3280.12	1278.89	4535.08	2207.83	96.5751	311.032	2101.06	4457.86	2251.55	161.208	265.077	1008.97	2439.41	3229.9	100.147	597.903	334.74	1040.69	1145.86	1270.9	750.214
K01056	2806.6	3327.47	3754.84	414.024	355.772	1349.12	1662.75	319.834	1666.44	1642.86	878.095	863.959	893.254	573.536	1614.8	905.047	1184.27	746.708	980.039	647.324	167.302	3076.47	2340.13	6327.97	3691.93	3607.51	2260.49	2878.95	4401.8	1160.75	4196.34	2082.22	58.231	371.658	2022.71	4519.07	1978.61	209.325	299.445	1117.48	2490.76	3753.23	59.65	452.862	272.148	1267.64	923.487	1358.51	690.118
K01938	3551.68	2698.96	2585.92	813.176	609.182	1444.71	1942.14	416.2	2902.95	2451.2	1517.38	658.001	1146.61	1366.9	1991.82	1011.93	1051.99	684.026	880.664	613.562	273.34	2507.87	2108.06	5645.73	4540.46	2693.22	1978.48	1985.26	3823.51	897.023	5093.78	1958.55	70.1915	230.276	1787.4	4154.54	2392.12	169.718	211.232	1000.76	2122.47	4205.05	86.5354	856.503	458.047	1297.27	1281.74	1511.75	810.318
K02909	4913.61	5446.92	5936.12	606.507	1034.56	789.678	728.092	42.1755	1365.38	1405.53	1191.45	702.383	819.959	1104.62	2482.62	1132.63	621.985	130.103	585.237	503.553	280.408	3216.9	2193.99	1526.69	5102.4	3643.18	3496.94	2751.62	3141.93	544.309	5495.12	2672.28	127.315	408.977	2557.05	5764.61	728.043	108.296	330.91	934.258	2192.9	3340.26	51.6243	595.811	165.36	346.358	1164.94	1061.81	523.155
K01752	2876.78	1906.16	2275.15	275.239	1766.18	992.918	1670.09	239.09	2904.11	2095.5	1251.74	1099.12	1005.69	871.889	1016.65	735.183	962.753	908.153	982.55	754.245	219.161	5825.86	3107.34	9466.6	4400.42	2508.58	1825.43	2520.11	3316.59	892.646	4040.16	1987.78	133.595	294.682	1992.57	3608.17	1674.96	176.928	242.963	947.99	2420.56	4232.03	77.7322	431.406	246.273	730.357	984.504	1020.56	796.726
K02025	2441.46	1944.13	3205.14	476.461	286.958	1023.69	2273	570.842	2533.86	2887.17	1984.33	39.9291	247.39	561.579	2246.22	1066.01	1117.11	82.8362	27.766	391.446	29.8412	1200.39	2224.26	5660.02	7255.33	1842.08	1304.2	2244.35	5899.14	182.763	5869.72	1509.99	99.6907	418.185	2048.16	3798.55	3454.64	244.046	362.302	1605.84	1551.37	4859.51	100.19	116.732	124.787	1168.56	966.748	1655.66	928.234
K01520	3857.27	3621.5	3556.52	810.282	1240.02	1228.98	1687.66	308.712	2655.58	2141.75	1584.33	959.635	405.294	660.893	1303.24	819.514	1504.09	672.598	51.9732	715.078	130.221	2871.36	2406.54	6918.78	3785.59	2688.77	2752.45	2784.24	3450.77	961.818	4023.72	2234.26	91.6944	243.523	1704.66	3940.98	1606.18	171.472	231.822	1015.82	2736.09	4167.19	33.2538	177.566	192.946	823.153	1504.91	1621.87	612.797
K00239	4053.47	4834.51	4772.81	258.082	626.163	651.634	1564.56	190.239	383.554	562.573	1090.62	1546.65	1510.96	383.314	1135.27	791.92	1341.45	456.47	1103.88	582.61	288.999	2408.65	3035.6	2122.94	3044.56	6464.64	3534.72	3386.54	1975.37	1601.16	5198.23	2506.14	45.0426	247.987	1726.98	5232.46	2381.17	147.076	351.514	766.691	3084.84	2934.24	77.3342	757.92	320.236	911.381	1000.01	836.515	568.778
K10206	4315.38	3048.2	3748.17	296.838	136.04	806.902	2142.41	315.681	1371.51	1581.47	1581.35	1134.39	671.365	237.729	2510.14	1462.14	1078.15	929.972	160.492	706.833	146.733	1670.48	2604.96	3456.09	4053.23	2762.38	2866.73	2314.03	3271.43	1764.1	6345.19	3143.85	64.8914	239.979	2105.54	5231.01	1964.31	234.529	286.544	1088.93	2572.17	3546.92	86.2638	433.173	245.103	936.255	1559.49	1438.56	642.742
K10773	3446.5	2503.48	2977.92	658.031	598.797	1347.85	1932.18	369.255	2065.43	2149.35	1491.02	1063.88	1199.25	1100.54	2796.1	1386.37	1161.15	710.336	971.685	702.929	200.026	2823.27	2136.69	4635.1	3968.38	2592.58	2112.92	2045.22	4207.83	1360.75	5166.38	2517.05	60.9758	245.568	1853.88	3680.49	2039.89	176.947	220.825	1139.08	2364.77	4097.35	57.9019	553.16	263.144	959.134	1371.96	1433.77	751.639
K01924	3291.82	3336.03	3964.4	405.958	694.245	961.66	1768.58	302.473	2160.48	2027.19	1020.87	961.389	730.795	565.475	1276.65	707.263	1081.89	651.523	133.429	682.398	222.055	3280.28	2545	5042.53	4244.28	3320.52	2443.19	2936.12	4017.77	1044.23	4125.45	2047.36	65.7028	290.791	1904.29	4410.45	2083.92	195.926	303.607	1165.5	2549.16	3923.05	73.6251	443.765	217.146	1049.8	1034.17	1050.52	752.446
K03555	3614.59	3559.46	3951.84	315.175	927.833	1076.75	2117.72	324.55	2207.21	1841.76	1082.57	1437.15	1307.81	335.116	1965.96	1144.47	1212	531.66	1114.56	733.59	287.775	3183.47	2409.61	3292	3566.29	3606.37	2876.3	2838.01	2927.75	1584.65	5249.98	2482.02	63.9939	266.05	2051.61	4412.02	2025.55	187.295	305.388	970.881	2273.92	2774.8	70.8946	587.451	257.269	776.624	1298.65	1420.93	675.346
K06871	4110.68	2744.01	3330.58	433.621	1764.21	987.543	2942.21	466.06	1786.77	1861.09	761.858	570.929	479.448	500.113	2446.43	1104.1	900.038	497.095	71.6967	691.386	216.389	3931.17	2526.09	3229.33	5660.61	1631.29	2205.03	1579.42	3429.74	1385.85	5963.79	2469.79	151.632	279.159	2197.51	4614.81	2578.35	210.547	208.088	1003.8	1890.61	3471.94	65.4898	546.33	156.674	636.871	1207.7	1245.87	677.831
K06187	3273.33	2719.92	3041.12	598.575	975.305	1231.06	1571.56	349.098	1854.06	1799.96	1275.85	1217.58	1208.39	565.869	2144.28	1266.84	1070.48	852.135	1152.25	791.825	322.743	3094.91	2294.92	3955.99	3973.62	3242.52	2247.93	2596.03	3987.89	1146.94	5090.98	2307.87	88.2668	266.21	1890.4	4010.99	2005.01	183.778	205.614	861.243	2247.38	3702.53	86.721	655.77	267.607	1055.14	1370.29	1603.76	664.583
K09013	3253.55	4794.56	4664.26	587.165	174.983	1052.2	1798.63	287.324	1467.18	1139.58	1324.19	1386.59	1245.67	889.798	1414.54	842.442	1290.06	556.337	1117.72	664.787	331.92	3322.9	2189.47	1292.25	3468.42	4532.78	3222.75	3259.33	3117.2	1626.13	4322.32	2305.39	102.78	319.515	2126.93	4783.34	1675.94	147.546	363.914	750.534	2801.58	2330.7	71.014	828.539	415.988	716.662	1135.7	1103.34	628.799
K01921	2606.31	3149.25	3520.82	318.454	1406.53	1194.86	1914.95	329.485	2120.56	1793.46	1069.31	1279.41	1199.33	371.211	1392.95	833.729	973.12	679.468	1725.47	760.456	213.366	4002.66	2265.83	5069.29	3391.41	4308.26	2399.34	2789.73	3811.81	1175.11	3963.73	1713.49	118.173	303.6	1872.61	3981.38	1795.57	192.574	315.203	996.656	2333.66	3403.37	47.6741	209.512	150.901	743.756	1191.18	1339.55	549.314
K00012	3404.05	3431.77	3113.47	545.011	369.711	734.92	2039.17	305.245	816.262	859.55	2140.5	1146.12	810.206	1911.95	1263.38	789.15	1610.26	277.082	936.989	657.774	136.244	2591.89	2425.59	1118.92	4453.74	5654.05	4279.88	2942.31	2536.09	1387.63	6725.63	2792.31	108.053	252.589	2163.88	4014.81	1964.3	108.183	275.074	461.639	2341.75	2381.25	44.6761	231.106	109.237	289.65	2001.76	1755.19	697.369
K07407	3122.19	2504.93	2221.56	318.376	102.481	1261.22	1603.31	376.314	1718.21	1808.57	1405.31	1212.89	1156.47	835.802	1696.59	887.89	1025.4	212.25	1741.96	685.629	85.7635	825.614	2092.74	3787.86	4728.22	4477.25	2576.53	2317.57	4276.62	1105.49	4497.67	2472.6	26.0395	173.544	1779.03	3777.6	2052.03	204.161	421.624	1319.54	2800.89	4411.88	46.0799	120.144	96.534	1093.52	1578.76	1817.24	888.923
K02108	3287.96	2058.24	3214.11	347.661	651.327	1321.98	2347.28	398.447	2513.78	2292.96	1009.34	471.424	464.124	612.119	1544.76	747.078	954.921	484.672	612.922	499.676	30.6913	2487.73	2346.59	4611.02	5882.78	2431.71	1912.25	2232.47	5413.94	673.15	5355.12	1831.12	123.536	319.645	1982.31	4096.9	2457.2	235.036	311.478	1320.53	2041.3	4380.77	62.9959	182.48	141.028	1069.23	1156.42	1632.69	922.663
K03924	3132.59	3234.65	3612.48	220.718	728.924	1034.87	1797.33	291.331	758.142	1094	1215.11	1516.76	1897.43	474.669	1979.19	1226.96	1198.77	331.082	2411.52	872.179	275.173	1194.58	1706.09	1863.83	1371.67	5756.79	3281.73	2842.7	2455.52	2085.22	5587.66	3168.2	42.9726	200.805	1588.89	4030.76	1037.33	178.581	299.906	904.036	2860.1	3016.28	85.9042	620.498	280.266	1674.85	1292.21	1649.18	565.457
K02014	5250.95	3027.57	1823.8	70.9381	2517.3	507.798	2409.02	182.98	324.744	362.476	930.062	3810.22	2085.81	40.0087	1552.6	1174.09	647.307	715.445	1663.6	979.526	298.074	6504.17	4161.97	418.832	450.308	4026.19	3716.76	1528.49	732.359	1986.91	4963.09	4171.69	122.036	129.777	2733.7	5289.3	1058.69	267.74	332.616	1295.64	3090.12	1595.51	60.7573	813.84	246.046	337.17	1739.16	1185.7	406.086
K01870	3740.68	3881.44	3836.27	617.869	1353.96	987.926	2358.5	389.366	1547.06	1557.86	1442.59	1118.71	1358.3	566.474	2456.37	1303.5	1102.99	476.884	1052.1	683.626	379.933	3668.02	2382.35	1486.49	4105.21	4080.06	3037.77	2713.23	2774.53	1515.17	5522.01	2410.12	89.7365	227.789	1753.05	4043.61	1742.45	100.97	196.754	626.918	2144.66	2574.6	66.4576	740.388	295.053	898.063	1251.73	1555.64	744.231
K02005	4145.25	3464.32	3037.35	82.2716	88.3756	575.275	2002.97	284.545	1569.03	1399.22	928.079	1339.07	1123.56	166.869	1568.65	1019.46	807.186	857.606	736.448	785.497	152.174	627.439	2152.39	2589.32	2450.07	4316.8	3315.45	2085.64	2204.03	2258.28	5664.88	3385.71	16.7449	106.414	2073.26	5384.1	1329.71	295.86	441.42	1293.43	3636.11	2821.17	48.0991	305.107	127.801	610.204	1909.88	1382.96	620.926
K01734	3863.74	2477.62	3659.33	424.933	1082.57	1285.54	2695.19	355.474	1556.19	1941.3	864.135	748.022	791.609	415.277	3492.29	1421.43	1077.61	695.846	256.97	645.435	147.426	878.823	1503.81	4937.6	5232.59	1934.87	2625.36	1261.38	3163.93	1619.04	5674.79	2982.01	107.604	317.852	1944.85	4485.55	2261.08	275.805	283.47	1357.86	2325.92	3564.66	65.0034	750.526	236.365	895.392	1305.6	1614.62	925.871
K02881	3746.18	3897.29	3454.44	464.347	541.409	1200.06	1435.73	300.884	1853.66	1648.16	863.944	1150.06	1162.37	434.227	2522.36	1011.23	924.8	453.852	785.459	596.215	242.135	2314.48	2028.51	2916.53	4443.88	3620.63	2509.87	2840.58	3597.54	970.999	5398.88	2479.13	95.251	341.061	2172.24	4334.46	1568.92	205.594	373.491	1159.15	2325.74	3269.12	41.5098	602.709	325.449	1123.06	1025.34	1389.92	627.992
K01153	4422.12	3307.7	3912.54	498.701	429.072	716.456	3137.9	650.656	1212.97	1103.15	804.371	571.523	586.535	790.806	3459.88	1594.11	776.44	136.46	103.319	509.421	386.656	1204.1	1754.56	1427.52	5971.04	1891.93	2560.85	2327.28	3632.34	2469.95	5706.13	3144.8	136.728	350.342	2666.56	4219.84	1843.41	163.47	231.57	900.017	1394.95	3447.18	32.7269	642.566	123.308	260.517	960.53	891.684	599.871
K03168	3408.95	2811.17	3029.83	565.488	962.644	971.346	1708.5	333.513	2069.85	1873.2	1294.54	1154.14	927.151	1134.67	1750.81	962.413	1148.32	714.886	210.262	615.7	303.641	2737.97	2204.82	5358.73	4051.64	2617.89	2364.88	2502.85	3678.28	956.417	4492.44	2226.74	84.0129	254.904	1894.57	3748.07	2119.84	169.019	254.209	1110.6	2368.81	3782.93	90.9451	729.655	386.361	1030.72	1120.22	1205.17	773.392
K02956	3510.49	3795.19	4378.42	658.214	887.589	817.333	1074.49	256.311	2079.99	1794.21	1127.73	850.586	1120.03	732.537	2606.93	1309.9	906.926	447.303	764.949	711.619	276.636	3095.57	2255.5	2460.36	4451.38	3020.38	2850.15	2631.94	3310.25	599.891	4999.9	2522.53	98.5285	285.58	2314.78	4488.33	1207.35	192.652	298.675	908.458	2408.14	3363.87	65.3524	1401.26	256.608	562.072	821.938	1091.45	622.649
K02337	3251.42	2852.31	3238.19	455.493	1031.12	1049.45	2249.87	397.822	1708.12	1584.4	1137.89	1083.99	1065.5	516.059	1778.69	973.221	1155.68	513.06	903.17	670.291	252.307	2961.12	2363.57	2948.02	3752.15	3476.06	2640.87	2687.73	3610.19	1510.33	4926.32	2374.03	97.3359	275.165	1953.99	4072.06	2024.89	166.469	270.057	1001.19	2358.42	3492.25	77.2779	530.476	243.617	783.621	1205.72	1325.57	699.921
K00013	3204.3	2697.78	3273.19	818.464	960.449	1187.33	1990.75	312.527	1782.97	1705.3	1273.13	848.483	751.389	694.228	1993.58	985.315	1174.86	370.147	650.309	511.207	149.102	2424.39	2222.35	7589.43	4156.64	2835.49	2190.22	2139.47	3552.75	694.286	4370.07	1789.59	75.539	317.433	1804.15	3842.48	2342.59	167.145	245.878	1015.66	2054.57	3882.23	58.1141	595.643	213.264	951.73	1270.64	1397.19	770.508
K07240	3426.82	1733.41	2658.45	302.571	188.951	1066.9	1576.68	232.87	1782.51	2019.13	775.144	861.438	872.27	470.843	2387.67	1314.76	1413.42	1213.56	203.581	679.2	279.539	0	2126.04	5004.22	3052.45	2222.55	2424.69	1562.34	4486.88	1510.36	6252.49	3596.52	51.7639	123.034	1240.19	4698.33	581.491	412.881	357.727	1652.28	2506.03	2705.93	62.5414	316.49	152.691	674.765	1821.54	1827.67	1257.04
K02601	3433.93	2813.74	2885.82	436.96	1025.32	1169.02	2191.33	354.776	1974.59	1873.98	828.015	940.714	1011.3	902.417	2758.15	1206.86	829.865	475.966	963.367	561.119	194.025	3221.05	2041.27	2783.84	4522.88	2582.51	2240.72	2219.85	3633.7	1027.23	5871.41	2623.23	114.283	232.234	1918.89	3960.2	2256.19	148.982	317.094	1062.43	2126.78	3538.32	70.7253	597.133	226.488	1088.51	1008.06	1514.74	722.823
K00031	4274.46	3969.46	4579.2	344.313	570.155	991.904	2008.02	394.326	1409.58	1375.71	1229.8	525.841	773.204	414.652	2920.37	1462.82	932.101	342.572	695.776	631.626	193.984	938.311	1998.13	3507.66	4818.1	3851.56	2535.11	2824.66	3371.55	722.878	4719.6	1928.41	80.0471	299.314	1881.04	4098.11	2189.19	161.174	299.065	760.098	2288.5	3813.29	57.3688	236.546	198.082	714.123	1188.66	1371.1	680.651
K03424	2789.45	2352.55	2250.07	478.576	1604.06	1209.09	2065.43	278.898	2097.19	1658.45	1133.26	986.089	1165.72	471.665	1119.7	737.825	1023.42	584.097	1239.86	677.053	98.9615	4846.63	2456	6263.64	3221.8	3631.38	2008.41	2533.58	3832.75	707.997	3844.46	1616.3	101.871	286.922	2168.34	3338.24	1993.29	208.336	404.106	1079.53	2774.75	3849.55	42.5066	108	110.873	897.722	1161.8	1406.84	555.747
K03768	3568.19	3049.64	3384.61	519.99	793.258	1523.19	1221.17	143.486	2026.98	2375.84	1036.92	976.999	868.59	603.51	2596.67	1244.9	1262.88	1005.27	863.02	479.132	210.554	2714.57	2021.35	5737.84	4852.94	2860.46	2300.72	2483.26	4147.96	365.628	4492.77	2101.39	105.458	305.722	1599.11	3511.89	1232.4	181.871	343.169	1217.8	2243.62	3503.94	43.8175	430.571	247.267	1131.89	1021.42	1732.88	955.564
K00048	3659.02	2159.01	2954.64	1159.48	1147.79	1298.83	2619.79	413.975	1447.85	1732.34	1347.65	463.007	484.502	886.097	2624.39	1290.58	954.428	629.107	144.699	584.45	120.243	1918.18	2223.47	4420.53	5337.29	1718.34	2222.83	1610.43	3882.75	880.569	5663.53	1973.77	98.814	382.34	2308.34	3918.93	2752.55	201.136	206.42	955.306	1723.18	3442.95	84.0793	1032.41	226.193	787.814	1504.76	1667.26	946.615
K01775	2613.42	2718.39	3250.88	325.23	1321.35	1046.03	2031.22	344.413	2050.32	1772.51	871.539	1134.99	1030.12	529.048	1493.45	853.709	1335.1	656.027	1560.42	678.73	213.469	3724.7	2511.78	7095.83	3122.72	3796.79	2274.82	2731.73	3091.12	1091.09	3700.26	2031.84	76.5281	249.683	1509.26	3277.96	1330.42	177.344	248.466	1111.16	2346.19	3136.22	60.3354	237.963	152.096	934.783	1226.14	1466.52	687.469
K02027	1476.76	920.767	2627.13	466.975	551.629	959.268	2364.13	669.02	3484.29	3356.02	2196.07	65.1712	260.041	540.789	1748.1	892.661	1169.23	292.211	17.5298	343.031	38.7549	1990.65	1989.71	5844.89	4391.72	1865.81	932.994	2282.46	5176.96	240.922	3867.47	1191.01	68.4267	365.368	1901.43	2876.64	3041.27	144.549	222.864	1521.32	1913.95	5362.44	68.8018	122.603	155.15	1218.49	870.131	1343.98	855.31
K00845	2869.22	1803.01	2189.57	243.441	612.872	1320.33	1438.21	206.162	1815.96	1748.97	1182.42	1355.62	1412.46	402.877	1347.56	848.923	966.363	1011.54	1660.37	734.888	267.374	1396.92	1684.68	9475.52	3933.68	3645.21	2436.61	1983.85	3631.78	1359.61	4756.59	2757.46	56.7088	198.829	1606.24	3180.05	1074.36	250.037	319.59	1345.03	2473.89	3125.1	46.473	310.853	256.559	1180.22	1408.19	1557.67	773.543
K00625	3706.57	3626.68	3828.44	328.426	222.725	1135.98	1933.23	286.045	2113.33	1665.05	958.997	924.494	867.364	684.033	1113.87	761.874	999.231	773.153	794.884	644.893	193.169	2541.9	2544.12	2941.39	4266.58	3915.22	2694.59	2400.05	3140.23	1274.08	4990.49	2098.38	65.2837	250.971	2066.2	4956.62	2049.88	215.819	258.171	792.632	2443.02	3097.87	70.6305	453.244	305.258	706.497	1224.19	1189.22	741.411
K00554	2674.23	3212.35	3821.64	321.878	759.316	1039.76	1562.58	293.445	1496.48	1624.06	1389.35	1011.07	1195.9	819.89	2155.54	1101.43	1292.2	781.435	795.309	643.632	345.293	2397.45	2135.03	5828.54	3380.24	3259.57	2492.46	2931.82	2588.26	1423.64	4521.09	2117.16	81.9939	245.463	1752.68	3998.89	1446.92	128.465	282.496	922.129	2205.49	3109.16	85.3426	747.303	332.975	1109.76	858.58	1278.2	761.951
K01914	3733.83	4560.46	4913.21	281.387	1128.14	976.706	1896.93	324.317	2348.96	1950.13	1025.1	656.489	358.145	503.655	796.49	521.964	1224.12	411.718	38.8183	576.16	110.338	1642.95	1874.93	4611.19	4343.85	4012.24	2639	2857.78	3613.71	805.699	3922.11	1682.38	97.1183	387.839	2197.58	4958.49	2853.43	181.795	366.553	878.525	2433.02	3406.74	37.0635	147.896	142.974	625.313	947.964	838.727	572.497
K01206	5433.36	3595.25	2208.03	27.8333	60.1441	846.675	1613.52	173.106	1603.91	916.002	834.857	1870.44	1612.57	87.7501	1711.45	1121.88	272.307	504.275	1684.12	696.547	162.922	409.787	2594.41	353.308	1181.77	4879	3479.81	892.649	879.604	2140.11	5676.31	3038.15	4.7198	0	2496.04	5467.05	1800	378.25	558.808	1156.81	4588.23	4147.15	23.8385	126.43	47.4652	183.07	2305.2	1628.7	296.797
K01491	3167.88	3334.15	4093.62	241.264	735.859	825.92	1702.6	279.449	1627.53	1521.07	3034.26	1261.24	889.304	404.845	2356.05	1240.01	1334.69	642.179	848.817	599.277	197.073	2510.94	1941.39	4346.15	3078.57	3943.4	2491.96	3329.16	2521.93	1270.21	4209.44	2169.36	73.2259	261.542	1612.47	3735.93	1512.44	152.946	260.394	899.028	2371.24	2553.38	47.7653	317.849	189.874	712.572	959.034	1134.62	693.592
K00820	2938.95	2723.21	3072.97	726.894	932.185	865.347	1921.07	364.47	2029.08	2076.18	1290.08	561.716	642.836	766.803	2677.34	1276.89	1145.35	747.581	142.349	713.199	244.682	3624.66	2358.46	4596.2	3894.2	2357.25	1957.35	2265.82	3546.6	1231.73	4951.23	2282.09	104.696	268.272	1749.08	2940.65	1541.6	157.831	293.003	1040.49	2110.61	3548.53	50.7217	371.194	238.916	1046.88	1078.77	1342.3	762.674
K10112	3366.6	2063.14	2951.46	936.277	1295.96	1411.6	2101.79	479.393	2479.67	2475.8	1811.9	216.083	664.578	1017.96	3111.2	1430.74	1155.8	505.104	171.703	426.404	373.166	1878.17	1468.82	2987.56	5911.28	1628.63	1704.23	2000.39	4017.1	253.129	5116.75	1403.23	73.9645	243.444	1615.23	3381.74	2675.32	107.853	137.796	785.478	1623.1	4246.27	67.8571	485.058	370.353	1031.11	1263.88	1631.53	1297.26
K00640	3688.7	2819.48	3009.15	614.497	1292.36	1257.06	1829.76	262.924	2276.76	1867.45	1099.92	1150.01	989.502	487.165	1807.23	1058.96	955.737	670.796	912.254	754.634	190.71	2867.3	2247.3	5650.33	3555.63	2767.09	2224.12	1931.98	2946.28	1167.79	5094.3	2016.77	108.521	273.906	1816.21	4084.53	1811.77	181.264	244.231	1013.5	2543.43	3332.56	53.2261	338.452	181.715	776.251	1335.42	1676.7	743.032
K19157	4834.09	3314.32	2766.97	1570.21	1069.97	2830.94	1796.23	510.36	1092.49	2643.4	1706.14	214.38	452.47	353.876	1306.98	637.054	2547.39	767.374	89.0534	304.342	386.087	643.155	774.386	2812.17	1711.1	665.578	3145.27	1589.85	3274.56	272.649	10204.7	572.538	12.7033	129.123	2652.19	5635.17	3091.16	28.2316	68.4635	424.273	1650.23	4987.6	48.7444	182.685	194.304	246.224	1712.02	1752.37	1346.39
K00525	3398.56	1790.18	1936.51	825.087	1687.78	1568.2	2299.81	283.641	1658.27	1432.14	1293.7	1279.76	1351.08	361.494	1558.68	1060.11	1112.66	956.69	1057.74	859.447	620.698	4225.99	2523.92	3492.08	2550.96	2085.69	2207.55	1547.07	2045.31	1628.6	4110.53	2241.57	132.852	329.224	2709.54	4079.95	1926.13	202.314	339.419	1065.3	2410.68	2951.7	81.5638	1177.46	491.291	1002.11	1243.67	1150.48	1291.15
K01653	2977.51	3072.15	3289.64	526.748	1393.97	742.286	1986.67	432.956	2250.69	2062.21	1676.06	939.829	835.707	529.011	2062.41	1145.19	965.652	483.642	785.852	612.105	353.148	3856.79	1799.48	3940.66	4042.78	2884.96	2231.24	2197.4	3875.94	1109.11	4550.77	2338.57	93.5304	248.713	1720.97	3290.26	1576.56	160.437	237.8	1057.84	2251.71	3392.81	31.8032	154.67	102.11	719.369	1201.23	1282.91	588.171
K00930	3245.53	3144.33	3601.7	369.192	819.006	1163.16	1501.15	222.615	1481.7	1520.72	1296.79	1207.09	943.555	398.5	1855.8	1058.76	1316.94	667.79	852.236	601.16	157.679	2191.6	2303.68	5054.22	4004.6	3482.83	2183.46	2482.85	3193.32	824.332	4216.61	2307.21	106.311	275.318	1737.45	3824.58	1607.73	188.634	278.438	973.529	2635.1	3653.95	36.5383	231.789	142.827	942.979	1266.17	1354.17	769.454
K01953	3319.41	2862.83	4074.59	557.55	798.366	1156.23	1905.62	317.305	1416.63	1623.9	980.483	574.526	607.765	603.043	2214.78	1144.32	1349.57	771.281	148.124	597.558	287.626	1206.79	1826.94	3785.25	4068.88	3167.7	2095.69	3125.05	4180.68	1025.06	4348.15	1700.41	76.1583	273.924	1681.25	3984.51	1966.26	145.538	256.28	886.269	2009.54	3204.34	63.2487	181.635	204.336	973.209	1104.74	1200.83	695.239
K01696	3442.29	3647.05	3836.47	752.259	847.013	1259.14	1596.88	269.581	2663.4	2048.96	3300.04	578.111	834.358	680.714	2992.93	1464.86	1383.57	403.267	1065.69	712.956	258.311	2987.68	2111.88	1796.72	3598.25	3614.91	2510.55	2774.63	3029.49	992.15	4335.5	1812.55	73.119	233.158	1618.1	3743.82	1766.78	88.9144	168.64	502.244	2081.82	2452.65	63.6246	227.053	174.398	830.061	1245.51	1467.84	539.854
K03466	2768.16	2121.39	2592.75	572.638	705.279	1098.94	1803.28	391.252	2912.86	2336.37	1594.15	933.687	979.259	765.124	1364.21	873.299	1144.44	653.938	728.175	622.651	256.111	2716.49	1916.77	5215.34	2878.9	3080.32	2036.29	2567.94	4121.96	1090.37	3672.09	2012.68	65.8934	217.35	1645.67	3221.53	1382.07	130.472	217.716	1007.04	2189.12	3238.32	80.4528	596.067	341.874	1042.84	1069.31	1306.82	811.595
K00703	3238.06	2385.67	3481.88	365.256	835.413	1063.52	2401.05	418.783	2425.79	2377.49	877.576	635.944	600.853	366.516	2977.19	1329.2	885.794	538.323	115.094	657.444	215.642	1455.94	1553.23	3787.34	4761.85	2095.65	2157.76	2098.45	3953.7	1355.45	5581.3	2331.46	80.5572	293.007	1927.69	3797.06	2036.08	184.605	279.593	1105.43	1796.42	2945.57	60.1924	377.537	234.571	1098.08	1215.26	1519.05	723.121
K01424	3295.13	2026.65	1965.78	241.362	1090.23	615.87	2024.77	290.37	1586.98	1436.6	1114.6	1472.21	877.945	306.866	1281.92	860.201	730.306	880.532	179.164	790.878	229.775	3538.86	2234.08	4668.66	2565.99	2630.85	2439.11	1705.27	2238.77	1958.12	4550.19	2950.75	91.1519	216.531	2268.35	4619.12	1556.08	287.746	327.863	1150.49	2655.92	3427.12	72.8986	440.267	228.85	827.351	1452.51	1220.45	591.621
K01925	3227.66	2564.62	3219.48	422.366	704.139	901.404	2059.72	329.974	1788.44	1509.86	957.022	1245.6	1141.66	411.624	1522.42	819.373	1128.59	594.621	974.991	650.007	229.593	2829.37	2157.19	4147.23	3414.94	3588.9	2387.21	2663.08	2972.96	1257.9	4526.43	2416.86	70.4824	221.009	1677.73	3624.7	1561.2	179.879	271.466	977.298	2390	3300.52	57.1228	361.957	209.599	859.307	1047.7	1128.64	608.862
K00057	2822.48	3700.98	3759.91	429.223	847.681	1074.7	1604.83	271.924	1962.83	1681.65	1137.58	745.237	779.901	694.475	1623	826.094	1156.52	615.718	917.414	553.479	188.17	3251.57	2110.84	4283.36	2900.52	4288.91	2455.82	2732.88	2651.14	1103.01	4111.45	2034.97	78.6274	340.828	1919.01	4135.55	2024.45	115.525	245.686	708.558	2136.28	2742.39	64.5501	258.269	227.509	1131.04	1011.07	1205.69	543.376
K01890	2991.72	2947.87	3293.63	371.231	694.248	1077.92	2096.54	393.997	1973.01	1781.1	1113.79	926.098	961.91	364.4	1607.45	901.598	1057.72	670.288	1060	632.633	201.59	3029.91	2280.42	4080.83	3191.63	3637.16	2181.11	2192.47	2880.87	1304.22	4227.38	2116.83	77.8046	283.17	1818.78	4040.99	1896.79	168.835	270.577	943.22	2051.73	3223.5	60.3897	467.655	275.152	996.485	1152.94	1352.06	662.819
K00648	2680.74	2793.98	2797.55	160.998	579.719	915.069	1890.72	268.322	1863.93	1538.32	571.965	790.316	969.392	337.466	1165.17	589.547	591.179	540.1	1124.36	688.536	175.44	3090.04	2048.21	6743.07	3001.53	3449.86	2375.2	2651.51	3450.44	1672.36	4543.49	2381.09	59.5971	184.362	1883.68	3885.3	1147.42	198.856	346.139	1049.5	2458.51	2436.67	38.2621	310.508	182.133	734.604	1152.7	1120.83	583.443
K03218	3070.38	1799.85	2273.27	432.068	1061.83	1232.83	1851.99	281.199	2137.8	1751.84	1141.64	1082.27	1355.53	363.192	2087.51	1126.13	1193.14	874.104	903.273	875.328	345.123	3171.84	1925.56	6027.99	3259.37	2472.37	2080.39	1788.37	3328.81	1356.39	4939.14	2255.54	91.5403	200.951	1989.15	3348.07	1780.13	167.938	235.39	964.638	1707.96	3382.18	72.6537	689.965	358.989	1035.42	1342.5	1479.35	797.517
K00937	3347.42	2613.83	2488.56	346.426	669.717	903.09	1910.8	325.3	1097.03	1289.01	1053.02	714.186	737.622	394.835	2210.72	1039.97	791.468	480.178	985.989	555.49	87.1816	2412.34	2361.1	3542.75	3819.89	2621.24	1989.81	1795.2	3347.57	939.424	4978.42	2201.39	82.3693	276.167	2116.12	4557.61	2537.56	196.024	258.807	992.32	2131.3	3289.95	47.8855	117.67	148.369	852.624	1321.16	1513.11	614.606
K01733	3337.9	2883.49	3327.6	444.237	817.032	871.048	1998.42	370.368	1997.17	1880.4	1519.29	1026.3	636.052	508.164	1824.15	1093.74	1188.76	669.33	112.346	631.652	252.86	2883.56	2159.63	3729.45	3575.62	2573.97	2332.09	2471.44	2911.63	1091.71	4591.41	2216.16	96.7097	222.065	1856.89	3769.83	1902.32	142.604	250.834	967.477	2219.62	3107.38	51.0757	313.734	232.476	852.397	1079.42	1244.15	805.782
K02040	2843.73	1804.04	1963.38	298.732	1631.71	927.529	2239.44	372.527	2141.16	1862.2	910.453	811.575	763.091	627.697	1207.96	820.873	971.087	903.845	748.256	599.547	75.0645	2042.22	1768.97	6036.61	3912.83	2788.75	1752.35	1762.13	4036.79	851.151	4192.6	1877.82	73.2993	246.465	1624.49	3692.41	1654.05	240.132	278.136	1186.42	2189.86	4176.89	53.401	196.565	148.004	815.746	1316.89	1203.63	720.2
K00761	3314.74	2648.38	2724.95	435.68	951.257	1033.97	1711.18	338.231	2111.89	2010.77	1183.3	867.185	669.629	791.455	2037.03	1218.21	1070.49	656.235	135.253	587.35	151.806	3041.12	2210.85	3676.37	4125.25	2198.75	2127.57	2038.85	3738.14	988.037	4890.25	2347.49	76.543	267.158	1712.58	3353.61	1847.05	196.491	159.317	1013.51	2125.76	3725.33	94.965	575.713	288.831	885.618	1082.49	1348.43	681.186
K01588	3064.94	2866.71	3263.24	533.438	1060.59	1117.06	824.348	117.889	2171.97	1976.43	1243.51	1231.62	1153.34	853.283	1946.89	1037.46	1101.89	1133.41	824.915	834.475	377.563	2489	2000.26	5095.64	3599.33	3371.78	2466.23	2734.64	3366.45	568.893	4267.96	2132.56	77.5719	185.06	1654.71	3421.74	995.209	142.187	210.017	747.496	1933.71	3201.75	112.9	659.801	525.946	1490.6	1163.54	1344.26	697.19
K00645	2850.16	4004.92	3943.34	217.733	567.757	813.095	1560.6	232.686	1747.65	1482.01	796.184	1219.55	1079.24	346.212	1415.7	886.474	1137.23	691.325	877.135	633.356	199.72	2991.79	2094.88	3788.45	3246.98	3648.31	2647.97	2710.96	3482.26	1370.03	4251.22	2049.15	68.1802	250.894	1648.93	4136.68	1308.22	169.254	302.24	1051.66	2290.93	2471.28	71.1009	481.221	242.3	945.547	1044.84	1116.11	614.913
K03526	3415.05	2994.83	3263.99	400.956	848.071	1185.45	1690.06	261.408	1328.73	1430.17	1265.77	1068.98	1061.88	407.262	1966.81	1034.24	1238.47	662.098	960.319	580.862	288.359	2242.32	2072.01	4435.95	3606.64	3405.66	2558.43	2323.96	3129.76	933.982	4478.35	2196.46	87.6387	244.097	1599.24	3689.55	1927.54	161.193	272.951	976.198	2102.92	3304.58	66.168	591.017	265.99	1056.65	1169.71	1483.41	674.801
K03561	3615.07	3071.24	2921.6	74.6816	751.559	860.511	1873.55	118.213	195.516	204.959	522.367	2231.82	2070.56	53.8115	1478.69	853.404	560.532	335.524	3067.26	777.693	287.494	5505.66	4100.74	361.148	737.472	5313.65	3114.36	2101.13	791.546	2493.6	5621.49	3630.77	44.3984	152.585	2034.89	4780.27	1035.14	213.084	371.595	944.14	2819.33	1888.64	80.9051	741.869	251.374	493.56	1421.22	1039.24	265.699
K12573	3129.26	2381	3203.8	177.506	734.848	1009.87	1928.56	238.534	2213.06	1953.18	710.865	1219.01	1035.11	294.192	1336.92	822.209	994.653	629.081	1033.33	646.725	178.445	2737.44	2326.48	4859.74	3748.37	2726.48	2074.35	2114.99	3037.43	1541.34	4385.91	2352.57	77.2975	268.992	1813.86	3885.52	1750.94	213.424	351.739	1143.61	2194.14	3093.83	53.8377	321.934	214.719	910.402	1105.3	1234.06	723.087
K08483	2207.35	1231.45	2319.83	302.837	646.105	1289.08	2008.98	319.035	2475.45	2569.33	809.459	181.803	616.177	453.822	1821.65	920.664	1043.14	854.693	782.014	403.575	65.0258	3188.65	2207.9	10292	5557.11	1554.39	899.818	1651.08	4955.92	256.786	4230.42	1161.75	71.1551	281.143	1491.16	2324	1942.76	172.993	255.171	1338.63	1317.62	3828.47	68.2906	256.433	249.88	1302.25	918.748	1631.02	1047.35
K02029	1992.71	1980.03	1888.19	1036.65	231.311	1281.01	1251.15	423.808	2666.29	2415.22	1688.84	65.4094	277.039	957.516	2922.15	1236.03	1162.96	415.197	73.78	506.611	125.885	5012.22	2586.98	4645.83	4430.94	1727.24	1138.55	2820.91	4307.31	204.656	3931.41	1403.83	87.9032	207.445	1680.96	2385.33	1968.12	91.6039	176.301	691.388	1263.78	3792.97	42.144	542.857	231.523	1458.5	783.764	1565.09	882.934
K01854	3209.94	4788.83	6357.68	615.942	171.898	691.613	1523.11	394.803	1773.47	1561.01	1334.28	218.838	182.89	1087.34	1402.77	695.932	666.499	471.197	31.5355	291.293	91.2551	896.194	1473.75	3795.69	4811.12	1843.92	1787.48	2961.98	4804.43	319.019	4273.7	1255.92	86.529	382.446	1788.66	4654.68	3136.79	110.661	160.713	841.666	1871.87	3557.6	51.0419	411.221	99.3681	320.982	1029.06	1217.02	577.63
K00794	4074.5	4920.12	5268.57	315.71	703.583	702.408	1916.55	335.604	896.346	1058.35	845.622	1189.22	1101.06	209.599	693.919	523.418	993.899	441.822	895.486	599.17	464.515	2315.67	2561.47	1885.81	4151.93	3975.55	2960.29	2732.48	3411.57	1199.56	3826.65	1949.39	69.1213	248.503	1527.53	5000.28	1582.69	172.832	324.364	715.623	2377.74	2628.45	74.501	639.572	307.524	552.773	821.44	811.461	394.618
K00655	2763.81	2234.3	3094.55	279.692	621.679	911.336	1845.28	326.56	2278.7	1873.64	884.794	659.377	729.575	458.004	1157.54	638.01	1092.93	440.059	915.089	607.805	105.9	2857.03	2335.66	6343.69	5300.27	2521.39	1730.53	2212.99	4837.65	997.936	4212.03	1634.48	70.0944	208.762	1354.54	3462.61	1196.64	219.106	306.436	1318.35	2081.74	4147.19	55.4952	142.457	116.664	574.764	1044.32	1276.91	633.127
K01000	2922.88	3169.56	3383.35	316.036	748.585	1121.75	1172.14	243.294	1843.7	1884.53	934.043	1042.82	844.454	509.432	1454.37	740.02	1045.35	830.889	889.156	631.922	187.298	2626.58	1879.5	4053.82	3207.93	4018.54	2373.35	2959.58	2994.13	640.483	4154.6	2128.69	91.6392	253.729	1644.82	3787.98	1269.22	152.763	242.761	961.099	2357.36	2983.15	57.425	340.75	207.46	1116.82	1001.16	1363.27	667.417
K01534	3858.02	2214.56	2905.7	715.191	857.36	1248.45	1861.98	284.404	1405.09	1677.17	723.863	271.856	393.424	717.856	1291.5	624.01	1094.78	588.709	90.7609	529.108	163.217	3030.24	3041.47	5869.97	4559.41	2098.29	1690.42	1963.3	4170.05	442.798	6069.93	1629.61	70.0817	257.244	1562.41	3912.72	1873.55	147.856	247.646	815.53	1873.73	3666.62	37.121	431.501	216.72	1083.65	1089.4	1315.21	949.01
K00067	3215.09	2229.41	2278.94	340.684	406.922	1151.74	1760.48	271.136	2089.34	1788.49	1121.94	674.411	883.99	790.023	1018.41	563.338	704.016	1013.58	912.297	758.49	260.232	1014.66	1700.93	5992.14	4931.68	2373.57	1811.6	1880.03	3785.25	953.104	3912.96	2075.07	40.5955	207.034	1640.99	3794.04	1930.26	214.388	279.141	1336.27	1853.88	2934.2	28.8989	148.231	144.089	448.705	1684.96	1467.68	879.648
K03585	5127.59	2692.58	2036.72	29.9952	1098.11	388.339	1942.51	153.715	415.886	335.605	722.487	2783.93	1760.85	28.2403	1687.51	1177.42	422.245	488.631	1606.85	1177.8	283.341	1041.08	2381.01	292.977	375.427	4359.58	4191.67	1172.82	609.596	2493.36	5635.82	4790.94	32.536	29.6674	1996.5	4624.24	1225.91	342.053	405.897	1169.22	3560.27	2748.89	70.7581	614.985	240.536	385.351	2059.81	1400.04	393.33
K03525	2334.18	1415.16	2248.33	276.53	71.4611	1224.06	1757.12	288.685	1869.42	1904.3	812.344	661.772	791.914	810.429	1141.03	559.816	1136.54	1064.37	891.8	572.353	113.156	1416.32	2121.79	13800.8	4852.32	1802.87	1281.05	1358.31	4822.1	450.118	3774.85	1546.57	37.221	196.563	1316.02	2820.25	1638.4	241.093	294.017	1433.13	2178.69	3706.17	45.4857	133.807	147.691	1005.49	964.932	1324.6	865.174
K00014	3045.71	2801.21	2926.44	408.282	1318.54	925.027	2005.96	427.491	1818.4	1897.24	956.994	637.959	617.04	395.107	1142.75	685.69	783.905	617.23	690.31	541.819	93.5396	1545.46	1408.8	6903.15	4488.51	2394.26	1940.83	2262.54	4734.41	925.927	3850.15	2309.64	77.1836	215.019	1218.5	3243.24	1894.85	166.196	236.326	1159.98	2042.69	3690.39	28.099	97.1476	78.5635	694.992	1220.37	1319.52	704.092
K03470	2801.06	3252.05	3338	417.261	837.696	988.238	1699.55	237.7	1331.9	1249.99	995.31	929.237	914.686	358.602	1182.92	618.206	1060.64	590.758	1033.51	666.202	259.076	2600.83	2216.59	4992.01	2820.82	3761.43	2327.35	2790.94	3043.82	1059.1	3660.31	2189.76	83.1426	313.066	1837.37	4228.25	2012.53	152.558	340.328	927.177	2572.29	2946.59	51.0432	251.468	128.417	841.156	1080.32	1091.84	526.515
K03531	3254.71	3450.71	3970.39	543.27	821.867	1177.12	1400.06	207.164	1577.9	1568.34	1160.14	1063.67	1128.36	343.143	2167.75	1123.22	984.888	752.141	661.065	630.315	349.045	2453.41	2119.9	3929.49	3258.77	3719.99	2525.76	2386.22	2588.25	802.757	3857.23	1793.39	80.7267	259.049	1656.01	3601.36	1580.58	133.106	242.825	898.433	2036.35	3117.37	92.705	775.004	419.587	993.658	1225.64	1316.7	748.299
K02357	3167.16	3041.26	2983.61	254.214	580.379	790.537	2188.94	348.104	1831.01	1587.99	816.291	979.614	1259.33	475.175	1879.91	914.072	824.57	282.165	783.428	529.149	286.735	3072.88	1987.74	1839.24	3286.54	3573.16	2409.94	2154.64	2578.25	1659.27	5021.77	2454.73	58.4937	293.894	2056.28	4019.57	1826.72	156.978	268.398	970.125	2126.09	2847.35	56.8631	510.689	263.177	791.033	1059.48	1082.19	550.659
K03522	3559.82	4407.7	4356.69	274.734	953.677	725.601	1745.44	244.58	758.862	756.506	939.508	1634.94	1121.77	502.875	1428.1	964.477	1058.37	1062.81	244.422	849.079	401.027	2442.46	2176.82	1070.2	2858.7	4327.77	3565.68	2572.08	2188.15	1713.78	4490.39	2368.63	130.492	269.679	1592.42	4517.33	1518.72	125.848	285.1	772.62	2383.99	2135.46	92.8255	796.711	394.201	673.429	1117.66	1156.54	589.847
K03711	3508.38	2654.08	2822.25	227.059	375.92	573.117	2301.24	354.355	993.579	1062.95	1410.52	661.548	190.798	362.643	849.904	556.833	720.446	281.275	17.3895	505.419	16.4615	3584.44	2929.96	3680.1	4942.87	2233.4	2490.04	1698.34	3409.74	1293.85	4551.9	2665.57	101.099	196.5	1992.63	4453.1	1811.06	249.253	329.946	1150.25	2823.38	3937.84	36.1724	79.3244	58.9981	369.243	1032.54	813.115	436.913
K02335	2636.04	2208.18	2654.19	305.307	800.717	807.481	1847.44	333.999	2452.46	1943.95	976.951	1153.48	1043.89	792.654	1777.36	963.385	869.858	827.284	812.415	635.699	271.107	3255.45	2168.18	4539.91	3060.74	2598.08	2103.13	2215.86	3047.72	1235.05	4187.68	2164.52	71.5104	203.827	1640.89	3251.58	1394.28	157.76	266.768	1120.82	2032.17	2941.22	65.6051	573.945	277.947	889.315	1104.72	1314.68	597.469
K03439	2798.25	2490.57	3449.02	268.177	617.357	983.69	1802.84	344.894	1884.99	1475.83	939.979	791.307	728.445	427.194	1134.33	599.125	1047.57	356.965	626.004	562.819	114.834	2815.47	2576.81	4058.39	3957.1	3053.66	2014.8	2310.92	3737.82	841.634	3964.54	2004.67	89.9078	206.995	1717.3	3885.33	1703.49	170.076	300.774	1178.72	2371.9	4124.27	41.4305	239.624	166.471	792.517	954.647	954.695	581.276
K01356	2611.38	1588.2	3126.61	557.216	754.748	927.007	2038.31	476.065	1990.95	2254.25	850.965	82.1715	329.934	659.035	1918.04	925.265	1058.67	769.555	15.5222	466.72	81.1324	2582.89	1884.02	9068.2	5443.3	1265.84	1216.93	1695.81	4424.32	144.959	4477.17	957.127	130.617	248.151	1175.29	2361.16	1643.56	171.372	257.662	1312.89	1656.13	4548.12	40.8432	132.281	199.52	886.536	879.988	1348.34	795.361
K03574	1949.81	1653.44	2400.71	521.221	632.69	877.98	1423.2	419.321	4639.02	3275.21	1380.43	294.034	602.457	710.571	774.067	467.554	948.334	318.44	1211.7	320.517	0	5195.08	2173.39	3878.97	5393.87	1712.95	1281.93	2023.58	6586.21	175.311	3308.59	796.137	120.348	267.145	1979.95	2567.77	1907.32	117.814	144.477	882.344	1499.63	4052.75	29.0123	1567.85	156.158	426.292	807.838	795.109	603.563
K11754	2216.38	1644.16	1648.91	242.725	551.557	1109.73	1575.61	329.804	2863.2	2337.83	842.836	639.509	853.342	549.48	1220.04	666.117	1056.21	1079.1	693.77	582.453	144.631	3176.62	1808.88	10617.3	3457.2	1996.89	1338.55	1785	3913.72	799.38	3394.51	1738.82	56.1244	152.638	1519.96	2305.28	1301.26	201.106	280.148	1232.1	2018.88	3671.87	74.7844	337.554	286.043	1236.34	934.594	1293.01	866.949
K02895	2816.94	2779.08	3680.11	489.02	1042.62	888.062	1512.61	317.521	1713.94	1708.88	668.914	963.792	738.462	367.448	2749.88	1098.09	497.014	272.284	791.676	534.173	243.908	2793.38	2490.52	2641.93	3944.87	3409.85	2468.49	2016.01	3475.78	915.293	4928.59	2303.11	73.5635	283.409	2126.19	4096.42	1123.76	206.049	287.767	973.18	2049.6	3324.74	42.3036	150.361	112.155	760.975	982.391	1215.44	546.197
K02343	2869.4	2633.71	3062.06	511.127	1003.6	1073.27	1608.2	218.446	1826.06	1654.47	1207.37	998.76	1031.86	520.002	1318.01	829.78	1148.63	665.459	528.274	597.003	313.097	2767.75	2003.41	4039.87	3613.21	2718.43	2220.91	2406.43	3522.45	1072.9	4070.05	1920.65	75.8202	245.117	1734.28	3362.56	1748.79	128.519	232.961	923.57	2382.58	3321.24	76.3908	568.179	296.372	997.065	1044.79	1265.94	739.3
K02864	2925.25	2305.36	2501.14	190.61	818.17	818.044	1998.53	253.524	1736.08	1744.69	811.526	828.656	935.224	588.305	1195.08	564.616	761.173	215.806	946.516	475.456	131.353	3516.02	2141.12	1931.34	3513.95	2724.19	1972.43	2465.12	3327.73	1157.62	4701.18	2561.94	82.5917	231.875	1840.8	4139.16	1704.68	197.812	249.385	1084.65	2287.02	3312.16	66.7264	405.24	234.606	968.127	843.016	973.207	543.175
K06925	2955.36	2284.96	2723.16	434.979	931.031	983.223	1689.38	245.754	1853.9	1759.55	946.564	1048.63	941.275	577.4	1455.84	775.227	979.806	630.8	812.465	603.042	232.617	2629.62	1950.12	5165.98	4004.81	2162.64	2086.88	2341.09	3718.49	987.255	4775.91	2124.78	102.219	220.695	1631.43	3450.59	1714.97	157.289	233.191	1054.46	2142.04	3175.74	60.4729	228.279	150.297	720.594	1220.78	1411.74	845.531
K05601	2914.25	3112.32	3859.66	508.967	1202.65	1089.05	1655.55	255.711	1319.03	1577.62	1012.85	366.089	395.28	464.643	1766.85	835.926	1408.97	497.728	99.6159	545.864	176.504	2279.39	2305.9	8448.53	4840.17	3080.53	2310.76	1905.29	3654.99	450.279	4215.35	1348.22	100.066	311.335	1733.33	3991.19	1920.44	140.747	247.178	787.985	1800.34	2752.34	42.8723	216.778	123.469	807.001	904.802	1079.5	795.582
K02945	3768.49	4603.51	4272.48	383.505	586.822	550.106	1858.62	368.647	1242.99	1093.7	1126.51	1080.56	1044.97	316.505	1535.25	760.803	756.595	322.065	727.26	574.48	220.759	1565.83	1548.83	967.746	3293.6	4587.69	3026.91	2510.53	2267.82	1447.08	5147.11	2581.67	48.6117	196.289	1679.62	4386.59	1696.97	127.342	280.587	823.922	2542.92	2840.51	76.2631	598.69	268.518	570.813	964.991	1021.54	377.99
K03696	2591.52	2197.68	2447.82	619.714	246.319	1165.35	1523.21	292.169	2244.23	1937.66	1016.76	751.112	1017.1	566.789	2040.19	1051.38	954.294	759.865	848.93	626.088	282.823	2453.96	1790.53	7067.48	3114.96	2519.61	1909.71	1998.81	3283.33	1028.61	4168.77	1959.16	49.5601	170.363	1429.64	3136.03	1553.87	117.871	241.967	842.976	1873.23	2849.01	68.5442	852.264	302.633	1115.73	1079.54	1324.02	867.137
K10823	2412.88	1794.82	2218.25	779.062	1139.1	1929.92	2154.53	391.943	2728.94	2295.41	688.11	145.748	538.602	411.966	1068.87	547.019	1042.57	1053.08	182.076	478.874	92.1044	3478.86	1778.96	6458.03	5008.94	1496.94	1021.14	1490.3	4483.62	119.253	3069.6	1017.47	129.78	435.488	2295.15	3557.71	2901.99	121.373	170.144	872.497	1093.69	3503.3	72.5886	860.485	429.188	1274.95	780.112	985.287	949.864
K03292	3224.55	1931.07	2721.71	501.311	820.373	842.909	2742.36	453.799	1111.21	1262.52	954.355	149.484	234.334	341.769	1692.89	827.272	510.162	145.757	37.9743	471.626	34.2065	2500.5	1603.65	2525.66	6987.67	1640.95	1917.36	1617.14	4466.4	523.057	6227.95	1650.52	212.181	574.113	2846.95	5073.59	3194.59	161.619	284.715	1101.88	1302.89	3697.58	28.9333	61.064	102.225	490.591	1169.65	1307.27	644.162
K04758	3397.38	2130.78	3012.03	1005.3	880.084	1585.96	245.898	97.745	1881.25	2175.79	1045.95	499.999	916.743	630.489	2980.03	1373.55	1192.65	546.57	1183.25	397.394	296.978	2043.1	1530.77	4026.03	5374.94	1827.51	1447.26	1607.82	4403.05	53.6707	5261.93	1525.64	69.9811	264.317	1505.66	3118.68	387.271	144.801	175.526	1094.9	1408.63	3943.82	73.0523	560.739	252.822	930.569	1375.56	1968.89	1038.37
K01754	2940.99	2583.68	2878.28	535.438	1413.05	1362.67	1960.69	348.062	2213.14	2102.61	1181.17	353.059	626.8	437.821	2134.55	1051.46	1035.77	452.61	843.565	482.986	150.66	3385.41	2021.99	4615.8	4259.43	2638.47	1789.33	1959.85	3260.14	310.482	3844.11	1229.38	98.5932	319.519	1780.24	2829.58	2040.57	119.608	201.01	818.49	1666.83	3343.07	44.4985	498.142	175.47	949.993	1057.03	1534.38	611.223
K05592	3105.08	2720.33	3125.84	288.058	745.439	956.213	1930.75	261.551	2022.94	1514.98	925.237	1170.17	896.341	176.704	992.777	673.605	904.118	538.549	951.553	653.906	224.549	2957.63	2332.57	3651.47	3571.18	2944.18	2233.03	2289.61	3288.97	1319.77	3668.52	1881.21	82.0731	289.875	1805.04	3837.74	1729.18	175.51	275.404	996.029	1965.94	2784.27	33.832	112.81	117.161	452.929	1040.69	1068.4	489.741
K01442	4112.77	2631.01	2677.74	660.718	189.686	528.65	2088.47	343.737	759.519	1084.85	1006.86	1000.79	948.289	825.51	2107.65	1000.97	633.671	203.146	128.538	422.609	209.274	840.242	1563.08	1193.49	5329.4	2025.5	3120.46	1848.85	3633.21	1468.2	5518.51	2643.28	10.7696	70.7387	1498.59	3647.1	1338.88	159.382	233.241	874.049	2359	2821.07	26.9283	1233.16	177.085	473.212	1299.45	1405.88	856.721
K06173	2023.86	1461.09	2020.45	417.734	588.262	925.936	1785.41	407.558	2590.39	1917.69	1009.53	1064.56	964.337	615.475	1541.27	747.287	879.064	739.753	1046.79	582.439	137.552	2878.83	1857.32	8054.01	3643	2247.87	1494.51	1924.3	5009.8	673.577	3760.14	1730.16	48.052	166.095	1287.41	2086.49	1351.26	172.377	208.765	1046.84	1835.7	3320.86	65.1209	212.876	147.885	782.224	946.034	1364.49	763.079
K03521	3497.7	4934.46	4425.29	225.525	708.415	474.733	1754.07	247.696	655.877	744.089	922.252	1456.41	1025.91	432.057	1185.78	858.581	1202.66	747.939	275.397	774.941	372.202	1751.94	1935	948.369	3048.94	4565.95	3490.25	2876.48	2122.02	1494.69	4007.97	2034.91	62.2064	262.13	1377.64	4726.87	1607.93	123.798	270.156	733.539	2361.01	2089.57	43.565	557.201	233.959	485.094	1129.17	984.773	441.168
K00812	3786.36	4817.21	4833.25	160.136	62.2916	292.169	1583.47	121.904	186.39	185.318	534.4	1295.39	731.13	62.6181	994.273	776.108	752.459	278.479	817.097	525.408	176.061	1659.25	2567.07	459.643	1709.01	5631.89	3672.13	2801.98	693.678	2411.9	4818.16	2977.79	26.6623	194.267	1744.07	5581.56	1380.62	161.462	374.014	705.515	3000.48	1852.32	58.7607	406.198	152.351	438.021	1152.71	719.784	192.484
K04078	3370.33	3644.26	3940.39	484.545	746.155	732.345	1227.06	224.183	1600.81	1347.99	1179.25	1001.45	1105.4	385.977	1649.19	903.312	676.013	265.283	754.526	422.176	269.339	2382.45	1631.99	1710	3442.13	3355.15	2765.91	2341.23	2813.58	928.126	4173.13	2376.15	112.123	296.219	1791.68	4158.13	962.391	128.725	342.986	819.089	1796.57	2984.24	71.3024	829.922	306.099	817.981	978.946	1110.91	763.138
K03076	2910.53	4525.05	4011.29	337.714	696.196	422.76	1625.48	282.049	1477	1148.29	737.504	782.985	875.168	739.851	1012.8	578.153	578.458	164.548	761.946	469.591	224.661	3347.41	2223.88	967.689	2989.59	4127.73	3036.63	2731.79	2476.28	1184.67	4139.59	2181.1	52.0855	213.794	1771.08	4303.81	1582.23	80.8955	285.39	569.768	2288.32	2217.31	55.8614	549.481	192.027	482.562	609.597	695.22	369.294
K15583	2147	1682.5	2137.61	502.046	978.102	1963.67	2032.35	351.047	2612.79	2178.58	639.613	247.647	734.345	478.758	1125.99	673.808	1157.19	887.781	1002.13	412.651	66.2671	3784.72	1842.36	6384.63	4372.16	1839.95	904.057	1529.84	4448.16	145.278	3081.55	835.822	140.681	388.596	2174.65	3523.79	3136.46	92.6371	177.356	767.286	1164.03	3454.56	59.1051	709.05	272.981	759.813	821.802	1038.42	709.428
K04066	2378.3	1979.44	2396.61	331.922	890.122	1076.66	1738.43	301.073	2014.01	1742.98	949.638	1037.32	867.063	373.725	1324.41	812.786	960.62	757.174	942.191	632.648	175.939	3343.59	1947.24	5336.57	2301.35	2816.04	1786.28	1959.95	3164.94	973.898	3408.47	1797	72.563	216.782	1572.97	3249.76	1517.32	175.436	260.703	992.422	2198.42	3216.06	75.567	340.992	248.369	1096.89	1067	1223.58	505.575
K00099	2811.9	2464.45	2959.79	328.662	890.749	1066.66	1720.92	254.267	1126.93	1284.06	972.324	895.191	872.356	684.444	1244.31	769.149	1132.33	568.331	948.898	601.339	229.719	2161.33	2119.95	3936.18	3080.37	3223	2264.81	2168.17	2842.14	913.48	3799.83	1909.2	102.863	237.251	1613.21	3745.36	1590.42	147.774	263.753	856.918	2091.9	3216.1	53.5151	348.678	283.937	1180.21	1177.81	1318.87	614.53
K02316	2643.07	2158.91	2386.78	372.068	798.275	884.664	2007.96	317.339	1769.55	1559.91	950.405	935.957	845.796	317.114	1479.93	878.136	872.597	558.712	763.252	564.85	210.566	3099.6	1935.09	4346.15	3627.44	2453.13	1930.07	1929.94	3094.98	1032.02	4105.66	1953.55	75.5415	236.712	1711.46	3143.45	1695.81	129.601	235.267	916.911	1951.59	2928.04	48.4441	419.404	220.843	858.214	1020.78	1197.16	564.698
K03284	3456.13	4214.69	4300.77	140.702	767.765	397.458	1447.96	220.783	1278.04	1127.69	677.247	973.07	940.211	255.428	1108.7	630.839	610.332	200.551	1039.96	661.926	166.944	3360.39	2357.99	690.159	2680.44	4591.99	2870.15	2192.15	1988.96	1355.36	4359.89	2221.68	74.6253	208.449	1663.8	4603.87	1503.21	168.82	245.2	721.155	2500.66	2043.43	75.0176	498.236	169.025	597.167	1018.4	860.193	350.316
K09955	4311.82	3862.26	3185.9	123.214	872.305	208.921	1234.31	165.509	447.414	254.157	1100.88	1060.53	372.12	143.033	1347.61	982.017	831.696	465.512	70.7149	510.233	29.2312	0	2730.89	884.842	1357.1	4354.21	3389.42	1673.29	687.351	1309.62	4116.24	2263.83	49.4444	161.426	1753.32	3817.22	1511.88	197.41	481.207	782.897	3639.7	2432.46	44.5664	76.7351	38.7759	184.678	1250.4	958.774	156.097
K03617	3396.45	3285.67	3656.9	240.218	599.988	736.399	1760.68	203.21	1201.25	1610.46	649.893	676.516	620.158	452.345	1096.77	602.968	1013.57	825.364	105.987	494.7	219.399	574.018	1518.88	4405.68	3910.3	2542.03	2368.86	2216.13	2728.95	998.025	4662.83	2040.57	62.0286	265.828	1756.92	4295.68	1683.44	139.179	321.014	902.98	2083.92	3163.01	37.7587	454.638	204.404	686.485	729.601	900.866	614.151
K01783	2623.22	1560.02	2179.69	220.749	796.085	762.782	1783.08	294.668	2196.94	1962.75	1254.63	867.703	970.767	399.61	1289.7	735.919	1004.37	612.375	898.115	605.149	135.338	3348.27	1813.96	5865.91	3102.96	2171.03	1692.44	1930.45	3126.28	976.588	4302.42	2035.56	80.2435	178.709	1348.59	2877.63	1312.2	148.612	224.454	1120.88	1852.27	3358.06	31.0974	285.313	196.824	928.266	949.681	1260.66	736.676
K01443	2699.39	1787.81	2096.33	344.498	690.244	854.059	2022.83	283.336	1773.57	1346.81	1218.12	736.54	733.828	406.747	1083.02	639.951	750.312	618.394	881.497	563.302	58.4768	1923.51	1570.52	4394.2	3281.82	2459.28	1930.01	1829.16	3762.64	1184.13	4372.69	1828.35	37.4384	133.889	1901.12	3836.48	1612.08	248.516	263.347	1154.69	2381.01	3694.43	30.2497	64.1572	108.979	380.48	1461.42	1245.32	487.683
K07566	2401.21	2011.41	2274.57	398.27	776.743	1116.8	1769.98	300.517	1835.01	1712.14	1655.21	853.657	921.103	403.325	1035.34	655.327	763.188	633.8	921.282	649.148	208.107	2465.11	1784.14	5573.1	3162.65	2324.44	1729.7	2293.44	3705.52	1022.36	3930	1890.15	65.434	194.183	1775.56	3122.36	1699.18	155.871	244.857	939.546	1849.31	2855.79	62.0486	249.27	208.124	954.482	949.69	1151.23	707.547
K03431	1959.41	1566.08	2038.35	581.75	741.646	942.344	1865.57	400.026	2073.16	2160.49	954.649	98.2723	295.213	580.58	1489.62	685.944	1011.41	698.508	56.0817	370.149	153.848	2951.39	2078.39	4920.12	4878.76	1274.61	1430.01	1846.19	4324.31	175.972	3838.49	1072.93	179.935	461.266	2590.83	4261.23	3081.94	211.778	293.545	1238.37	1615.14	3998.79	72.1778	269.109	224.124	899.963	1027.3	1297.6	873.712
K12410	2799.5	2137.08	2655.11	526.877	494.774	884.579	1374.65	187.199	1716.52	1663.3	1080.26	794.964	771.27	412.497	1619.35	820.63	988.207	569.412	101.626	618.022	173.576	1211.68	1408.31	4770.76	3756.79	2031.61	2055.15	2328.17	3815.25	1033.49	3993.16	2123.06	76.7676	190.301	1592.88	3129.3	1461.81	146.099	293.409	1013.78	2328.28	3481.36	89.2247	401.109	216.54	1037.91	1116.85	1161.55	655.391
K11189	2170.4	1243.58	2696.2	915.824	628.724	1620.68	527.684	178.1	2516.57	2658.53	879.083	227.874	496.929	1334.07	2557.33	1127.19	951.092	556.83	525.203	485.086	283.073	1457.43	1448.31	4115.61	6066.02	1388.68	1369.66	1988.25	5514.3	152.275	4678.03	1507.44	90.907	250.538	1240.64	2382.32	463.883	91.0237	159.503	1067.02	1377.32	3461.73	40.0678	1112.07	272.257	1475.9	954.953	1826.11	1147.05
K03595	3255.31	4980	4060.35	219.251	842.78	410.335	1661.91	269.953	1369.01	1187.45	930.396	784.276	624.916	499.396	1604.25	777.846	556.975	277.8	82.0046	541.983	263.545	3215.16	1918.08	893.051	3173.5	3023.96	2869.15	2305.99	2213.21	1131.08	4283.86	2190.17	64.1969	238.085	1633.71	4017.76	1797.06	117.073	257.583	701.841	2478.94	2316.19	43.7979	378.531	143.164	548.568	793.006	866.214	383.896
K00806	2457.61	3656.5	3550.12	264.15	793.138	798.534	1312.96	250.232	1799.67	1519.46	924.331	979.758	804.039	501.857	1454.9	774.316	819.496	481.24	785.842	532.983	241.557	3032.97	1883.99	2793.04	3033.67	3509.47	2392.4	2670.91	2814.17	800.518	3550.07	1744.66	80.8143	241.292	1636.11	3621.9	1136.82	151.295	263.084	847.542	2232.83	2544.68	41.9058	402.576	214.455	890.443	761.442	973.948	528.898
K01142	2807.22	2558.01	2517.11	400.338	708.866	1030.98	1780.03	282.144	1998.87	1659.68	941.054	690.562	855.781	384.845	1371.49	744.762	822.082	438.731	936.582	448.237	130.68	3451.57	2020.87	3803.09	3478.44	2655.95	1788.13	2061.25	3603.12	532.355	3433.04	1800.99	80.1477	279.307	1827.69	3227.86	1914.97	138.254	232.961	974.106	1943.77	3403.95	29.0686	193.762	190.924	644.535	946.226	1069.57	553.99
K02990	3151.66	2957.48	2932.9	315.566	660.083	658.347	1381.27	290.254	1816.95	1533.89	770.03	909.076	1158.89	573.167	1700.54	859.814	657.621	246.073	862.771	578.874	258.166	2778.03	1919.62	1525.52	3400.52	2454.67	2315.55	2358.88	3357.86	990.259	4733.37	2336.42	82.7803	196.608	2105.6	3573.92	1271.27	128.846	209.193	927.045	2181.57	3237.34	71.8048	514.23	186.5	518.941	687.959	954.653	453.993
K03685	2233.14	2650.52	2925.47	339.37	732.747	937.606	1497.03	320.172	1861.82	1507.07	872.213	496.024	701.369	407.343	1985.98	989.88	899.331	447.816	712.47	513.126	142.188	2998.95	2022.22	4609.72	3095.18	2939.62	2173.44	2029.98	2919.5	959.089	3443.76	1683.83	93.8897	274.737	1761.75	3523.06	1626.18	160.166	230.883	940.659	2301.93	2963.74	52.7844	279.608	209.404	979.892	858.903	898.635	419.479
K02959	3126.45	3169.17	3831.78	602.771	1074.9	1208.84	860.758	171.494	1797.58	1446.19	1094.26	806.663	861.148	423.853	2182.9	1052.8	1000.99	355.303	646.114	500.735	240.271	2524.64	1850.27	2534.1	4145.22	2822.71	2237.26	2279.79	2902.22	536.706	3864.69	1926.46	71.2042	273.294	1783.6	3429.94	1063.41	110.223	264.655	794.069	1824.36	2699.41	89.079	888.224	320.854	1047.36	945.465	1241.92	835.265
K07444	2980.42	3344.96	3779.65	269.338	150.195	829.99	1489.47	244.098	1953.21	1736.42	759.474	616.508	400.632	441.237	1092.61	620.406	1017.19	573.91	48.789	537.472	122.98	945.841	1726.02	4502.32	3792.51	3091.24	2288.67	2414.53	3218.16	766.348	4051.6	1856.21	29.7452	252.18	1656.36	4048.48	1749.2	181.865	274.823	789.871	2271.95	2713.99	24.7439	172.141	110.441	718.672	978.177	998.485	679.59
K07497	664.575	2575.16	545.901	312.219	13753.1	73.1225	3257.02	481.8	2612.3	1350.1	1145.78	1116.19	454.304	493.189	1483.72	1251.34	625.792	177.64	114.194	1320.97	187.716	11924.3	1491.73	738.177	2279.73	491.445	933.545	1024.73	928.415	1901.89	4348.95	1771.15	539.017	451.704	1794.95	406.503	1054.72	66.8154	87.2447	200.915	1904.97	2924.19	27.9047	40.2341	53.2468	68.2392	538.931	516.064	185.147
K03177	2246.73	1531.06	2176.62	282.944	714.182	755.908	1772.8	341.49	1804.9	1657.69	1006.94	1065.6	1014.85	363.645	1234.52	795.401	981.039	765.661	727.459	626.466	218.417	2431.41	1676.44	6314.16	2755.57	2569.75	2053.36	1870.12	2982.77	945.85	4311.79	1948.5	47.1058	190.701	1566.47	2769.63	1066.04	153.159	255.826	1003.01	2050.32	3206.52	83.7275	461.972	250.988	891.473	1171.05	1267.11	629
K01950	2710.57	1993.68	2654.58	377.725	255.375	1192.85	1734.53	333.041	1736.57	1674.04	989.238	1100.66	1113.25	529.934	1710.92	976.241	1034.52	819.938	1072.65	570.584	288.892	135.505	1154.63	6330.53	2943.36	2512.73	1973.62	1837.65	3878.72	1151.36	3588	2172.42	48.9531	199.398	1200.77	2965.84	1370.31	139.536	235.573	1128.47	2076.19	3092.06	83.8072	473.996	301.233	1247.97	1006.36	1211.87	846.226
K00560	3412.14	2251.57	2069.82	524.749	720.258	784.274	1803.33	352.969	1393.98	1183.79	1288.04	1341.84	837.294	583.366	1332.02	1028.66	626.622	521.919	954.047	726.451	316.416	3449.69	1688.58	1191.84	2764.62	2380.81	2238.83	1805.37	2486.44	1604.84	4812.18	2570.57	52.3338	100.274	1821.73	3890.52	1655.34	96.0231	165.293	599.071	2220.45	3214.58	63.7043	626.867	247.612	547.268	1180.2	1097.97	672.162
K02838	2700.18	1935.69	2128.06	255.129	569.662	687.488	1651.7	268.182	1759.69	1673.29	888.206	1150.4	1096.93	333.073	1765.2	946.024	722.768	760.956	719.673	643.837	330.302	3145.37	1925.32	3027.28	3105.58	2379.75	2105.04	1785.09	2714.39	1415.22	4804.17	2679.88	72.3184	207.581	1688.91	3216.88	1728.37	156.722	139.444	942.524	1820.51	2651.34	79.7508	670.565	260.745	1027.05	1006.29	1217.6	580.401
K07391	2549.57	2396.89	2808.35	251.451	745.766	989.606	1507.41	243.545	1158.58	1217.25	942.511	1423.87	1062.15	479.3	1340.9	773.431	1133.66	739.791	952.173	610.495	207.002	2147.58	1853.49	7249.81	2305.41	3057.14	2011.15	2454.8	2885.52	865.332	3227.95	1891.01	56.8789	212.378	1354.03	2817.11	1052.87	130.005	259.209	1009.35	2297.97	2812.39	46.3222	354.72	212.709	980.323	955.953	1122.74	606.516
K03502	2433.13	1657.54	2239.98	917.965	1194.31	1551.91	2252.92	511.262	2669.05	2378.72	1538.26	129.65	264.365	890.302	1726.93	901.61	1024.38	169.65	48.0928	413.518	158.947	6665.16	1871.95	2418.59	3931.61	995.605	1022.02	1589.87	3405.73	331.913	3595.38	1213.79	125.632	305.85	2363.26	3251.12	2294.93	185.917	269.64	1271.67	1364.02	4181.05	54.9593	264.192	318.566	710.602	946.265	1219.62	946.866
K07713	4940.25	2745.16	2174	40.2797	931.849	341.943	2516.25	189.685	288.793	323.28	1362.5	3148.1	1375.35	280.21	2155.38	1659.49	453.823	1579.29	334.642	1217.92	370.391	759.269	1222.03	223.178	909.572	2486.77	2669.09	3406.71	1554.68	2926.69	3943.74	3443.76	30.4523	16.3528	1227.06	3927.75	920.415	168.844	213.304	980.127	2817.82	1691.21	91.6376	480.144	217.585	708.625	1342.67	943.822	602.631
K07483	1804.41	2659.19	1009.06	373.66	9396.34	121.634	2105.83	328.554	779.635	540.478	806.719	1026.02	1028.43	365.492	746.254	703.069	456.203	62.5341	162.337	490.391	103.967	13269.8	1343.85	2042.2	5331.9	1070.72	1067.45	1785.24	1992.93	580.027	2438.23	1825.77	394.025	499.528	1714.15	1476.67	2080.19	26.3244	72.4042	487.783	805.396	2816.39	53.7663	178.711	110.181	323.652	863.433	894.794	177.125
K02902	3302.03	4434.33	4841.6	625.367	621.36	693.857	483.602	77.06	1134.43	1092.91	826.507	670.221	851.427	541.076	2016.88	1015.81	797.544	308.212	502.756	491.449	139.114	2145.28	1689.62	1735.37	3554.14	3016.5	2761.64	2505.67	2264.01	553.757	3897.82	2285.46	79.2327	371.187	2109.01	4281.08	436.493	132.115	332.106	851.675	2003.56	2823.72	72.1141	1652.15	236.045	711.359	756.933	852.955	592.342
K01448	2452.74	2027.09	2414.89	258.297	1711.87	731.759	2556.75	348.056	1399.97	1287.54	655.895	1074.23	832.628	566.28	1960.87	1083.68	943.009	216.275	1109.21	896.337	318.957	3860.94	1722.29	379.657	2753.72	2681.35	2157.8	2024.97	4649.99	1558.82	4612.5	2455.02	91.8812	126.269	1566.93	3553.41	1188.92	150.368	152.054	789.871	1938.61	1861.11	54.5335	831.995	61.5769	653.592	1324.65	1543.78	445.509
K04079	3540.51	3268.59	3638.3	279.575	803.708	868.051	2354.55	323.199	1053.1	1211.84	635.902	695.512	767.662	797.537	2179.36	972.232	722.264	320.553	850.644	510.516	197.899	792.891	1484.44	1691.55	3811.03	2841.39	2389.58	1882.71	2502.99	1213.46	4624.3	2126.19	97.4356	268.964	1711.53	4507	1711.1	184.262	272.806	805.159	1728.93	2380.26	34.2025	417.825	186.75	632.45	1072.47	1118.65	537.602
K03524	2123.55	1243.55	1684.35	347.346	609.899	1165.39	1326.03	199.287	2180.83	1980.83	811.995	554.444	666.057	414.051	821.144	415.451	970.734	1043.18	867.499	471.661	92.0112	2946.4	1763.81	9238.1	3624.88	1834.4	1151.75	1518.55	4612.94	416.893	2977.13	1514.92	76.464	191.033	1519.83	2277.16	1118.42	136.156	217.465	1028.72	1980.6	3856.83	33.8195	138.555	196.734	1093.43	855.506	1181.19	737.95
K02118	3527.71	2226.76	1931.75	860.184	1320.19	1117.66	1620.89	298.183	1550.41	1786.05	1341.87	969.409	1718.79	672.896	2808.77	1309.4	897.846	610.375	339.862	904.576	657.314	525.656	886.538	932.419	2854.51	1959.79	2134.73	1149.72	1526.43	1853.55	5268.86	2607.03	29.8207	93.9648	1519.51	3244.75	1660.5	119.328	182.499	613.006	2222.35	2843.45	98.5427	2442.11	551.543	1004.09	1317.55	1622.06	1204.39
K00147	2400.16	1925.16	2210.32	372.017	892.993	958.946	1513.81	294.53	2092.9	1770.17	963.609	950.759	923.881	503.674	1741.1	969.007	1037.79	1090.27	627.361	575.727	222.678	3018.45	1903.99	5755.77	2737.35	2311.42	1705.63	2091.18	2838.56	537.11	3239.63	1722.89	76.6226	153.884	1407.67	2500.18	1343.32	153.762	226.132	912.909	1932.48	2822.93	47.5922	171.41	159.462	886.185	1138.47	1316.09	715.939
K03783	3165.15	4375.36	4091.31	182.523	47.8743	832.797	1177.62	172.763	1362.88	1332.25	620.874	802.178	584.292	220.675	1095.18	688.751	676.93	414.918	102.27	589.5	155.65	732.243	1504.45	2053.26	2844.59	3261.4	2766.79	2432.9	3371.2	1408.78	4395.6	2183.24	38.729	262.165	1762.43	4657.69	1436.57	173.27	330.74	935.854	2380.51	2705.23	40.0866	375.059	170.765	880.833	709.934	801.439	603.305
K01736	2183.55	1548.12	2165.69	339.112	645.818	952.297	1331.37	195.299	1853.62	1635.35	856.425	872.143	781.23	356.643	1757.24	897.356	1038.65	821.033	727.652	552.562	178.972	2683.77	1905.16	8955.75	2978.21	2149.74	1540.22	2129.69	3237.7	670.55	3360.46	1892.25	72.1773	224.105	1347.75	2616.54	1078.6	157.085	223.823	914.472	1687.42	2748.13	43.4137	120.769	140.857	979.925	1060.53	1131.23	570.994
K00604	2213.39	2130.72	2542.3	258.563	775.044	910.236	1682.41	269.648	1869.57	1534.64	2327.08	778.228	963.665	436.934	1045.05	646.486	905.355	598.422	1112.9	610.095	159.086	3068.13	1889.41	4660.36	2711.67	2788.81	1745.29	1972.31	2941.96	1018.11	3516.83	1755.17	63.6993	180.072	1473.49	2986.29	1357.44	161.671	263.413	976.828	2093.55	2790.15	47.5642	283.603	176.657	952.042	987.459	1162.87	594.812
K00024	3780.26	3916.36	3988.55	66.6394	672.72	431.88	1635.93	146.964	161.519	259.357	745.358	1967.84	1427.84	71.3233	1029.36	759.797	776.052	397.679	926.914	726.511	284.408	779.166	1743.9	505.151	998.318	5034.54	3542.48	2233.19	791.306	2460.63	4086.4	3144.49	51.3715	170.507	1531.97	4614.38	1260.75	169.831	380.767	979.327	3051.8	1721.98	78.5706	702.636	278.335	548.333	1002.79	669.831	302.556
K00240	2729.67	3654.19	4414.61	95.6981	606.325	426.491	1168.8	125.709	214.213	166.356	795.461	1330.32	1177.49	242.077	871.94	627.634	932.954	263.739	922.858	558.44	154.723	2699.26	2909.77	1618.02	1771.18	6368.26	2983.76	3088.24	1236.91	1332.13	3947.49	1906.9	59.3267	233.245	1400.74	4018.93	1102.23	134.944	254.756	634.631	2510.34	2035.01	57.1782	541.129	203.383	589.346	796.214	693.753	314.001
K07462	2390.11	2656.04	3108.16	121.648	764.093	707.805	1673.55	202.833	1577.08	1368.08	1170.07	1088.82	975.618	330.291	1001.86	693.668	930.383	703.805	943.924	680.465	239.227	2747.26	2056.31	4284.78	2924.1	3259.55	2287.98	2046.24	2508.58	1591.9	3768.51	2136	80.7266	218.456	1500.21	3438.3	1230.04	150.475	308.027	948.592	1838.96	1875.26	67.7994	593.935	245.915	751.196	880.278	891.484	571.865
K04488	2703.93	2224.57	2473.75	779.265	1307.3	1400.01	1625.46	289.891	2108.35	2019.22	1350.88	200.512	474.349	555.194	1939.25	1051.01	1103.72	385.284	150.35	444.199	163.446	2477.83	1618.11	3939.67	4948.78	1197.36	1296.62	1895.6	4617.39	159.756	4089.11	1062.71	135.294	340.493	1886.54	3233.33	2412.78	141.625	162.22	786.024	1171.52	3237.38	58.9067	131.165	137.754	761.97	838.348	1191.03	803.658
K01129	2496.22	1850.85	2138.39	501.229	936.765	1072.89	1883.39	288.286	1270.05	1415.3	1002.42	859.991	643.037	518.704	1423.62	796.755	954.931	636.468	819.831	643.735	114.551	2184.13	2068.12	4587.76	3222.62	2345.3	1793.4	2061.69	3129.19	855.66	3728.63	2037.52	80.9118	229.489	1463.24	2924.43	1503.48	173.124	241.225	845.862	1941.46	2915.57	39.0414	393.086	148.03	980.394	996.252	1272.02	608.595
K01465	2254.53	1469.25	2144.43	428.843	513.109	1446.32	1685.11	256.828	1920.85	1864.44	893.53	1036.38	1182.73	597.718	1487.17	829.048	1049.81	686.049	1891.68	619.55	136.46	3058.61	1998.28	4740	3039.85	2832.73	1386.07	1543.88	3453.85	671.802	3167.92	1506.5	72.5755	186.459	1419.62	2641.9	1663.4	127.965	212.169	925.008	1654.19	3058.56	52.3547	219.378	150.422	905.026	1070.21	1385.69	607.813
K03613	2967.74	2127.43	2471.23	282.684	618.017	879.619	1843.53	224.804	1322.24	1729.28	657.811	821.774	737.071	595.576	1149.37	585.008	878.246	924.901	139.947	581.214	234.415	475.735	1425.7	5099.88	3922.1	1897.45	1910.46	1752.79	3006.69	1257.18	4742.9	2329.66	79.7378	191.544	1553.22	3434.51	1457.79	132.019	282.135	1172.4	1811.05	2948.32	56.7564	407.735	326.705	756.035	905.795	1025.06	703.614
K07085	4343.91	3097.29	2596.41	39.7143	1129.26	320.543	1690.93	142.658	327.262	283.079	632.791	1818.54	1118.44	26.6606	1292.43	1000.08	412.996	444.713	939.105	937.441	220.678	1324.76	1995.77	266.304	533.194	4220.07	3283.07	1483.99	579.226	2234.33	4468.26	3734.93	45.4098	100.608	1847.47	4660.46	861.532	250.439	359.634	820.845	3308.88	2453.76	28.6066	211.41	45.0665	286.482	1481.12	1081.77	299.057
K02341	2032.48	1495.09	1662.61	251.855	611.768	985.156	1344.28	297.15	1862.54	1720.71	892.358	806.882	958.866	437.178	1160.83	657.704	841.482	637.28	1021.13	488.727	177.161	2552.58	1848.16	7529.98	3193.36	2337.95	1447.63	1665.77	3717.68	670.684	3148.91	1778.58	69.0656	133.099	1266.48	2469.18	1311.49	163.433	182.189	999.012	2115.3	3413.44	75.5697	418.054	239.871	1139.81	887.886	1295.05	597.116
K00278	2833.33	3318.45	3759.82	206.727	719.418	677.535	1788.99	282.183	614.651	761.263	993.262	1510.46	1205.94	414.324	1640.02	867.487	1146.19	344.354	1139.97	653.702	233.453	828.167	1336.54	1258.43	2190.67	3860.08	2811.08	2764	2511.14	1709.89	4334.15	2193.71	50.5225	197.421	1403.1	3712.53	1081.03	141.925	233.855	695.057	2106.41	1736.94	66.2974	589.332	266.39	937.677	1071.96	1077.18	414.182
K11991	2177.71	1241.86	2079.79	382.391	1019.52	1066.53	1393.78	163.736	2309.94	1860.22	860.098	943.464	954.421	470.692	1507.04	745.642	768.492	815.375	909.138	635.278	201.575	2950.72	1721.4	8072.1	3251.09	1950.14	1641.05	1719.31	3446.65	579.771	3948.62	1898.03	77.9936	198.676	1453.15	2641.4	1265.33	141.514	134.579	785.586	1707.63	2611.78	83.9765	317.542	255.296	1082.83	1014.47	1401.81	669.844
K00215	2416.4	1970.52	2271.92	329.603	768.362	831.138	1760.5	269.609	1760.77	1661.68	1189.54	1103.33	722.382	340.262	1495.89	859.222	854.948	678.589	804.825	556.203	142.789	2657.44	1920.92	3018.73	3092.29	2521.38	1828.45	1955.35	3189.05	761.422	3895.3	2110.16	69.6458	210.447	1603.45	3089.61	1622.22	175.583	207.679	934.739	2049.05	3181.12	70.473	227.959	188.616	725.913	1135.45	1101.66	515.289
K15580	1022.91	1006.39	1309.19	281.33	812.046	1170.07	1737.71	430.236	3956.68	2736.57	864.711	177.53	528.625	229.359	733.614	457.476	706.394	984.908	852.914	307.047	25.1233	5968.79	1384.85	3746.06	3260.24	1889.7	653.574	2369.68	3365.94	165.923	1636.46	737.471	97.3218	232.753	1809.92	2244.88	2104.24	156.26	229.397	1206.43	1159.45	2707.76	63.9761	132.127	145.801	438.913	614.159	696.177	546.083
K13038	2784.66	2519.1	3041.04	254.03	820.977	825.05	1499.4	235.506	1173.39	1344.66	963.204	762.987	658.819	337.724	981.104	627.069	1018.96	783.617	136.173	522.81	198.694	2171.57	1868	4509.66	3628.65	2681.86	1825.11	2233.46	3441.72	807.322	3516.78	1698.86	62.6225	236.508	1374.75	3048.98	1618.85	145.085	223.997	784.373	1967.64	2875.2	35.6675	283.77	161.978	1000.54	741.879	1027.57	549.49
K00174	3677.29	3001.41	2864.87	164.883	146.05	322.227	1324.84	124.711	280.86	325.115	795.559	2127.23	1458	132.519	1120.88	863.447	929.254	763.04	336.755	782.879	385.067	1445.06	2192.39	560.348	1155.86	3698.14	3464.3	2218.47	809.098	2497.41	4739.08	3280.14	29.8673	85.0031	1507.75	4259.62	1171.91	188.148	324.153	866.408	2998.76	1990.73	87.419	925.764	336.367	732.503	1281.87	850.233	367.419
K00651	2539.68	1884.97	2352.41	298.418	753.653	576.506	1959.84	307.824	1751.98	1439.65	867.048	368.344	317.415	408.062	1279.16	639.214	690.695	327.333	24.7082	521.338	67.5746	3175.23	2003.44	3218.34	2928.6	2065.47	1535.19	2440.9	2974.95	923.512	3816.65	1776.47	95.8077	252.376	1775.28	3314.29	1675.42	151.293	225.088	880.961	2034.66	3334.08	49.1814	206.198	119.693	602.063	901.441	948.098	511.716
K01791	3292.67	2286.45	1928	535.124	1972.29	549.795	1364.6	160.34	1331.51	996.107	717.484	992.205	670.511	390.879	1096.67	633.355	629.928	442.455	232.799	941.743	189.384	3261.93	2009.9	909.503	2991.12	2866.46	2540.75	1873.12	2053.14	1559.78	3839.95	2313.26	97.1374	253.671	2482.83	4936.87	1506.83	260.254	394.648	917.603	1849.23	2286.57	40.5084	1285.61	209.1	631.257	1046.19	948.888	833.014
K03629	1858.92	1525.44	1621.48	191.718	971.81	702.211	1572.15	284.12	1695.72	1478.28	807.909	856.625	949.894	324.108	1024.09	620.839	654.57	661.005	984.16	554.133	172.434	3663.58	1886.05	5907.28	3425.92	2388.67	1482.09	1927.53	4011	731.917	3563.48	2115.15	84.8986	212.218	1426.01	2562.55	1111.36	136.111	213.679	1063.93	1947.37	3053.29	43.4378	245.377	172.648	654.54	717.356	907.188	516.345
K06949	2379.11	2155.77	2565.27	182.725	868.551	853.579	1699.4	267.805	1982.59	1648.37	741.136	814.864	775.217	205.329	1100.53	593.552	806.215	634.771	775.289	618.326	157.89	3293.36	2043.34	3891.34	2881.96	2399.75	1830.71	1942	2738.55	984.715	4050.42	1833.53	67.1917	222.068	1655.18	3443.18	1429.74	151.33	248.707	902.625	1924.07	2382.71	47.5538	243.919	134.692	729.28	1033.32	1137.8	536.758
K00783	2527.36	1962.21	2277.96	223.644	667.372	835.762	1413.34	267.386	1464.53	1379.55	799.186	667.625	887.121	415.087	913.607	564.104	908.414	620.363	846.997	440.998	211.416	3141.83	1891.5	3780.68	2912.96	2653.95	1626.43	2146.59	2872.69	1067.64	3683.15	1949.39	62.099	192.451	1691.1	2966.09	1299.59	139.288	251.15	931.018	1893.75	2820.19	72.6532	346.805	298.299	863.851	909.153	1035.32	452.018
K01735	2494.26	1719.15	2044.45	311.381	711.235	1256.28	1450.1	196.553	1974.72	1663.17	570.183	973.388	1170.77	471.493	1304.19	778.352	887.492	754.98	1522.76	609.758	195.897	2715.02	1937.81	5541.53	3194.49	2471.94	1669.97	1717	3150.55	885.29	3406.74	1829.88	104.011	288.284	1413.26	2800.57	1477.33	178.94	242.948	917.341	1640.18	2579.57	32.8962	178.808	125.27	805.249	1059.31	1239.1	520.64
K00763	1996.32	1405.65	1935.82	468.687	848.612	994.788	1964.49	365.436	2424.66	2074.11	1073.05	234.458	429.492	470.893	1551.04	706.207	888.779	478.314	88.7767	471.649	218.833	4098.86	2120.31	3802.38	3486.94	1428.71	1184.65	1947.2	4376.87	383.237	3801.27	1279.48	72.6728	231.717	1661.94	2794.13	1934.15	143.583	126.354	820.27	1381.27	3446.05	57.9471	252.609	266.096	924.688	811.374	1054.27	654.14
K01808	2638.25	2263.02	2645.24	324.055	998.956	1083.91	1663.48	250.558	1443.72	1657.25	672.613	813.323	762.503	706.331	1418.83	853.157	819.763	1066.01	204.972	688.784	307.501	1133.45	1370.87	5045.48	3253.54	1957.75	1810.2	1658.01	3010.46	1108.59	4659.79	2226.32	82.3741	257.992	1574.46	3823.76	1471.58	180.592	210.211	1001.31	1754.37	2322.08	42.4538	403.058	190.934	965.258	925.968	1029.1	813.384
K02037	2470.87	1294.7	1921.19	354.901	664.913	1108.87	1568.7	240.863	2017.86	1790.9	951.096	625.37	735.149	572.979	1827.62	876.331	855.208	845.463	978.606	658.736	75.4524	1481.68	1241.17	6504.67	3772.06	2259.91	1339.32	1387	3482.38	470.613	3026.21	1395.98	77.0188	192.621	1390.26	2594.54	1737.47	162.543	211.172	878.426	1622.67	3527.36	57.0136	142.891	183.91	964.708	1031.26	1197.72	635.551
K00175	3480.64	2969.83	3218.97	190.846	134.38	384.706	1143.63	83.7676	267.849	357.419	899.912	2275.6	1378.29	182.662	1135.13	918.537	1047.88	771.208	301.251	738.806	476.778	1357.74	2177.31	743.177	965.655	3957.94	3446.75	2034.33	626.692	2130.58	5017.77	3054.83	30.6258	111.176	1529	4255.47	1032.12	151.447	310.736	736.721	2795.43	1935.49	98.5241	1042.32	414.04	711.496	1170.81	853.749	423.336
K01847	3301.39	1614.51	1403.37	40.163	687.87	510.922	1845.54	158.416	269.502	249.925	654.417	2590.14	2294.81	37.9341	1458.19	1066.89	464.943	388.062	1781.95	785.551	346.462	3997.51	2923.02	630.734	587.14	3469.33	3004.27	970.536	892.799	3001.67	5158.14	3493.35	67.1984	59.9874	1785.97	3491.34	1082.41	211.858	260.25	954.928	2456.61	1640.37	74.9084	1066.19	397.343	550.974	1385.08	1105.54	283.978
K10119	2032.68	1966.23	2876	605.599	296.189	741.549	2225.67	687.092	2059.46	1727.68	2063.22	36.7841	193.201	762.714	1190.89	558.959	858.176	137.857	71.1149	366.522	48.1495	195.737	960.837	2030.14	4905.21	2545.39	1256.75	2255.88	6263.07	74.8822	2475.96	901.255	39.5361	233.303	1224.55	1830.92	1499.99	91.4988	157.04	1052.52	1930.79	4890.16	46.3806	265.905	158.951	364.409	804	973.841	594.083
K01686	3081.12	2372.74	2591.39	387.423	949.632	635.245	1876.97	208.312	1449.19	1260.28	854.171	660.202	413.726	188.108	1666.82	1000.35	653.898	723.893	92.9877	570.529	107.556	1127.42	1854.5	2237.83	2795.14	2321.79	2253.17	1192.56	1582.78	1450.16	4602.43	2719.39	74.9472	252.172	1987.56	4051.42	1980.26	188.56	300.681	1034.8	2343.26	2578.89	58.5599	166.053	85.8531	393.948	1636.33	1255.49	553.645
K14441	2539.79	1794.96	2466.91	233.533	605.292	1089.06	2010.51	292.638	1342.96	1451.91	564.688	865.471	1093.51	192.192	1139.79	630.781	863.037	472.205	890.889	514.997	192.222	2079.4	2016.52	5002.15	3373.57	2235.6	1655.74	1546.93	2918.57	1012.13	4198.1	2047.61	84.3239	296.271	1713.15	3387.51	1865	142.124	236.774	1003.19	1746.8	3095.36	66.0797	366.048	223.325	867.724	911.323	1013.46	571.594
K07636	3035.41	2725.73	2526.19	157.42	686.554	826.886	1898.3	251.904	794.971	949.406	511.806	832.587	899.21	179.799	1175.52	647.335	646.497	413.079	922.996	482.666	123.693	1040.27	1550.57	2193.76	2466.39	2757.1	2391.02	2035.15	3106.96	1386.81	4136.99	2511.05	30.8619	189.514	1341.08	3400.85	1254.44	180.455	343.485	1033.11	2409.21	2402.19	48.0433	397.633	156.044	492.341	797.313	868.683	429.305
K06178	2386.47	2244.81	2630.06	197.505	564.035	804.408	1496.77	174.982	1594.35	1205.3	723.849	955.36	646.341	192.048	1422.78	850.383	961.714	718.285	593.349	497.895	147.407	3171.01	1947.28	5030.84	1737.27	3163.27	1749.8	1844.95	1710.81	1000.08	3346.57	1733.52	61.1143	230.508	1641.78	3327.37	1511.88	139.71	244.858	841.089	1957.56	2612.39	56.7135	315.88	198.398	950.645	832.524	885.749	565.656
K18707	2860.1	2304.22	2705.35	172.859	112.82	806.593	1480.67	218.023	1231.04	1382.08	675.467	820.639	707.502	240.64	1068.85	569.98	913.982	708.845	116.443	583.918	165.101	1440.28	1810.36	6722.42	3292.93	2129.14	2066.1	1637.68	2787.02	1229.34	3829	1944.04	52.753	207.576	1437.99	3487.05	1434.81	170.121	269.361	960.324	1948.7	2892.39	50.3136	355.892	221.184	950.487	787.754	962.336	692.69
K00759	2819.99	3598.59	3929.57	313.355	691.18	690.314	1261.83	181.802	1418.69	1297.65	769.26	542.381	257.731	249.61	799.472	463.257	876.671	432.039	44.8397	367.506	72.2284	1597.79	1595.31	2625.18	3086.26	2682.1	2096.8	3183.45	2905.12	485.011	2746.27	1379.6	60.867	343.256	1651.02	3749.75	1556.15	140.595	230.252	779.916	2241.01	2703.92	41.6809	168.205	157.989	549.871	836.536	667.345	418.516
K07491	1697.13	1599.75	1297.86	750.866	1858.43	459.756	1637.76	287.955	1778.95	1521.22	436.029	297.83	126.86	459.277	619.933	517.013	451.259	191.809	38.1881	365.825	236.853	7709.01	1537.97	814.804	6265.77	475.612	832.168	4311.22	3219.9	150.481	3424.08	1085.8	340.853	337.27	2236.66	2024.04	1566.88	159.881	226.826	764.26	351.293	1563.55	15.8065	52.0042	47.4653	105.589	730.872	601.619	294.976
K06153	2431.04	2221.25	2500.94	470.445	660.75	900.707	1453.39	285.723	1835.26	1539.11	829.235	840.202	683.377	613.883	1191.11	610.824	622.307	567.516	831.524	627.342	159.958	1684.13	1324.39	3223.19	3695.15	2082.58	1612.08	1855.6	3291.33	948.036	3653.06	2048.05	47.4187	175.753	1476.37	2851.74	1063.39	181.043	284.549	1159.06	1842.36	3171.59	70.0541	301.064	149.903	631.485	1025.67	1084.95	632.003
K01815	3478.8	2406.37	2999.12	254.584	1293.42	610.941	1726.05	160.384	747.684	832.563	701.166	935.021	713.77	178.129	1001.2	729.055	635.698	543.649	245.623	475.886	69.8629	822.889	1903.96	2592.45	2475.33	2260.3	2375.45	1402.56	1687.35	1580.81	4083.19	2232.61	52.1028	272.503	1789.17	4543.05	1729.05	293.843	375.723	1071.62	2406.81	2872.33	35.2222	96.2412	49.4489	287.683	1243.86	1015.89	459.923
K02916	3328.42	4614.35	4559	370.555	262.453	715.755	146.662	14.4497	1019.51	1150.91	796.753	401.566	774.152	1004.1	1862.28	712.429	783.883	251.508	641.177	406.943	167.255	1884.54	1660.46	2250.46	3579.13	2668.26	2496.26	2147.11	2768.61	121.48	3707.65	2008.84	91.1002	301.453	1588.22	4169.16	192.374	88.5662	381.989	730.402	1695.69	2616.09	56.7886	604.719	205.989	568.928	829.52	883.176	475.628
K06168	2596.95	3008.39	3103.25	172.957	783.173	595.158	1642.73	217.844	736.689	740.429	1059.24	1193.36	957.112	484.417	1202.12	793.283	1105.85	465.666	1215.07	656.713	229.314	2166.68	1841.4	1141.96	2120.65	3754.78	2317.93	2420.04	2039.03	1247.52	4054.09	2014.88	48.1118	187.106	1428.38	3290.19	891.707	146.94	227.146	632.284	2314.33	2064.88	53.0302	381.574	172.924	766.597	978.448	1072.87	391.964
K03077	2654.28	4204.67	3899.22	330.856	2512.03	393.599	1912.78	268.868	692.429	927.63	1059.66	241.559	190.502	314.656	1143.8	704.04	588.583	43.6455	42.6838	525.359	80.8583	2792.85	1519.32	1048.81	2383.53	3678.33	2272.52	2173.84	2614.7	1007.68	3760.26	1648.84	84.4108	297.835	1481.46	4012.04	1608.97	74.0363	259.969	448.668	2169.2	2259	31.3893	67.1364	96.4044	567.245	760.603	962.717	263.92
K02217	3374.66	1681.89	1912.16	501.189	615.72	1203.64	2526.14	287.512	676.967	710.688	435.066	1229.43	676.607	166.558	1324.61	911.814	1037.32	581.871	564.084	432.987	381.553	631.56	1353.97	1588.37	1682.25	1888.49	2053.57	884.825	1034.32	1814.86	5067.86	3204.93	79.9261	137.654	2365.09	4164.83	1957.7	237.895	380.058	1094.55	2737.84	1996.5	38.4409	499.626	251.823	422.175	1347.61	1016.17	1104.46
K07052	1324.31	1282.29	1417.5	307.671	73.702	599.638	1016.9	271.426	4658.72	3125.97	1116.44	451.905	602.702	456.026	1415.56	658.944	529.072	302.903	551.293	688.497	65.4708	3320.76	1068.46	6742.46	3716.65	1637.87	1144.66	1887.16	4865.94	504.674	3837.81	1398.61	70.0637	143.015	1531.06	1885.04	1096.6	168.386	188.621	938.572	1348.27	1620.52	41.005	103.172	76.6894	834.972	848.036	1310.42	494.992
K03550	2121.01	1406.42	1881.33	204.107	432.477	947.508	1243.27	213.14	1845.84	1724.27	750.658	777.726	717.275	417.268	1199.9	719.125	824.505	769.6	670.731	472.991	79.7478	2530.03	1771.26	5912.74	2952.74	2125.28	1790.07	2066.05	3311.27	723.233	3109.77	1674.13	67.2849	194.143	1549.26	2581.58	1357.91	169.997	263.065	1015.79	1962.57	2795.69	37.3628	321.863	216.777	892.616	901.875	1189.73	617.504
K03149	2221.85	2834.43	3193.1	275.799	983.456	821.159	1518.41	258.236	770.182	820.138	1437	1294.48	943.22	513.87	1521.7	869.482	1189.93	710.924	943.443	588.625	134.872	2211.89	1721.29	1551.32	2873.36	3926.3	2229.99	1941.54	2883.44	922.495	3227.27	1400.1	68.4324	247.975	1534.37	3487.33	1670.91	99.9451	215.316	497.054	1889.18	2567.03	74.0561	314.389	198.444	506.285	911.25	837.515	451.244
K00765	3130.64	3853.28	3773.46	390.407	780.35	576.984	1376.77	260.502	964.235	1001.61	982.941	756.519	766.401	477.851	2575.98	1203.83	709.854	162.39	877.434	500.773	167.402	995.296	1307.56	1003.25	2635.18	3275.51	2519.02	1973.51	2102.72	1159.83	3854.27	2198.44	32.9554	179.011	1126.4	3130.88	1299.15	96.6791	261.422	576.242	2038.41	2111.04	13.2279	151.164	60.1245	477.63	1047.78	1202.38	363.009
K06213	2468.87	1402.14	1952.44	399.938	110.004	966.983	1733.76	274.488	1218.6	1551.4	602.782	638.297	404.144	246.015	1965.84	1017.96	707.185	463.805	48.1379	498.044	88.946	279.156	1420.68	3600.58	3824.02	1608.97	1570.38	1476.28	3862.15	1033.24	5339.26	2095.49	56.5579	220.869	1661.45	3262.59	1518.07	209.844	262.735	1162.24	1849.42	2887.06	49.1756	159.26	106.956	881.483	1148	1392.15	687.026
K02834	2545.64	1594.91	2011.36	236.254	749.981	744.399	1411.57	228.126	1854.16	1750.94	578.19	841.761	754.654	274.881	1240.9	680.227	642.46	551.086	569.712	510.884	182.877	3137.14	2072.31	4083.35	3098.42	1903.15	1593.87	1829.68	2608.94	438.774	3638.29	2130.18	74.1472	249.926	1707.35	2942.18	1520.51	149.938	225.09	863.43	1995.16	3053.48	29.8904	211.151	228.779	897.351	778.729	1104.36	569.036
K11072	2783.16	2368.65	2479.9	588.811	879.743	1077.65	1597.43	287.606	1818.86	1719.01	714.659	277.743	399.385	616.863	1750.9	887.102	890.316	439.298	57.8814	524.468	190.415	1689.81	1394.6	2692.08	3571.75	1747.12	1671.36	1585.92	3024.45	638.136	3685.11	1769.72	73.1303	252.923	1685.68	3402.06	1703.3	172.369	215.605	724.009	1731.22	2966.61	43.3898	245.542	178.6	437.688	1095.56	1127.89	708.256
K00931	2291.44	1235.92	1940.97	213.687	793.498	847.799	1659.1	266.852	1736.97	1452.77	855.868	1162.58	811.328	312.121	2078.64	1030	763.004	873.01	826.666	593.982	213.471	2907.7	1985.64	5622.18	2444.28	2072.41	1407.92	1577.06	2464.64	1018.68	3484.42	1765.67	78.3217	131.561	1295.1	2383.2	875.567	165.76	168.318	835.211	1715.08	2635.2	48.0391	134.67	102.857	594.279	1147.35	1127.66	563.588
K03648	2979.96	2542.01	2271.12	215.999	980.476	341.427	1565.65	245.791	1459.88	1207.65	1316.51	969.223	849.232	507.478	1200.17	752.943	616.692	370.872	128.37	581.828	235.599	1648.23	1107.11	1162.95	2792.95	2417.09	2560.48	2381.3	2601.13	1492.64	4646.17	2613.75	39.1152	117.705	1472.57	3212.15	1334.88	131.384	131.224	738.995	1870.35	2429.2	42.7863	497.081	227.481	612.749	1070.08	1083	404.908
K10118	1925.02	1716.5	2662.97	512.305	149.746	753.161	2021.93	607.949	2152.45	1745.15	1741.23	17.0385	184.366	580.497	1187.13	525.467	923.545	281.437	18.1123	340.246	0	176.198	987.02	2757.19	3969.73	2492.57	922.138	2389.89	6394.37	81.2286	2345.8	883.644	23.151	157.988	1211.21	1981.79	1572.5	90.0122	156.266	994.713	1864.87	4729.05	54.0639	196.311	156.638	531.307	700.323	858.211	552.146
K01929	2022.22	1658.28	1875.1	246.021	671.299	928.798	1323.6	269.219	1803.73	1704.85	790.116	1001.5	941.239	451.476	1017.2	609.024	811.161	569.165	936.985	516.312	202.622	2991.76	1814.94	4777.53	2762.56	2326.92	1529.99	1845.59	3375.98	594.371	2967.22	1453.72	67.7755	178.51	1245.58	2204.57	1204.52	158.177	208.199	969.544	1850.74	2857.53	34.0641	183.908	124.551	791.885	995.508	1233.01	672.049
K22132	2811.2	1756.79	2199.64	329.198	752.569	1123.19	1521.19	223.566	1182.32	1396.02	901.454	730.473	805.137	281.008	2366.77	1124.97	877.813	456.602	624.092	517.384	180.789	1880.23	1841.36	3721.12	3349.78	1651.66	1680.37	1236.75	2905.16	767.673	4005.83	1891.2	96.8481	192.305	1408.35	2872.8	1296.02	183.939	174.289	905.047	1726.47	3052.76	59.9209	763.394	256.557	1051.67	1105.13	1332.37	725.701
K02520	3007.9	3862.86	3334.63	408.959	490.165	539.2	996.939	143.032	958.733	876.559	802.515	893.134	1189.22	340.268	1171.4	625.291	790.84	287.877	811.358	520.918	284.617	2606.2	1555.72	1094.57	2381.51	3320.58	2453.71	2359.94	1968.17	1123.77	4003.24	1978.06	41.3426	128.489	1534.95	3395.3	1096.44	86.2689	228.681	627.862	1837.24	2075.07	78.1766	757.463	293.795	594.142	698.78	886.81	504.487
K03978	3024.19	2676.61	3141.98	215.997	931.405	722.787	1597.61	238.196	1730.34	1431.83	822.618	684.793	622.424	428.123	1333.38	625.329	723.808	403.892	94.1273	538.065	210.125	3040.52	1853.7	3191.79	3292.47	2016.94	1933.19	1823.57	2926.86	724.202	3380.3	1698.4	98.728	292.481	1602.03	3482.88	1714.15	137.525	312.832	774.017	1401.05	2225.41	48.4061	252.543	176.451	513.66	868.029	997.34	524.775
K02038	2402.6	1559.53	1891.12	543.837	762.948	1234.67	1199.31	200.04	1851.5	1716	1002.72	646.358	658.953	388.147	1154.72	706.391	789.978	697.434	683.869	648.843	234.23	1454.15	1208.98	4489.23	3205.52	2301.28	1541.32	1515.07	3595.51	474.107	3305.82	1377.18	68.4417	206.093	1401.27	2793.85	1618.78	164.651	195.724	854.856	1789.81	3514.38	35.972	209.704	202.265	803.475	1001	1237.3	638.468
K03650	1991.63	1737.65	1985	204.317	768.701	684.016	1640.21	262.835	1781.86	1653.43	565.827	749.223	722.521	221.792	1207.28	601.056	739.267	477.66	978.631	506.248	88.0184	3029.64	1990.42	6220.55	3495.66	2045.62	1504.71	1789.48	3369.96	684.463	3178.08	1701.8	61.7354	202.16	1231.71	2596.96	1164.29	159.219	215.285	858.061	1675.93	2636.97	33.4103	133.917	160.894	677.25	884.542	1085.74	559.283
K09812	2419.15	1818.41	2120.33	387.051	1120.67	679.754	1581.27	296.197	1766.27	1732.86	919.195	791.862	699.719	495.08	1432.18	736.478	633.194	918.563	123.59	557.794	272.383	2621.73	1836.46	2716.33	3063.02	1587.59	1744.81	1830.85	3057.12	914.623	3627.05	1898.16	48.6291	161.089	1375.96	2626.84	1361.58	130.582	198.915	724.3	1645.17	2486.66	58.6558	375.336	247.825	784.564	1037.26	1101.61	593.195
K02911	3257	3951.78	3788.27	379.581	351.211	520.326	56.4021	14.9845	1485.02	1322.06	723.731	646.101	820.119	925.359	1022.58	611.772	672.659	246.579	741.99	386.216	260.494	1348.46	1529.92	2184.55	3405.5	3585.43	2597.81	2384.45	2833.62	23.2583	3805.24	2190.92	59.7407	203.155	1544.68	4167.77	92.5778	182.943	340.937	855.835	1722.05	2586.85	69.2844	757.656	370.802	804.966	642.26	810.178	485.58
K16089	4550.16	2851.29	1754.26	15.8132	1449.98	52.6941	2015.94	169.129	260.454	194.774	503.001	1173.47	701.684	550.706	1202.63	886.374	323.688	427.029	137.539	608.569	149.549	2353.51	2653.49	167.024	262.861	2614.64	2710.16	662.173	383.537	2626.6	4092.87	3168.92	55.1849	53.9184	2052.9	4530.22	1532.98	194.419	304.924	734.54	3436.02	2244.89	21.0751	195.985	65.3936	153.69	1701.16	884.758	241.382
K01619	2786.54	1843.07	2231.38	398.299	655.754	684.303	1710.56	230.739	1700.7	1451.24	818.168	932.343	698.422	294.143	715.059	524.175	663.427	467.076	91.8092	562.201	183.87	2744.4	2086.56	2642.99	2853.12	1696.01	1973.66	1438.93	3340.8	1255.06	3940.22	2039	104.42	190.997	1653.55	3105.07	1563.55	170.57	186.037	962.838	1892.75	3151.15	73.3529	521.806	263.202	575.251	996.2	953.266	462.79
K00942	2303.69	1804.92	2007.47	221.278	775.023	678.688	1571.1	262.496	1557.81	1292.87	906.9	720.484	688.493	230.653	956.305	645.051	767.892	490.565	806.805	474.816	237.912	3253.78	1808.1	2989.55	2834.37	2222.26	1505.59	2178.1	2497.4	1084.35	3523.16	1962.09	96.3462	162.101	1410.37	2851.63	1076.47	101.998	152.829	800.853	1826.74	2382.98	62.106	255.936	158.207	671.43	977.041	902.756	425.98
K00027	2600.26	1522.78	2672.84	678.534	749.417	1522.08	1433.47	268.699	1493.47	1526.07	815.11	161.5	436.806	579.911	3363.76	1475.38	1126.73	829.311	78.2869	453.242	164.897	1903.81	1605.89	5249.99	4465.69	807.79	1159.63	1175.59	3507.3	123.396	3642.16	1047.84	71.311	239.211	1196.49	2215.68	1485.63	142.879	240.335	1112.87	1003.91	2820.94	69.1446	547.406	301.866	1051.85	959.299	1294.7	944.579
K03536	2118.71	1299.45	1658.77	180.331	630.905	781.424	1168.2	153.646	1875.89	1489.23	702.603	674.524	711.942	217.646	1365.59	765.62	746.468	808.551	563.285	495.046	76.3036	3128.35	1650.85	6144.39	3447.95	1926.69	1254.22	1664.33	3187.88	537.826	3088.06	1842.48	138.731	166.837	1471.19	2140.23	1362.48	139.454	194.891	913.297	1632.43	3370.62	55.0092	127.399	163.959	778.126	792.881	966.65	552.756
K00767	2874.72	3149.73	3495.88	443.249	859.366	673.811	1469.16	208.486	669.695	882.449	830.548	990.837	1131.31	593.649	2021.97	1016.34	699.674	171.315	1090.39	575.571	341.892	876.398	1162.98	1064.72	2427.53	2918.52	2319.24	1940.28	2310.73	1596.08	4423.25	2324.35	43.1079	153.295	1286.16	3617.71	936.056	111.089	175.399	627.87	1668.06	1640.94	47.7949	410.337	212.217	629.617	935.331	944.253	436.257
K02114	1795.12	1307.92	1988.99	329.146	627.34	1203.71	937.635	190.048	1755.14	2031.22	849.814	509.027	622.417	376.053	954.641	580.141	738.623	619.326	787.815	496.644	68.4944	2374.42	1462.64	7604.95	3496.79	1937.17	1415.04	1683.15	4613.05	203.823	2965.92	1332.36	90.252	127.414	1225.38	2377.07	890.616	175.213	202.996	1121.03	1556.66	2955.26	58.2757	83.9474	133.188	1052.94	796.918	1368.55	810.594
K20488	4468.77	3528.93	3206.41	530.382	383.572	243.908	2525.08	614.607	1686.98	2047.96	1632.03	47.2548	71.1294	1586.65	1608.15	717.215	494.659	219.734	28.5704	538.438	143.181	417.374	986.941	1713.68	5939.06	557.329	2040.76	1283.71	2976.26	203.05	5032.97	1615.06	26.3742	153.07	1634.01	4167.01	2435.98	30.4758	129.931	518.49	1749.62	3743.62	4.83352	110.438	42.4179	330.638	590.921	765.45	453.823
K01812	2870.35	3099.84	3591.65	176.956	870.033	659.03	1717.68	159.805	1236.61	1213.7	461.778	400.699	318.922	163.095	865.819	490.562	883.785	372.89	33.0901	398.201	54.3629	1034.07	1731.86	2991.58	2776.03	2986.81	2011.98	2053.91	1682.43	1022.27	3575.73	1840.73	94.7402	308.467	1811.16	4531.37	1939.4	154.783	312.924	886.24	2034.52	2390.66	31.1026	76.4648	80.6887	401.723	811.429	650.552	408.265
K00857	2623.1	2467.42	2639.33	212.268	344.643	635.094	1102.01	147.628	1211.21	1031.73	652.262	825.385	972.677	132.414	905.522	552.273	961.62	562.875	183.148	481.721	232.935	1833.28	1588.03	3850.64	2338.21	2849.5	2283.57	2387.63	1874.98	1438.45	2675.06	1793.45	40.8714	227.423	1655.26	3739.45	1238.87	138.98	319.751	940.009	1965.03	2294.03	69.1632	785.898	337.112	712.87	711.076	552.886	542.153
K01711	3241.54	2940.91	3156.96	274.356	598.133	521.097	1216.87	128.119	289.811	313.218	985.049	787.013	561.508	169.734	1531.39	1038.17	637.698	703.09	856.047	952.307	98.2617	102.786	1559.14	423.324	1322.78	3984.77	2894.58	1984.55	1366.29	1117.98	6343.25	2207.31	42.7888	171.209	1982.18	4041.26	1983.86	174.785	264.737	547.801	2435.47	1553.11	44.9733	318.302	94.6778	293.227	1554.82	1245.64	514.227
K01258	2285.02	2509.3	2913.94	256.262	553.979	997.554	1385.14	195.547	1450.69	1199.86	722.864	758.965	857.641	270.375	697.954	443.078	986.859	538.324	832.381	485.878	157.3	3095.9	1880.88	2951.6	2985.35	2979.55	2003.7	2176.08	3261.3	899.391	2811.89	1623.75	61.9873	264.376	1407.5	3067.49	1377.32	132.974	249.668	840.66	1757.06	2091.32	57.3251	474.438	244.401	635.785	648.209	670.027	501.187
K07456	2545.75	2172.42	2401.27	324.687	282.478	862.247	1472.5	258.993	1994.72	1708.46	773.559	547.926	649.926	366.511	1373	687.862	801.059	344.971	95.0583	495.855	165.924	2646.41	1976.4	2688.92	3127.13	1716.86	1820.15	1656.36	3064.02	955.414	3930.28	1729.39	52.6544	193.699	1465.16	3208.5	1637.66	133.134	181.247	754.879	1598.61	2365.01	53.2327	351.563	210.517	680.1	906.788	1015.34	651.647
K02503	2406.19	2023.12	2093.07	237.213	500.695	687.785	1268.73	181.981	1638.76	1295.66	782.66	748.041	546.802	218.953	955.007	495.395	653.574	497.178	676.643	482.097	111.791	2830.99	1680.43	2120.1	3491.18	2395.94	1941.57	1983.25	2770.08	905.53	3619.75	2142.24	41.6382	236.756	1742.34	3365.58	1152.16	142.262	310.473	876.734	1775.31	2809.24	42.2395	242.628	129.786	688.055	846.795	944.21	565.646
K03856	2314.7	930.446	2172.86	372.096	501.416	1460.48	1132.9	194.001	1635.84	1734.84	582.064	163.816	545.87	401.643	2045.34	842.639	1017.6	888.826	82.5795	363.614	96.9552	1642.54	1806.02	9003.94	3839.73	866.029	713.388	1117.82	3241.72	164.866	2861.27	805.029	90.9185	338.93	1458.76	2497.1	2031.46	157.614	242.304	896.46	1079.44	3512.83	47.2448	303.649	278.575	1101.11	618.632	857.417	782.677
K03628	2878.53	2855.89	2971.55	323.163	975.089	860.308	1481.25	250.346	662.609	715.592	1026.3	1075.86	1538.12	362.939	1193.71	803.17	934.406	544.664	1521.49	568.544	251.606	1547.28	1176.88	1418.95	2694.98	3936.18	2277.84	2389.12	2214.67	1077.01	3585.85	1733.53	67.2485	161.716	1123.65	2648.04	1344.98	82.272	143.993	509.943	1683.4	1970.15	62.7077	529.343	297.586	664.038	951.753	1033.89	356.958
K03501	1955.48	1320.05	1731.84	294.983	577.587	583.682	1507.27	348.041	1875.79	1390.54	770.79	418.433	391.684	309.227	609.878	428.14	843.142	416.706	72.8949	437.7	76.3921	2799.3	1839.3	4387.81	3483.56	1660.21	1267.02	2064.45	4055	640.112	3196.17	1514.12	77.2692	218.211	1575.55	2733.95	1327.47	142.401	172.344	948.055	1740.15	3815.2	65.9361	247.634	173.79	589.564	809.088	731.725	424.446
K02057	2273.81	1689.3	1638.82	452.466	1427.4	1286.73	1023.07	207.998	2038.94	2207.69	918.328	79.1982	262.65	273.209	1693.86	944.444	828.678	431.275	32.0813	380.398	92.0926	2555.61	1172.7	3596.14	4272.48	665.836	915.84	1819.33	3027.69	235.409	4583.71	1408.82	154.254	349.649	2110.69	2496.68	2129.36	97.4225	156.911	627.064	776.057	2458.74	49.4696	256.893	266.438	962.161	755.52	1188.53	807.519
K00286	2173.45	1545.84	1659.33	334.63	866.659	863.345	1518.97	263.662	1934.17	1663.95	950.999	512.348	722.69	508.482	1183.4	640.784	751.806	603.879	684.617	516.341	188.241	2888.53	1832.24	5431.35	2847.75	1995.22	1417.86	1445.29	3062.4	473.746	3260.08	1339.54	51.744	152.625	1239.05	2318.5	1221.85	153.632	189.005	838.785	1734.31	2593.61	36.4928	96.7873	142.216	776.779	1020.76	1100	523.46
K14155	2253.32	1818.02	1489.92	281.712	812.545	936.393	1253.19	255.623	1313.57	826.803	1034.94	1360.83	994.61	423.987	957.187	526.801	506.207	172.793	1480.94	513.783	96.5342	3352.14	2206.58	1239.38	1880.43	3033.95	1910.77	1742.45	2637.84	884.914	2661.42	1708.28	68.3462	166.967	1555.16	2760.8	1402.94	174.124	234.373	704.664	2609.31	2993.82	38.2448	105.191	68.4864	373.906	1069.12	979.322	378.591
K10947	2872.17	1773.96	2390.19	325.146	125.873	345.511	1860.08	364.497	1291.96	1346.53	564.905	694.518	635.964	280.792	2645.58	1259.27	665.313	66.2132	57.3744	479.483	167.215	1698.72	1673.84	2229.86	4395.39	1139.46	1701.14	1385.34	3647.73	814.857	5955.34	2132.84	24.7035	90.4472	1340.07	3570.14	611.983	164.232	307.281	1303.69	1463.48	2689.77	27.1859	372.931	115.379	416.979	991.305	1030.26	496.998
K07447	2132.02	1647.51	1834.22	214.194	623.168	770.204	1321.81	281.908	2156.15	1766.36	653.519	926.596	846.42	393.333	1141.06	670.553	909.789	492.959	852.455	448.218	104.102	3116.89	1660.22	4687.15	2847.45	1815	1462.62	1739.83	2805.24	615.104	3211.58	1848.12	71.2246	129.286	1214.24	2323.97	794.72	135.393	242.593	902.101	1860.78	2471.86	43.7824	288.72	200.668	682.731	853.938	1081.08	627.217
K12132	1241.72	1094.18	1394.54	424.599	95.3676	687.327	1204.04	362.959	1636.52	1515.22	1223.1	102.461	263.482	597.995	1228.8	547.344	936.624	654.573	27.666	281.53	79.7491	2580.95	1579.65	6804.11	3221.25	1624.3	756.836	1857.29	3518.4	106.032	2295.63	763.577	43.8184	182.141	1101.88	1586.08	1258.78	110.21	198.937	1082.16	1985.09	4404.67	64.6179	223.177	191.637	943.167	664.182	870.078	686.264
K00945	2129.89	1935.95	2527	149.839	495.718	629.825	1461.8	263.896	1887.74	1612.53	629.669	1165.97	875.724	188.554	1244.11	684.026	683.238	631.206	946.008	505.62	173.32	2501.46	1786.42	4158.4	3063.97	2125.44	1787.52	1930.88	2822.96	927.721	3455.51	1783.31	44.0338	149.463	1123.92	2575.94	749.388	153.581	249.587	929.263	1727.61	2212.44	60.2441	408.706	188.192	575.43	909.833	1095.62	460.616
K03615	2500.29	2110.37	2757.8	155.407	395.312	886.844	1639.52	234.252	1165.04	1279.79	566.118	771.671	583.633	256.865	987.84	614.4	899.435	602.737	119.838	532.268	193.705	396.166	1298.44	3268.43	2777.08	2536.65	1910.98	1693.59	2525.76	1263.49	4195.94	1989.55	59.9759	241.24	1576.05	3854.76	1442.98	116.778	219.958	785.835	1789.7	2326.82	58.1682	448.105	230.234	1011.14	885.973	1007.87	621.112
K01676	2850.6	3972.31	4208.66	60.6631	1589.58	462.923	1637.98	111.657	99.8669	110.283	521.743	1407.16	1208.6	92.2598	727.186	577.85	926.469	288.447	1021.15	573.969	225.843	1469.28	1476.02	456.285	1240.11	5432.82	2931.57	2313.29	695.371	1752.52	3294.57	1886.38	107.935	270.876	1526.09	4077.72	1156.48	103.084	307.023	630.031	2155.36	1293.12	45.5517	618.347	229.814	521.053	763.452	531.849	261.083
K03217	1898.96	1531.93	1977.98	198.622	721.964	492.107	1418.78	270.297	1931.44	1506.22	877.938	730.336	601.365	273.478	1084.26	529.617	625.465	276.314	787.768	428.096	68.354	4155.07	2142.12	1943.02	2942.03	2509.99	1463.14	2044.43	3075.49	732.641	3181.05	1633.5	71.9112	166.856	1293.01	2669.15	931.251	132.66	219.446	835.891	1719.73	3001.66	39.1749	180.536	98.9302	364.113	818.47	904.66	495.469
K00077	2396.71	1538.9	1471.07	609.753	674.813	1103.36	1282.06	249.376	1604.42	1735.96	1399.87	483.411	516.22	269.117	973.889	658.2	960.301	986.302	688.882	508.015	60.0454	1842.11	1660	4461.54	2812	1818.38	1450.75	862.067	1889.94	640.101	3364.5	1610.2	74.098	154.033	1237.13	2766.49	893.222	188.137	344.856	1021.49	2081.33	3435.35	56.8294	150.626	116.862	325.828	1435.61	1307.58	717.691
K07007	1431.51	935.95	1830.48	339.754	714.877	972.355	1889.09	334.528	2673.76	2331.36	585.418	321.623	445.139	324.863	1069.37	486.608	973.547	1037.96	85.7379	426.186	116.868	2774.96	1498.45	10781.4	4068.34	698.505	844.639	1194.68	4023.85	235.772	2930.08	1035.82	53.9773	258.977	1155.68	1774.08	1106.96	123.43	197.336	1124.22	993.424	2548.43	46.8077	215.872	194.923	817.214	723.433	1147.52	695.024
K16786	1747.63	1280.77	1923.56	406.149	847.062	1169.19	1422.74	236.298	2978.8	2462.58	861.007	201.372	388.645	606.529	1224.55	556.466	783.87	627.932	92.437	405.448	202.749	3393.76	1974.78	5467.71	3925	655.369	773.385	1718.09	4183.57	116.59	2787.39	688.474	85.0078	228.972	1295.18	2199.9	1620.59	108.72	132.49	673.592	994.471	2655.97	38.9278	245.958	209.116	799.995	637.148	1069	678.45
K02823	2253.64	1298.35	2358.1	356.817	126.636	854.732	1242.87	257.322	1824.81	1707.68	858.024	351.923	322.635	312.885	2605.72	1133.85	770.751	511.657	91.2465	419.193	115.412	1660.21	1630.84	5523.5	2879.02	1500.62	1233.66	1131.2	3316.92	700.65	3476.12	1712.27	50.2888	148.058	1324.07	2543.95	1207.23	120.099	222.798	934.874	1502.96	3061.8	43.7768	253.997	147.555	739.79	751.005	982.157	647.338
K02970	2681.71	4278.7	4108.26	603.776	1067.39	808.877	164.915	12.0521	1049.78	1259.1	777.38	522.422	972.791	286.997	1806.63	1021.78	903.027	458.06	458.647	542.853	335.492	1995.15	1334.07	1297.3	4059.45	2489.06	2552.71	2699.19	2946.9	92.2717	3036.4	1891.45	102.706	257.538	1368.3	3389.58	67.022	107.083	264.634	649.108	1424.69	1916.08	49.8798	492.283	292.578	680.664	723.197	749.229	550.004
K02346	2609.88	2277.16	1941.48	482.74	872.384	610.92	1093.62	226.32	2146.57	1769.42	1669.88	791.326	780.488	395.501	709.802	415.094	718.325	356.833	734.31	595.728	128.071	1716.86	936.303	1375.77	2019.92	2213.8	1857.82	1871.47	2555.71	737.469	3754.68	1788.69	57.6751	177.474	1460.63	3288.06	1536.34	167.581	276.121	1263.45	2091.56	2710.06	42.2413	215.334	108.585	367.981	929.535	1119.32	371.925
K02647	2646.63	1863.98	3207.87	682.573	1193.4	1122.44	2307.5	427.001	1480.72	1760.16	796.764	115.955	372.247	592.79	2951.18	1159.75	811.3	236.454	99.5946	433.726	179.413	761.625	1015.19	2384.7	5264.65	793.081	1297.5	1359.78	4025.86	247.978	4126.12	1078.29	71.3853	301.631	1311.14	2703.32	1710.26	63.6891	143.586	740.123	884.72	2769.28	40.9929	645.257	162.043	617.65	806.058	1208.76	783.071
K07088	1039.11	1591.31	1817.74	476.022	364.785	773.714	1553.52	411.07	2315.46	1846.55	1096.97	236.253	506.806	414.009	945.953	490.391	788.358	370.33	671.857	307.79	38.3697	3872.04	1969.11	3071.91	3969.11	1849.43	926.047	2036.48	4143.7	127.63	3974.98	845.691	87.1119	191.942	1505.53	2634.29	1032.02	110.671	153.295	823.359	1131.64	2580.85	43.464	80.2109	72.1244	610.994	922.94	1283.91	488.606
K04068	2283.2	1553.77	1573.63	190.36	584.77	736.601	1516.23	265.064	1900.52	1906.55	927.461	710.798	375.878	336.667	1194.17	617.424	747.152	693.415	42.9333	431.308	66.9068	2827.15	1776.67	3459.24	2720.68	1593.27	1493.98	1573.32	2667.84	523.501	3316.62	2014.57	59.7299	162.774	1337.59	2462.79	966.263	129.412	190.513	967.98	2119.4	2958.53	57.5986	112.373	111.018	1003.3	758.484	1185.35	632.867
K02939	2470.17	2348.47	2409.61	281.579	500.316	848.971	1296.96	256.885	1370.96	1294.09	710.04	724.582	864.025	337.784	941.143	544.587	605.162	281.152	997.33	452.929	209.689	2365.82	1684.97	2060.1	2322.03	2795.89	1662.14	1945.83	3054.36	1146.26	3601.06	2058.71	62.6336	150.607	1377.27	2965.36	826.312	105.187	212.731	664	1811.63	2732.08	19.6579	248.991	261.303	719.513	764.376	950.918	336.363
K01776	1955.75	1386.63	1569.62	226.249	757.108	587.955	1440.07	275.332	1872.37	1431.67	841.202	503.351	429.032	333.388	1017.52	515.551	729.056	638.819	63.5361	493.265	105.903	3409.71	1935.25	5754.48	2339.44	1821.65	1357.35	1769.87	3237.14	613.017	2759.99	1503.08	58.6348	163.136	1314.34	2329.31	1080.25	152.963	188.93	880.041	1773.7	3001.99	56.6057	229.474	150.744	582.361	843.408	937.431	588.081
K00954	2100.89	1415	1532.18	220.212	770.76	650.432	1499.97	253.299	1570.05	1409.26	795.626	842.646	689.528	266.202	1111.6	663.283	650.591	327.741	881.325	484.999	169.539	3301.45	1797.92	2189.97	2670.94	2235.18	1421.55	1517.44	2445.99	862.556	3431.64	1985.73	84.305	153.474	1590.88	3000.48	1482.37	181.522	257.147	885.587	1747.18	2698.5	51.2431	331.132	223.46	675.36	951.92	993.491	422.454
K03406	1081.91	1233.18	3244.86	192.337	24.7997	895.27	2255.66	556.876	2760.15	2352.05	1578.67	62.8203	51.9312	226.98	1533.2	766.089	567.391	93.1991	24.0001	674.734	31.0112	0	501.969	647.677	9864.99	741.105	1427.41	3476.67	9232.31	136.1	4360.49	726.04	11.9375	204.04	709.076	371.081	710.145	15.9936	0	747.729	334.233	156.592	40.7053	27.9419	25.6888	366.713	740.153	1287.92	168.371
K05366	2320.31	2064.17	2529.89	189.123	804.525	835.571	1795.73	259.528	1405.11	1265.95	569.448	931.205	774.658	148.753	1123.62	566.922	765.13	344.653	915.078	506.044	129.856	2384.82	1790.56	2353.62	2502.07	2576.01	1897.83	1773.49	2611.98	1206.02	3662.56	1783.99	67.1179	230.859	1424.62	3322.38	1376.98	126.19	193.287	747.126	1620.1	2204.55	33.8085	312.659	159.97	583.167	876.091	908.534	387.326
K02913	3172.53	3611.27	4030.08	674.609	671.388	753.549	46.1632	23.7919	1417.23	988.865	813.948	624.694	617.089	550.98	2059.04	880.934	563.138	60.2286	396.301	380.883	153.403	2675.23	1446.07	739.684	3802.42	3172.53	2544.63	2256.07	2355.79	28.3324	4145.36	2413.02	53.823	248.842	1407.37	3518.38	47.0325	108.246	312	642.81	1424.8	1890.52	30.8757	984.881	83.1712	434.884	664.964	624.671	499.897
K07107	3471.43	2261.15	1916.61	225.548	546.482	478.966	1712.48	226.363	861.467	811.19	665.755	1285.12	1041.62	93.6358	1662.33	1066.09	449.489	713.345	1498.13	656.877	355.147	2456.86	1840.47	160.964	1240.77	2516.38	2179.42	1236.82	1206.05	1718.03	4538.67	2632.21	83.6883	50.0455	1298.02	3167.23	859.351	163.342	290.758	668.944	2317.1	2190.88	34.447	149.12	110.879	535.614	1430.15	1447.36	353.113
K07729	2186.81	2466.43	2960.29	706.649	148.697	543.151	387.839	78.1824	3691.83	2744.98	1626.35	236.504	370.107	395.697	3487.8	1374.23	1019.81	298.705	107.553	496.413	184.312	2246.49	934.708	684.297	5911.58	929.823	1555.88	1359.91	4665.86	52.3377	4040.71	1104.99	26.0187	108.11	1667.26	2877.74	222.584	99.1278	189.036	1158.86	1045.23	2783.51	36.1133	209.437	129.319	391.369	674.443	974.285	692.297
K01625	2656.16	2696.07	3437.91	381.207	699.475	729.941	1421.8	188.258	1233.78	1095.63	703.724	301.836	281.462	114.213	698.607	506.784	834.44	413.263	19.003	377.784	33.794	829.914	1545.34	3536.8	3117.35	2789.72	1551.38	1706.16	2216.46	750.238	3296.54	1288.41	93.2595	291.015	1609.03	4065.75	1825.57	193.412	244.305	843.156	1901.12	2734.45	33.7446	98.0605	131.968	541.757	742.283	686.422	451.019
K06959	2572.73	2152.17	2213.93	461.051	1236.04	772.72	1544.5	252.781	1762.27	1558.65	1133.44	934.735	797.416	777.633	2072.56	1123.38	726.253	938.568	251.358	676.155	284.508	3202.29	1584.55	825.664	2685.46	1550.83	1825.83	1714.12	2687.06	778.149	3845.79	1865.11	68.256	125.689	1245.04	2567.52	1111.07	96.7922	121.412	465.712	1424.73	1758.55	59.2524	299.928	169.904	610.599	1253.79	1425.63	629.389
K16787	1630.76	1163.13	2083.39	373.181	700.756	1070.43	1215.53	259.875	2918.02	2169.77	707.162	119.059	256.924	750.556	1110.02	523.732	736.195	455.693	60.1024	351.531	113.716	4594.23	2476.41	4496.51	3678.13	697.633	733.711	1740.94	3719.11	132.163	2663.83	696.893	89.8059	325.739	1412.44	2426.33	1855.39	81.0915	139.269	715.02	931.408	2712.82	35.5827	133.291	172.002	752.432	578.044	795.893	645.569
K02377	2985.84	3393.58	3177.13	221.305	617.771	577.488	1007.91	91.2952	307.878	383.805	888.923	681.286	653.099	149.59	1664.02	1062.2	682.791	246.384	691.421	544.351	67.3852	74.584	1470.77	506.567	1258.89	4205.52	2687.65	1860.94	856.173	891.673	6422.94	1746.51	43.2891	181.618	2000.34	4014.31	1940.49	169.347	199.491	455.666	2305.4	1442.1	92.7836	325.113	139.04	389.976	1662.04	1281	291.084
K09748	2783.62	2940.37	3047.2	169.939	532.548	374.503	1416.01	293.112	1586.56	1608.52	507.482	599.62	409.977	110.573	1171.62	615.207	708.065	468.399	80.6846	480.652	81.4802	2603.06	1931.44	3201.4	2698.56	2039.78	1927.52	1633.14	2115.48	697.724	3539.75	1786.47	43.2041	188.961	1517.01	3368.24	744.56	141.906	332.876	967.116	1831.86	2191.58	0	107.713	58.9351	558.26	851.605	826.707	428.85
K01495	2699.24	3467.14	3514.89	219.429	479.411	266.333	1240.1	150.465	1126.86	681.123	1033.31	724.729	599.135	299.153	659.273	391.93	565.953	237.683	148.599	436.679	212.743	3573.79	2448.24	1032.33	1762.6	3443.71	2569.01	2143.36	1202.4	1276.45	2913.43	1792.39	58.0199	178.155	1223.25	3474.38	1285.6	100.322	201.21	561.984	1880.84	2127.68	55.028	599.985	200.955	524.778	604.031	500.573	342.691
K01995	1901.27	1544.93	1704.71	461.194	948.382	1346.94	1158.39	277.019	1691.05	1684.22	740.271	147.691	412.513	699.016	1084.03	658.141	944.277	539.89	78.0641	311.813	168.57	2722.02	1615.61	4604	3279.56	1544.8	964.669	1583.2	2710.12	172.499	2764.76	858.55	108.574	219.589	1353.79	2353.58	1598.45	91.6226	167.497	679.772	1119.02	3534.2	77.8929	782.174	282.788	955.039	532.166	753.871	796.377
K03816	2393.75	1585.25	1888.51	226.127	171.88	660.686	1440.95	283.676	1800.85	1648.63	801.578	313.205	412.751	280.899	1458.72	654.863	634.102	491.426	41.0673	309.155	190.447	2191.31	1709.37	2584.74	2861.58	1690.4	1113.89	1606.9	2868.19	570.58	4170.38	1367.25	71.7678	216.586	1731.73	3589.69	1871.07	140.417	226.929	752.792	1736.59	2950.14	28.5603	188.118	159.216	673.623	892.646	909.876	473.111
K02338	2081.07	2082.19	1638.98	225.882	902.503	337.499	1706.43	301.653	911.543	864.516	906.478	991.568	1027.82	312.762	1283.56	763.725	498.876	246.091	926.789	533.088	232.171	4001.12	1786.61	900.815	2866.62	2217.8	1696.73	1660.43	2375.67	1494.64	3755.43	2166.96	62.0348	105.002	1233.34	2518.95	1142.13	83.215	87.8452	554.638	1652.22	2370.81	70.303	436.573	220.192	535.636	1055.36	1054.88	290.153
K11755	2741.41	2219.82	2914.55	284.201	589.027	690.019	1778.49	286.842	1103.06	1236.5	621.236	555.736	380.271	355.103	839.869	498.401	708.959	523.329	69.5631	366.582	110.42	659.689	1464.11	3229.83	3129.15	2171.84	1889.45	1532.28	3053.62	934.396	3520.94	1874.67	86.5091	304.378	1713.52	3850.83	1684.55	184.506	291.46	855.867	1692.6	2771.85	26.3511	95.7231	64.3397	370.639	859.878	807.807	525.027
K02904	2901.49	2173.08	2045.17	379.274	317.749	605.692	137.179	17.3665	1948.55	1671.75	864.07	593.94	672.384	1070.44	1672.34	858.697	537.034	173.929	459.025	349.249	131.616	2048.69	1613.63	2072.84	4125.77	1779.52	1630.34	1897.6	3750.42	47.2855	4566.23	2050.04	60.6103	182.938	1599.44	3447.74	156.19	108.715	174.057	835.452	1593.01	2938.46	53.6967	433.013	223.029	700.489	730.836	797.386	436.574
K12308	2205.39	2095.1	1961.59	340.106	47.2838	520.461	1411.49	380.575	1681.26	1225.9	1379.64	881.491	612.342	372.362	859.591	544.245	916.921	151.491	748.554	480.491	27.0135	492.333	1244.75	1658.72	2300.98	2581.36	1585.37	1634.87	3034.38	617.288	3109.61	1544.14	0	55.5123	1290.75	1846.68	1143.78	153.41	215.166	863.883	2436.09	3305.8	36.8103	85.8284	69.4944	381.34	1034.28	885.311	310.811
K02117	3066.52	1832.31	1604.85	803.362	1138.22	1060.29	1423.98	218.176	1354.78	1483.29	1273.9	961.229	1615.36	576.306	2169.32	1026.6	715.723	580.197	305.882	664.584	521.752	559.112	762.466	948.01	2104.49	1622.95	1921.66	922.068	1290.35	1424.17	4327.12	2198.55	31.2915	81.1617	1182.84	2859.71	1253.62	104.185	173.779	580.684	1854.67	2599.52	77.3104	1927.91	492.995	837.877	1083.97	1269.88	902.018
K02342	2678.01	2208.21	2112.77	107.108	539.86	336.257	1065.98	182.259	976.228	794.226	717.151	1354.92	943.621	100.697	1326.82	859.281	414.171	233.656	1087.15	522.565	172.277	3215.23	1670.36	833.347	1310.96	3111.88	2045.71	1842.63	867.725	1625.26	4152.29	2315.12	34.0823	78.3586	1632.57	2902.13	1082.84	106.498	171.571	548.908	1971.39	1929.19	88.0256	415.985	226.018	782.987	883.361	847.671	262.419
K06997	2030.07	1658.97	2086.69	250.096	525.156	893.06	1168.6	251.564	1606.12	1580.66	743.854	605.776	657.642	333.77	930.567	638.615	790.202	468.798	872.598	408.799	123.471	2901.24	1755.04	4645.3	2785.32	2022.16	1294.02	1308.38	2588.77	679.924	2866.47	1499.69	57.861	208.843	1347.15	2373.68	1301.87	113.645	182.788	806.562	1517.25	2923.8	41.0467	167.053	190.479	1037.08	877.903	900.958	483.755
K03718	3240.96	3681.81	3273.65	129.681	613.046	106.657	1452.02	88.513	100.731	107.128	499.728	1264.11	571.927	42.2	614.354	410.325	389.685	109.302	74.234	526.618	143.944	557.295	1513.66	293.796	1192.05	3046.19	3194.47	3067.36	893.831	1838.61	5062.05	2740.17	59.8431	139.596	1939.57	4352.2	787.784	163.228	316.446	622.036	2950.02	1646.98	0	228.24	115.838	226.577	987.728	464.397	153.294
K03614	2421.65	1290.92	2080.06	134.912	440	701.252	1299.65	179.344	1414.15	1558.84	447.14	657.573	566.193	147.915	946.343	612.101	767.8	798.328	76.34	530.439	142.068	513.694	1354.97	6123.78	3340.48	1532.47	1406.02	1305.08	2903.09	815.419	3583.35	1822.58	73.8754	198.871	1220.09	2747.42	814.65	192.423	336.259	1308.95	1630.48	2807.35	37.7169	180.643	131.393	735.123	774.731	1026.14	664.883
K00766	2353.06	3524.21	3535.3	327.492	198.036	540.813	967.658	230.65	1646.02	1181.91	2657.97	296.844	248.301	463.272	710.496	448.844	1114.42	232.42	109.311	361.302	72.7793	1970.28	1931.85	1267.87	2120.88	3227.73	2153.56	2320.15	2472.04	776.167	2268.2	1201.27	33.509	187.934	1118.59	3130.72	1178.73	102.129	212.256	442.361	1915.49	2115.89	26.7185	147.086	127.95	431.445	823.62	796.929	402.562
K02687	2209.35	1578.1	1939.81	198.378	614.575	816.582	1186.95	221.967	2146.02	1865.58	636.794	441.755	791.101	262.065	1427.13	653.292	738.2	431.729	735.119	488.664	167.082	2455.6	1392.57	5124.27	3261.15	1641.23	1138.83	1232.19	2876.66	554.283	3415.96	1295.1	61.4464	217.981	1552.69	2630.86	1514.3	116.249	172.718	726.676	1257.05	2709.06	63.9918	225.254	159.202	744.65	917.762	1052.16	507.298
K09761	1640.72	963.896	1345.7	244.846	616.142	917.759	1500.73	248.875	2038.3	1563.15	749.881	770.476	753.399	402.702	1284.28	647.543	839.311	567.224	682.097	452.421	67.81	3055.76	1635.05	6497.72	2335.63	2048.18	1142.49	1033.19	3239.17	559.701	2614.71	1633.03	60.6729	174.649	1298.6	2149.35	1064.19	148.712	168.524	916.72	1599.69	2825.49	47.3537	97.3549	133.63	828.608	845.254	1133.68	499.042
K03630	2536.39	1911.36	1940.94	180.543	2530.37	407.385	1956.78	340.878	1763.47	1490.61	533.397	673.266	647.986	245.627	1229.72	788.777	628.431	479.039	828.951	830.176	120.634	2861.63	1472.4	2311.13	2665.3	1800.73	1701.74	1296.86	2403.24	1503.83	4173.24	2062.63	93.4258	132.519	1235.7	2062.85	865.179	124.82	163.027	942.468	1307.08	1787.82	28.6315	112.925	50.4817	368.946	1045.54	1321.66	400.85
K02888	2822	2492.46	2647.89	324.05	669.243	543.991	1001.97	189.084	1077.46	1042.48	686.053	510.008	455.691	757.45	1264.13	667.719	516.955	55.8106	385.178	469.538	150.149	2811.43	1657.62	1272.83	2820.38	2277.84	1774.93	2166.67	2376.39	685.407	4270.92	2064.27	64.4341	207.262	1537.18	2889.06	946.578	134.602	248.239	572.374	1829.47	2361.67	29.584	261.639	95.3845	501.18	799.993	856.98	403.618
K03734	1926.49	1625.94	1689.24	208.38	624.051	534.257	1313.5	260.203	1224.64	1103.18	647.757	842.188	725.054	466.706	781.145	430.7	742.449	666.269	899.811	386.3	139.02	1656.24	1148.51	3555.53	2803.83	2154.78	1465.36	2028.46	2864.34	675.673	3041.96	1667.33	52.2217	115.295	1037.97	2306.39	997.457	165.553	205.263	835.766	1884.81	3107.88	49.2884	274.284	148.644	818.476	756.831	917.739	461.75
K06901	1508.17	1123.92	1640.69	421.076	1901.24	784.441	1844.1	292.355	1799.57	1546.69	745.511	66.923	186.527	341.769	730.713	404.317	663.88	354.458	45.2197	430.606	53.555	6455.49	2769.76	3386.04	3081.32	1366.43	709.988	1955.69	3191.06	193.218	2319.58	678.483	175.552	366.829	1755.61	2174.36	1945.92	98.2946	158.291	633.344	985.334	3028.09	36.9825	137.353	144.449	681.118	544.908	763.686	537.177
K00760	2756.75	1348.63	1693.33	281.32	623.564	666.305	1090.33	165.595	1478.78	1418.46	916.989	674.81	482.919	463.954	885.274	510.514	539.82	332.977	459.887	463.889	133.315	3056.91	1790.71	1843.08	2391.37	1833.44	1630.61	1588.05	2752.37	729.29	3602.6	2062.9	59.7226	192.807	1667.17	2911.42	1446.22	146.421	219.181	829.031	1800.52	2954.43	60.9841	317.292	165.312	596.08	941.795	856.814	427.321
K07560	1964.32	1128.46	1543.69	182.415	797.669	672.916	1872.15	319.131	1758.91	1432.59	931.128	592.352	732.207	298.216	976.461	439.715	620.585	377.293	906.862	488.311	126.916	1595.5	1133.29	3214.1	2540.36	2279.49	1490.49	1575.18	2593.11	902.131	3689.26	1565.04	54.3664	176.192	1389.63	2976.86	1292.47	191.238	214.612	762.856	1510.47	2838.6	33.8198	112.301	99.3139	888.027	780.077	1054.97	510.825
K07001	3291.6	1676.58	1461.19	85.6632	480.077	301.116	1458.35	176.825	609.598	549.99	382.723	1275.06	670.929	110.02	872.458	595.221	450.62	492.076	143.229	653.48	167.074	1149.79	1582.86	4522.41	1399.18	1898.56	2290.89	692.398	1382.55	1906.3	3555.41	2932.34	39.4832	77.8845	1537.22	3867.61	991.702	248.835	335.246	1097.17	2585.1	2345.88	34.1124	144.469	88.5847	244.091	1271.53	894.415	461.388
K01270	2915.82	2176	2165.33	76.8215	537.449	203.626	1741.38	162.781	585.939	504.147	597.948	1560.71	864.042	176.045	882.551	619.698	559.537	326.159	257.631	679.761	280.266	2218.12	2097.05	352.011	1370.19	2438.64	2738.39	1472.63	1629.81	2054.42	4344.2	3027.45	38.4475	86.8179	1417.7	3770.39	908.886	199.138	241.884	851.949	2335.24	1722.69	29.3056	342.036	143.759	284.7	1024.59	840.066	308.579
K07025	2819.06	2993.05	2302.43	294.517	29.7195	130.409	2185.33	601.728	2131.76	1322.65	1132.17	572.815	224.551	459.638	582.116	347.479	492.839	83.55	43.2741	398.422	31.06	1287.99	1396.27	871.807	3246.84	1973.71	2378.85	1156.34	3403.17	562.361	3168.71	1484.79	5.96362	63.3396	1457.91	3446.11	1786.67	241.676	331.688	887.874	2567.24	2580.65	27.8178	109.155	65.954	149.174	807.668	679.092	300.093
K02622	2411.99	3757.6	3487.09	90.4525	639.993	474.423	1174.71	115.976	762.224	449.669	1176.39	1309.97	1158.38	187.87	740.566	574.906	931.393	206.62	996.995	505.399	189.489	1579.79	1516.85	684.175	1249.44	4333.21	2775.24	2924.33	993.808	1392.49	2841.9	1666.71	48.4456	173.356	1277.88	3384.44	1090.32	123.334	235.05	527.133	1978.74	1170.84	54.4101	523.295	237.376	584.13	706.286	546.128	228.236
K02860	1828.28	1182.22	1707.67	228.348	540.767	574.74	1381.45	275.277	1672.18	1429.33	631.134	558.257	282.473	328.496	850.304	488.829	665.188	529.369	58.789	368.926	84.5188	3039.92	1786.34	4691.22	2473.61	1618.52	1295.05	1609.08	2799.73	548.456	3011.25	1657.98	65.5446	189.015	1507.54	2489.67	1327.97	134.777	183.559	896.988	1826.27	3143.54	44.0566	80.5872	72.1634	478.466	757.412	905.752	472.575
K02109	1878.41	1277.78	1616.79	138.542	491.405	948.072	725.152	141.668	1991.26	1792.41	833.051	750.384	538.663	170.696	1123.61	675.884	728.929	433.018	396.921	460.277	96.8142	2569.01	1506.63	4149.83	3053.98	1733.04	1015.91	1698.25	4106.02	336.212	3203.88	1393.21	77.6948	216.194	1520.28	2698.11	913.131	159.2	215.522	872.739	1626.69	2503.46	73.6836	132.717	213.726	1142.74	804.802	1089.47	537.928
K01607	2675.14	2377.02	2453.8	416.329	209.056	592.557	963.568	320.871	1155.53	1316.45	1297.3	448.066	513.599	961.319	1365.45	679.097	728.516	227.333	662.651	355.909	73.0566	555.576	999.611	1579.18	3134.06	2072.35	1978.08	2243.58	4158.53	786.179	3462.16	1825.56	49.8344	169.383	1300.4	3265.59	1229.35	105.888	115.709	574.812	1659.79	2926.62	23.1545	401.13	99.436	282.121	1091.18	1012.27	401.235
K03588	1999.01	1275.35	1717.61	178.692	456.141	657.413	784.538	153.941	1399.58	1317.97	668.817	865.388	856.685	354.313	1049.91	681.158	712.721	615.226	909.392	544.217	148.73	2580.98	1751.26	4577.56	2472.25	2497.07	1477.67	1683.26	2567.64	667.422	2883.13	1624.07	47.1819	147.94	1167.92	2410.49	622.262	175.672	222.878	975.689	1774.16	2601.53	56.2287	366.145	170.026	716.989	819.28	884.21	545.323
K00528	2101.92	1398.8	2315.55	609.553	1174.32	1027.14	1353.77	258.252	1319.01	1453.68	1087.56	641.07	558.843	492.15	2174.39	1041.25	857.292	695.954	156.933	443.841	332.621	961.767	991.487	4720.24	3020.65	1337.25	1278.87	1151.06	2634.2	425.665	3049.75	1346.1	78.1972	262.474	1162.13	1904.11	1453.28	79.1987	112.689	688.792	1194.34	2619.64	86.6334	619.04	372.764	1136.3	749.801	1081.57	723.55
K06215	2440.85	4718.06	4850.19	606.898	250.619	913.743	618.349	154.079	941.593	739.437	1238.23	66.3829	180.521	604.123	1511.03	637.264	1426.28	657.633	71.288	357.935	47.2634	409.537	1115.56	2275.68	3228.07	4309	2008.89	3497.07	2943.32	53.3179	1368.86	623.781	37.1007	211.909	824.835	2856.6	1241.32	11.8542	181.445	299.111	1460.06	1563.66	32.095	188.983	198.744	1078.98	263.378	386.087	409.533
K07138	2440.91	1295.31	1486.32	297.984	225.277	1107.72	808.364	152.492	1120.85	1215.55	718.191	1150.52	873.546	794.626	1018.16	570.888	786.497	706.251	756.815	362.838	220.964	0	956.88	6515.56	3164.57	1719.7	1343.25	1182.39	2893.77	581.451	2607.42	1536.1	60.1755	222.125	924.958	1818.42	1917.06	101.22	149.417	857.061	1532.94	3483.78	65.7958	320.818	227.157	761.72	792.608	848.382	678.324
K05515	2104	1569.63	2042.34	130.237	611.167	566.204	1756.1	261.15	1023.96	950.596	462.523	1025.27	850.297	99.9835	878.952	562.056	797.4	782.527	943.195	547.356	148.878	1951.74	1914.9	5041.19	2317.79	2348.24	1681.46	1472.72	2339.37	1160.4	2801.75	1684.46	53.624	127.811	1036.83	2550.95	888.117	184.874	280.741	1082.46	1841.15	1982.74	32.6881	209.952	117.953	291.65	1018.77	927.505	549.041
K03976	1762.12	1198.07	1569.37	338.493	540.279	795.007	1394.4	256.231	1533.65	1292.3	728.559	706.408	881.04	533.388	1035.32	617.636	547.481	346.194	1006.25	490.59	101.031	2817.03	1550.68	4016.36	2378.13	1630.89	1463.31	1328.18	3064.15	711.054	3935.57	1822.84	47.866	204.781	1490.42	2630.17	1213.91	154.397	151.834	753.323	1496.43	2490.74	77.4711	446.86	221.486	649.778	889.01	923.102	480.788
K01243	1934.96	1172.2	1676.39	249.962	623.149	786.515	1454.21	299.491	1905.25	1461.78	778.47	224.529	305.626	314.988	710.49	431.646	860.974	449.793	35.27	417.129	38.3996	1474.02	1291.77	5115.64	3074.06	1689.42	1100.85	1596.1	3388.34	416.98	2986.64	1147.08	57.3735	204.47	1432.66	2568.58	1391.33	145.626	187.217	854.798	1734.54	3491.5	38.1815	98.6785	151.687	600.264	797.68	834.223	531.07
K10254	2258.26	1768.77	1956.82	771.713	318.268	1225.31	1386.5	306.839	1178.92	1221.27	991.271	109.939	287.148	1481.13	1305.26	738.888	938.073	451.557	79.9446	250.149	119.82	805.364	1015.09	3432.8	4239.34	967.722	1198.38	1506.47	2543.16	91.6653	3275.51	921.777	56.4958	162.292	1165.34	2315.22	1980.8	76.5853	131.828	565.874	1041.62	2942.77	64.1204	1361.51	254.617	554.45	852.582	1159.99	988.946
K00858	1915.12	1181.74	1442.42	313.638	648.264	663.376	1563.42	324.315	1500.28	1390.87	781.326	979.158	937.605	297.008	1081.7	759.736	601.367	527.544	1077.3	532.246	119.524	2842.01	1550.03	2541.83	2087.32	2207.24	1451.52	1466.63	2398.44	1089.08	2986.95	1950.58	73.4376	124.353	1163.83	2307.22	1102.45	143.563	152.547	854.405	1596.44	2366.76	45.5207	201.975	118.741	482.442	956.515	1107.06	516.058
K01814	2021.76	1203.82	1549.52	359.304	417.705	756.078	1273.88	235.024	1233.36	1130.12	767.974	669.867	762.47	386.787	983.702	520.492	632.546	265.8	903.393	475.827	115.212	1702.87	1717.65	5306.02	2928.43	1924.66	1231.52	1396.92	3391.38	619.927	2967.25	1620.89	52.465	149.693	1211.53	2369.01	1213.77	151.778	199.627	1057.1	1743.72	3080.52	26.3977	74.0524	96.6188	668.221	791.464	880.961	529.608
K01579	2782.71	4051.61	4024.88	191.525	818.578	653.918	1269.52	176.425	664.944	673.113	810.493	910.814	536.126	242.298	613.336	513.604	613.192	114.724	776.667	546.528	269.772	1809.77	1485.64	534.638	2694.58	3419.88	2299.14	2095.75	1980.89	1081.39	3283	1893.51	65.882	242.703	1139.32	3968.65	1105.73	63.1202	244.844	516.515	2036.52	1390.49	60.3118	389.892	231.581	325.38	688.328	668.037	292.35
K02914	2397.65	3975.35	3808.74	307.175	174.693	543.952	34.2373	23.4237	484.186	573.702	822.205	604.673	869.704	163.74	1037.77	566.172	800.229	396.371	171.409	458.373	220.823	885.478	1233.09	1206.89	4054.3	2966.86	2354.57	3876	4028.76	20.0238	2849.31	2380.49	31.2312	175.714	1077.59	3044.17	27.0251	56.4413	254.89	481.919	1875.97	2461.04	50.3606	577.357	494.542	564.872	353.986	432.324	336.426
K01585	2651.07	3880.22	3538.57	49.9745	642.725	500.342	1086.09	103.199	145.719	346.936	812.533	1313.8	882.091	80.0452	1043.89	637.932	839.629	155.874	721.387	424.533	101.451	678.964	1273.84	476.369	1602.33	3616.52	2740.26	2452.01	758.537	1510.83	3642.51	1975.95	53.7259	201.976	1264.63	3516.37	989.822	138.227	275.602	577.652	2444.57	1993.34	51.0457	509.143	145.765	670.86	685.839	777.169	263.942
K02113	1232.08	1075.62	1464.85	190.651	703.065	659.97	1258.39	238.616	1816.99	1797.55	798.56	577.119	490.009	280.145	1181.68	530.017	605.108	463.942	825.262	378.159	59.5621	3241.66	1559.99	3852.97	3361.25	1891.54	1006.23	1584.45	3852.65	374.587	3143.82	1158.01	26.2754	149.157	1123.35	1889.5	596.327	136.294	193.319	957.087	1542.36	2281.44	40.7795	68.4966	95.936	905.934	824.644	1262.62	592.955
K00788	1843.44	1303.75	1699.72	322.301	685.435	811.343	1422.39	255.805	1146.96	1222.04	703.058	1077.24	857.685	328.403	907.023	544.576	621.041	525.698	1591.28	542.676	136.995	2004.34	1659.36	3313.89	2827.99	2384.42	1466.34	1150.51	3568.95	667.219	3109.57	1426.86	36.0414	134.721	985.043	2554.87	705.773	196.835	231.02	1095.93	1824.33	2120.17	34.1484	140.254	94.7761	446.428	1102.02	1359.88	621.698
K00003	1561.06	1247.73	1847.73	354.501	194.287	921.899	1194.49	305.659	1968.85	1673.5	1012.72	456.364	865.466	422.489	1628.78	696.975	749.998	473.86	823.377	355.642	125.337	2262.35	1424.22	4304.25	3557.41	1532.12	1117.73	1484.13	3185.08	353.08	2827.57	1155.11	58.044	153.947	1005.52	1964.12	1300.63	101.034	123.37	693.536	1120.77	2839.11	49.3177	331.571	200.73	826.509	669.67	1131.96	549.71
K01804	2265.42	3580.67	2689.66	326.06	800.11	256.406	1505.94	269.665	513.526	638.219	1246.2	347.795	266.095	270.216	1322.21	910.597	942.998	140.06	38.0905	400.538	43.352	996.813	1282.16	1087.61	2948.13	3512.63	2123.2	1502.73	1635.63	693.382	4255.67	1546.2	54.6827	209.688	1263.73	3521.85	1871.14	100.914	237.611	397.839	1886.42	2195.88	22.7182	89.5043	52.8461	241.504	848.057	885.213	292.067
K07173	2166.47	1463.76	1900.12	226.037	649.445	610.257	1473.01	240.889	1606.02	1403.94	833.027	730.716	221.084	433.707	1415.91	816.715	645.337	344.295	65.1756	378.483	69.2942	1693.37	1025.39	4245.18	2910.13	1434.81	1258.14	1648.26	2838.9	641.117	3523.5	1359.53	58.9402	180.838	1479.06	2231.57	1515.97	130.411	181.466	734.708	1755.56	2931.58	32.4287	138.559	134.801	440.999	856.774	931.914	416.232
K03664	2089.57	2102.43	2531.63	159.273	634.152	738.697	960.629	129.603	1233.29	1244.32	719.738	505.862	647.286	533.782	903.361	522.976	727.236	439.58	549.047	422.205	195.424	2386.89	1388.21	2786.91	2762.41	2157.17	1537.09	1909.51	2612.58	546.242	3358.29	1635.06	107.914	260.711	1491.77	2886.29	932.266	108.816	177.377	622.59	1365.49	2256.41	34.557	361.246	321.629	935.927	623.901	723.242	405.073
K02039	1645.73	970.091	1359.86	349.057	776.72	1023.28	1294.18	215.605	1766.95	1439.46	740.406	789.095	850.6	300.014	1056.98	562.297	821.401	363.32	1493.46	450.266	87.1766	1798.29	1021.13	4479.07	2538.81	2238.67	1297.13	1276.41	2861.81	559.285	2688.96	1509.07	53.1483	117.672	951.978	1989.72	564.683	120.465	138.692	811.909	1660.14	2912.18	42.3196	158.943	135.457	599.941	1070.29	1217.23	664.122
K00561	10291.8	12967.7	10076.7	54.5364	51.3894	212.927	1023.02	108.058	90.378	70.1399	100.535	123.506	28.4542	38.5206	1723.63	508.778	344.325	10.7839	15.7928	88.9206	23.2269	994.531	362.98	41.0746	841.046	498.395	885.275	1594.46	907.447	917.222	3557.56	1903.02	11.4669	34.5603	1103.41	2807.38	1080.22	0	60.8316	156.937	244.756	83.6191	0	12.5738	19.8937	72.8716	689.805	605.357	242.656
K01223	1783.38	1174.48	1011.82	169.987	1656.71	409.16	1777.62	360.2	2851.25	1832.72	981.85	37.1675	197.588	1002.27	361.607	241.57	441.458	48.3217	37.1277	398.419	67.5881	6574.67	1086.52	2844.48	4850.32	844.59	689.418	2597.21	4081.18	229.455	1224.58	470.215	97.0749	200.537	1135.51	1566.5	1781.17	138.549	141.404	756.152	666.855	2669.8	38.1619	40.7091	61.7673	244.044	274.884	382.663	476.642
K01193	1603.08	1229.93	1834.82	274.566	43.2751	776.598	1401.62	357.786	2794.54	2325.18	817.351	57.5585	182.211	766.594	538.105	251.759	783.712	296.333	0	375.638	35.2921	1284.77	1059.11	2517.69	3591.99	1362.66	811.157	1884.15	5318.99	158.775	2606.26	878.146	67.8156	189.944	1549.32	2139.89	2027.74	53.5847	62.7585	620.062	1168.27	3279.7	37.956	58.3341	107.974	700.503	633.579	940.283	691.001
K01685	2308.51	1948.43	2553.85	356.136	763.736	768.548	1885.63	199.212	1013.53	931.149	886.549	564.798	344.805	234.967	781.666	636.705	790.881	743.315	51.067	417.864	58.7385	1010.3	1508.27	4797.81	2468.96	1981.38	1375.03	1478.78	1905.84	772.705	3125.5	1395.45	56.0441	253.674	1613.6	3643.08	1431.55	148.366	255.202	744.56	1557.55	2515.05	54.5769	124.262	129.771	501.664	816.247	759.8	459.144
K01996	1910.78	1331.4	1617.91	402.661	995.7	1079.74	1097.99	206.263	1528.13	1501.11	729.062	217.332	345.791	510.526	983.518	663.52	826.551	540.259	31.3371	353.406	231.038	2432.64	1398.01	4190.26	3310.29	1483.82	850.949	1565.17	2724.56	160.352	2457.09	877.481	82.3951	215.46	1398.11	2247.78	1549.64	83.2779	148.773	575.913	1053.09	3314.47	64.1572	619.867	237.439	930.396	454.481	609.791	686.087
K00800	1700.34	1204.03	1346.58	257.444	507.993	660.756	1195.72	229.369	1777.21	1566.89	694.138	574.278	729.444	282.812	989.603	489.606	658.25	612.081	868.707	430.682	139.38	2438.51	1797.43	6677.73	2363.12	1589.84	1120.3	1399.92	2651.9	445.08	2671.76	1283.1	58.8563	124.556	1007.68	1977.37	880.3	153.792	188.915	850.531	1554.21	2223.91	17.3495	78.0697	77.4586	635.871	856.56	1071.36	526.587
K03402	1830.86	1140.2	1494.03	225.929	637.825	439.248	1568.4	227.99	2756.84	1988.26	785.021	467.204	306.406	308.83	778.343	554.953	551.332	295.401	39.8708	527.594	40.3945	4077.13	1757	1780.67	2069.88	1580.02	1248.05	1577.41	2401.14	865.78	3332.54	1617.36	72.5317	128.629	1616.9	2678.96	939.706	166.411	256.307	800.038	1639.74	2500.38	22.3507	142.711	70.1307	434.743	871.233	842.761	353.386
K04041	2414.56	1965.97	2626.52	240.276	143.281	676.789	1803.45	326.701	1423.9	1464.69	563.435	283.738	242.253	186.266	806.778	431.048	638.37	524.021	39.3192	433.505	52.8498	435.554	1217.87	3035.62	2842.75	1998.63	1487.08	1550.29	3439.2	822.004	3740.96	1505.89	43.5729	198.015	1331.61	3360.41	1395.69	132.333	216.42	831.584	1578.98	2202.92	31.8819	95.3829	77.248	504.363	946.206	991.679	463.071
K05970	3417.9	1979.13	1148.08	54.7007	32.6161	342.094	1021.77	172.954	284.946	389.295	836.216	1243.09	759.875	60.1667	1237.69	804.505	315.97	295.149	772.402	420.653	40.5458	0	1886.24	695.611	372.534	3514.07	2458.09	931.395	672.963	1064.64	2916.21	2049.91	0	0	1014.28	2198.91	889.779	192.603	371.881	754.916	2698.65	2125.78	17.9704	54.3787	24.5697	407.061	1237.58	1174.57	223.013
K03216	1880.18	1498.69	1797.09	351.806	1039.21	863.461	1317.55	199.428	1889.47	1706.64	1065.54	217.522	389.217	847.298	977.791	514.237	741.446	301.595	538.06	393.977	137.883	3093.89	1353.02	4123.63	3574.67	1375.16	879.75	1626.04	3439.59	139.539	2735.66	730.458	79.5831	241.002	1223.24	2100.81	1785.7	86.5877	157.934	678.235	989.973	2602.06	46.2506	169.035	134.094	646.098	598.252	934.689	576.764
K03296	3615.46	2583.3	2001.59	17.2343	70.1258	429.206	1025.23	83.5978	243.908	148.91	615.755	1190.41	917.789	38.8166	1177.18	798.11	331.485	350.514	1430.21	545.74	60.1327	884.668	2074.74	165.856	414.924	4084.04	2758.86	921.045	359.092	1216.03	3362.91	2608.03	10.7224	36.6154	1299.62	3958.95	965.155	210.462	320.551	657.802	2915.12	1858.74	19.6184	91.0708	24.2837	134.604	1449.04	977.384	144.523
K07646	2658.56	1426.33	1688.46	200.33	556.997	904.274	1569.67	256.196	765.108	853.739	824.22	821.765	845.634	357.424	914.75	547.856	779.69	525.592	1482.57	424.075	109.694	599.417	1275.96	2736.32	3113.14	2549.31	1349.75	711.908	1684.13	773.623	3680.35	1842.68	72.2713	207.362	1392.99	3088.01	1610.71	179.366	218.361	833.91	1593.43	2578.65	27.3555	74.9721	50.2865	247.761	971.673	996.726	556.979
K03572	1940.02	1545.96	1740.67	159.256	745.079	713.511	1346.78	256.358	1977.17	1545.63	608.661	841.942	847.161	415.015	1162.63	654.785	618	461.436	768.75	516.81	194.483	2973.4	1674.36	2579.46	2164.99	1933.37	1584.87	1538.3	2291.22	993.23	3058.98	1826.69	59.692	146.67	1294.26	2456.6	1041.77	139.439	208.89	730.144	1461.42	1614.75	45.0488	308.567	210.298	585.952	840.649	990.844	461.667
K01657	2093.87	2213.43	2243.96	333.334	582.015	570.42	1349.79	227.469	1591.25	1192.42	2093.69	569.152	586.055	424.774	1248.73	751.452	842.996	292.721	833.814	535.682	117.377	2741.3	1815.17	905.372	1905.08	2847.65	1658.73	1674.74	2160.85	805.365	2937.76	1396.17	69.1406	118.206	1201.83	2475.57	860.956	82.101	120.867	435.989	1633.08	1981.58	37.0179	158.561	97.8068	573.195	943.759	925.827	379.981
K01989	1776.13	1205.88	1817.69	336.418	105.298	1087.65	1277.19	300.441	2624.03	2339.67	568.087	7.2477	159.149	293.295	1244.74	602.136	675.915	466.338	7.83049	309.641	25.7206	4252.11	2080.95	3629.57	3881.2	759.726	657.928	1312.1	4522.46	82.7847	2692.51	716.279	79.2004	241.237	1264.33	2038.17	1757.97	106.32	153.802	882.154	883.324	2346.88	36.0574	114.997	95.9268	701.048	596.298	924.533	604.985
K07090	1794.82	1005.48	1807.09	474.346	572.36	801.731	700.37	98.3203	1362.44	1452.14	870.839	100.349	213.812	498.944	1142.72	602.307	1017.95	619.345	35.4386	305.228	74.8339	2905.77	2053.11	5530.94	3806.19	1136.34	810.36	2005.4	4743.2	37.6773	2285.57	894.529	77.2988	221.869	905.289	1773.59	646.39	132.444	167.923	935.598	1149.3	3332.72	38.0261	116.199	119.579	525.657	611.646	979.412	564.393
K09457	2909.72	4572.76	4232.1	105.323	31.0091	370.449	967.539	105.096	331.597	161.946	391.099	472.768	299.774	222.055	523.413	318.427	557.955	28.1015	664.745	276.287	19.4116	1868.72	2002.35	430.156	2715.48	3883.5	2390.05	2285.29	1252.3	838.886	2980.76	1532.78	53.1433	144.328	1345.46	4498.91	1293.45	93.0662	288.562	343.173	2103.39	1910.33	0	57.623	15.2137	246.865	619.127	495.268	196.936
K00817	1811.86	1407.95	1486.49	287.921	569.533	492.583	1475.72	255.982	918.512	984.398	670.828	432.581	548.627	342.667	968.172	556.554	544.744	185.312	748.817	461.892	89.4459	2388.03	1899.33	3746.81	2716.1	1965.66	1338.3	1477.97	2748.84	687.36	3213.01	1760.31	64.995	149.045	1080.85	2912.67	961.295	171.226	206.376	863.126	1862.72	2647.05	29.7869	90.3634	76.2474	616.285	776.547	912.193	510.131
K07114	2482.26	2031.11	1855.53	99.5881	68.9846	349.344	1314.96	166.415	202.567	452.942	756.584	1254.72	913.771	349.513	1099.23	648.571	760.265	322.942	585.66	469.285	250.331	139.838	1341.83	944.248	539.011	3324.12	2505.08	1844.77	868.321	1786.54	3988.55	2896.56	6.39909	80.6469	1281.77	3600.5	782.993	169.036	258.958	635.046	2245.75	2239.29	59.8066	417.884	173.058	823.549	889.79	757.399	361.482
K01834	2176.68	1253.66	1198.09	168.083	577.668	235.156	1495.31	267.273	1344.57	753.495	869.576	708.738	448.835	240.163	746.593	538.391	406.401	571.29	266.669	475.833	109.491	2508.38	1234.68	1948.36	1452.47	2015.11	1471.39	1682.63	1104.55	1387.53	2604.2	2297.18	19.2375	75.5939	1130.24	2058.36	1342.71	138.049	197.1	711.779	2252.23	2607.22	46.7425	270.392	312.391	763.29	948.723	641.244	224.529
K01012	2556.15	2198.97	1868.46	350.279	734.754	858.16	1680	343.609	1095.44	1217.05	735.98	486.841	565.332	639.418	1278.75	748.003	662.612	175.604	886.454	441.895	54.4524	3898.63	2480.67	505.013	2829.83	1745.04	1753.19	1249.52	3771.34	480.781	3284.55	1290.04	74.4059	132.473	932.266	2263.21	1392.95	95.086	141.035	585.381	1746.46	1749.18	39.6188	56.5692	49.2114	493.902	947.135	1330.35	486.79
K03687	2067.36	1777.97	1839.23	203.167	629.318	576.867	1309.29	200.751	1413.63	1250.74	573.366	595.453	481.318	250.906	1031.15	495.806	702.719	460.294	683.957	390.874	121.476	2862.04	1793	2646.65	2574	2337.83	1395.25	1618.78	2222.62	939.136	2810.88	1589.32	61.4131	133.454	1170.69	2409	833.036	93.2357	228.031	835.725	1675.75	2401.98	37.6098	112.38	119.014	624.184	798.214	820.67	467.39
K07284	1103.09	1246.91	1245.17	318.874	38.4954	441.221	1418.06	419.079	1430.53	1493.66	1072.58	0	105.886	377.232	891.644	374.022	949.715	342.908	0	263.235	0	2238.19	713.427	4674.02	2636.64	2111.47	713.258	2166.6	3616.98	94.0601	2860.3	701.938	31.4351	122.76	651.123	1213.92	800.1	79.2282	160.87	1022.66	1555.14	3853.47	49.1204	107.518	55.9999	753.028	660.631	972.25	479.013
K00616	2353.47	1985.19	1861.83	352.968	1879.82	212.997	1380.52	244.417	958.143	1053.69	958.534	866.004	737.61	348.043	1045.64	670.129	412.789	432.376	384.153	635.28	222.788	2918.75	1291.73	1034.55	2777.47	1911.66	2034.6	1303.92	2799.54	1489.31	3392.08	1915.26	81.2171	170.589	1150.3	2174.09	1044.03	96.2	110.077	709.283	1480.92	2225.46	47.4637	301.568	132.714	320.847	980.374	933.223	260.175
K07301	2244.37	1127.31	1995.09	606.018	591.133	859.241	1333.2	198.182	1096.36	1127.83	915.051	460.432	455.833	386.35	1490.44	937.245	735.653	484.751	98.566	611.003	162.453	624.654	905.058	4128.98	3373.06	1082.47	1510.87	1163.49	4379.25	579.215	3905.67	1529.34	55.1842	175.635	1150.93	2601.32	849.731	119.453	178.986	695.916	1451.54	2076.55	52.7043	172.61	160.508	395.295	1297.75	1314.47	697.016
K03437	1758.97	1261.04	1469.75	257.228	34.045	456.434	1242.58	231.67	1901.46	1478.1	758.931	431.93	352.408	309.718	780.422	375.837	597.913	472.977	74.4569	370.178	93.375	1848.66	1356.91	7954.63	2744.22	1297.42	1182.86	1283.76	3013.7	397.827	2631.95	1472.06	37.9023	136.238	1010.91	2132.94	1135.98	143.576	174.762	853.854	1565.07	2800.1	51.3463	166.76	125.831	691.212	580.367	653.895	446.178
K11753	1795.65	961.321	1335.81	249.787	653.779	684.014	1485.35	276.007	1664.51	1538.72	714.216	615.737	501.855	332.585	853.32	387.699	641.851	539.278	730.833	287.327	49.0386	2921.84	1655.02	4638.88	2453.32	1711.85	1054.14	1262.43	2500.8	435.92	2519.67	1335.84	56.3808	163.757	1190.02	1833.77	1151.96	129.539	230.956	893.647	1502.53	2598.98	24.9731	98.9684	81.3142	652.892	654.057	1066.71	609.76
K01972	1928.32	1763.76	1555.4	367.626	1512.49	558.784	1551.39	301.318	1478.85	1217.14	827.805	986.456	877.689	341.133	1099.94	647.524	570.837	404.236	857.908	567.335	258.97	4036.31	1589.09	1281.41	1829.25	1939.32	1422.66	1615.32	2164.99	1091.22	3015.88	1749.26	85.4153	129.429	1179.03	2122.7	1085.34	103.344	95.2406	482.485	1428.1	1822.44	50.8555	380.073	237.594	766.194	804.291	1005.47	428.55
K02226	1671.34	828.529	1673.57	207.662	546.334	815.398	1358.15	249.629	1440.27	1512.89	452.679	116.167	183.575	136.201	1282.13	647.574	627.049	822.352	0	359.677	36.9763	2051.23	1634.53	7206.3	3300.44	873.355	824.78	904.492	3328.39	430.572	2688.92	1091.39	78.0079	291.575	1273.25	2151.52	1487.81	160.241	212.19	1148.92	1507.36	2865.88	28.2983	93.6117	145.201	662.565	777.23	992.078	637.094
K00941	2271.95	2335.84	1913.75	433.962	629.38	817.237	1494.4	222.952	1033.47	1205.4	717.547	682.942	499.916	624.52	926.795	513.164	667.879	553.192	658.039	485.65	157.151	2399.61	1756.64	3376.49	2678.69	1469.12	2004.26	1338.58	2692.13	442.007	2587.56	957.121	65.2964	114.289	929.198	1881.28	1092.78	123.403	160.627	696.534	1431.23	2303.91	30.2113	197.181	99.5098	588.169	1032.95	1369.93	534.945
K00981	2236.56	2070.52	2152.55	184.333	915.634	613.809	1188.22	209.487	1533.49	1209.27	618.825	482.627	439.573	283.488	832.901	493.301	615.133	335.475	441.537	378.017	76.6534	3068.7	1739.36	2302.63	2503.76	2172.16	1482.96	1695.19	2146.63	424.196	2860.13	1463.54	76.9856	165.015	1437.77	2557.44	912.067	140.767	266.078	675.318	1458.9	2282.15	20.6408	105.396	104.761	519.99	872.816	974.439	425.338
K03340	2967.04	3735.96	4030.65	98.166	213.732	476.407	741.773	83.0293	178.511	222.052	452.952	840.613	719.178	147.397	854.39	535.917	713.982	316.498	987.396	343.778	156.426	1463.67	2134.9	511.26	1749.82	4662.47	2550.26	2333.49	850.357	845.558	3136.74	1292.85	41.8902	184.562	1181.18	3834.43	1559.64	111.389	269.771	311.87	1802.84	1340.28	14.9582	46.1984	36.5515	306.011	784.284	615.769	157.906
K01533	2617.06	1842	2072.78	621.09	220.842	1071.18	1214.57	205.251	1124.68	1204.62	850.893	863.605	485.085	450.38	1097.36	590.69	1001.48	677.874	173.66	446.841	266.933	335.849	958.176	3924.02	2582.31	1474.06	1475.03	1535.05	3178.97	657.514	2815.86	1724.14	40.2203	162.341	1000.17	2414.79	1132.72	141.231	183.215	838.925	1628.26	2066.46	42.3561	598.687	234.487	597.531	932.239	955.633	692.259
K01912	3363.22	1799.13	1575.41	309.868	209.243	266.82	1262.83	131.302	433.61	524.361	689.593	959.683	515.623	281.755	1434.92	950.229	574.373	1006.3	193.825	696.84	155.481	675.798	1358.01	315.2	827.089	2234.03	2265.1	493.471	339.178	2395.31	4692.02	2891.58	27.339	17.9	1537.41	3092.35	987.321	165.088	284.603	545.538	2592.06	1904.22	39.0921	139.967	62.1431	510.863	1347.16	1001.37	426.702
K00791	2111.51	1709.23	1446.32	151.061	790.447	439.437	1243.38	220.9	1281.18	1078.99	834.363	963.01	817.905	254.023	1022.33	593.627	408.362	294.882	955.438	582.971	99.1117	3059.83	1660.53	744.871	1384.57	2569.61	1887.72	1610.8	1632.55	907.19	3478.61	2094.3	35.75	83.4618	1362.49	2913.72	956.953	127.699	160.088	472.861	1991.2	2047.88	17.1676	92.6494	38.5065	442.324	1028.06	1069.07	284.889
K00620	1488.67	978.8	1596.08	404.759	148.111	1245.38	1119.44	253.594	1533.09	1542.87	734.439	222.545	574.54	369.129	865.103	412.781	787.546	542.08	837.961	307.726	107.755	368.855	830.609	6914.33	3352.76	1495.82	711.629	1393.12	3528.76	143.39	2638.56	750.617	46.3827	214.412	1092.84	1918.67	1486.79	89.1863	143.566	733.027	1112.84	3150.34	35.8456	169.935	155.035	961.203	652.096	1053.13	749.965
K06861	2235.56	4267.05	3888.52	44.2953	568.905	363.81	1177.55	78.7001	93.2789	127.832	284.943	998.855	1133.68	29.5245	743.206	480.844	524.183	246.802	954.897	488.784	196.206	2056.63	1863.18	404.839	1159.27	3722.08	2743.52	1873.22	565.067	1480.82	3139.83	1785.48	68.8502	222.835	1245.29	3809.06	1217.65	105.785	286.363	481.138	2202.62	1035.84	37.4027	463.361	216.048	301.62	612.949	517.1	162.256
K03625	1851.37	1204.81	1558.28	161.942	562.766	558.257	1402.55	247.356	1443.36	1209.78	664.195	545.723	662.528	242.02	876.274	419.977	534.84	309.789	890.54	425.408	98.1147	2821.65	1484.13	2417.49	2186.73	1945.61	1255.26	1419.74	2351.02	994.869	3749.17	1893.35	29.9765	83.5719	1383.92	2571.4	864.725	156.89	216.568	778.688	1609.7	2525.73	26.4803	207.13	124.046	491.574	726.638	754.341	371.772
K06950	1810.75	1448.88	1323.15	246.915	522.426	435.623	969.448	190.503	1713.4	1182.88	965.331	451.723	322.993	358.797	1027.33	564.618	571.242	343.68	40.1274	305.195	41.8891	2189.48	1311.47	2528.1	2129.35	1999.9	1425.33	1647.65	1830.49	618.136	2348.08	1876.28	48.1216	120.224	1225.22	2194.89	1005.55	142.193	234.354	777.061	2358.72	2956.49	52.1753	94.613	49.2407	547.002	678.594	717.887	402.448
K03631	1720.21	1489.88	1650.11	220.2	644.511	782.413	1267.49	245.436	1550.93	1408.56	751.073	786.96	912.66	336.526	965.486	622.481	682.557	504.474	1144.82	489.21	163.754	2541.96	1476.33	3158.85	2257.78	2032.91	1202.45	1562.14	2415.34	559.982	2833.6	1390.29	64.5818	128.94	1219.9	2272.1	1016.79	95.673	181.411	714.12	1369.1	2159.64	44.9955	207.719	155.674	670.42	749.846	816.06	409.36
K00971	3122.28	2000.58	1576.62	91.8991	489.388	317.592	1191.6	93.5769	271.526	232.879	525.881	1281.27	788.088	68.5481	992.893	634.689	229.016	185.004	880.342	409.773	118.196	665.435	2164.31	276.335	1035.06	2841.66	3429.42	981.888	970.4	1325.24	5377.9	2206.04	52.1491	50.8295	1809.28	3403.15	1991.26	184.791	243.11	820.905	3039.99	1588.66	30.3534	238.385	81.3817	230.899	1018.56	862.525	199.355
K07238	1737.56	1266.65	1467.39	843.725	569.416	1995.91	697.841	177.401	1130.34	1602.6	801.865	612.665	835.198	668.811	1549.01	879.99	1204.31	827.773	900.014	510.478	401.626	868.917	577.039	3153.12	2767.12	1181.08	1065.55	1239.98	3220.37	320.163	3169.83	1252.89	58.827	143.515	1198.51	1807.9	800.321	41.7531	99.6343	557.591	1027.93	2018.05	72.7094	1218.83	381.446	1450.19	1026.11	1365.02	1453.06
K11717	1861.88	2175.9	1981.25	287.051	572.656	612.887	1124.31	127.991	973.998	637.519	905.395	1131.11	845.027	360.969	742.726	539.978	718.032	493.477	1034.58	463.634	177.399	3307.12	1806	976.167	1104.36	3167.87	2066.56	1841.7	1245.68	952.388	2917.13	1607.39	64.0596	160.885	1436.13	3236.49	913.339	92.9487	158.281	477.071	1720.48	1634.73	39.4309	251.165	114.241	330.523	890.244	704.311	373.447
K01571	2471.59	1960.66	2443.77	558.183	556.393	979.441	1572.61	320.286	1110.81	1364.57	833.608	257.675	690.622	392.561	2288.56	1002.7	717.088	347.547	843.425	326.484	138.272	1706.54	1682.25	1992.22	3872.17	1353.18	1401.55	940.055	2466.51	192.033	3518.74	913.007	74.202	221.575	1068.82	2336.25	1982.39	75.3887	104.851	607.231	816.219	2237.05	23.3872	71.3137	87.7261	462.356	1008.95	1264.5	604.712
K06881	2002.5	1095.9	1462.76	138.694	44.4937	748.236	1256.24	244.744	1567.08	1417.16	408.805	807.483	795.328	212.428	1084.99	551.959	613.486	542.587	1001.86	519.018	92.8103	1920.23	1545.87	4576.81	2199.14	1705.93	1316.88	1019.41	2015.31	1064.34	3469.26	2008.65	27.2846	105.569	1098.85	2301.58	989.474	155.313	181.833	908.091	1515.52	1926.65	41.2281	287.572	158.201	638.008	891.789	965.528	515.267
K07496	2642.02	3058.35	1927.49	158.201	1303.32	171.691	928.872	254.125	604	863.169	694.531	20.4121	27.657	907.082	177.629	155.176	134.564	0	12.375	198.919	21.0972	2583.14	547.679	253.706	3289.94	419.776	705.739	4696.83	4178.96	138.783	2252.27	837.164	91.9403	109.949	893.172	1645.55	1220.87	22.8477	20.7283	356.26	557.169	1345.99	20.2064	50.5273	10.9861	53.902	775.943	795.221	137.092
K02371	2117.88	1448.6	1734.35	399.44	228.192	967.843	850.029	191.665	1897.36	1546.41	778.599	447.164	610.947	328.218	1641.83	839.645	752.688	603.786	116.049	437.683	172.883	1763.91	1366.69	5008.12	2854.66	1262.05	1347.59	966.119	3261.82	392.602	3014.22	1332.38	53.0587	199.523	1095.73	2374.43	824.798	113.841	187.796	714.164	1356.64	2399.56	36.4569	153.041	122.914	747.228	914.13	1162.25	540.325
K02907	2367.47	1665.03	1983.65	308.431	407.902	848.323	86.299	28.199	1473.93	1544.02	783.515	383.18	469.031	301.17	1597.76	675.487	594.744	400.117	41.617	419.383	103.176	2321.26	1337.1	2659.2	3761.86	1412.47	1221.75	1871.13	3006.13	44.7925	3727.54	2027.07	56.4974	164.65	1635.06	2676.57	101.049	134.436	150.226	575.105	1574.24	2681.55	16.8244	352.492	227.264	852.745	662.866	805.355	512.92
K01200	1574.69	725.227	1329.97	219.27	16.4893	456.115	1393.57	323.864	2511.17	1950.01	707.714	201.067	250.434	142.073	1119.53	522.238	616.135	544.058	54.8034	337.566	59.6072	664.332	922.762	7139.83	2439.74	1652.98	985.56	1169.35	2508.74	806.406	2545.37	1223.91	20.4294	115.576	840.319	1474.07	599.498	153.301	204.764	864.106	1473.75	2732.8	24.578	107.676	76.9119	531.915	844.071	1068.06	531.401
K01126	2418.8	1129.13	1043.61	72.5778	877.599	257.766	1303.87	223.576	698.576	743.861	442.172	1101.23	755.235	207.474	765.099	485.48	466.474	506.042	168.911	539.43	198.637	2448.88	1314	1737.98	2253.03	1795.21	2218.24	1809.91	2546.94	1176.17	2748.63	2659.58	100.734	107.626	1154.52	1775.64	1044.93	257.323	345.258	1224.45	1329.46	1144.92	12.5731	117.022	53.3879	169.575	898.464	750.58	572.455
K15582	1414.39	1107.46	1493.57	284.116	384.28	1217.98	1248.17	263.211	2008.92	1580.02	517.44	203.465	520.942	259.942	630.783	373.584	666.238	570.176	906.049	299.097	37.3659	2719.38	1424.09	4023.47	3368.89	1537.96	623.659	1291.93	3441.62	110.577	1951.71	630.388	85.2888	256.705	1555.15	2384.22	1710.94	97.6876	149.363	793.82	954.4	2768.76	44.3722	211.438	134.557	483.53	586.563	696.867	496.476
K02372	1715.13	1186.65	1639.44	292.713	852.564	698.606	1407.82	245.322	1809.02	1581.3	591.974	128.125	204.405	213.939	1200.35	633.909	648.867	473.146	40.1895	339.668	43.3542	3284.7	1655.66	4774.4	3356.22	722.005	901.808	1255.73	3224.47	213.768	2963.52	933.46	84.0556	224.486	1112.08	1949.96	985.674	111.21	158.92	698.595	1268.82	2219.17	22.0124	58.3499	118.497	615.015	682.266	1047.88	469.71
K00075	1514.98	1195.94	1205.58	248.849	703.934	588.056	1173.08	216.475	1556.28	1290.32	842.61	648.446	458.627	440.131	842.44	503.568	726.829	630.036	118.21	390.737	122.365	3165.73	1706.8	3692.24	2412.83	1347.24	1211.17	1462.15	2872.04	495.933	2640.21	1357.44	73.9424	155.141	1128.08	1619.19	848.49	124.999	191.666	894.029	1620.24	2090	52.3051	243.443	177.663	786.675	819.821	965.534	477.002
K07095	1792.71	1517.31	1399.95	203.392	565.845	439.202	1155.08	220.57	1172.34	1244.82	578.685	1082.4	827.084	246.113	1223.11	656.325	410.122	511.983	1090.93	555.917	187.007	2981.89	1743.54	1545.7	2973.67	1420.48	1524.01	1027.13	2407.37	1043.81	3695	2137.83	56.1224	59.7599	979.62	2304.12	772.726	115.339	201.811	759.453	1821.49	2355.78	28.4106	239.351	125.267	636.036	917.567	1143.28	593.377
K04763	2223.12	1872.52	1549.1	275.394	675.197	388.827	1185.79	190.836	338.138	595.47	633.023	837.527	712.065	209.422	992.419	613.775	476.375	543.14	750.951	491.665	197.135	1306.91	848.592	1001.53	1962.12	1928.28	2046.49	2219.54	2637.5	845.095	4100.87	1679.55	47.2476	84.0542	1303.78	3950.94	963.211	93.8495	174.016	568.624	1651.78	1832.21	35.9998	256.534	129.313	425.892	752.322	870.903	443.998
K03564	3092.46	3127.82	2266.15	144.957	498.265	99.1867	1714.06	279.329	802.402	856.233	1103.67	573.101	296.471	941.881	1488.04	875.045	284.395	117.764	115.158	474.285	181.759	739.746	861.145	566.375	3562.67	1001.49	2060.41	1137.39	1696.48	1108.01	4727.31	2310.34	76.5536	96.8732	1086.09	2950.87	1806.84	114.756	144.889	582.906	1378.96	1574.25	40.4456	305.903	78.4323	252.44	786.952	637.889	146.629
K13747	2313.89	1695.8	2005.09	170.132	39.9537	734.738	1243.45	198.199	1062.05	990.133	550.837	907.43	977.462	227.264	1100.93	612.482	580.01	498.489	925.237	553.036	204.114	52.2838	890.994	3758.55	2505.06	1740.76	1535.35	1247.98	3051.45	1206.98	3658.98	1850.35	23.4568	118.619	1061.78	2433.18	997.564	167.385	185.813	800.347	1431.05	1978.39	44.5414	401.177	235.502	591.673	904.501	911.868	440.846
K03152	1805.83	1004.26	1598.74	232.087	785.825	949.167	1287.66	222.049	2030.18	1477.21	563.302	625.057	575.691	294.681	884.939	511.568	715.433	684.627	706.088	402.067	59.3186	1215.25	1030.92	5933.4	2617.21	1566.77	1019.11	1277.52	3115.47	478.78	2571.36	1226.98	67.0016	161.733	1044.72	1862.47	859.317	136.825	174.662	830.981	1490.51	2468.07	27.1939	72.4825	76.0247	543.469	921.984	1040.07	524.919
K20074	1401.91	746.671	1377.44	239.874	113.357	706.874	1319.27	349.378	2214.74	1946.43	706.986	69.9221	211.67	522.759	811.48	350.472	786.896	428.44	322.707	282.09	64.3397	2548.8	1795.75	5331.33	3272.6	1620.88	697.698	1476.16	3971.03	114.469	2236.66	798.382	39.6363	97.927	653.191	1129.85	745.879	78.1225	120.815	776.121	1312.64	3424.66	17.7155	90.1682	104.625	769.456	319.336	889.813	545.416
K01421	298.049	316.792	1373.9	417.027	66.5238	544.865	1410.88	439.05	2065.22	1752.4	1483.35	66.9809	154.133	739.02	729.047	368.606	1121.31	444.455	28.0925	266.233	30.6314	1079.52	993.177	3563.08	3353.81	1988.23	638.04	2284.2	4694.67	79.8299	2045.87	582.775	27.6184	112.683	784.625	856.895	518.223	90.7316	112.202	918.526	1407.21	3060.65	49.3779	121.375	130.011	758.156	522.532	983.398	538.499
K01926	2334.85	1271.2	1682.3	124.924	47.011	502.001	1131.51	188.818	1761.98	1509.21	493.858	686.569	506.546	570.647	1339.11	681.357	565.233	435.798	68.3807	416.603	133.999	1179.21	1030.21	2715.3	2501.15	1318.71	1502.62	1120.63	2416.81	1008.09	3432.76	1757.17	33.4236	136.915	1285.86	2803.78	1098.21	163.732	199.834	858.08	1509.65	2136.76	27.9536	349.259	189.485	519.905	685.888	794.539	454.752
K00661	2063.14	1605.11	1492.83	174.886	438.831	399.154	1003.07	183.722	1098.89	999.603	842.741	814.558	643.566	247.309	1048.57	545.058	495.425	151.952	922.425	416.39	70.0353	1626.71	787.752	1187.77	1711.44	2199.83	1512.6	2082.41	2248.49	564.536	2805.15	1854.83	27.4233	63.6251	1060.01	2072.59	1312.51	98.0444	96.2333	579.117	1610.15	2322.88	27.664	72.5158	61.3762	449.202	826.724	1140.5	268.211
K01537	2109.4	1640.3	1411.93	374.975	235.381	830.82	921.348	118.235	1085.55	1164.09	979.623	1110.99	983.746	342.853	2116.25	1075.6	607.647	331.921	1084.51	544.136	228.233	954.261	1034.55	849.13	1732.72	2036.09	1726.89	1359.64	937.771	1146.21	3916.67	2237.62	9.31409	49.5714	1045.31	2411.67	1108.43	106.179	171.349	457.37	1476.57	1349.97	44.6699	666.518	248.343	1035.15	937.698	1252.6	588.501
K03320	1995.39	2219.86	2410.18	434.948	594.291	649.28	952.042	185.473	919.533	1222.94	954.643	380.01	244.807	764.097	3099.3	1390.71	776.411	607.26	98.7386	456.982	65.1006	1110.9	848.467	1060.22	3011.95	1600.11	1559.81	1966.95	2484.58	446.275	3506.05	1547.99	38.2538	88.3503	713.974	1803.05	840.525	51.4042	112.134	422.668	1412.46	2211.15	29.439	91.6184	68.0043	843.507	841.506	1259.02	472.162
K20487	2993.53	2359.61	2137.55	495.392	120.569	359.701	1407.7	277.138	1766.23	2000.31	1310.28	15.0981	104.612	1166.84	1401	583.943	456.351	122.816	22.3574	249.746	115.614	367.117	724.309	3344.51	5934.58	529.307	1203.83	1034.2	2895.43	97.1104	4048.91	1248.33	38.9238	123.525	986.047	2123.31	1441.74	97.7709	131.358	563.402	1203.6	2862.48	8.09545	109.099	66.3462	434.595	397.581	593.838	572.693
K17318	1958.28	2031.58	2809.64	263.838	140.303	397.004	2146.53	474.376	2176.91	1800.25	725.418	4.59383	86.0651	410.81	280.083	122.323	605.567	14.4646	6.24259	278.331	0	984.46	725.279	1287.15	6036.33	1041.62	1127.81	1342.16	4721.01	96.4275	4117.15	729.763	62.0434	225.626	1202.66	2530.55	2035.88	38.5413	31.315	465.369	562.642	2360.93	9.222	45.5555	39.7874	418.298	739.529	975.751	417.291
K12574	1532.99	1252.27	1744.18	391.682	211.183	786.279	993.507	270.977	2935.94	2138.92	880.934	102.961	244.092	364.03	898.957	468.011	654.79	456.153	58.8916	294.524	124.353	2206.6	1121.24	3986.05	2995.14	1068.75	801.161	1431.36	2539.99	112.835	2435.97	676.23	51.4805	195.366	1367.38	2084.96	1534.1	71.67	118.971	607.151	862.607	2614.03	48.4838	237.736	199.786	767.927	501.42	790.685	531.05
K07098	2238.83	1346.4	857.137	282.075	25.2167	1001.16	832.885	85.1192	274.439	1092.6	367.01	1055.1	1240.95	241.776	3830.47	1580.57	428.166	135.222	2802.65	388.311	70.5345	2316.22	1605.11	1054.01	1609.34	2880.21	1396.81	657.979	1048.79	738.066	3797.63	1859.39	9.85819	29.1972	578.321	1482.76	870.579	97.9693	208.652	650.269	1714.56	1492.08	0	56.1239	38.5521	1036.88	1130.26	1751.18	539.232
K05832	1503.36	1251.37	1909.76	289.487	106.238	1100.41	763.631	161.872	2536.06	2212.18	585.431	17.1797	193.342	325.355	1303.75	494.652	672.413	490.083	10.9736	292.372	0	2165.02	1359.49	5072.2	3686.77	848.539	631.997	1270.09	4846.37	71.3093	2598.39	758.349	48.8291	184.911	1127.94	2070.57	1123.29	73.6266	139.201	749.699	790.255	2273.22	46.2211	101.734	152.602	761.371	649.704	805.711	568.386
K00041	2459.03	2178.07	2912.38	108.741	464.026	619.266	1606.09	172.545	702.163	740.764	350.771	328.275	192.187	69.0204	687.918	400.184	571.571	291.67	26.652	283.382	24.4307	880.905	1725.32	2463.79	2770.15	2213.02	1457.32	1334.05	1594.79	509.155	3388.64	1336.53	56.0572	273.023	1552.51	3773.29	1643.48	129.118	286.261	694.795	1559.8	2293.43	20.2694	66.5454	71.7455	317.074	510.063	480.436	308.259
K11752	2195.37	1414.76	1831.64	182.217	724.468	598.178	1558.2	260.535	1100.09	974.779	986.566	431.608	489.186	212.391	525.603	390.75	695.289	283.367	540.109	484.421	249.912	1906.51	1857.15	2002.52	2641.63	2383.77	1241.56	1535.45	3279.76	541.317	2779.78	1074.6	35.9473	104.008	1005.94	2384.08	997.84	141.496	144.765	568.84	1494.34	2558.63	32.0821	88.0673	53.0994	234.271	729.061	738.157	279.614
K00784	2161.95	1736.55	1453.74	268.843	870.911	419.991	1295.99	269.695	1682.22	1331.76	674.157	441.443	411.28	351.273	565.762	352.862	507.417	606.776	105.497	435.665	149.959	1680.66	988.104	6221.13	2848.86	1048.85	1416.47	1177.92	3014.79	477.078	2576.16	1245.35	62.461	137.577	1115.09	2254.24	1013.64	147.471	168.465	825.404	1462.89	1991.91	24.8242	129.585	75.6767	323.489	676.427	651.022	515.308
K01185	2942.46	1253.49	1383.45	40.215	2821.26	270.065	2160.22	156.683	125.703	181.232	469.306	2321.59	1315.72	41.2997	1019.2	781.378	467.374	1222.61	249.535	983.975	282.673	3905.35	1382.97	229.271	830.506	2092.61	2640.01	933.974	712.919	1406.77	3838.15	2243.63	110.593	118.11	1539.81	2648.9	650.175	129.92	232.844	945.739	2131.49	930.031	47.7649	274.021	117.498	250.312	1449.1	816.082	286.108
K07816	2491.86	2571.87	2469.17	341.834	213.157	201.261	1867.85	488.375	1507.63	1239.68	950.426	89.4668	185.98	452.017	755.662	307.037	397.805	35.3957	28.1309	302.454	94.8802	967.162	786.713	709.25	6178.39	1025.53	1637.38	1532.76	3458.17	88.7009	3653.51	802.489	37.0236	103.723	865.114	2441.31	1428.88	48.9483	56.5274	502.173	1256.24	2834.89	10.1885	24.0091	25.1442	66.8243	770.007	877.629	337.171
K12257	2276.64	1932.1	2345.25	122.72	71.813	624.002	1179.17	180.072	826.531	790.581	412.436	866.564	680.64	209.211	785.624	447.675	578.953	376.712	789.012	462.263	137.019	0	1247.96	2000.55	2421.14	2536.77	1796.28	1466.75	2181.47	1217.34	3130.63	1705.11	37.4364	168.685	1200.05	3000.75	1080.22	169.76	252.549	780.703	1680.39	1889.42	36.0126	203.869	119.521	316.988	824.333	718.049	441.112
K00526	1900.79	904.25	1166.16	773.517	1407.7	1185.2	1686.39	263.784	1263.29	1130.86	1002.7	246.516	319.433	261.618	995.209	539.08	857.897	405.338	97.1916	348.074	376.223	4199.96	1850.53	1966.08	2289.73	337.268	859.879	1082.62	1613.42	339.361	1868.54	662.988	125.151	319.818	2110.7	2399.35	1606.62	127.23	241.682	621.929	1444.8	2146.76	58.201	550.148	225.084	465.327	580.075	646.221	1007.12
K02340	1650.62	1129.38	1265.07	195.848	483.646	602.182	1382.04	248.81	1329.27	1118.38	573.32	607.413	683.125	316.185	946.618	534.157	650.465	324.805	772.999	430.416	165.761	2408.94	1331.12	2631.75	2049.63	1829.01	1193.71	1171.29	2478.71	1105.37	2762.51	1783.71	50.682	117.036	1103.92	2224.56	996.368	146.341	199.554	802.798	1619.45	2325.74	44.915	326.377	151.387	615.93	721.265	854.082	374.174
K01677	1813.73	1118.76	1919.44	359.088	228.575	812.67	1247.63	273.885	1321.95	1491	589.667	60.8766	226.39	302.465	1145.96	513.45	672.726	503.56	53.786	284.478	63.5984	1654.14	1638.95	7199.67	4267.47	671.239	807.511	778.327	3369.69	89.8619	2847.87	702.43	47.605	187.677	934.527	1830.39	1654.75	104.11	140.746	801.327	819.941	2442.52	20.5266	90.0665	127.552	867.969	527.203	894.717	575.212
K03469	2031.65	987.913	1262.95	128.961	766.463	572.959	984.293	154.876	733.406	907.836	605.034	584.756	637.986	276.724	920.054	526.128	590.871	623.646	110.712	435.812	216.816	1464.75	1209.86	4248.93	1842.96	1459.67	1287.22	1474.34	1825.58	654.252	2821.8	1445.33	45.3612	177.001	1428.67	2331.48	979.748	142.066	182.16	793.778	1724.89	2726.93	34.2103	351.993	181.422	844.218	602.617	602.588	575.293
K08301	2313.31	2821.07	2833.16	101.622	668.644	409.807	1586.41	190.161	471.957	394.508	530.547	1132.51	1078.84	112.786	700.239	497.343	624.621	190.269	984.855	487.143	201.006	2094.21	1567.49	402.717	1369.98	3153.59	2182.92	1745.77	1275.12	1617.5	3022.78	1855.69	45.1278	132.488	1128.81	2880.91	790.731	93.9915	198.234	536.018	1599.87	1000.55	32.3846	454.88	196.765	326.324	688.651	592.87	219.846
K01778	1863.5	1403.05	1463.86	314.61	602.771	589.074	935.143	205.613	880.44	818.492	679.829	431.462	578.39	314.698	714.827	484.702	563.038	440.925	953.901	329.341	98.0424	2498.08	1934.23	4647.42	2790.7	1756.94	1230.56	1409.15	2576.45	331.126	2278.43	1060.42	52.1698	113.117	884.589	1624.04	889.182	106.777	193.258	822.519	1659.21	2367.53	42.0911	151.987	138.545	375.88	776.182	754.034	394.77
K02501	1904.39	1112.53	1376.21	261.433	531.761	636.841	1200.15	226.35	1019.47	850.069	699.63	693.628	672.36	325.797	846.766	429.484	551.769	206.901	903.652	377.704	76.2844	2218.37	1745.84	3225.85	2609.5	1801.16	1165.83	1376.64	2629.05	491.29	2579.99	1606.97	40.1735	144.411	1064.63	2275.42	1011.93	166.035	176.697	778.683	1182.69	2688.64	15.3613	66.3244	67.7605	543.41	655.941	871.177	434.625
K19265	1902.95	2009.91	2158.31	382.861	714.52	675.198	1107.03	185.599	733.435	888.565	1045.63	897.969	608.732	420.212	1006.48	679.629	656.698	249.317	878.26	508.408	111.682	1041.75	997.256	956.965	2081.09	2282.21	1845.32	1746.63	2453.03	925.105	2787.21	1795.89	39.7806	57.3783	758.555	1811.14	747.99	100.247	191.008	515.766	1872.89	2198.72	19.7636	85.2686	60.5181	552.097	842.533	1116.96	453.832
K15532	2970	1627.49	2034.06	173.957	71.6712	505.297	1527.08	105.879	831.618	723.611	491.158	452.161	224.983	80.8009	872.092	573.85	411.473	515.9	15.849	326.846	21.2419	457.131	1722.22	2440.42	2631.18	1283.24	1590.01	671.074	1597.14	488.205	3325.38	1254.46	29.0707	169.288	1300.14	3673.13	1663.24	248.809	346.14	974.692	2106.31	2173.04	23.5487	41.0116	55.1767	194.77	896.569	798.088	350.384
K11071	1992.59	2042.12	2474.97	285.319	731.076	588.754	1592.95	271.556	1777.84	1136.97	558.403	157.445	187.068	460.038	826.339	441.13	810.333	203.908	47.6802	349.291	30.6526	1503.43	1154.54	1573.46	2790.23	1966.78	1381.41	1236.28	2629.5	631.329	2676.22	1234.68	63.9887	163.343	1143.15	2805.25	1328.38	101.33	202.67	632.475	1446.41	2484.53	25.9994	65.0754	37.6553	237.245	768.638	711.759	444.121
K03705	1435.6	1135.34	1681.79	262.634	224.19	660.764	929.018	246.996	2180.23	1876.77	691.689	82.3862	266.93	757.469	819.649	368.123	747.51	499.379	55.1094	295.08	130.486	2423.84	1499.04	7131.49	3377.8	820.466	628.568	1161.69	3095.3	74.7423	2492.94	649.393	40.9349	188.507	938.093	1789.23	845.88	93.049	133.303	581.111	903.506	2581.36	32.1287	92.7713	106.346	711.204	525.838	819.416	499.93
K01515	1197.68	600.139	1638.25	271.607	605.052	970.041	1642.43	269.948	2130.54	1786.58	545.773	218.617	375.856	313.162	1357.93	465.964	736.375	448.265	734.075	423.768	38.1168	2531.07	1405.91	3566.75	3432.75	1078.89	581.465	1307.33	4061.56	226.877	2558.28	554.081	76.7707	250.936	1057.51	1735.08	1093.6	168.256	114.859	762.295	912.35	2344.71	29.5193	68.7185	97.1823	629.868	772.91	1007.05	517.791
K02493	1276.21	1089.35	941.817	258.68	489.392	630.682	984.999	250.873	1374.87	1148.35	700.19	674.529	613.945	303.54	971.787	458.098	488.349	615.92	678.426	372.787	69.0971	2652.14	1577.46	6606.27	2157.02	1551.36	957.104	1171.29	2636.47	363.715	2059.13	1181.38	41.7807	79.6738	780.576	1302.94	705.088	151.829	209.258	865.823	1615.71	2130.75	34.4257	87.2497	106.196	685.946	788.273	1109.32	470.406
K00297	2067.17	1818.49	1494.31	179.572	902.777	365.458	1482.32	231.14	1341.92	1029.07	741.198	1019.14	710.58	254.146	1228.01	707.646	599.912	344.254	971.013	553.862	177.089	1400.17	906.506	820.148	1461.75	2159.47	1559.51	1145.74	1730.39	1183.35	3034.92	1921.58	27.0468	46.4862	1151.82	2306.89	801.347	92.5989	177.696	547.261	1853.62	1959.9	45.4359	330.281	116.761	558.406	1019.82	1004.2	302.315
K18369	2045.7	2262.46	2597.26	513.62	227.851	1020.1	866.053	133.908	1224.35	1021.34	499.818	302.249	340.529	967.186	554.554	296.548	609.732	209.413	74.8618	324.964	112.532	69.5988	1389.05	5823.42	2504.27	1968.17	1384.7	1716.59	1939.43	373.526	2220.06	975.587	54.7728	209.653	1389	3241.44	1570.48	112.7	236.468	557.316	1613.35	2667.27	29.9096	345.198	139.304	332.018	564.37	496.454	397.487
K09022	1807.43	1048.43	1514.11	102.811	1546.51	390.682	1563.96	151.636	1398.35	1215.44	517.586	500.101	495.291	263.092	889.12	545.145	517.22	430.001	80.7593	448.497	108.074	2361.22	1253.03	4261.21	2855.05	1091.19	1242.48	1062.24	2852.47	509.26	2946.78	1553.89	116.732	139.57	1470.31	1874.91	613.273	215.754	245.631	1013.6	1108.45	1768.64	40.9438	243.271	140.851	522.159	739.252	930.715	577.576
K00965	1472.97	1280.04	1721.44	315.255	747.394	594.513	1207.65	254.09	1634.79	1524.8	1034.01	83.4558	171.067	442.278	2393.94	912.433	687.642	268.563	15.0891	289.701	75.6151	1850.86	811.878	3484.4	2738.26	976.758	826.59	1291.11	2646.36	135.145	2830.87	822.321	43.6005	154.408	1053.63	1813.97	1624.71	59.3212	74.1543	471.055	944.921	2700.93	41.8627	241.647	125.672	655.124	501.167	893.567	442.536
K00891	1692.85	1658.75	1783.82	263.525	1542.44	452.994	1564.84	279.018	1371.76	1153.99	550.431	825.759	585.492	265.36	776.57	422.937	406.325	314.408	606.388	556.707	89.3065	3526.65	1362.6	337.757	2591.55	1610.63	1375.93	1680.98	3049.16	466.443	2752.18	1538.26	106.348	132.922	1169.9	2061.08	927.258	103.477	134.56	621.802	1456.27	1505.79	6.01797	30.5968	35.559	252.724	922.716	984.678	236.253
K01278	2932.79	2071.78	1701.75	78.0998	50.0161	105.491	1068.86	115.771	239.754	165.302	797.171	962.158	415.16	135.624	866.76	636.078	488.918	339.452	98.5838	413.922	80.8793	102.737	1415.36	1344.35	420.673	2857.82	2268.13	1357.78	809.09	1066.03	3014.99	1897.38	8.39889	39.2843	1337.84	3195.26	948.544	204.779	229.203	564.46	2616.91	2091.66	40.3348	200.76	78.1169	321.448	1009.48	690.039	186.995
K09710	1766.84	1117.15	1514.19	153.12	471.323	629.387	1106.65	177.274	1263.05	1289.62	610.573	581.963	499.872	173.182	1134.91	569.068	458.113	259.984	778.788	354.928	94.1991	2534.99	1543.34	2014.27	2167	1768.16	1034.86	1126.24	2106.65	648.896	2900.21	1667.48	89.9408	192.018	1306.23	2250.43	1142	115.344	231.446	816.804	1454.93	2304.76	54.7363	278.637	108.44	374.976	909.62	622.8	393.917
K03517	1949.08	1975.45	1951.67	269.445	583.773	487.791	1341.39	249.477	507.46	604.637	542.55	892.166	853.668	344.778	1191.71	636.624	646.506	256.878	912.499	554.746	164.784	732.765	1064.77	736.922	1844.6	1981.91	1838	1713.81	2146.52	1068.71	3763.62	1960.33	21.6356	85.2174	1069.8	2239.15	713.236	124.038	177.47	609.414	1643.58	1274.6	32.2613	294.85	133.598	575.582	913.461	936.527	298.218
K03581	1533.05	1259.92	1332.41	206.665	760.298	640.084	1308.05	211.366	1942.14	1642.05	425.489	756.084	784.154	143.329	859.173	482.401	574.234	430.58	184.806	348.811	81.4911	2991.29	1353.35	3505.16	2346.69	1315.56	1679.83	1254.94	2490.36	262.143	3537.41	944.918	85.4053	169.178	1307.73	1759.46	1210.91	45.6503	135.478	776.622	1045.32	1887.37	33.5849	216.995	146.142	513.355	426.288	711.08	403.87
K01960	2862.15	2918.1	2865.74	106.022	46.7901	197.668	858.49	67.1786	135.683	120.674	431.893	1045.53	601.375	42.2011	724.838	558.503	581.52	271.519	122.581	564.858	153.679	0	1340.94	322.271	632.026	3333.32	2689.37	1754.42	527.353	1901.18	2903.21	2448.52	0	107.587	976.261	3057.76	666.458	126.924	279.214	537.291	2290.28	1517.59	28.4279	458.917	118.669	365.348	1011.62	530.595	197.944
K13789	1955.16	2283.79	2267.22	166.846	170.071	690.607	746.333	154.937	1354.77	1256.39	467.177	833.768	828.723	305.454	906.055	464.808	707.53	351.594	835.74	374.029	142.467	1522.16	1319.08	1826.56	2042.11	2333.84	1605.09	1599.35	2192.95	505.057	2321.21	1375.23	21.5993	153.59	946.443	2295.93	718.062	106.27	233.309	676.553	1507.73	1491.26	31.0336	257.01	170.329	572.613	644.982	729.912	363.157
K00864	1779.2	1188.57	1355.33	486.917	1171.56	932.265	1191.02	155.326	1575.18	1522.79	948.952	287.225	389.157	407.098	1094.41	598.999	609.193	531.106	81.1705	482.995	178.228	1554.82	976.598	3443.83	2800.31	862.887	1184.89	1148.65	2983.03	310.097	2980.54	1070.86	73.8898	194.956	898.773	1822.4	1106.9	114.496	187.254	738.599	1488.78	1930.2	38.3872	157.799	108.953	574.212	601.508	1059.6	686.772
K03584	1726.06	1106.2	1177.49	164.676	592.223	547.111	1303.46	271.154	1693.45	1264.47	784.872	489.562	535.647	159.717	1082.34	562.708	506.606	288.838	903.361	428.224	146.729	1922.76	926.287	1829.66	1895.27	1673.61	1014.04	1068.66	2016.1	717.9	2840.96	1461.74	50.5595	111.317	1109.82	2230.98	861.237	158.605	184.292	688.898	1502.76	2170.27	44.2319	127.212	60.3891	433.664	796.162	910.386	386.045
K04486	1414.88	671.807	1626.71	168.552	52.7547	839.586	1375.64	306.344	1491.02	1558.49	480.616	303.87	491.025	232.235	695.881	335.724	688.133	599.966	851.549	428.687	32.952	2051.28	1537.66	3286.49	2553.28	1613.66	886.106	1072.89	3283.3	482.003	2577.92	1249.91	39.3282	163.28	985.409	1858.75	882.653	184.975	142.189	829.817	809.463	1904.37	23.7564	67.3474	85.117	507.41	850.192	1026.53	490.381
K21903	2338.42	1504.57	1732.22	415.418	42.8879	805.302	1091.22	232.164	1253.68	1710.64	633.254	58.7854	261.405	350.387	771.643	332.415	767.334	486.507	0	271.183	62.7559	1127.76	1709.26	3435.48	3775.46	950.803	883.61	929.178	3454.38	97.6951	3718.77	1064.1	60.0253	175.378	932.59	2475.85	1338.15	118.608	85.7175	672.418	850.979	2579.02	13.5738	50.7202	108.207	700.696	627.644	796.941	573.255
K01284	2952.31	2605.52	2198.15	20.7184	439.918	93.5507	984.245	81.7308	166.726	193.676	405.533	1516.44	650.881	17.1164	816.573	573.685	342.942	340.326	190.358	511.713	189.841	635.938	1458.21	241.231	531.512	2732.5	2560.63	1357.92	397.557	1575.06	2781.71	2662.78	30.7258	75.5883	1108.82	3237.98	886.23	157.044	319.724	674.42	2742.12	1550.17	31.6146	245.299	94.6369	245.252	863.502	577.146	227.154
K11749	1678.01	1761.42	1686.48	111.931	589.879	481.561	1119.04	180.201	1532.95	1206.75	426.964	626.359	538.762	140.565	866.899	532.043	432.773	396.04	738.064	409.025	113.156	2843.03	1518.68	1822.97	1753.91	1867.8	1406.04	1731.04	1890.69	920.229	2882.3	1410.12	58.4756	118.456	1108.63	2293.37	754.731	123.946	215.903	656.258	1442.35	1297.15	24.6615	226.351	176.573	658.904	695.749	926.621	479.632
K01961	2326.68	1524.32	1315.7	194.79	871.977	317.151	1259.62	172.962	1135.2	1000.23	827.348	987.286	476.242	154.367	1945.57	1114.39	352.599	783.256	135.283	544.068	79.2758	1643.35	1062.17	314.11	1179.69	1577.64	1657.99	1021.85	922.37	845.399	3566.27	1544.67	58.2531	70.3038	1332.18	3148.37	798.531	185.53	178.535	537.845	1962.34	1891.9	42.8837	101.6	67.3907	510.927	914.355	1045.68	319.853
K03763	1513.66	1400.15	2105.72	350.387	121.032	901.392	1178.32	295.105	2306.87	2020.14	771.209	49.2323	187.241	342.056	1283.53	566.976	613.222	300.455	19.4352	359.489	88.095	2267.71	1280.88	2473.85	3461.91	676.091	899.168	1257.41	3944.2	124.932	2941.36	761.308	51.5671	188.526	1068.18	1837.52	1560.35	69.9397	93.0502	561.842	646.265	1892.17	26.178	167.999	121.598	623.435	641.238	1066.9	582.442
K08289	2116.33	3107.65	2969.21	107.152	577.542	278.299	970.304	108.468	137.81	139.858	982.507	954.861	385.328	203.574	395.92	334.401	1133.26	294.966	107.037	412.258	138.823	656.428	1125.81	1525.24	880.939	3331.51	2070.89	2316.78	827.615	1061.28	2093.1	1610.67	34.1799	166.049	1059.9	2845.13	694.72	87.1345	208.316	395.603	1995.89	1518.54	46.3988	317.666	176.583	725.049	618.26	412.348	257.76
K03307	2119.44	2069.75	2333.75	200.392	807.217	387.645	911.595	88.5055	572.883	662.108	765.363	732.689	605.753	186.746	890.163	595.22	510.963	398.769	810.597	445.025	70.5311	2555.54	2061.28	257.451	1011.76	3024.64	1956.26	951.815	1082.96	855.417	3371.94	1574.87	64.0332	131.787	1150.47	3149.49	832.413	179.39	223.329	524.428	1697.66	1222.86	8.68831	44.6176	23.5513	295.228	935.023	922.746	225.818
K00702	1654.75	2190.34	2664.53	230.688	205.796	694.789	1077.25	220.774	984.129	1093.44	603.643	35.3956	191.632	310.431	1153.13	614.467	953.796	38.2253	58.6678	221.868	13.3053	0	919.007	3661.03	3863.46	2103.66	1521.82	2047.65	2701.77	111.207	2376.72	813.335	36.2469	207.663	699.815	1981.44	1171.27	58.3635	167.197	520.993	928.626	1906.86	22.6638	67.2471	84.8926	602.016	442.022	902.629	567.784
K15923	2849.96	2050.01	1202.06	25.772	33.3626	360.355	922.904	83.011	372.388	478.377	557.091	869.997	547.748	149.594	1379.14	801.298	266.668	257.67	800.815	391.037	26.3786	129.559	1620.03	326.451	409.366	2481.03	2075.94	733.586	448.397	991.377	2948.32	1609.58	0	17.8573	932.257	3074.63	872.724	257.887	422.826	695.461	2667	1605.76	0	52.5742	32.259	436.96	1292	1165.25	227.309
K17320	2178.29	2050.77	2768.12	293.245	164.988	398.771	2027.73	482.064	1792.68	1450.1	622.01	6.27178	92.3423	208.655	488.516	269.86	523.367	10.5752	14.5517	221.408	0	881.486	751.946	1174.27	5739.84	896.657	1089.36	1135.16	3536.58	90.0303	3899.04	723.89	38.5179	247.775	1086.13	2434.16	1938.59	31.3875	31.5595	339.672	538.358	2347.85	0	35.557	13.7089	57.8637	666.637	924.951	266.236
K06001	2544.32	2477.2	3301.04	228.373	84.2917	771.741	675.979	72.701	230.956	328.43	407.542	994.976	922.037	117.655	2158.83	1077.91	830.394	551.179	758.881	485.266	287.323	0	864.225	778.047	1279.33	3151.71	2093.38	1579.39	685.756	1356.85	3122.12	1840.5	16.57	137.077	887.702	3053.31	600.345	76.3245	192.774	352.346	1432.93	1062.19	24.7454	266.134	144.467	367.194	832.564	651.159	503.291
K05995	2349.56	1242.65	1673.09	344.468	810.312	207.607	2203.3	395.753	1072.51	1236.84	1293.89	336.948	444.29	1552.07	1604.86	867.682	376.017	104.873	116.513	240.42	149.594	1934.34	697.041	712.285	2894.26	536.436	1172.79	994.979	2464.82	543.443	3165.11	1182.74	48.0256	156.341	1645.64	2581.97	922.968	67.5798	188.653	664.906	1780.97	2274.19	41.1064	340.792	147.385	236.873	647.928	971.167	511.201
K06966	1830.33	1249.89	887.202	196.826	621.642	400.58	898.072	143.804	683.262	545.952	660.437	928.594	591.39	278.232	878.256	570.376	491.078	620.118	754.733	419.498	67.6234	1618.84	1121.48	2724.58	1315.09	1848.89	1507.65	971.804	1343.14	493.431	2439.03	1245.2	33.3642	97.8929	1270.31	2140.11	698.278	238.13	267.731	910.055	2136.55	2551.03	37.4819	89.0893	90.1362	242.678	928.211	805.568	399.136
K06142	2866.32	2703.84	1892.73	17.1526	613.644	267.505	864.214	78.86	129.283	92.0628	278.578	1713.34	637.354	14.8477	584.389	383.201	362.529	145.659	655.5	380.854	108.555	2684.24	1751.68	178.83	457.956	2787.49	2620.05	1598.31	623.988	893.333	2934.26	3022.42	46.1711	101.271	1131.67	3598.49	470.214	178.227	245.87	641.871	1808.54	1161.19	17.486	113.019	33.9821	139.976	811.185	666.363	256.818
K00995	1315.15	947.421	1329.82	284.86	695.296	792.341	1153.9	219.26	1398.79	1144.37	727.63	406.83	746.794	270.351	755.149	478.555	585.59	454.767	866.865	503.801	120.235	1751.04	949.59	3628.92	2586.38	1790.9	889.342	1307.13	2201.13	446.972	2138.88	1082.59	43.6557	148.457	859.172	2056.4	915.839	127.706	123.318	626.809	958.426	2315.07	47.5596	173.039	124.02	682.99	688.661	852.094	438.903
K00677	2387.13	1944.35	1644.43	32.3305	688.196	270.609	1463.5	103.967	135.457	136.371	363.667	1379.83	789.146	31.355	727.77	568.772	385.132	160.641	823.577	493.748	104.333	2348.85	1793.83	250.314	440.701	2698.62	2271.12	1424.92	553.692	1419.23	3298.73	2311.22	34.8196	57.9302	1282.31	3278.26	740.228	126.253	227.738	476.119	1879.13	1123.26	20.219	263.402	98.458	232.085	907.914	641.571	182.11
K00610	2341.87	1598.94	1737.67	256.539	794.642	432.45	1433.06	191.233	983.502	914.492	688.162	236.595	239.381	243.41	512.236	483.371	523.488	238.991	26.6563	351.921	64.2927	897.186	977.44	2024.61	2976.16	1305.24	1228.64	1214.86	2318.54	736.67	2705.01	1524.73	34.9874	160.164	1152.57	2681.5	1510.44	143.421	155.719	708.434	1404.7	2662.01	20.5367	132.308	62.5441	477.059	583.013	595.212	362.504
K02935	2079.8	2673.94	2405.14	281.432	357.077	589.595	154.822	11.4029	854.003	812.377	608.171	386.152	680.498	600.702	1138.41	657.922	733.154	244.48	318.544	302.794	195.563	1137.47	1120.67	1045.54	2556.41	2603.15	2057.67	2326.48	2207.8	158.35	2926.32	1660.83	51.544	138.745	990.278	2524.41	128.21	89.7205	220.443	644.362	1531.2	1766.18	26.9062	357.273	241.735	607.924	528.098	660.219	335.46
K06287	1334.59	874.49	1220.51	212.115	721.603	506.852	1342.78	262.971	797.188	998.953	635.07	906.377	618.172	322.708	815.199	416.427	642.873	444.927	615.478	369.428	64.2965	2031.13	1363.2	3457.95	2024.69	1667	1024.87	910.886	2898.86	547.935	2311.47	1525.05	59.6194	105.69	893.318	1563.42	579.99	139.27	202.273	778.97	1474.45	2000.75	43.3896	97.609	75.9156	599.36	766.549	949.47	554.556
K00919	1308.69	954.271	1217.65	218.113	465.789	686.987	966.389	182.679	787.96	898.554	620.313	609.128	624.87	341.663	696.106	345.947	677.671	443.484	810.086	306.092	76.631	2106.79	1357.52	4934.04	2441.34	1722.77	902.285	1530.45	2666.23	294.338	2135.49	1131.7	49.4971	123.494	824.847	1302.62	548.407	85.7452	163.705	688.867	1454.38	2294.54	37.1374	114.533	92.2092	639.17	645.414	876.176	427.654
K00854	1979.28	1824.22	1672.72	287.351	826.476	437.545	1061.79	196.771	638.71	850.779	1040.29	301.296	252.026	319.171	1039.41	597.732	437.116	164.988	38.0915	388.936	31.2199	1225.72	996.371	1208.61	1991.2	1920.14	1226.64	1438.65	2565.87	670.751	3208.33	1539.01	30.2117	89.7326	956.57	2495.25	1190.58	102.55	144.701	492.216	1585.94	2226.45	39.725	74.4488	56.3628	570.872	794.598	962.45	293.827
K17319	1949.6	2184.21	2649.95	257.178	173.909	363.85	2102.84	475.712	1914.03	1510.72	605.894	0	62.0294	234.494	280.615	142.172	489.333	0	18.4835	228.114	0	881.179	574.006	1140.29	5346.98	880.47	1135.15	1109.27	3407.7	86.1614	3504.99	709.177	61.0319	255.887	1030.65	2410.63	2015.7	24.4123	15.57	384.686	489.975	2231.37	10.1407	30.7462	22.0584	109.989	667.111	957.188	319.3
K09811	1272.8	1062.11	1264.26	190.757	702.493	282.197	1145.78	264.023	1179.33	1105.42	645.059	659.763	439.453	403.127	684.441	463.325	603.914	375.234	79.4172	425.486	159.647	2536.96	1271.72	1812.48	2313.54	1312.42	1192.28	1413.13	2346.42	630.005	2523.8	1671.13	37.9679	132.561	968.484	1791.54	542.65	148.049	182.776	816.006	1386.56	2129.69	32.2908	227.844	103.497	412.619	674.929	838.109	435.851
K00859	1184.96	717.215	1074.75	103.197	612.499	553.63	789.241	217.828	1769.03	1275.29	647.508	618.948	746.249	309.003	637.606	419.952	449.617	647.536	593.795	361.219	103.312	2165.93	1204.3	6951.65	1845.58	1492.45	859.737	1272.45	2164.82	346.766	1868.12	980.845	47.2489	127.086	869.074	1264.09	636.977	85.8719	132.304	606.033	1230.25	2064.38	20.5077	59.0268	75.592	528.212	621.359	633.903	458.002
K07043	1607.87	812.002	1231.06	164.648	691.079	480.105	1174.54	175.925	818.774	1006.03	543.104	418.498	242.632	285.895	883.364	469.101	598.386	412.053	24.6247	353.308	110.742	2257.99	1665.72	3168.92	2372.06	1246.32	1097.48	992.731	2600.32	669.853	2373.66	1649.14	62.5576	106.466	870.833	1429.81	610.096	156.348	190.924	785.619	1578.88	2132.72	36.3761	165.165	107.3	508.315	523.687	760.36	408.733
K01770	1753.19	1865.89	2134.41	261.16	570.817	655.626	802.669	98.5182	538.556	713.57	738.855	700.539	618.341	318.627	1504.15	648.086	723.246	429.968	682.472	392.903	172.137	571.838	953.977	1219.16	1596.83	2314.72	1727.66	1675.58	1986.06	647.442	2953.01	1681.12	30.3504	108.172	878.002	2495.72	569.393	102.819	169.231	538.826	1642.72	1701.55	37.2895	307.554	157.926	599.342	817.732	870.813	289.597
K01489	1861.27	1090.8	1378.5	163.618	550.739	494.538	1113.75	205.13	1520.57	1297.44	581.238	498.885	372.225	233.665	479.95	254.36	515.256	554.615	140.562	402.453	182.372	2427.53	1348.24	3495.55	2447.03	974.903	985.59	971.877	3023.84	654.116	2605.94	1402.51	34.2982	124.564	1087.29	2190.45	1168.71	126.984	204.264	789.587	1579.98	2100.47	30.9099	210.778	135.247	332.83	677.117	601.574	381.453
K00626	1911.47	1464.93	1775.23	616.746	1092.77	783.51	1641.75	239.853	1536.59	1367.45	641.289	90.1983	247.089	1753.24	720.985	444.592	624.932	443.532	36.4538	375.66	168.77	2342.87	1149.06	2190.54	3294.62	500.341	1088.75	888.035	2810.7	154.987	2065.58	538.458	99.1466	176.617	1142.99	2227.51	1361.62	69.891	96.9644	546.928	663.38	1868	59.9221	426.148	266.803	421.291	792.845	895.556	611.651
K01179	573.82	2930.72	3733.93	69.9971	14.5748	726.801	492.213	85.6381	600.012	1967.68	280.874	341.957	125.693	537.802	2256.84	956.427	1364.3	23.709	7.29605	450.053	17.4867	0	152.804	106.274	1574.6	533.468	676.017	2588.93	1709.97	649.236	5390.61	1785.67	24.0824	190.351	341.099	2321.99	821.98	12.2471	20.0036	248.974	421.962	346.726	0	89.9167	65.2113	2097.06	362.234	1847.33	676.238
K03621	1390.12	1174.07	1578.09	240.318	459.663	948.03	1134.87	204.366	1927.7	1645.65	492.577	466.638	744.643	235.663	890.202	479.184	557.153	419.665	789.72	376.242	193.874	2444.85	1129.51	3705.49	2992.74	986.779	849.004	965.656	2551.32	309.31	2501.02	989.442	61.6495	201.339	1012.4	1744.35	1394.16	101.277	124.751	624.046	591.448	1553.74	44.4629	368.631	257.65	848.59	592.581	887.238	559.674
K09760	1524.57	994.543	1127.27	164.708	848.902	633.505	1207.67	210.499	1459.11	1126.16	659.36	824.82	763.006	161.181	1174.53	631.004	588.731	423.627	818.764	346.99	147.68	1461.79	942.766	3440.55	1360.65	1614.24	1172.91	794.562	1375.79	671.758	1817.98	1206.73	39.1576	122.669	1107.04	1955.81	1064.11	110.07	197.419	731.994	1405.95	2334.02	47.4615	226.029	177.059	476.153	728.079	668.601	356.009
K01620	1633.97	1171.32	1292.79	149.552	621.013	575.79	1169.13	218.904	823.159	757.189	719.266	423.519	542.738	209.871	734.299	457.01	461.189	473.161	846.49	368.622	47.8287	763.116	997.183	3827.21	2232.45	1889.25	961.808	948.834	2803	662.318	1923.36	1044.83	41.0777	100.27	894.847	1835.69	862.62	153.528	233.017	878.759	1795.53	2215.46	37.7012	97.0795	86.6394	421.627	751.709	761.136	430.733
K01661	2026.93	2936.95	2987.06	137.164	643.991	413.372	926.255	66.7853	217.212	162.794	589.862	1091.11	593.223	137.303	507.61	373.39	804.583	654.938	982.216	218.587	74.6053	2491.82	1677.4	494.292	884.495	3432.46	1939.85	1839.1	521.86	783.612	2216.99	679.944	57.5683	215.039	1243.68	3296.87	945.861	75.2872	226.403	324.831	1580.66	960.178	40.6499	54.9626	64.4859	468.43	798.536	583.815	128.365
K03151	1541.33	1190.09	1742.2	336.736	858.475	832.558	1355.34	219.689	1884.25	1734.23	588.773	96.6666	283.703	536.64	1148.8	541.485	613.07	343.105	33.2173	297.841	140.989	1716.27	878.182	2983.44	3290.06	640.031	756.881	1052.95	2377.01	98.3579	2679.61	701.428	86.5618	228.382	1168.85	1922.84	1698.66	78.7489	84.7134	546.4	676.505	2078.34	20.7047	91.4691	89.2407	586.927	587.465	832.651	501.927
K06023	1638.08	1411.56	1744.59	292.697	299.943	955.835	1052.97	238.111	1847.21	1866.19	638.173	201.235	588.861	399.473	1237.77	589.262	655.152	250.617	690.144	286.56	85.4631	841.884	681.483	3083.13	3528.39	1031.47	832.749	985.679	2620.85	143.973	2726.82	746.934	37.0172	171.347	952.806	1843.11	1727.65	67.196	88.4715	508.776	633.193	1881.55	14.361	70.6583	96.6426	550.458	688.42	1079.37	464.798
K00652	2383.51	3301.23	3042.62	41.2076	480.633	301.113	1131.08	93.0981	82.5085	57.5872	465.681	684.016	460.252	39.6049	480.387	369.224	525.189	138.736	621.379	403.877	40.0443	544.94	1298.82	274.212	720.926	3640.52	2259.78	1851.01	507.146	1064.02	2677.36	1572.56	32.9356	188.372	1357.55	3561.27	753.132	132.851	290.848	397.698	1988.88	1220.55	0	71.2195	33.5102	213.488	743.241	458.542	145.121
K15581	1096.69	691.492	1190.95	258.845	467.896	1014.66	1109.28	253.977	1666.37	1313.64	458.997	191.155	480.586	214.292	492.228	229.74	551.389	398.152	753.803	259.538	29.5873	3267.11	1482.19	3499.81	2275.02	1593.04	509.498	1328.46	2981.38	114.416	1359.68	466.838	68.1542	229.723	1246.78	1834.66	1472.29	65.5718	118.265	586.986	700.424	2210.87	40.2377	54.8697	119.826	421.231	486.867	593.05	397.4
K04517	1236.34	615.816	1264.12	295.075	56.4353	881.5	880.92	153.521	1682.76	1565.77	570.042	448.453	601.747	336.98	724.125	366.948	766.518	410.38	758.372	325.384	120.644	703.741	827.008	4161.1	2787.84	1191.96	576.567	1230.57	2913.29	291.674	2052.04	876.676	21.3526	169.175	867.951	1405.57	1079.17	84.8703	148.461	762.393	938.317	2637.3	40.2397	160.133	158.611	782.08	429.09	719.397	555.715
K00797	1850.73	1410.62	1715.82	505.63	589.62	913.699	1782.28	289.566	1135.7	1346.22	676.27	24.41	101.663	353.939	916.094	450.964	603.523	287.557	13.4119	324.245	24.4487	2415.4	1485.16	3788.39	3416.44	553.051	788.603	791.9	3134.76	128.126	2603.96	626.644	63.9508	265.245	1051.92	1767.25	1652.73	90.5344	135.651	605.977	747.514	2366.45	18.3465	45.6148	56.3258	454.631	666.457	746.682	489.946
K01918	2005.07	2180.54	1790.1	148.074	660.766	380.784	1311.31	186.559	666.446	617.199	643.383	987.407	861.287	256.86	988.484	598.959	467.731	160.871	941.706	438.826	244.061	1544.63	1057.52	494.422	2146.7	2714.1	1698.37	1506.8	1793.09	1033.58	2500.66	1754.11	47.3589	152.35	890.844	2418.41	910.053	119.073	178.269	575.399	1647.01	1410.03	44.9637	314.821	157.854	297.209	711.158	625.218	233.498
K07979	1638.64	1298.97	2420.15	444.962	292.639	691.225	1240.79	300.763	1150.25	1229.11	520.493	268.777	219.599	496.831	419.546	219.479	1106.27	242.778	87.8531	338.939	127.216	85.813	845.786	1924.67	2806.05	1027.06	1417.9	1188.93	4761.76	94.6879	2471.52	750.893	26.4605	178.968	795.36	1230.88	1307.71	59.8666	104.316	723.705	972.993	2311.3	24.7572	236.844	140.227	514.684	817.877	1233.4	618.76
K01997	1521.65	921.285	1312.06	323.615	743.098	773.347	653.265	138.355	1532.65	1302.91	686.23	165.024	271.675	544.096	794.332	456.235	756.033	400.796	47.2514	278.871	107.883	2033.86	1331.81	3731.89	2658.77	1254.56	587.489	1262.85	2326.5	72.9388	1821.62	672.066	61.9203	203.284	993.324	1690.92	785.543	75.1606	115.268	505.388	864.912	2921.75	63.3947	459.728	161.902	685.162	436.716	594.6	524.937
K01077	2151.11	920.19	1168.01	100.224	645.361	537.677	874.464	121.903	569.697	625.821	378.362	463.133	617.906	112.436	709.052	433.284	556.164	396.01	823.353	416.55	103.285	886.483	1032.64	2732.72	1610.26	2193.85	1161.03	847.334	1539.55	918.928	2072.54	1860.95	54.7247	138.488	1127.62	2331.69	1074.61	181.548	226.047	761.276	1627.03	2531.97	34.3407	133.02	76.923	359.792	762.669	574.25	379.778
K04075	1264.83	991.541	988.45	187.03	599.297	588.888	1137.86	243.421	1507.56	1254	635.143	699.755	820.804	419.985	863.491	491.374	560.262	645.068	743.666	377.51	149.996	2569.56	1293.92	4480.62	1781.8	1077.66	924.736	1085.72	2647.74	540.123	2067.3	1117.68	27.4841	87.5861	860.233	928.074	724.683	93.4827	160.627	864.156	1367.82	1379.68	42.6073	254.74	139.761	640.508	747.883	848.667	403.496
K03719	1811.45	999.848	1482.56	142.886	456.544	569.604	1278.94	217.121	922.748	852.394	594.517	580.218	151.411	301.216	372.502	238.968	636.334	202.41	9.31327	229.003	15.3672	713.315	1280.68	2494.52	2229.67	1411.47	1250.26	1424.1	2500.84	298.124	2271.04	776.554	52.4324	202.632	1266.7	2246.11	1069.67	156.453	182.239	841.205	1809.28	3252.5	45.6927	47.677	108.962	362.107	321.872	432.045	333.634
K05808	2286.93	2731.76	2172.02	131.006	547.842	198.198	929.579	149.458	832.034	738.317	387.301	694.995	505.841	241.191	717.245	406.855	190.463	145.252	709.026	389.893	152.863	2602.99	1362.69	312.005	1971	1675.12	1628.46	1565.24	1572.18	608.079	3609.54	1812.53	48.2513	90.6207	1324.35	2844.74	850.561	68.2533	177.781	528.789	1795.58	1510.14	29.0078	165.769	82.048	103.531	661.018	698.477	133.886
K13043	2509.8	3132.72	3059.26	39.1606	45.7598	190.017	855.869	85.1235	178.532	195.029	435.605	1110.17	428.014	103.04	643.222	488.195	826.13	492.395	151.752	319.877	173.712	0	1112.69	383.028	867.121	3326.9	2201.76	2137.5	510.554	1389.91	2600.99	1844.95	15.2304	123.93	1021.96	3025.82	913.23	68.7125	231.244	399.574	1896.92	1092.9	63.23	487.272	221.735	499.496	638.953	409.876	147.299
K01439	1023.33	913.896	1089.8	252.761	629.346	523.236	1024.69	235.912	1592.41	1408.61	798.136	67.9154	184.679	474.483	747.416	353.362	629.669	560.778	27.3225	224.157	40.6655	2136.9	961.307	6429.63	2360.87	882.812	468.136	992.09	2135.66	138.533	1876.75	624.675	59.1519	127.526	1020.01	1266.33	1230.37	95.1782	129.61	624.052	1058.16	2811.91	29.4768	76.0433	134.512	793.613	518.301	768.235	616.26
K03601	1556.49	1423.75	1305.47	317.608	723.039	583.327	1016.41	188.549	1251.25	979.285	857.231	705.207	706.999	312.91	838.389	494.28	562.663	307.881	633.847	450.131	216.969	2460.6	1321.72	1280.11	1216.5	1894.05	1316.73	1461.42	1925.06	781.393	2471.31	1324.59	45.3949	88.3575	968.694	1699.21	671.017	83.5519	120.665	436.835	1505.19	1672.62	42.1007	329.038	162.682	605.342	813.277	935.792	360.944
K02035	911.954	1102.72	618.722	322.164	1250.58	292.462	1163.13	268.486	729.461	758.136	889.839	122.595	132.817	488.533	654.26	264.638	356.733	333.167	75.8815	249.992	70.5724	7163.47	2805.66	1045.4	2321.86	1458.28	442.4	1445.36	2134.45	150.745	1580.19	691.901	136.952	159.232	840.222	1246.22	1499.39	37.9325	36.5685	303.387	1274.27	3094.01	33.5093	73.1726	76.4196	623.375	235.077	435.055	223.707
K15738	1918.32	2275.06	2365.99	138.435	557.802	349.118	1090.23	160.989	1137.07	851.505	638.126	472.653	376.983	253.1	520.765	430.715	634.447	236.628	63.8234	458.843	88.7876	2591.79	1546.98	514.5	1581.76	2074.07	1634.62	1879.02	1717.32	956.216	2495.04	1379.08	43.901	160.582	1110.06	2741.06	728.425	77.7352	130.446	358.55	1342.01	1225.44	25.6477	113.782	55.2361	258.488	670.956	521.139	236.577
K02066	1879.64	3095.55	2977.51	20.6192	738.401	241.227	898.621	73.8183	67.26	59.1711	208.916	810.993	802.624	16.1941	540.363	387.176	299.153	145.459	913.298	378.487	127.989	2054.79	1395.33	368.496	946.208	3179.02	2479.75	1782.62	630.328	1083.99	2525.2	1588.71	56.7577	167.512	1014.59	3093.99	879.14	62.2803	316.188	438.815	1614.97	850.972	46.8529	451.569	189.202	230.669	521.734	374.24	145.236
K01991	2802.51	1533.27	1030.43	18.9123	507.242	165.59	899.732	86.4802	282.397	203.363	499.685	1652.48	735.056	0	643.354	427.218	221.359	244.508	782.069	408.064	128.579	1256.95	2015.31	126.444	169.558	3309.25	3112.33	745.418	393.898	1027.84	4473.31	1315.17	24.5531	29.6678	1275.42	2396.86	1791.6	241.214	323.785	892.539	2726.04	1044.64	21.618	115.597	22.4638	109.06	780.165	597.93	165.084
K02429	3112.09	2031.51	1560.09	52.0652	422.405	73.1982	892.694	107.13	159.277	110.799	315.96	692.132	305.208	12.1535	733.276	474.454	225.498	177.55	78.7242	515.711	81.5124	1049.69	1391.33	121.609	509.42	2133.22	2110	1191.55	469.531	1170.34	3724.35	2499.45	25.1758	57.0249	1336.43	3339.19	600.549	197.371	307.265	598.083	2443.61	1570.72	16.8051	171.263	76.4852	235.84	879.409	474.544	109.445
K03453	1911.16	1223.15	1275.04	163.086	209.165	536.277	805.087	186.76	908.607	967.909	782.479	710.92	665.283	249.869	591.517	385.493	570.762	400.102	625.237	293.997	113.025	1881.84	1668.95	2504.8	2312.52	1790.6	1103.13	1068.1	2507.95	434.97	2209.06	1341.79	31.7571	78.736	711.301	1845.22	695.341	127.722	156.544	803.114	1366.24	2530.96	22.4911	188.408	110.692	382.5	554.569	541.394	443.536
K11070	1590.33	1744.97	2098.03	122.497	477.975	414.618	1184.95	164.778	1066.08	983.513	398.98	178.411	188.419	629.279	1747.42	700.645	668.506	227.429	35.8189	368.042	46.4537	1366.02	1159.07	1611.81	2513.19	1819.13	1327.78	1028.68	1616.28	565.561	2505.87	1267.67	46.6077	102.866	1097.5	2590.13	1157.5	156.713	157.035	482.36	1331.99	2041.25	11.5106	70.1619	54.714	188.264	622.573	631.437	379.136
K00957	2931.19	1728.59	2074.34	166.416	661.695	270.292	1856.52	270.633	573.017	564.151	388.876	224.436	207.517	167.352	2315.59	1044.17	363.019	67.9293	700.564	360.321	33.4312	715.207	817.097	282.732	2586.16	1192.73	1665.8	835.266	1734.72	1113.79	4073.63	1907.39	17.3184	82.5247	1229.34	2404.3	1319.12	58.6946	86.2881	370.852	1369.67	1649.11	10.3938	106.196	56.5729	163.718	817.558	706.849	227.832
K08384	1136.22	635.902	1602.76	153.396	37.6183	840.799	1277.64	277.347	1653.92	1689.49	479.159	0	228.157	256.371	821.791	368.837	588.464	411.983	0	310.845	11.2266	0	820.509	6910.02	3959.87	651.71	459.29	982.813	3769.78	122.435	2165.42	573.526	56.274	192.727	776.036	1579.99	1035.3	113.214	195.077	999.996	949.937	2529.28	28.064	81.458	96.1953	719.913	409.666	790.98	704.745
K01993	2484.35	1726.2	1185.08	178.327	1577.86	298.878	806.166	79.4396	280.757	193.277	926.949	1478.94	995.104	934.892	771.321	609.817	274.52	326.879	752.062	497.064	171.022	2295.9	1774.1	211.162	264.259	2494.29	1968.41	650.715	373.734	749.375	2416.45	1906.72	45.3341	46.2973	1228.9	2715.28	569.501	151.957	187.423	484.969	2053.56	1396.23	24.7988	165.172	56.9609	146.221	1092.57	790.131	171.57
K05837	1874.36	1708.71	1951.13	74.8278	358.33	374.493	748.791	115.605	1067.61	864.522	351.452	658.322	426.649	107.782	404.227	295.131	567.911	411.276	63.9735	372.619	86.3283	2474.74	1531.95	2484.34	2011.88	1830.31	1503.21	1746.07	1961.18	445.665	1950.83	1448.71	45.4904	156.776	1064.24	2254.84	678.457	112.301	174.25	612.083	1414.42	1797.08	21.4949	195.128	107.294	326.593	587.699	439.75	310.482
K04516	2109.19	2801.92	2677.9	52.4522	61.3385	188.753	751.236	78.4026	556.992	335.961	2765.2	1015.38	400.634	120.225	477.928	467.175	1030.1	297.169	134.873	364.542	116.377	286.625	916.136	513.138	508.6	2821.31	1957.07	2018.38	443.629	1359.86	2313.26	1674.58	13.5803	110.821	1001.07	2931.56	678.922	84.0859	214.219	390.662	1712.93	1098.35	55.715	330.465	172.042	427.283	691.966	415.388	172.138
K01626	1059.53	1603.67	1447.87	283.537	1673.9	549.537	1637.01	332.356	1765.56	1199.64	1128.98	199.379	510.205	491.928	561.5	408.568	399.143	58.4713	925.822	314.588	98.9782	3224.66	605.77	1688.96	2599.51	1763.08	729.423	1271.53	2372.63	195.763	1908.16	519.539	83.1802	116.906	1383.84	1325.73	1400.74	14.0853	45.6998	307.69	899.707	2178.5	33.8113	133.906	90.3878	401.207	509.681	692.679	194.608
K00074	2125.73	1429	1943.53	493.569	45.4576	824.092	1686.35	280.872	1126.24	1032.64	779.087	99.3364	176.677	445.87	1248.93	688.435	679.977	268.336	0	262.126	114.917	726.524	812.498	1914.94	3583.73	623.58	1419.28	876.916	2816.99	185.773	3190.98	704.286	60.8782	181.975	1184.35	2247.51	1368.34	65.1798	99.3047	556.733	632.791	1776.78	19.9139	246.47	101.766	336.428	780.55	1027.51	525.34
K07667	1999.95	1013.95	1330.35	293.673	1020.05	1011.6	941.692	150.672	797.846	946.247	778.871	336.32	669.882	449.001	1489.1	789.525	846.792	393.277	1046.12	236.636	99.2502	584.337	794.082	2739.18	2880.82	1641.36	709.112	669.355	1848.85	124.394	2644.7	796.154	59.2081	190.207	1191.86	2088.8	880.019	94.3104	109.057	498.057	768.492	2077.93	31.0637	146.854	159.068	384.68	777.006	951.758	713.891
K07738	1060.6	840.141	1549.75	257.018	760.089	680.668	1182.58	261.639	1474.3	1263.04	665.672	222.492	403.328	288.112	865.809	464.963	574.363	338.62	662.44	253.674	177.142	2859.03	1162.54	2584.45	2796.91	1095.86	723.526	1193.26	2479.1	114.056	2163.05	604.904	73.122	186.832	993.09	1556.24	883.507	60.3174	112.892	525.04	772.799	2124.79	41.1984	259.972	175.791	656.405	607.878	941.245	508.553
K06346	1198.89	1093.75	1337.86	200.17	122.322	536.899	941.007	198.969	1679.81	1439.67	699.616	50.1715	143.432	270.193	684.442	304.504	552.883	296.381	21.7264	225.275	70.7323	2401.66	1359.82	3986.92	3138.41	1060.46	594.935	1339.78	3504.62	45.4798	2010.88	584.623	44.8236	186.927	918.04	1462.98	983.853	65.8379	93.1306	529.791	973.797	2700	22.9387	74.1727	80.929	435.326	316.995	504.27	324.249
K06132	2613.58	1679.79	2107.34	1196.75	488.79	664.832	1579.84	290.17	250.831	350.006	160.979	12.1564	34.455	771.156	1246.94	510.187	173.924	0	0	114.852	0	765.299	832.456	764.25	5935.24	438.495	1027.55	1064.81	3173.77	138.061	3253.68	850.423	87.7727	177.817	1002.41	2275.24	1258.95	84.7808	146.578	498.614	815.508	1805.72	5.75023	243.58	17.9579	19.4038	619.546	608.024	400.349
K00639	2230.16	1254.44	790.663	58.3343	751.325	370.061	1567.62	139.109	171.539	202.855	493.285	1840.85	1972.75	51.7975	1417.95	723.69	308.389	434.181	1072.4	670.61	435.197	1588.6	986.836	407.132	547.557	1780.11	1853.23	558.854	449.379	2049.93	4084.78	2266.05	32.2312	28.1198	1282.55	1313.98	489.607	156.63	186.56	751.652	1469.48	883.974	79.6817	1234.71	530.287	562.676	889.966	675.661	367.747
K14170	964.119	462.074	1192.95	217.077	561.351	806.346	1130.79	231.384	1047.25	1138.91	520.288	182.184	460.385	352.134	973.44	422.672	815.309	418.182	832.213	245.808	34.5834	2388.36	1360.61	5553.37	2628.76	1278.73	396.81	991.703	2714.19	160.72	1852.73	534.22	87.9591	201.17	915.037	1204.82	969.209	67.2026	126.696	656.848	780.949	2437.64	39.7085	67.5782	111.724	681.427	604.101	752.075	456.185
K01693	1077.71	765.174	1438.04	265.358	84.9609	823.655	883.632	170.167	1276.29	1213.33	540.528	182.008	450.556	313.959	943.817	461.142	653.922	128.305	742.061	221.687	49.0558	1760.99	1635.28	4980.82	3299.72	1148.08	558.207	1148.65	2659.7	129.517	1997.42	619.559	41.9036	141.725	855.914	1239.19	1056	79.498	116.959	639.115	809.81	2433.34	16.2849	50.8068	84.7166	702.417	479.092	933.616	507.996
K00969	1069.44	952.764	805.393	109.029	636.782	410.926	1237.99	231.365	1473.18	1076.65	561.699	613.79	560.788	162.074	675.236	385.43	449.371	612.31	797.156	346.943	80.8857	3052.43	1445.63	3814.16	1566.92	1331.08	877.239	951.151	1734.44	415.094	2021.23	1173.89	73.3531	103.469	858.543	1200.64	724.413	124.228	205.742	827.309	1407.19	1629.67	44.0847	143.761	58.3394	421.955	737.435	850.634	393.377
K00548	1713.42	1465.14	1497.97	148.26	938.331	496.211	1357.96	193.411	658.331	810.726	458.984	961.095	765.53	229.405	867.801	552.1	404.549	230.282	859.47	493.859	181.001	2393.54	1494.21	350.589	1839.38	1661.99	1429.17	1005.49	1687.92	1010.22	3427.63	1747.85	56.759	99.6419	966.938	2427.8	907.825	96.1781	107.543	454.863	1309.77	1528.7	36.0869	253.67	94.6954	374.365	751.668	902.95	289.127
K05595	2389.24	1535.38	1205.21	17.9228	639.851	143.919	1508.76	169.305	218.412	160.32	183.765	1230.23	491.913	11.6882	595.157	391.374	76.4064	140.218	695.45	433.332	134.708	1375.8	1078.06	70.4202	316.907	1960.14	1964.62	517.029	344.142	1898.3	3960.62	2917.99	29.7009	21.5085	1430.08	3232.57	1082.84	154.217	260.033	670.428	2593.58	1418.66	0	51.308	12.9844	54.6345	882.288	508.443	106.88
K01629	2374.01	2365.98	1544.27	301.258	893.322	195.632	1499.3	144.841	463.092	626.296	549.932	292.814	388.872	299.166	961.418	650.113	299.275	250.881	53.8402	448.834	87.4831	876.016	928.891	2015.06	3194.53	926.427	1425.13	1410.34	2126.92	380.939	2879	1374.63	49.6213	94.2448	887.915	2189.97	1294.58	179.915	251.569	756	1225.85	1517.8	21.4426	26.8397	21.7324	132.202	849.184	826.934	484.218
K09015	1584.39	1830.05	1470.9	75.8936	460.063	339.782	964.619	141.285	999.86	485.34	578.617	884.964	647.473	145.02	579.056	438.542	411.35	227.048	927.548	403.358	73.5717	1728.49	1021.49	729.288	538.145	2887.72	1640.87	1919.13	799.176	1159.98	2050.74	1638.77	37.8261	80.3093	1124.55	2311.02	625.784	129.65	158.884	410.736	1667.01	1575.1	29.4257	177.151	69.1273	318.57	740.561	526.757	142.415
K10907	1413.69	821.665	1800.55	279.918	103.989	971.681	1162.61	203.126	1232.93	1395.32	650.388	139.499	464.557	355.686	1005.61	448.51	525.255	389.903	757.963	304.044	34.3497	111.896	898.208	5161.88	3131.53	1068	743.657	780.848	2910.43	114.61	2666.13	556.491	46.8112	189.983	873.414	1861.24	1150.06	77.2403	123.59	669.835	781.685	1917.09	38.9906	114.262	130.785	824.535	659.604	1027.03	518.336
K00757	1815.65	1337.22	1357.86	356.693	877.273	685.309	1298.72	186.271	772.905	981.253	837.483	771.442	747.562	434.864	827.77	612.588	520.722	314.598	135.205	674.498	310.563	848.284	633.807	456.513	1180.31	1201.87	1587.43	1144.03	2550.64	1468.87	2748.12	2051.15	58.1471	61.7599	879.284	2031.33	772.057	94.1201	94.3373	581.753	1478.63	1538.56	50.0447	750.798	273.242	724.693	766.892	823.578	596.658
K03616	1829.22	1069.18	1456.2	112.558	564.651	736.325	1158.04	124.973	831.535	1084.82	454.901	612.949	464.58	249.092	833.604	526.258	555.622	589.661	108.322	408.72	181.542	658.866	877.204	2764.9	1984.22	1280.84	1231.78	1042.36	2052.94	722.269	3207.57	1501.89	34.3478	117.553	1107.12	2254.72	914.134	99.431	180.201	638.224	1211.33	1805.3	64.093	233.661	127.016	747.367	673.56	913.536	444.037
K08998	1706.93	1990.42	1927.86	147.399	427.068	340.518	287.881	45.842	1136.3	1159.24	516.33	456.189	511.437	211.948	1306.21	680.704	405.399	252.245	720.105	447.613	172.822	2500.57	1383.93	277.554	2146.8	2123.95	1604.49	1890.94	2756.31	209.87	3348.21	1470.89	45.8012	115.335	1023.24	2319.96	354.409	62.847	122.229	276.888	1129.19	1571.37	5.43023	67.7442	23.4904	212.632	875.201	994.996	218.582
K00868	1227	1098.71	1051.46	211.866	888.638	300.127	1150.18	243.433	1613.63	1073.42	626.908	394.156	158.343	426.365	1121.39	616.692	532.341	246.347	48.4533	356.288	50.8272	3900.4	1481.69	748.362	1232.71	1406.74	1165.57	1320.83	2535.09	481.272	2324.57	1207.51	76.6446	81.3189	1115.86	1491.96	657.731	101.108	115.732	391.888	1277.79	1752.49	24.5175	108.786	63.1278	450.802	532.944	789.768	277.275
K11175	1594.71	1575.14	1362.13	254.156	773.821	541.351	906.899	164.784	1535.24	1171.6	601.39	645.546	668.828	320.24	1469.48	733.761	400.322	256.558	948.326	438.255	185.089	3000.55	1586.5	457.812	1900.95	1457.5	1357.12	1013.14	1588.16	664.134	2541.37	1310.41	42.346	65.9265	942.414	1741.78	783.073	139.904	145.978	473.053	1175.01	1219.11	28.5656	149.067	62.1921	432.448	748.21	972.482	345.198
K03786	1981.38	777.573	1379.37	44.1192	65.8592	261.999	721.76	141.26	728.825	624.408	513.667	605.197	253.881	182.449	789.064	475.484	438.704	514.199	72.3047	340.841	69.8951	138.456	1064.31	4528.91	1747.72	1376.16	1390.81	876.454	1377.68	798.325	2889.48	1581.1	19.5009	105.331	813.223	1983.61	519.936	137.267	249.296	868.567	1567.63	2140.09	27.1662	176.821	134.708	542.803	670.637	618.986	405.424
K00793	1753.67	1722.36	1623.14	258.913	433.02	466.667	1350.44	199.449	527.58	573.359	724.581	940.469	639.742	198.577	538.965	395.463	567.558	133.996	820.284	460.608	238.889	2145.16	1404.26	331.857	915.103	2685.17	1680.88	1258.96	1923.34	1303.31	2760.08	1499.47	35.3582	124.751	935.933	2752.07	983.565	92.568	177.429	483.726	1472.82	1022.28	53.8705	334.336	115.61	272	685.566	735.107	280.121
K14540	1616.14	1209.44	1727.25	148.551	169.687	719.468	1185.85	219.811	1744.94	1525.4	584.739	38.8329	273.621	252.431	996.288	478.244	650.97	268.728	12.2354	273.28	70.4474	2031.07	1225.52	4517.06	3081.95	550.458	695.057	905.724	2645.26	74.2879	2424.65	630.714	29.8659	131.861	991.363	1770.6	1432.4	66.6953	94.0622	495.523	565.423	1898.91	18.5059	57.9997	91.8306	677.662	499.962	821.083	437.88
K01809	1423.85	1355.7	988.547	120.35	602.386	530.74	1089.13	158.922	1325.54	953.493	462.913	723.396	648.917	461.713	744.93	355.434	507.982	556.086	853.902	407.165	137.857	2087.16	1177.63	1471.8	819.889	1589.57	1272.95	1160.88	1042.31	1172.13	2657.9	1621.15	33.8935	36.7742	896.564	1985.9	685.98	115.099	161.902	603.637	1470.62	1262.58	26.4803	224.591	106.044	502.225	603.757	764.903	520.92
K03529	1335.93	939.199	1461.19	305.879	213.196	714.52	840.473	178.766	1843.57	1592.19	651.174	67.1715	281.595	549.493	873.876	481.748	627.361	492.276	52.6075	264.591	98.0563	2244.91	1314.71	5377.97	2978.43	450.921	647.917	960.208	2649.88	75.3594	2145.6	665.165	45.7776	131.553	799.212	1311.43	1006.28	78.4573	97.2281	600.94	743.07	1881.5	31.2823	255.598	212.724	718.005	452.297	690.302	541.974
K18640	2827.67	2396.73	1744.4	264.064	1259.64	347.757	2465.06	271.154	1338.89	1248.87	1312.22	20.6128	94.1381	326.159	313.573	176.938	369.163	81.1128	16.1428	348.851	29.9051	3034.2	464.004	542.226	3358.45	722.597	1283.81	750.034	2597.14	94.5904	4678.96	483.501	31.9423	79.1834	799.947	2147.18	1352.27	35.6038	47.3733	654.018	810.361	1691.36	17.4264	0	8.10278	11.9455	467.45	937.651	146.053
K02434	1199.5	1392.54	1377.21	519.478	101.608	669.285	671.121	237.764	1830.65	1560.64	825.991	224.916	385.135	1257.08	1195.53	601.834	420.258	209.649	769.953	280.398	30.8084	2485.04	1046.25	1448.19	2406.02	1356.08	743.441	1375.61	2285.11	176	2722.18	800.563	27.1813	74.7818	638.343	1399.79	1040.89	21.0294	25.9267	240.892	698.485	1799.1	33.0791	196.086	149.793	775.097	486.34	921.313	315.798
K04096	1323.34	875.677	798.201	236.019	722.202	437.445	1042.52	233.844	1086.51	1023.77	738.485	978.705	693.164	353.088	1031.69	560.198	440.959	541.64	821.796	416.474	100.592	2557.92	1209.55	834.42	606.432	1796.4	1092.95	1115.22	1836.31	657.983	2395.32	1602.96	60.9393	76.2238	915.813	1126.01	697.498	88.587	99.3921	488.975	1344.48	1746.89	37.1486	132.165	59.1542	644.267	792.137	984.087	296.079
K06200	1753.07	1257.14	1616.42	719.816	557.074	908.924	960.778	218.142	1038.74	1052.86	960.52	19.7071	129.378	423.766	860.404	515.488	601.458	325.804	0	271.672	49.2173	1746.14	1459.28	2250.72	3463.34	586.62	970.872	938.783	2772.75	91.2038	2502.81	621.162	84.3237	199.965	1110.36	1886.68	1211.86	75.0305	120.361	503.627	883.745	1905.32	29.7318	776.588	245.423	456.515	646.259	876.907	695.42
K07720	1222.22	1446.43	1777.38	129.909	26.1267	417.031	1188.67	288.685	2308.36	1727.03	709.095	8.84685	124.244	480.893	368.564	153.8	515.003	114.67	0	249.214	22.7404	1144.66	655.804	2234.88	5302.04	897.373	877.465	1001.63	3606.78	55.7163	2654.55	619.593	41.9436	206.875	896.964	2125.93	1532.64	70.4755	89.4038	758.376	740.942	2002.16	32.2953	44.9394	73.2591	259.597	473.572	646.651	466.075
K09825	1415.21	1270.19	1335.1	153.832	53.2776	679.363	1051.41	220.803	1309.91	1055.25	379.707	323.932	362.381	208.273	587.783	373.116	560.377	490.801	766.508	325.602	131.938	2113.31	1464.68	2895.59	2221.44	1104.36	831.108	1137.35	2523.45	379.143	2032.64	883.24	22.1161	87.5745	913.1	2243.62	671.966	90.5998	132.818	723.659	1208.3	1881.61	13.8507	54.8285	22.9425	126.63	707.234	665.85	476.846
K01209	1401.56	1857.69	1895.21	165.709	49.6403	383.089	959.302	212.45	630.249	969.537	862.093	173.933	87.9591	253.545	1192.01	530.742	603.637	77.419	0	254.822	5.81618	432.564	1067.25	867.815	2095.35	2096.87	1363.88	1056.25	1509.66	671.648	3682.07	1389.13	12.6308	124.271	891.885	1962.68	1089.27	68.0923	142.594	378.41	1588.11	1431.67	17.9314	67.5865	46.3066	798.803	700.504	1004.17	376.762
K01695	1210.26	1295.96	1205.57	281.166	511.607	370.773	1141.27	208.27	1483.69	1118.21	881.179	359.659	528.469	321.108	1220.02	594.921	410.31	155.729	788.258	414.71	41.3199	2719.89	1477.64	863.551	1490.21	1819.9	1012.28	1273.5	1932.9	553.126	2175.28	1023.96	55.0272	78.7683	920.695	1835.13	735.368	55.6398	110.016	394.963	1174.31	1610.29	24.236	98.9784	50.4303	378.743	807.695	815.082	248.126
K00287	3352.4	2826.16	1907.81	161.721	783.412	227.925	1035.33	219.548	849.48	693.663	658.056	572.544	453.113	383.29	339.647	286.277	322.468	74.0342	743.909	326.719	72.7994	3576.61	1078.67	650.186	2025.78	1424.34	1242.16	1073.88	1857.65	387.665	2148.28	997.305	57.0175	68.0051	904.307	1900.97	886.798	87.5577	99.9506	359.621	1365.81	1779.3	20.8251	33.0667	28.82	111.117	697.532	566.787	155.33
K03565	1106.27	886.189	907.284	173.87	521.975	287.432	1050.11	251.599	1146.81	1027.25	608.708	453.775	382.495	202.565	813.587	353.968	404.572	522.17	54.8422	251.901	71.7355	2657.11	1076.41	5310.26	1548.13	1170.58	878.304	1098.18	2016.78	382.489	1844.8	1156.78	35.3547	81.3614	742.855	1563.3	499.52	126.334	178.659	725.117	1421.32	1629.39	26.9655	72.5521	63.9195	465.445	582.584	693.925	323.932
K02824	1081.38	1082.42	1724.53	260.552	796.415	603.954	813.775	162.051	1684.53	1376.69	580.612	160.123	238.444	759.627	1973.06	831.089	518.018	366.882	58.539	298.171	117.889	3039.68	1427.6	2738.79	2679.3	912.127	921.688	957.145	2243.17	142.866	1920.55	650.338	71.203	161.29	951.361	2073.09	865.292	78.9828	107.671	418.795	551.421	1390.99	32.304	72.3666	105.451	522.416	580.995	864.522	427.773
K00029	2159.38	2651.48	2563.38	28.5964	637.063	247.692	1023.6	76.7419	134.127	138.988	379.907	992.988	672.722	165.244	639.27	461.579	482.871	302.076	770.286	412.08	145.566	739.879	909.094	312.413	736.177	2843.29	1875.65	1418.98	417.359	1271.79	2518.19	1556.87	45.1928	120.231	1106.67	2830.62	807.558	85.9687	214.615	422.886	1736.11	963.922	24.6984	195.438	93.5555	273.178	748.744	529.468	146.261
K21471	851.457	777.083	1187.56	195.436	81.7667	582.775	598.755	162.578	2082.19	1969.65	770.379	49.1331	108.418	551.862	1180.52	469.376	590.467	110.826	26.8057	272.532	13.0286	1822.12	1112.55	2242.45	3377.76	915.951	555.701	1352.11	3046.49	131.879	3079.88	883.174	28.3029	105.819	710.745	1275.3	593.024	74.5361	96.9302	522.875	817.229	2284.61	28.3757	64.3354	82.9629	1076.16	379.492	999.981	531.468
K10542	1866.01	1582.15	1725.33	281.978	414.406	656.75	1470.54	324.233	1438.24	1355.81	639.247	45.4542	195.411	1125.36	517.224	235.782	490.399	209.839	23.7262	250.84	77.7519	687.477	674.125	2363.57	4181.08	565.256	1015.02	901.298	3099.42	94.2121	1975.07	661.747	72.8	184.837	893.82	2095.8	1244.08	78.1267	100.205	525.381	568.803	1848.74	41.3558	177.912	135.389	243.082	783.81	848.482	469.55
K00991	1375.6	942.794	937.668	257.542	780.589	406.695	1113.27	256.264	529.449	406.73	777.176	714.651	497.634	322.023	794.115	472.861	521.306	324.467	891.434	301.198	69.7393	2482.45	1232.82	990.93	1582.39	1646.42	987.906	2032.78	2317.72	355.67	1469.07	913.605	34.1031	68.8054	777.064	1321.2	624.496	87.0043	188.271	507.977	1533.41	1881.41	30.358	45.3848	49.3622	194	801.916	663.166	210.652
K01159	1565.86	1862.55	2151.9	67.9643	472.062	355.732	677.189	51.1676	111.305	286.468	593.481	951.084	773.919	231.792	614.322	429.438	1110.77	264.776	743.355	337.454	152.407	1888.9	1402.13	900.937	465.519	2884.84	1922.54	1781.72	595.987	1104.37	2322.21	1561.31	41.38	168.962	822.464	2512.71	646.808	76.8518	134.705	302.219	1568.43	1244.18	34.835	268.35	128.842	620.178	523.993	489.944	223.049
K03593	1729.09	2305.91	2356.61	144.345	548.119	257.883	749.654	94.1685	99.2888	120.784	656.59	963.37	636.173	142.338	580.821	417.501	575.136	169.889	758.64	316.182	101.113	735.705	1009.68	750.054	628.169	3282.73	1780.88	1597.22	676.979	1056.56	2211.67	1521.91	36.5134	102.351	1032.36	2608.18	651.214	84.8859	174.765	402.334	1646.14	1356.16	38.2141	250.239	82.8711	373.711	614.204	469.665	155.255
K01154	2133.3	1926	1802.22	436.028	57.023	239.441	1577.51	271.411	455.22	304.372	320.557	304.141	233.486	484.689	1637.33	820.406	161.389	53.5384	14.6068	257.003	87.0792	722.832	960.801	379.928	1498.88	1117.38	947.382	1372.47	1991.4	879.755	4415.69	1360.02	37.8593	81.8814	1273.73	2684.45	795.862	43.3403	100.991	304.109	647.666	1599.62	0	98.0426	13.4156	108.316	528.987	274.256	167.012
K02065	1912.99	2631.84	1979.6	36.8117	617.917	302.825	939.795	65.229	63.267	117.181	194.631	726.867	877.502	0	606.808	486.007	350.025	164.3	836.703	374.787	161.133	1906.81	1492.39	317.936	640.673	2782	1968.89	1562.03	603.575	1220.83	2339.9	1691.52	45.2833	73.3509	1014.79	2569.19	751.531	105.547	202.12	413.334	1575.52	811.817	40.3814	436.597	129.649	258.147	621.535	457.104	149.014
K18785	1884.09	1469.11	1453.96	89.0638	55.5986	427.362	885.441	70.1771	491.213	742.44	478.585	1455.77	582.348	112.277	1465.7	904.586	289.194	504.133	179.849	329.416	156.951	0	1048.96	1215.56	2497.5	990.534	1384.39	753.266	796.326	967.8	4408.46	2178.56	0	26.758	859.86	1985.71	686.621	133.381	184.399	576.186	1097.24	1280.22	36.3027	363.12	128.85	541.819	842.772	923.969	542.29
K09768	2289.47	1415.59	2069.5	162.168	640.325	469.822	1240.52	184.952	860.32	928.753	253.036	50.8826	82.3586	183.676	926.425	450.605	714.792	285.079	14.8123	259.643	59.7717	903.701	1258.98	1907.09	5032.31	253.529	691.401	681.9	2949.94	115.511	2682.24	746.747	71.9692	183.519	1030.17	1807.59	1120.12	68.1741	72.584	453.608	359.599	2369.12	10.1266	15.0649	60.7789	472.873	394.319	910.042	328.028
K02110	2083.79	1715.26	1694.41	179.598	957.01	694.203	112.069	14.2641	1357.56	1283.06	677.624	329.576	423.554	369.356	931.388	386.997	605.238	221.88	472.429	253.724	27.0513	1459.13	995.595	1603.91	2626.48	1351.19	1130.2	1799.81	3162.47	4.90196	2701.43	1220.59	63.6594	107.605	729.546	1604.56	132.219	43.4677	73.2055	442.13	960.077	1608.84	14.2162	94.3794	86.8677	615.095	567.83	1043.21	428.962
K01715	1834.81	1136.82	1776.18	560.794	642.237	873.502	1458.38	283.828	1160.4	1022.4	611.127	59.478	163.205	556.383	834.105	542.746	714.44	406.525	0	321.791	153.849	660.015	591.69	2895.62	3261	560.214	1111.68	826.703	2575.31	111.282	2346.1	628.103	45.9591	152.391	898.866	1761.52	1249.92	84.6336	78.0549	517.412	554.214	1578.88	18.8558	240.071	215.728	518.122	863.964	944.535	675.53
K00963	873.619	529.274	1076.65	321.818	962.693	744.283	1099.08	204.541	1446.43	1025.57	466.781	265.558	561.586	203.306	968.345	433.783	562.12	380.64	964.981	225.675	72.5945	4293.02	1324.73	3114.58	2311.25	1264.94	393.885	993.54	1965.28	137.693	991.592	381.079	86.0241	197.736	1246.65	1296.27	1274.4	82.9821	117.694	436.212	667.088	2175.41	46.605	109.189	133.861	398.331	388.852	447.898	271.527
K15986	1152.41	664.466	1252.44	141.709	72.1389	778.433	899.503	170.739	1644.28	1341.34	359.189	152.317	413.045	232.027	454.59	263.052	557.649	487.68	776.254	237.229	28.2628	2223.96	1228.02	4232.47	3124.71	1009.57	453.431	911.14	2686.03	69.6148	1620.05	404.516	67.1278	191.798	892.108	1606.89	1438.4	94.0284	124.236	672.297	815.548	2599.68	28.4346	57.8636	102.989	296.709	403.84	514.858	483.77
K09810	1948.6	2918.51	2373.4	86.3935	569.785	213.459	758.798	60.8408	128.127	184.24	490.39	1149.07	586.194	79.3064	427.785	409.435	769.117	491.031	152.696	454.883	148.968	723.914	998.012	581.699	627.561	3029.2	2016.41	2108.61	754.131	833.317	1873.67	1385.67	37.8039	163.789	836.627	2382.66	588.524	96.5927	130.033	378.955	1697.26	1015.58	30.3066	333.867	196.68	476.638	519.161	445.504	235.305
K14742	1653.03	1374.16	1743.91	137.795	460.312	450.675	1029.7	143.266	889.948	817.258	387.624	761.917	501.81	127.912	495.215	385.575	539.008	565.753	127.207	388.191	126.497	551.798	793.959	3313.89	1213.49	1531.3	1399.4	1136.35	1995.34	725.61	2179.6	1526.86	30.1099	132.545	1052.43	2151.02	1092.3	131.166	143.948	578.434	1287.91	1300.19	53.7923	337.87	185.261	363.909	733.779	553.875	300.417
K07082	1465.39	1264.29	1410.22	144.732	563.996	210.911	1129.61	264.255	1269.59	1036.68	485.031	410.996	257.562	141.816	675.746	281.921	435.618	373.661	77.5708	308.139	68.3922	2799.68	1456.82	1446.03	1644.13	1315.4	1176.44	1327.17	1859.52	454.098	1844.45	1176.61	52.4769	109.059	830.132	1609.15	655.978	81.5077	171.406	731.158	1369.84	1757.98	26.7294	69.7176	49.1048	416.876	577.713	507.052	297.063
K00337	1885.27	2415.22	2401.91	15.4652	552.372	245.646	942.174	78.3422	93.4982	112.248	328.504	876.531	1007.8	24.3014	612.251	485.883	492.3	168.118	901.833	417.649	154.096	660.116	966.695	252.61	528.073	3278.16	2104.94	1309.9	380.715	1619.47	2158.09	1674.36	38.1291	132.35	812.15	2811.67	606.433	91.8588	199.282	426.199	1488.62	842.246	48.6147	486.809	139.28	274.933	658.293	467.756	135.507
K01372	1757.23	1363.18	1023.29	114.987	43.9865	125.234	681.562	187.329	871.49	429.917	859.852	388.186	197.979	201.636	456.777	337.092	378.532	99.8598	15.5206	234.581	11.3296	1197.88	1042.18	1081.61	552.586	2066	1339.33	1770.29	1077.26	500.269	1696.8	1110.86	0	32.6183	981.117	2019.04	822.198	89.7362	156.615	429.91	1935.02	2268.62	37.9985	129.627	94.5013	423.852	629.189	392.071	135.044
K00331	1824.64	2364.31	2494.49	60.0982	514.232	263.806	747.187	69.4899	171.649	175.415	450.851	1327.02	1056.85	70.9015	610.435	499.185	476.481	675.732	909.385	556.501	207.07	664.627	832.998	444.935	540.589	3200.68	1915.82	1469.13	461.646	1297.36	1831.71	1490.93	27.911	112.74	831.445	2285.78	550.015	86.6738	190.542	419.977	1476.8	1053.63	44.8407	473.053	233.877	432.424	648.486	550.39	178.282
K01934	1104.67	797.778	817.872	182.581	670.125	307.37	1082.78	227.856	1163.38	998.726	596.599	502.835	428.678	223.302	710.25	440.091	522.182	472.536	466.759	284.396	47.6026	2925.74	1277.45	3035.38	1227.65	1358.4	900.77	926.132	1757.82	368.141	2045.21	1370.03	31.7038	106.168	795.477	1169.13	620.304	147.22	119.194	638.325	1325.44	1666.96	17.74	89.33	69.2675	314.107	664.811	766.135	260.421
K02426	1819.8	2712.16	2518.71	20.9231	983.299	270.734	909.794	43.1601	97.2778	85.6388	448.583	783.913	592.479	31.5921	531.292	412.477	479.935	254.682	634.058	399.503	121.694	1224.04	1021.7	292.965	615.092	2682.74	1923.87	1997.77	538.117	995.732	2507.94	1551.84	41.2763	114.35	1103.42	2617.64	755.568	80.3685	201.097	408.429	1520.11	895.866	30.1472	222.485	64.9483	171.254	517.938	390.88	163.313
K03925	1481.57	1725.02	1292.22	155.913	776.87	334.46	1042.39	220.359	773.26	900.825	596.883	409.712	378.346	885.162	660.601	390.277	316.857	116.299	655.853	331.361	155.084	2359.51	1357.69	611.037	1627.95	1526.93	941.307	1194.63	1852.69	385.465	2178.96	860.944	39.1572	87.9537	704.857	1881.73	905.904	96.6778	83.6863	411.768	1148.44	1708.74	19.3488	16.6533	33.3261	412.047	840.054	840.545	185.676
K00177	2289.17	3636.29	2975.13	132.56	51.8083	350.109	522.386	34.4416	85.7722	87.891	414.073	712.329	468.398	73.6529	374.826	285.744	830.287	252.379	97.6159	243.192	155.592	0	1044.35	469.649	1052.57	3008.22	1942.92	2192.97	697.039	636.998	2428.44	1602.3	42.2625	139.796	889.871	2867.35	607.614	55.8873	240.403	328.433	1506.72	910.701	67.8231	358.445	149.296	386.16	326.781	257.474	250.875
K01480	1289.76	558.525	913.615	378.719	643.748	912.9	900.656	114.03	971.727	1661.32	412.657	309.433	334.448	203.176	1571.26	714.426	656.319	478.75	96.9668	353.88	100.912	718.482	557.015	4517.94	1935.45	375.284	615.165	443.97	1676.54	402.974	2840.25	1296.67	57.0556	121.73	769.568	1135.4	1099.35	73.1752	125.803	501.666	628.281	2120.54	39.1416	155.826	159.732	1377.79	460.994	1337.81	681.086
K02621	1683.85	1777.15	1575.15	55.4846	682.295	313.716	985.003	92.8319	844.041	478.148	428.237	950.584	935.48	88.4697	594.275	477.707	380.791	199.51	806.119	468.573	172.834	1725.52	907.114	290.325	586.138	2606.47	1720.59	1387.45	644.756	1290.64	2350.71	1628.09	41.7146	82.4787	1127.29	2354.56	720.179	90.9117	133.116	349.482	1349.51	992.428	38.1309	364.714	157.106	296.285	675.92	478.684	151.982
K09861	2296.49	2474.82	1993.93	70.4525	684.542	68.9524	1554.44	270.47	1391.54	1143.75	1511.96	449.898	262.33	91.5418	671.399	375.214	139.468	222.976	43.423	306.009	58.0154	2451.01	1451.31	195.901	2822.03	837.906	1511.55	731.333	1276.46	320.439	2828.38	1525.85	63.5509	109.402	974.038	1859.11	1447.38	94.8665	143.412	477.317	1000.91	1021.31	8.23086	32.0019	17.8059	50.9555	655.731	506.626	119.721
K00265	1716.09	1693.4	1890.81	94.5888	825.403	360.241	654.031	84.2984	159.543	173.26	602.214	641.958	610.058	164.373	725.737	550.714	591.129	641.717	922.122	382.211	63.94	878.349	863.152	832.332	678.812	3072.13	1361.98	1816.04	681.301	738.29	1597.87	1059.79	39.945	113.78	786.431	2009.07	685.693	58.4298	153.968	304.949	1450.53	1523.2	44.8186	131	94.6452	472.589	672.519	522	115.406
K09817	1495.76	1163.57	849.189	199.493	555.652	463.294	1173.18	224.076	1374.56	981.287	490.822	729.993	387.987	295.099	557.188	456.02	444.325	847.779	205.548	506.972	278.103	2863.8	1470.09	397.988	902.917	1141.53	1205.98	1060.2	1936.16	958.93	2064.57	1517.73	48.4496	120.691	1197.95	2278.87	1221.26	70.4313	94.5063	456.599	1235.9	1328.06	29.3528	215.127	145.136	318.659	844.296	655.65	396.92
K12251	1732.07	2186.14	2483.86	145.269	28.5982	616.42	1010.61	149.227	668.112	555.138	941.701	685.45	492.356	208.293	726.84	406.354	846.856	145.97	736.517	387.074	34.9654	39.5258	763.66	649.785	1593.59	2673.58	1580.88	1683.45	1958.85	914.135	2500.99	1250.26	14.3296	107.294	814.815	2765.84	734.698	53.3503	118.617	353.528	1243.23	779.631	10.6716	75.9917	22.568	314.74	639.393	606.367	201.089
K15533	1615.03	1056.25	1386.75	600.617	493.395	720.557	887.509	169.2	1248.34	1169.82	564.396	127.349	371.392	1376.31	755.087	400.414	545.607	188.179	150.009	255.395	93.1954	230.904	792.86	2907.26	3019.12	609.909	661.005	618.531	1781.92	78.0705	2198.4	509.081	52.0025	235.362	1041.13	2313.02	1901.78	86.2867	112.557	618.1	838.676	2461.75	34.0519	43.4304	84.3543	364.048	616.68	703.207	452.225
K00882	920.994	693.024	1178.15	231.696	599.802	440.846	1109.66	219.332	1642.24	1393.96	479.068	17.1347	145.063	299.15	512.354	240.639	529.661	387.817	11.3223	298.424	31.6368	2926.57	1295.64	4938.23	2666.51	327.397	556.86	1064.96	2984.24	96.3866	1937.89	470.697	48.3521	139.262	736.316	1163.22	777.579	76.1725	130.654	669.767	605.648	1615.44	22.6799	80.8429	95.5505	390.101	462.644	709.977	505.541
K02073	1155.68	775.896	989.255	135.483	861.428	455.974	849.825	176.366	1084.15	847.374	511.663	54.982	89.3426	202.734	387.893	227.08	453.903	185.639	17.1263	184.634	14.7354	6621.74	2435.62	1958.61	2398.91	674.916	412.144	1330.71	1722.66	81.1051	1415.85	421.372	105.573	236.658	1327.82	1413.5	1394.74	62.1511	92.0863	473.644	780.561	2082.42	24.7376	31.6793	56.5527	246.627	294.43	293.176	330.734
K07089	1159.24	345.045	923.829	102.7	1226.56	480.151	843.203	83.7417	1431.51	1252.58	307.227	220.161	286.386	273.84	555.87	351.703	554.124	423.067	170.815	258.618	104.376	2867.77	1465.04	5757.84	2076.44	517.432	915.494	481.086	1456.42	274.421	2048.27	560.581	89.9244	124.101	1044.49	898.761	532.545	81.0902	111.083	608.318	568.21	1779.6	21.0934	80.5128	94.7871	495.225	258.742	554.888	429.691
K04042	772.066	387.13	784.158	306.764	839.292	615.861	1000.05	194.13	1409.39	1174.56	429.893	90.5446	139.176	301.803	621.49	341.743	707.459	402.586	46.7506	241.667	50.8242	3390.81	1409.08	4221.44	2075.73	657.947	329.342	919.357	1739.39	118.429	1594.91	440.548	95.7301	194.623	1122.82	1221.42	1200.36	73.0314	103.902	538.692	698.478	2101.99	39.9428	112.725	122.506	703.994	368.091	620.255	498.493
K01839	1252	810.802	1445.78	216.413	786.659	763.993	1240.81	208.554	1940.75	1500.66	548.127	36.307	175.583	244.295	301.637	160.384	519.866	256.606	25.1462	297.68	58.8096	2922.74	1252.07	3281.76	2697.87	876.648	528.684	778.463	3210.4	90.1969	1732.77	433.735	58.2683	221.619	1080.97	1617.85	1242.09	93.1102	106.249	624.075	802.409	2054.57	31.4004	55.8624	136.787	392.658	345.883	369.782	374.373
K01678	1582.59	1278.5	1566.37	392.215	146.872	764.882	766.101	115.581	1105.25	1276.67	479.149	33.4683	153.07	342.54	660.664	323.064	542.261	442.476	19.5565	239.532	44.8374	1213.99	1033.38	5115.19	3554.72	417.749	848.018	755.819	2742.84	44.1631	2341.35	675.601	36.9431	144.516	676.718	1417.83	1139.2	74.0999	102.94	486.789	618.859	1801.84	25.7051	60.7554	79.674	604.622	416.987	745.08	543.723
K00208	2057.8	1945.66	1824.5	31.313	492.661	239.81	1028.23	87.3685	70.7978	82.473	170.732	816.53	649.762	26.4251	568.066	343.87	332.34	84.2775	810.721	301.111	121.787	1085.57	821.989	152.26	640.317	2677.6	1878.87	1549.28	437.33	1424.31	2804.2	1655.84	44.2038	104.299	959.955	2498.07	628.869	89.5025	129.946	374.081	1523.17	871.278	49.8764	394.421	160.1	379.768	627.814	361.181	115.341
K03327	2161.94	1165.01	864.652	38.8664	1031.1	205.79	859.832	86.0032	657.658	439.888	405.024	1178.41	774.289	39.9484	767.756	604.854	188.435	407.815	919.894	520.492	237.883	2515.27	1326.14	119.53	222.027	1924.57	1702.55	647.808	353.095	1211.68	2493.48	2199.15	57.5572	30.3767	1159.43	2384.21	566.984	124.191	157.722	514.969	1681.91	1190.01	28.4761	254.553	68.9174	196.735	898.618	651.594	141.118
K01999	827.821	641.448	757.698	195.031	1531.27	559.258	1138.87	184.084	1227.54	960.567	441.588	80.3726	93.2795	101.221	533.612	291.246	423.249	174.839	11.7229	248.63	47.5936	3441.81	1219.97	2109.82	2073.53	1315.05	366.053	1319.39	1795.43	175.765	1378.47	571.299	78.0343	168.137	956.268	1165.61	863.361	85.3093	102.447	478.713	907.61	2548.22	27.8222	78.7524	98.0516	562.06	210.739	393.534	321.064
K20444	1344.25	675.175	1151.72	118.22	59.2336	628.742	709.009	86.4798	966.151	1064.95	315.598	0	212.685	96.0412	525.359	266.599	521.861	616.922	0	136.758	14.5107	622.013	923.733	7070.2	3655.25	387.112	433.408	586.29	2255.39	41.0891	1624.57	459.301	53.5552	174.17	756.493	1571.3	1014.19	137.335	226.181	930.55	1004.23	2544.55	40.3427	40.5592	85.7782	303.565	357.04	416.612	568.778
K03426	1705.15	1071.13	1499.06	158.366	676.308	378.976	1163.62	236.376	737.052	648.726	592.138	309.55	162.897	357.804	424.201	334.021	443.233	229.323	27.5996	307.93	42.0553	718.723	864.144	1824.13	2114.83	1474.52	961.689	1138.18	2635.83	462.117	2300.92	927.941	34.5316	112.949	940.654	2106.6	639.552	110.2	124.919	511.262	1331.82	2145.92	26.356	79.0506	45.0251	283.294	564.355	528.246	326.126
K01895	1787.07	1873	1817.07	167.421	856.258	170.787	1202.41	89.4249	133.585	302.063	292.536	1201.2	401.415	153.73	767.865	477.252	710.569	406.248	101.311	416.78	150.557	869.604	897.894	292.179	574.482	1944.88	1780.39	1276.02	436.392	1300.15	3000.84	1856.25	64.2697	101.336	1021.56	2498.06	596.882	105.233	154.585	389.379	1606.94	991.401	17.1341	83.2065	45.6576	468.777	677.837	680.866	295.494
K01639	1725.85	1028.19	1372.04	203.401	879.636	626.015	945.477	114.712	1402.17	1199.7	728.1	426.184	552.25	162.291	532.115	342.244	454.751	338.743	816.796	307.852	49.213	1070.08	800.034	3163.3	2016.97	1201.5	896.484	590.194	1213.18	267.641	1941.46	604.111	65.6855	156.681	1351.68	2247.36	844.933	192.308	211.026	650.664	1175.58	1818.86	47.8077	174.477	119.178	282.94	562.601	483.944	331.652
K20490	2655.64	1595.98	1935.05	711.228	54.6081	426.373	927.426	241.112	1163.53	1288.01	777.158	51.4734	36.7593	1514.85	1784.63	681.728	614.49	148.139	19.4405	235.146	95.256	220.945	625.183	781.861	3695.7	353.243	1130.95	934.158	2327.53	124.066	3098.17	955.479	18	25.7252	661.266	1537.65	794.2	26.2973	64.8819	339.818	1150.34	1952.41	0	300.182	86.5905	412.644	393.058	802.257	490.224
K07386	1521.25	1539.79	1250.14	80.3735	48.6172	112.97	535.066	100.733	1102.95	603.596	636.311	750.131	469.4	148.004	443.655	314.324	376.194	179.47	82.0722	303.068	89.7381	1203.1	985.602	796.787	663.129	2050.68	1426.28	1698.53	740.058	948.938	1571.36	1573.51	7.6801	66.6255	940.999	2111.28	816.258	107.726	174.292	441.029	1642.93	1628.21	36.6239	274.915	138.823	402.713	484.626	309.507	194.468
K07402	988.97	1178.94	909.511	241.538	38.4655	542.514	1088.53	199.184	875.991	1191.41	247.884	117.657	211.984	323.591	358.587	192.814	372.172	615.795	19.8945	236.687	39.6226	4198.82	2083.67	3686.77	3519.28	267.995	524.005	829.797	3141.84	119.458	1502.94	484.368	100.471	146.135	756.101	1026.5	1270.17	102.194	158.622	836.575	1052.83	1897.87	14.2678	60.1332	40.7046	215	345.579	499.721	558.946
K00382	1534.81	813.776	537.5	133.192	712.598	268.038	739.726	117.981	732.264	450.911	538.285	913.848	800.035	126.215	557.818	489.201	236.791	255.122	941.769	446.874	200.044	3163.91	1669.91	765.687	263.391	2051	1383.08	668.659	501.862	912.154	1696.24	1475.79	56.2866	63.1226	998.875	1909.81	639.977	155.918	140.356	446.717	1336.78	1380.55	52.0947	255.392	107.172	301.72	829.153	637.087	164.929
K07042	988.94	619.479	1484.25	239.8	549.102	677.538	1048.42	229.443	1524.44	1241.87	516.701	107.58	311.17	323.036	1116.61	502.036	446.939	206.657	497.567	233.216	37.8824	2319.79	1328.72	2054.6	2429.24	1195.83	439.879	975.632	2220.61	118.62	2141.04	556.634	63.8945	228.984	1076.69	1507.82	948.92	87.6627	58.696	560.58	641.899	1932.92	38.7599	36.1785	46.9167	533.93	496.702	742.171	394.092
K06183	666.578	513.349	954.963	102.376	639.603	707.661	940.13	196.686	2527.46	1947.89	560.962	139.875	427.84	309.776	648.706	338.31	520.053	406.31	688.166	317.185	25.3032	3067.53	1018.09	4117.06	2456.06	916.262	360.443	977.115	2171.27	171.576	1508.23	460.054	49.6623	97.9542	796.665	1002.94	716.511	89.6527	99.8026	493.945	522.454	1529.85	12.0134	66.474	66.3821	516.067	363.562	767.441	421.148
K01963	990.006	680.382	1134.6	385.27	676.13	600.751	928.923	103.805	1558.36	1197.75	411.021	73.0104	265.71	231.316	1108.98	530.721	580.26	536.669	22.9738	267.624	110.127	1816.12	660.57	5711.03	2577.66	342.374	657.603	836.744	1988.24	106.019	2143.93	532.576	57.0336	152.423	770.265	1396.76	710.037	67.6266	119.59	584.068	464.626	1375.49	25.5107	86.6634	112.409	673.691	588.55	869.723	589.938
K07813	2208.5	2268.09	2040.98	64.7652	0	159.321	1201.75	289.137	943.887	1266.57	257.703	0	23.84	33.4787	1077.88	425.126	290.743	0	0	228.662	0	122.657	459.625	581.552	3283.91	932.315	968.825	723.157	2534.25	145.577	5844.8	975.851	38.6616	134.458	766.81	2553.26	1262.08	74.9691	142.909	499.377	473.812	1171.26	0	0	20.0884	491.62	486.281	750.726	89.9281
K03771	2085.96	1694.73	1196.03	26.434	665.265	211.115	1165.1	106.613	146.52	113.151	254.515	885.185	678.023	16.9164	688.892	571.277	160.685	215.916	763.19	360.406	99.3751	703.52	1126.74	127.012	302.528	2167.86	1845.75	909.431	381.932	1434.45	2449.94	2074.53	35.0382	50.4127	1102.25	2572.78	807.113	180.135	226.826	512.523	2043.18	1222.35	21.7522	119.328	42.5161	126.624	905.923	566.611	151.91
K03455	1842.47	1408.42	1233.27	31.7484	567.345	441.11	1193.89	116.836	94.2057	50.1261	199.02	784.627	837.303	35.247	672.423	482.428	269.188	165.954	1679.49	359.393	68.0851	700.913	956.146	164.75	325.993	2628.78	1542.8	1159.75	432.645	1332.92	2327.44	1966.33	30.9573	50.1868	972.224	2294.07	884.279	137.187	165.039	404.259	1977.76	1187.21	11.2414	48.0971	19.761	101.291	877.038	593.879	87.336
[truncated: 3,262 more rows]
[truncated: 7 more columns]

## Sheet: Table_S6
Read counts of donor-derived microbial species founded in the patient’s metagenomes using RECAST software.
sample_id	species	n_reads
[truncated: 344 more rows]
